# Supplementary material
Source: Elsevier journal article supplement (https://ora.ox.ac.uk/objects/uuid:7b565d38-0773-4a14-9679-86cdc596b40a/files/rzp38wf87f:mmc3.pdf)

BX441 Post\_Treatment

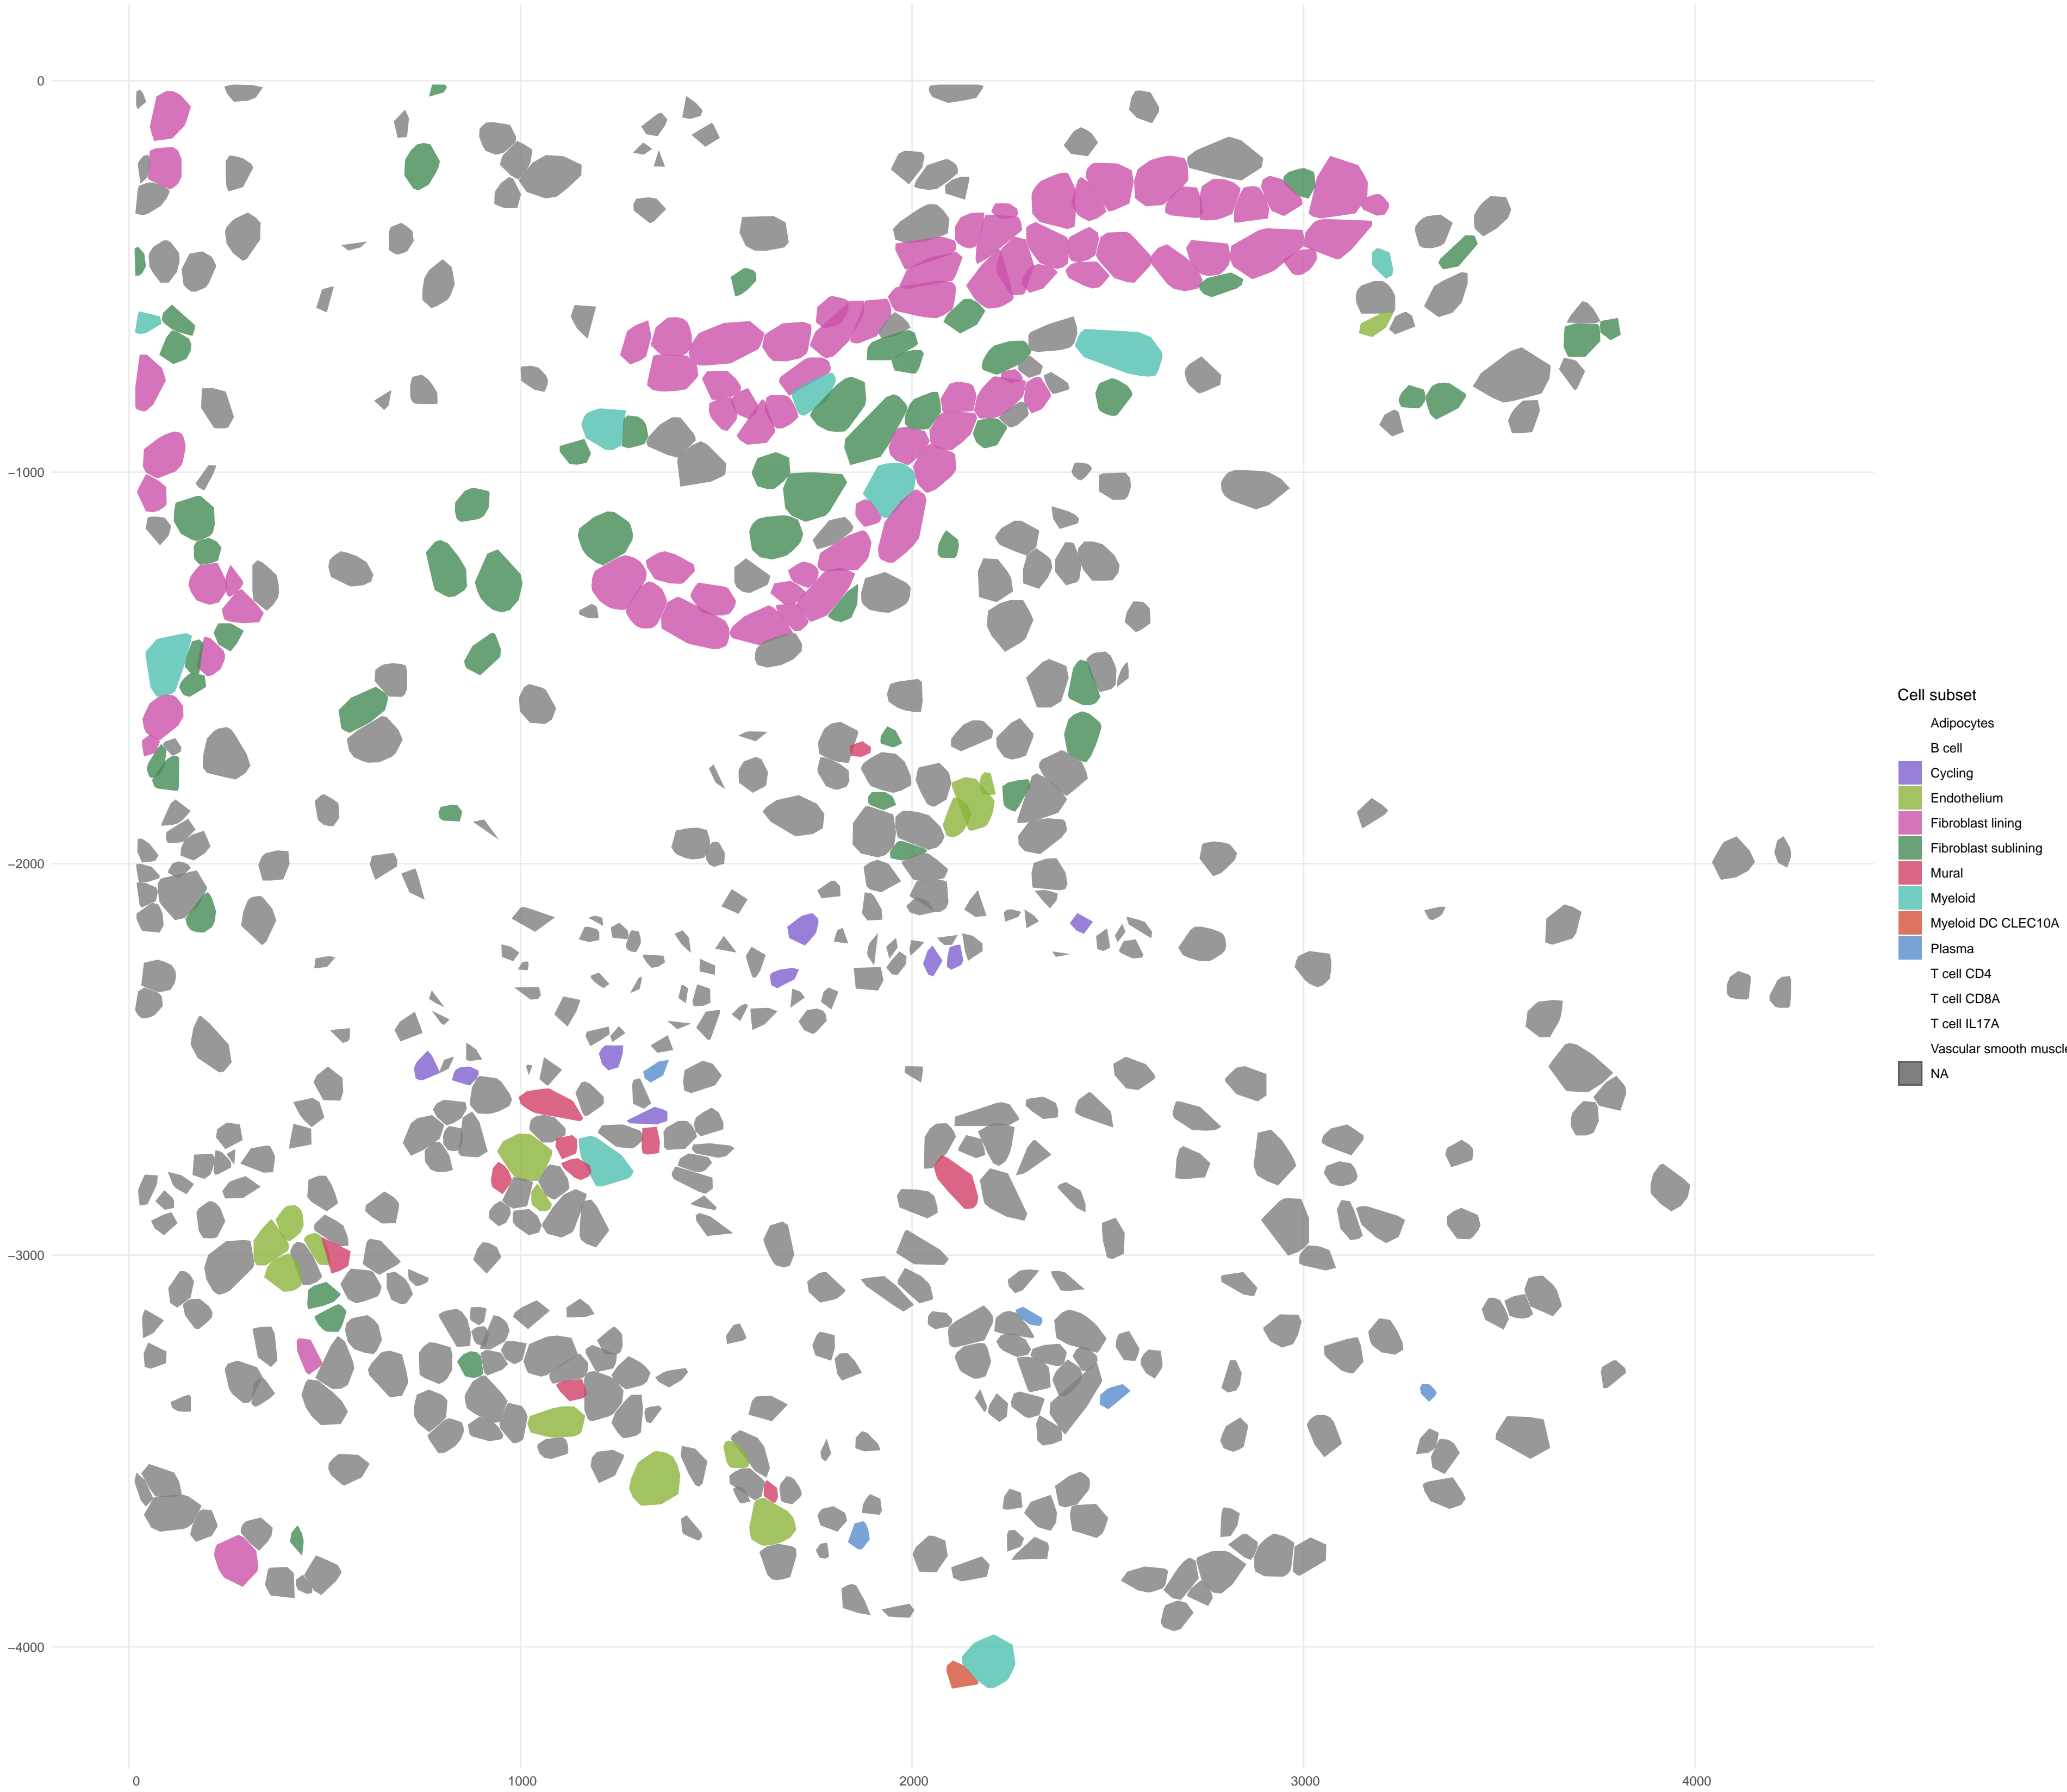

BX423 Baseline

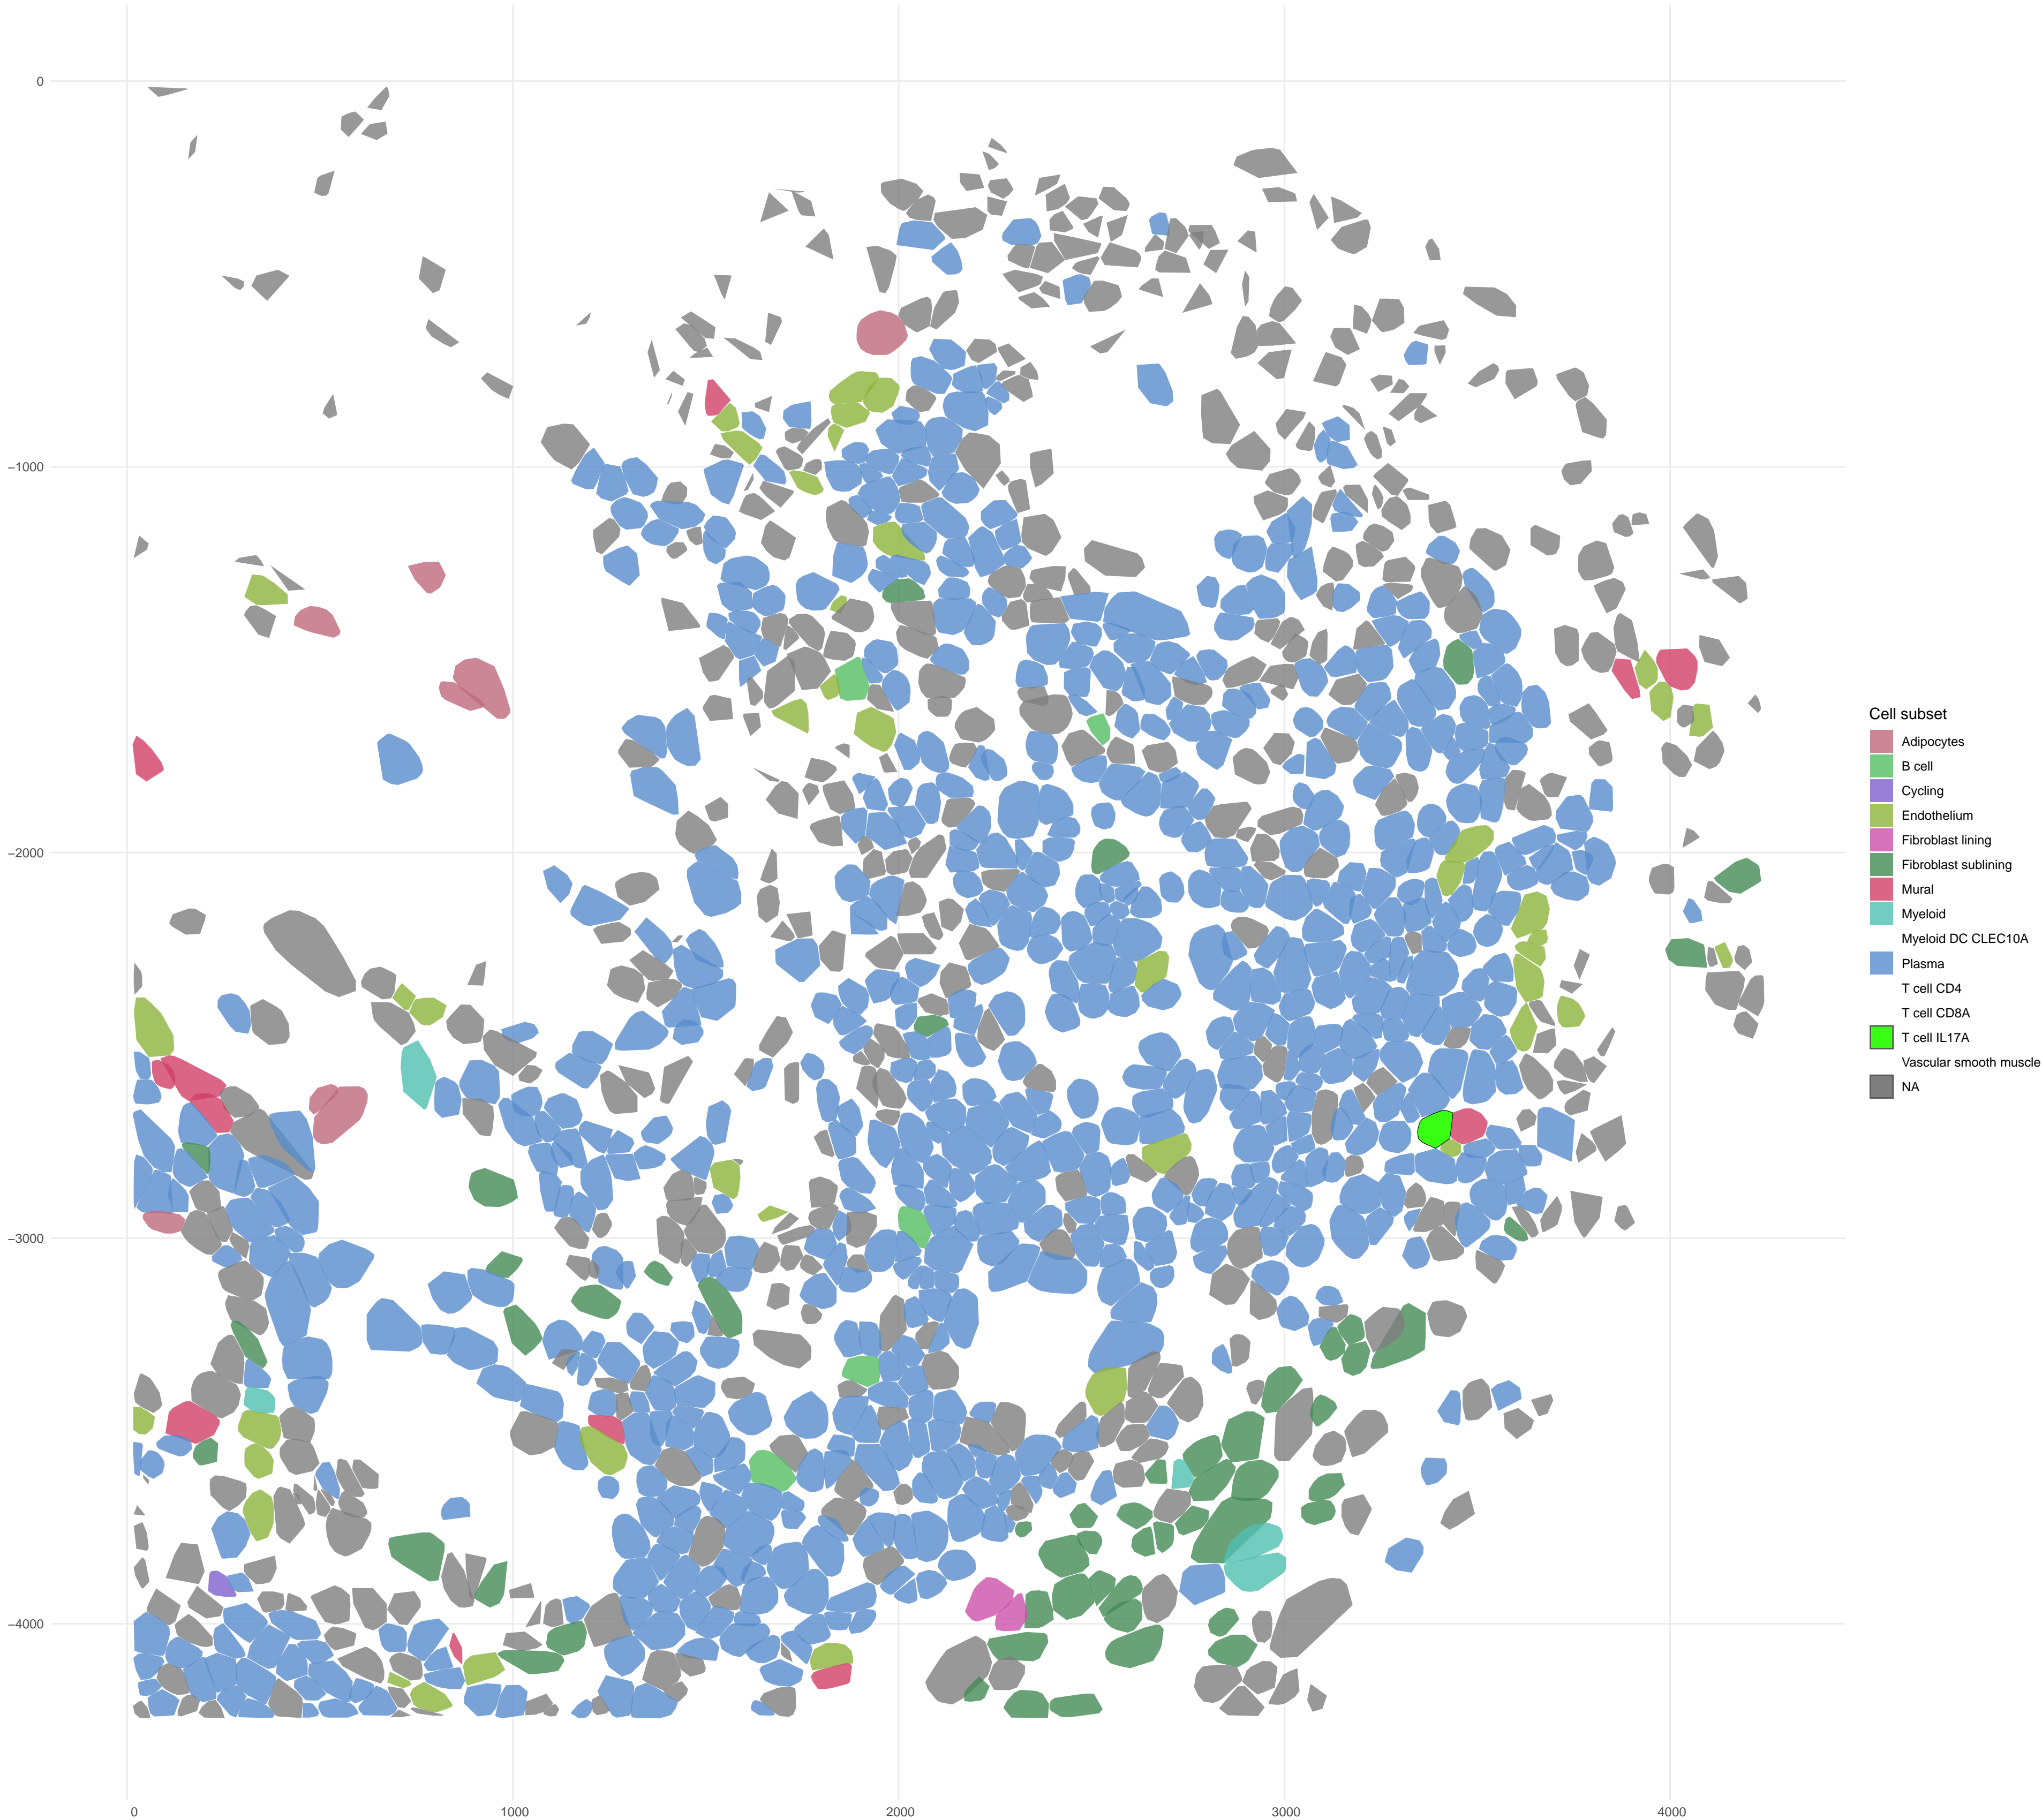

BX439 Post\_Treatment

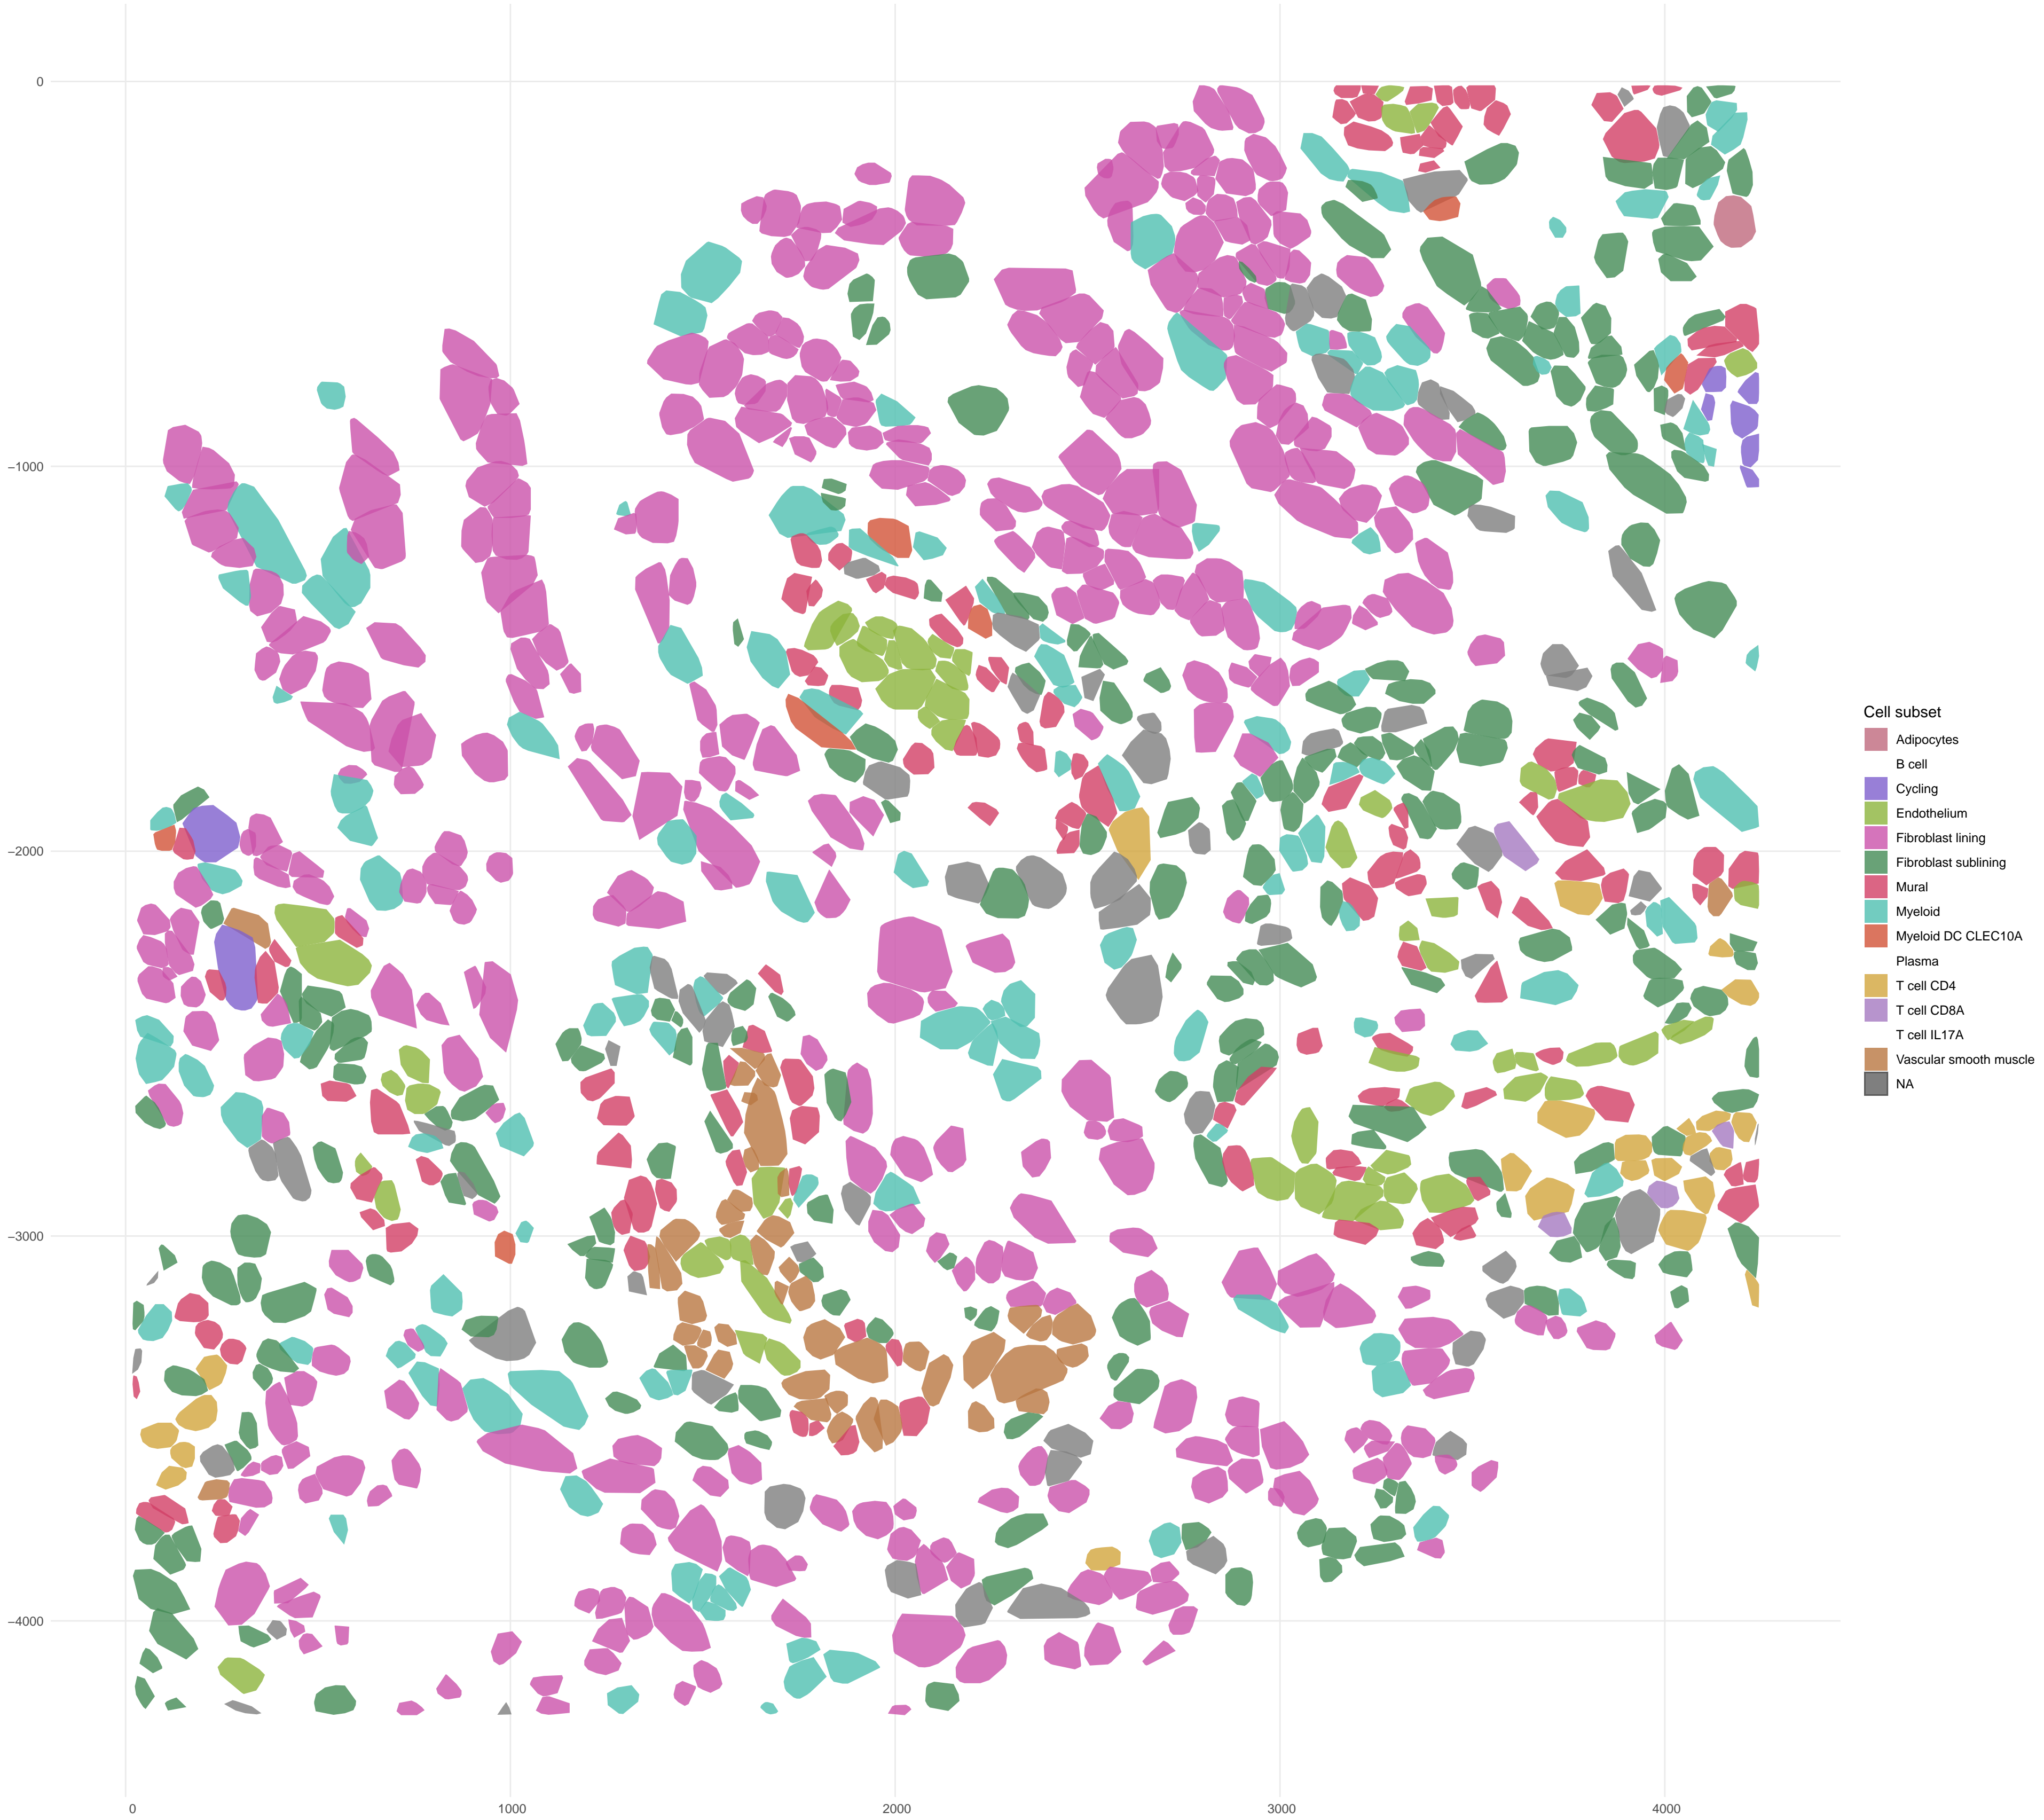



## BX427 Baseline

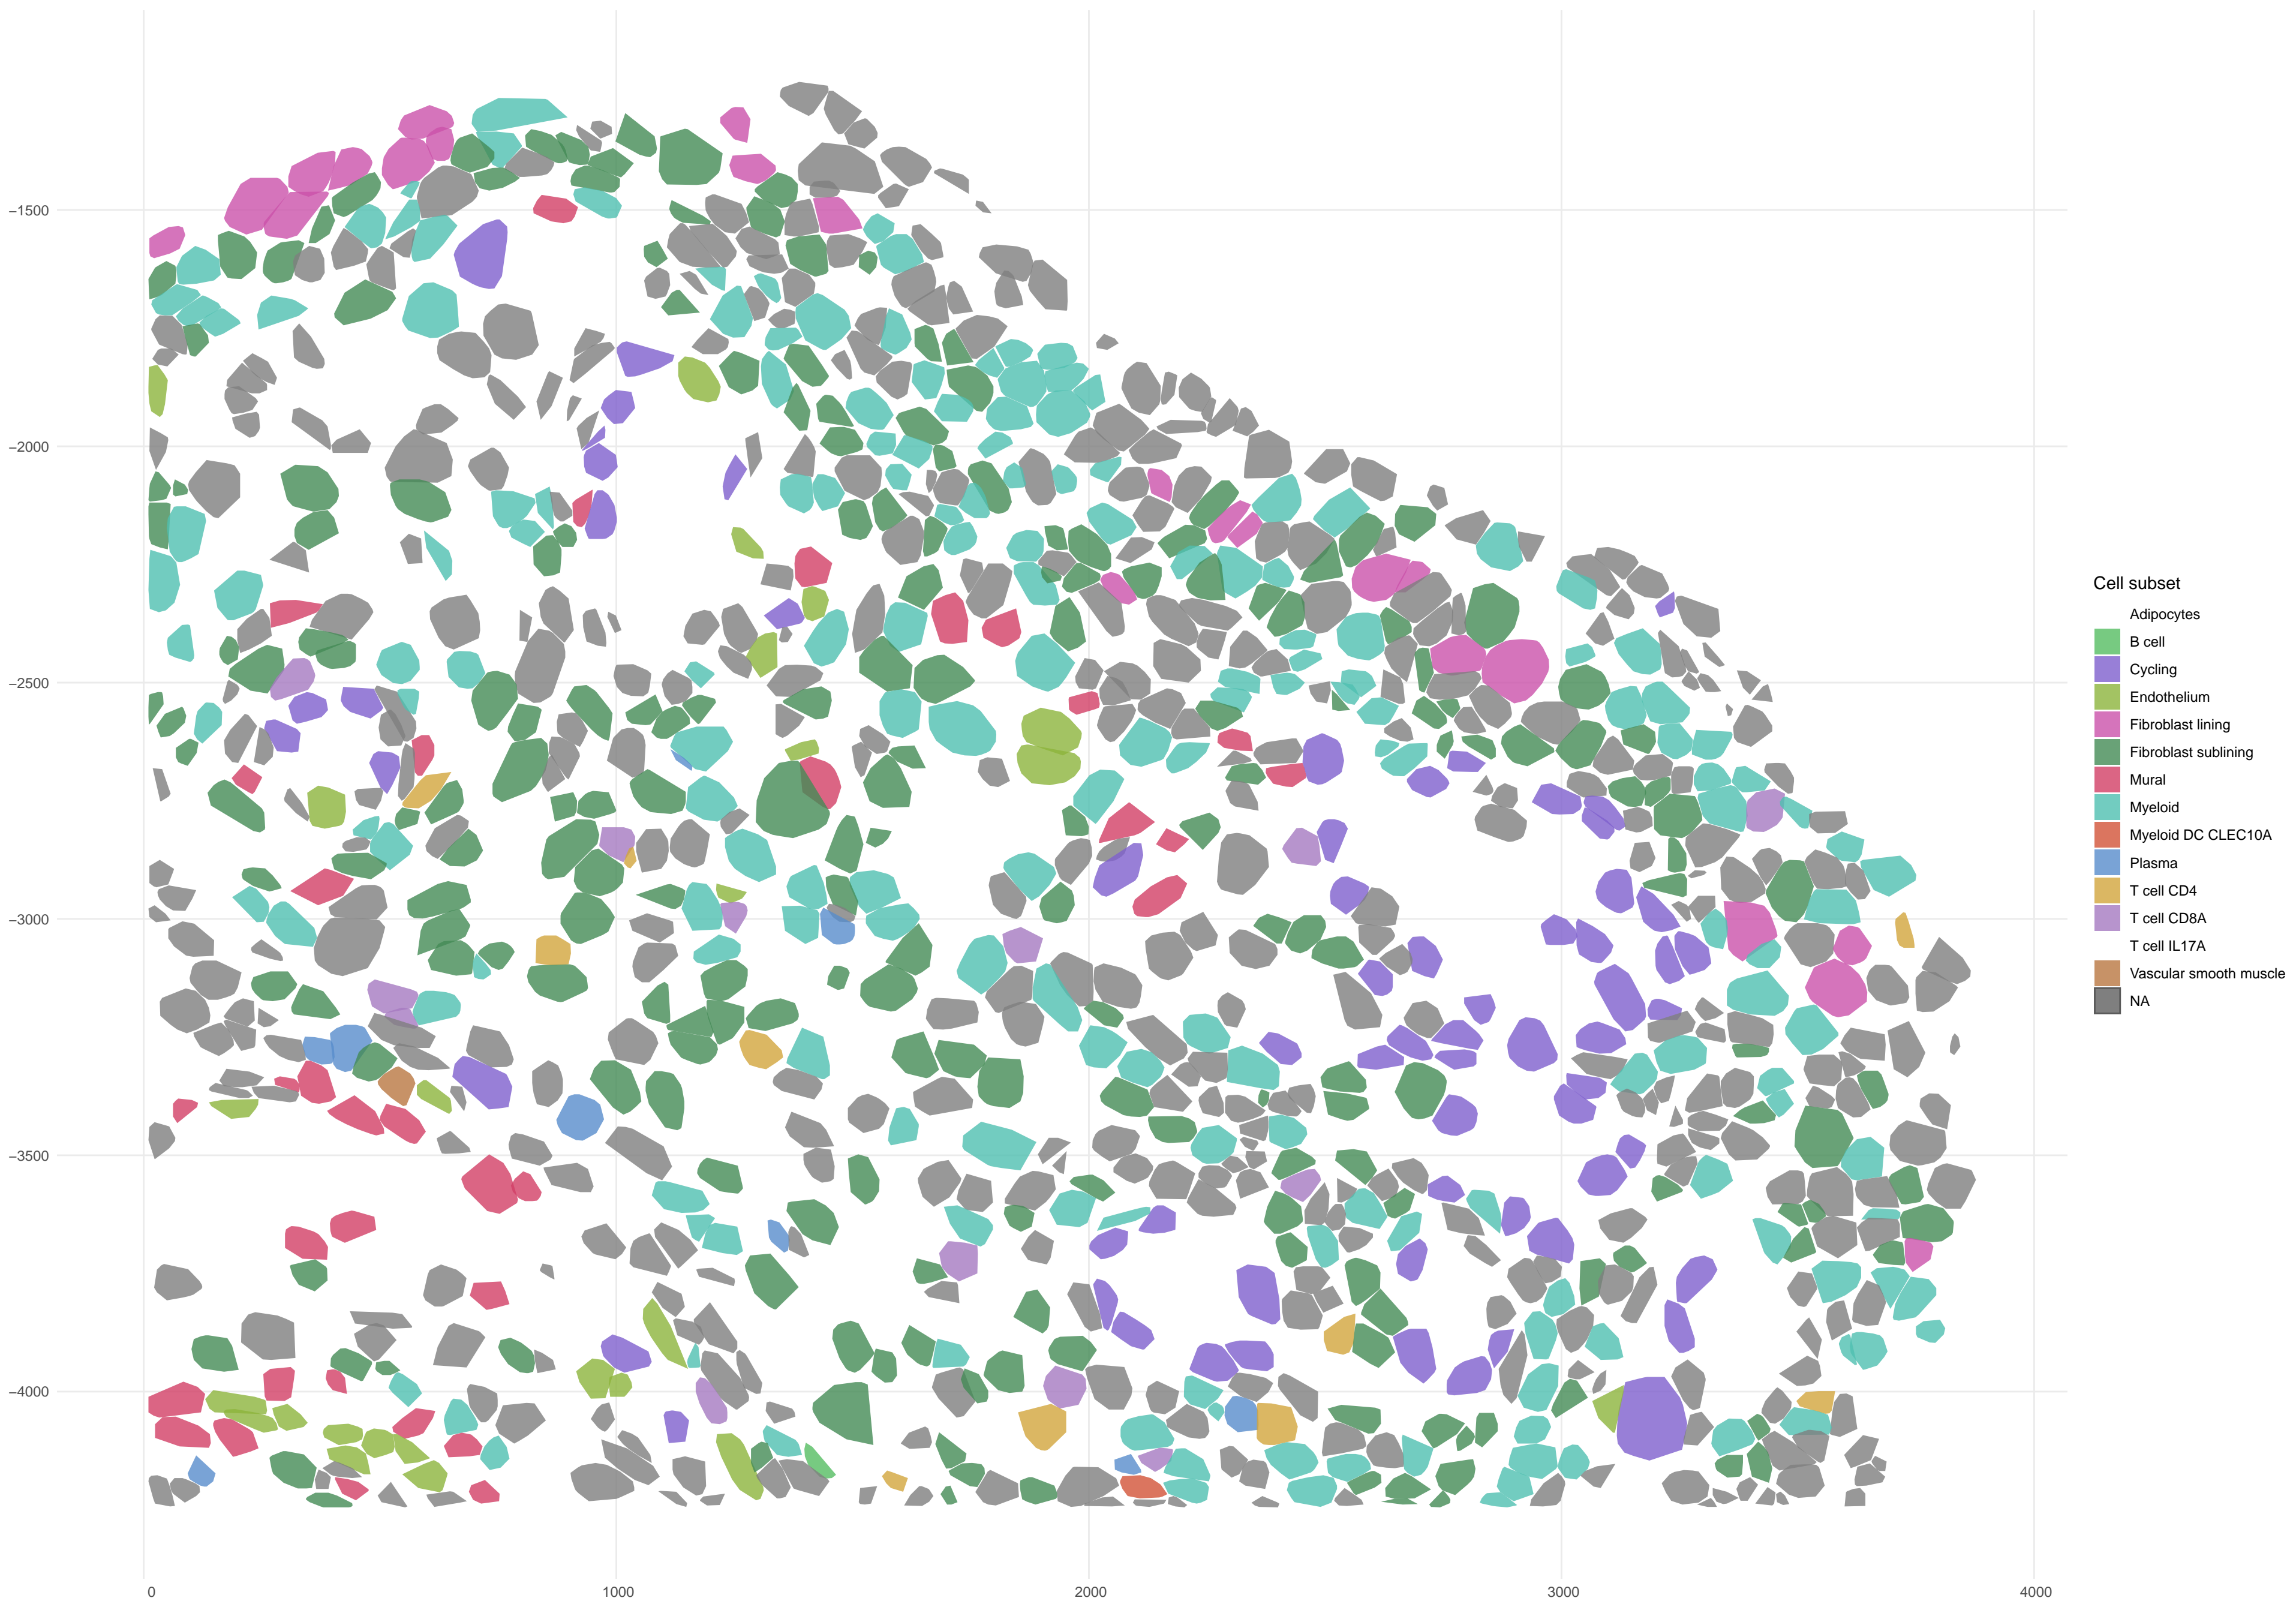

BX438 Post\_Treatment

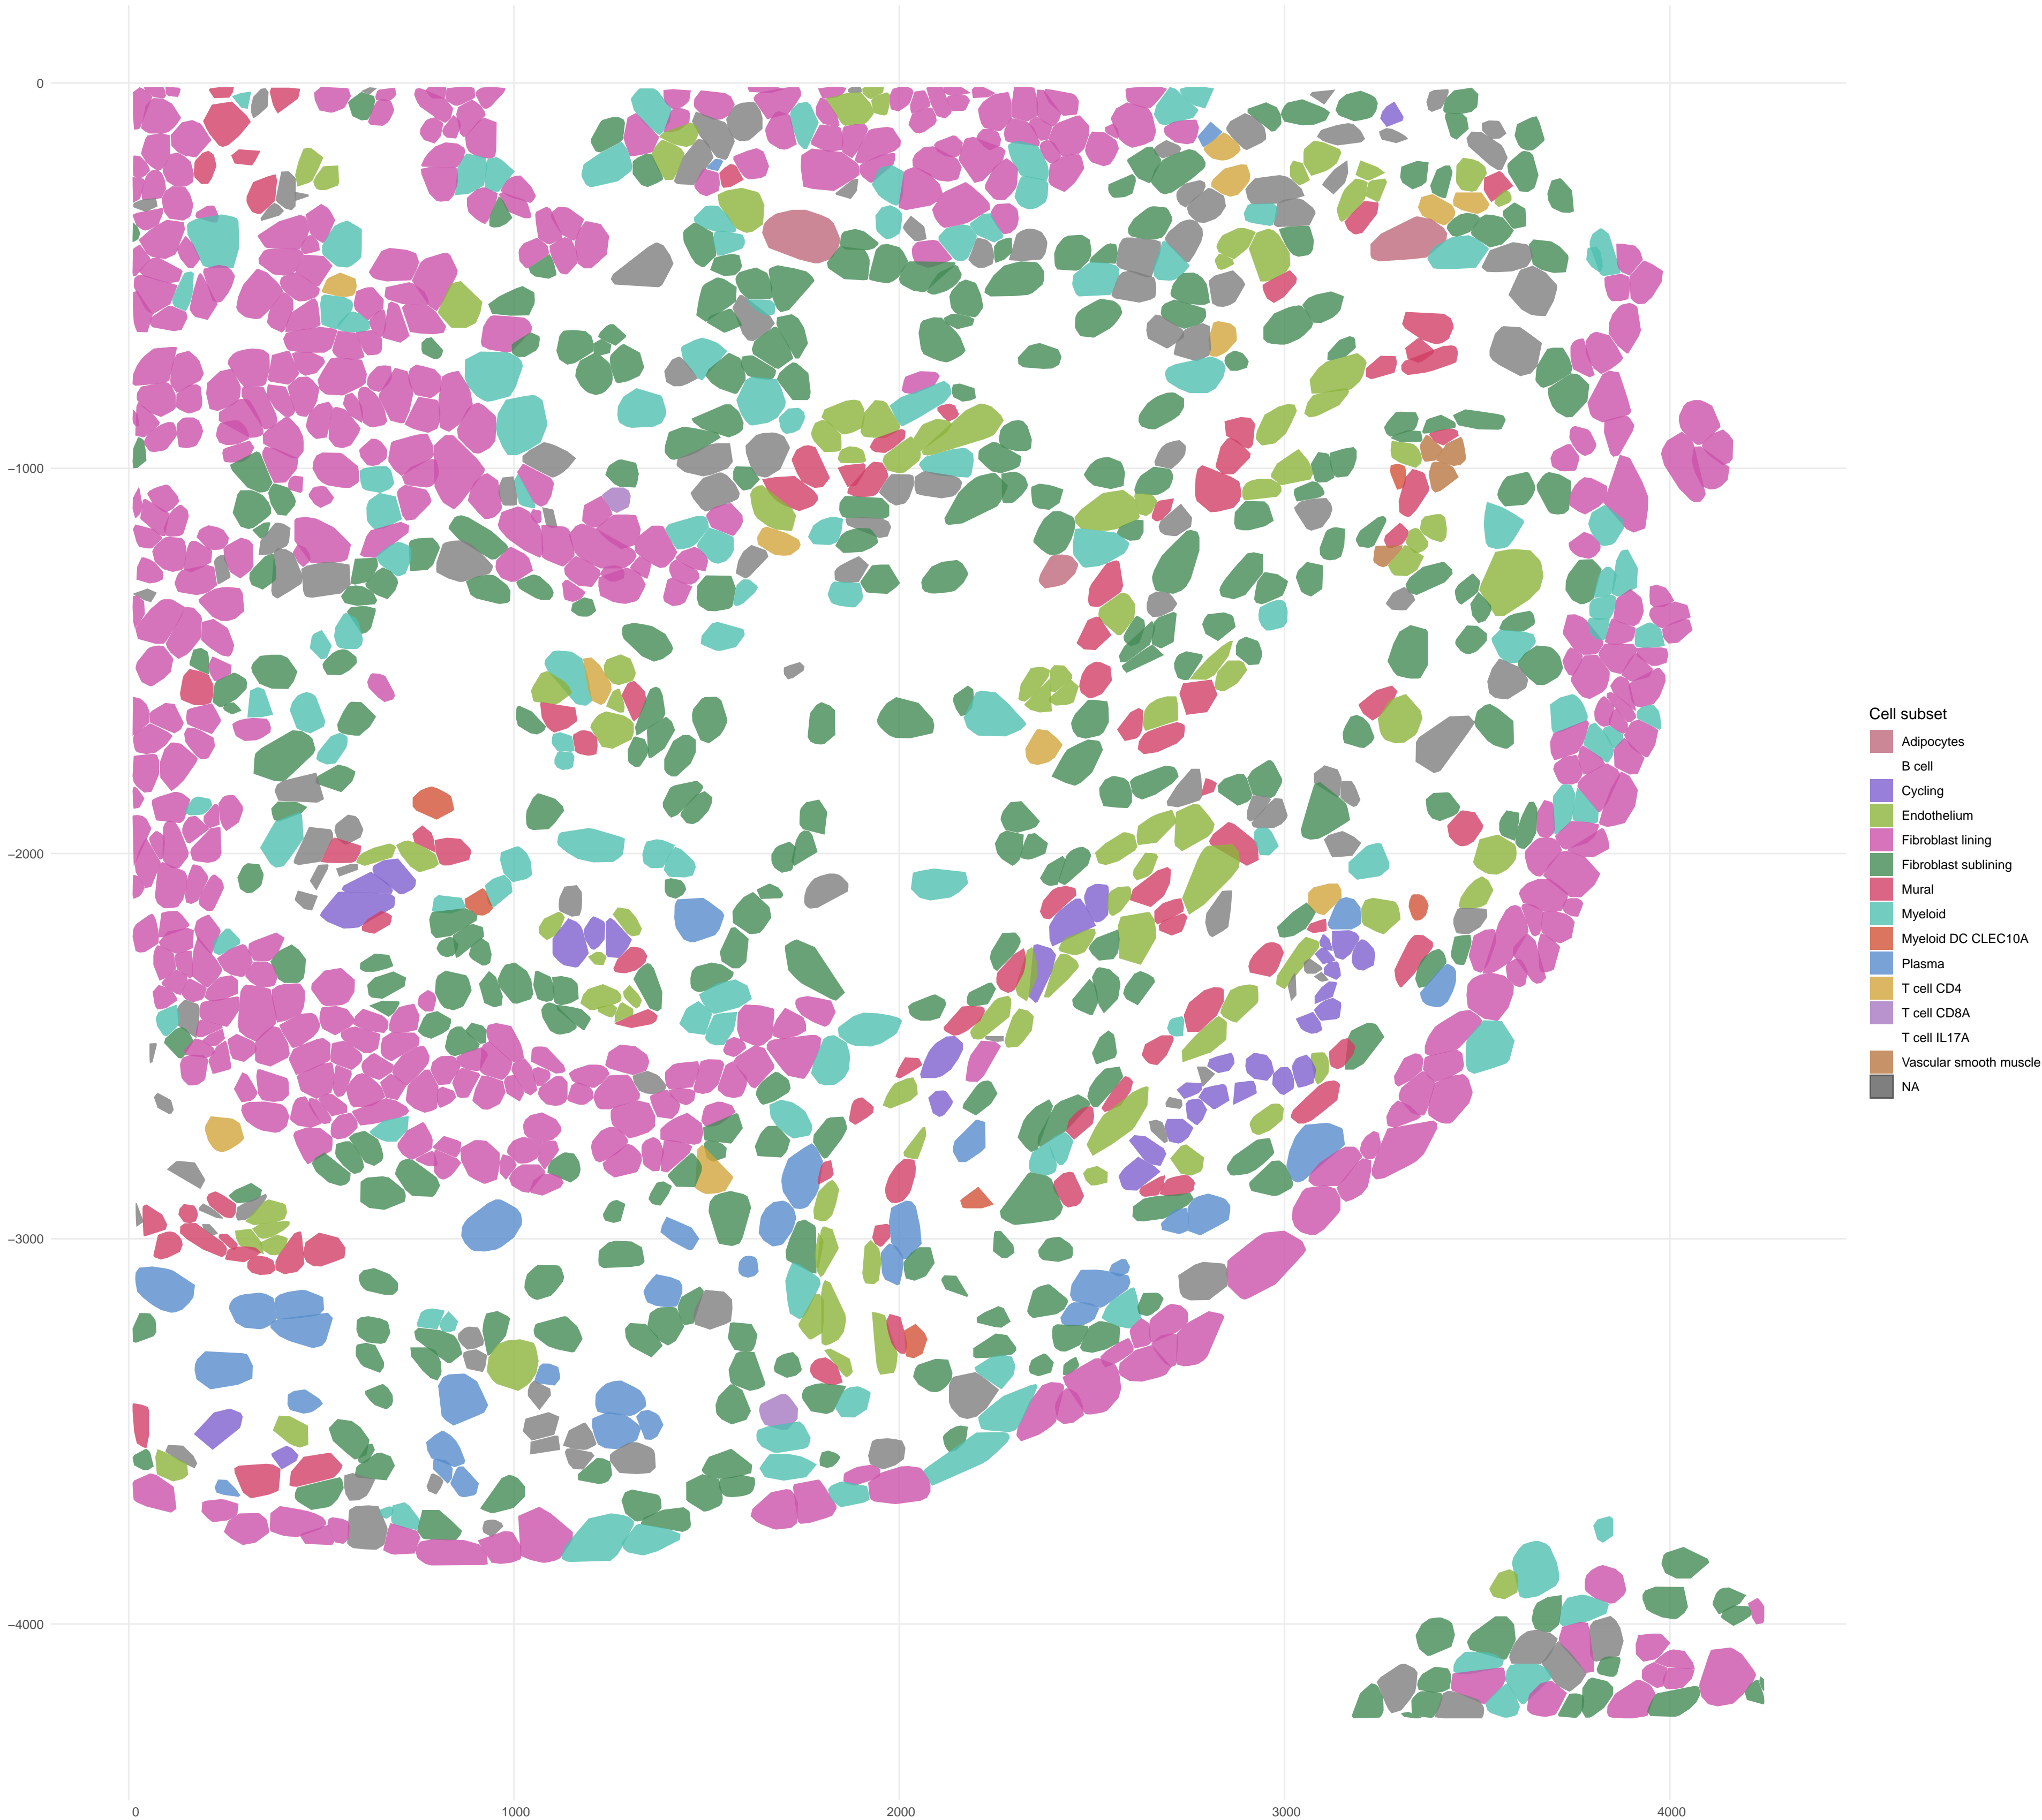

BX420 Baseline

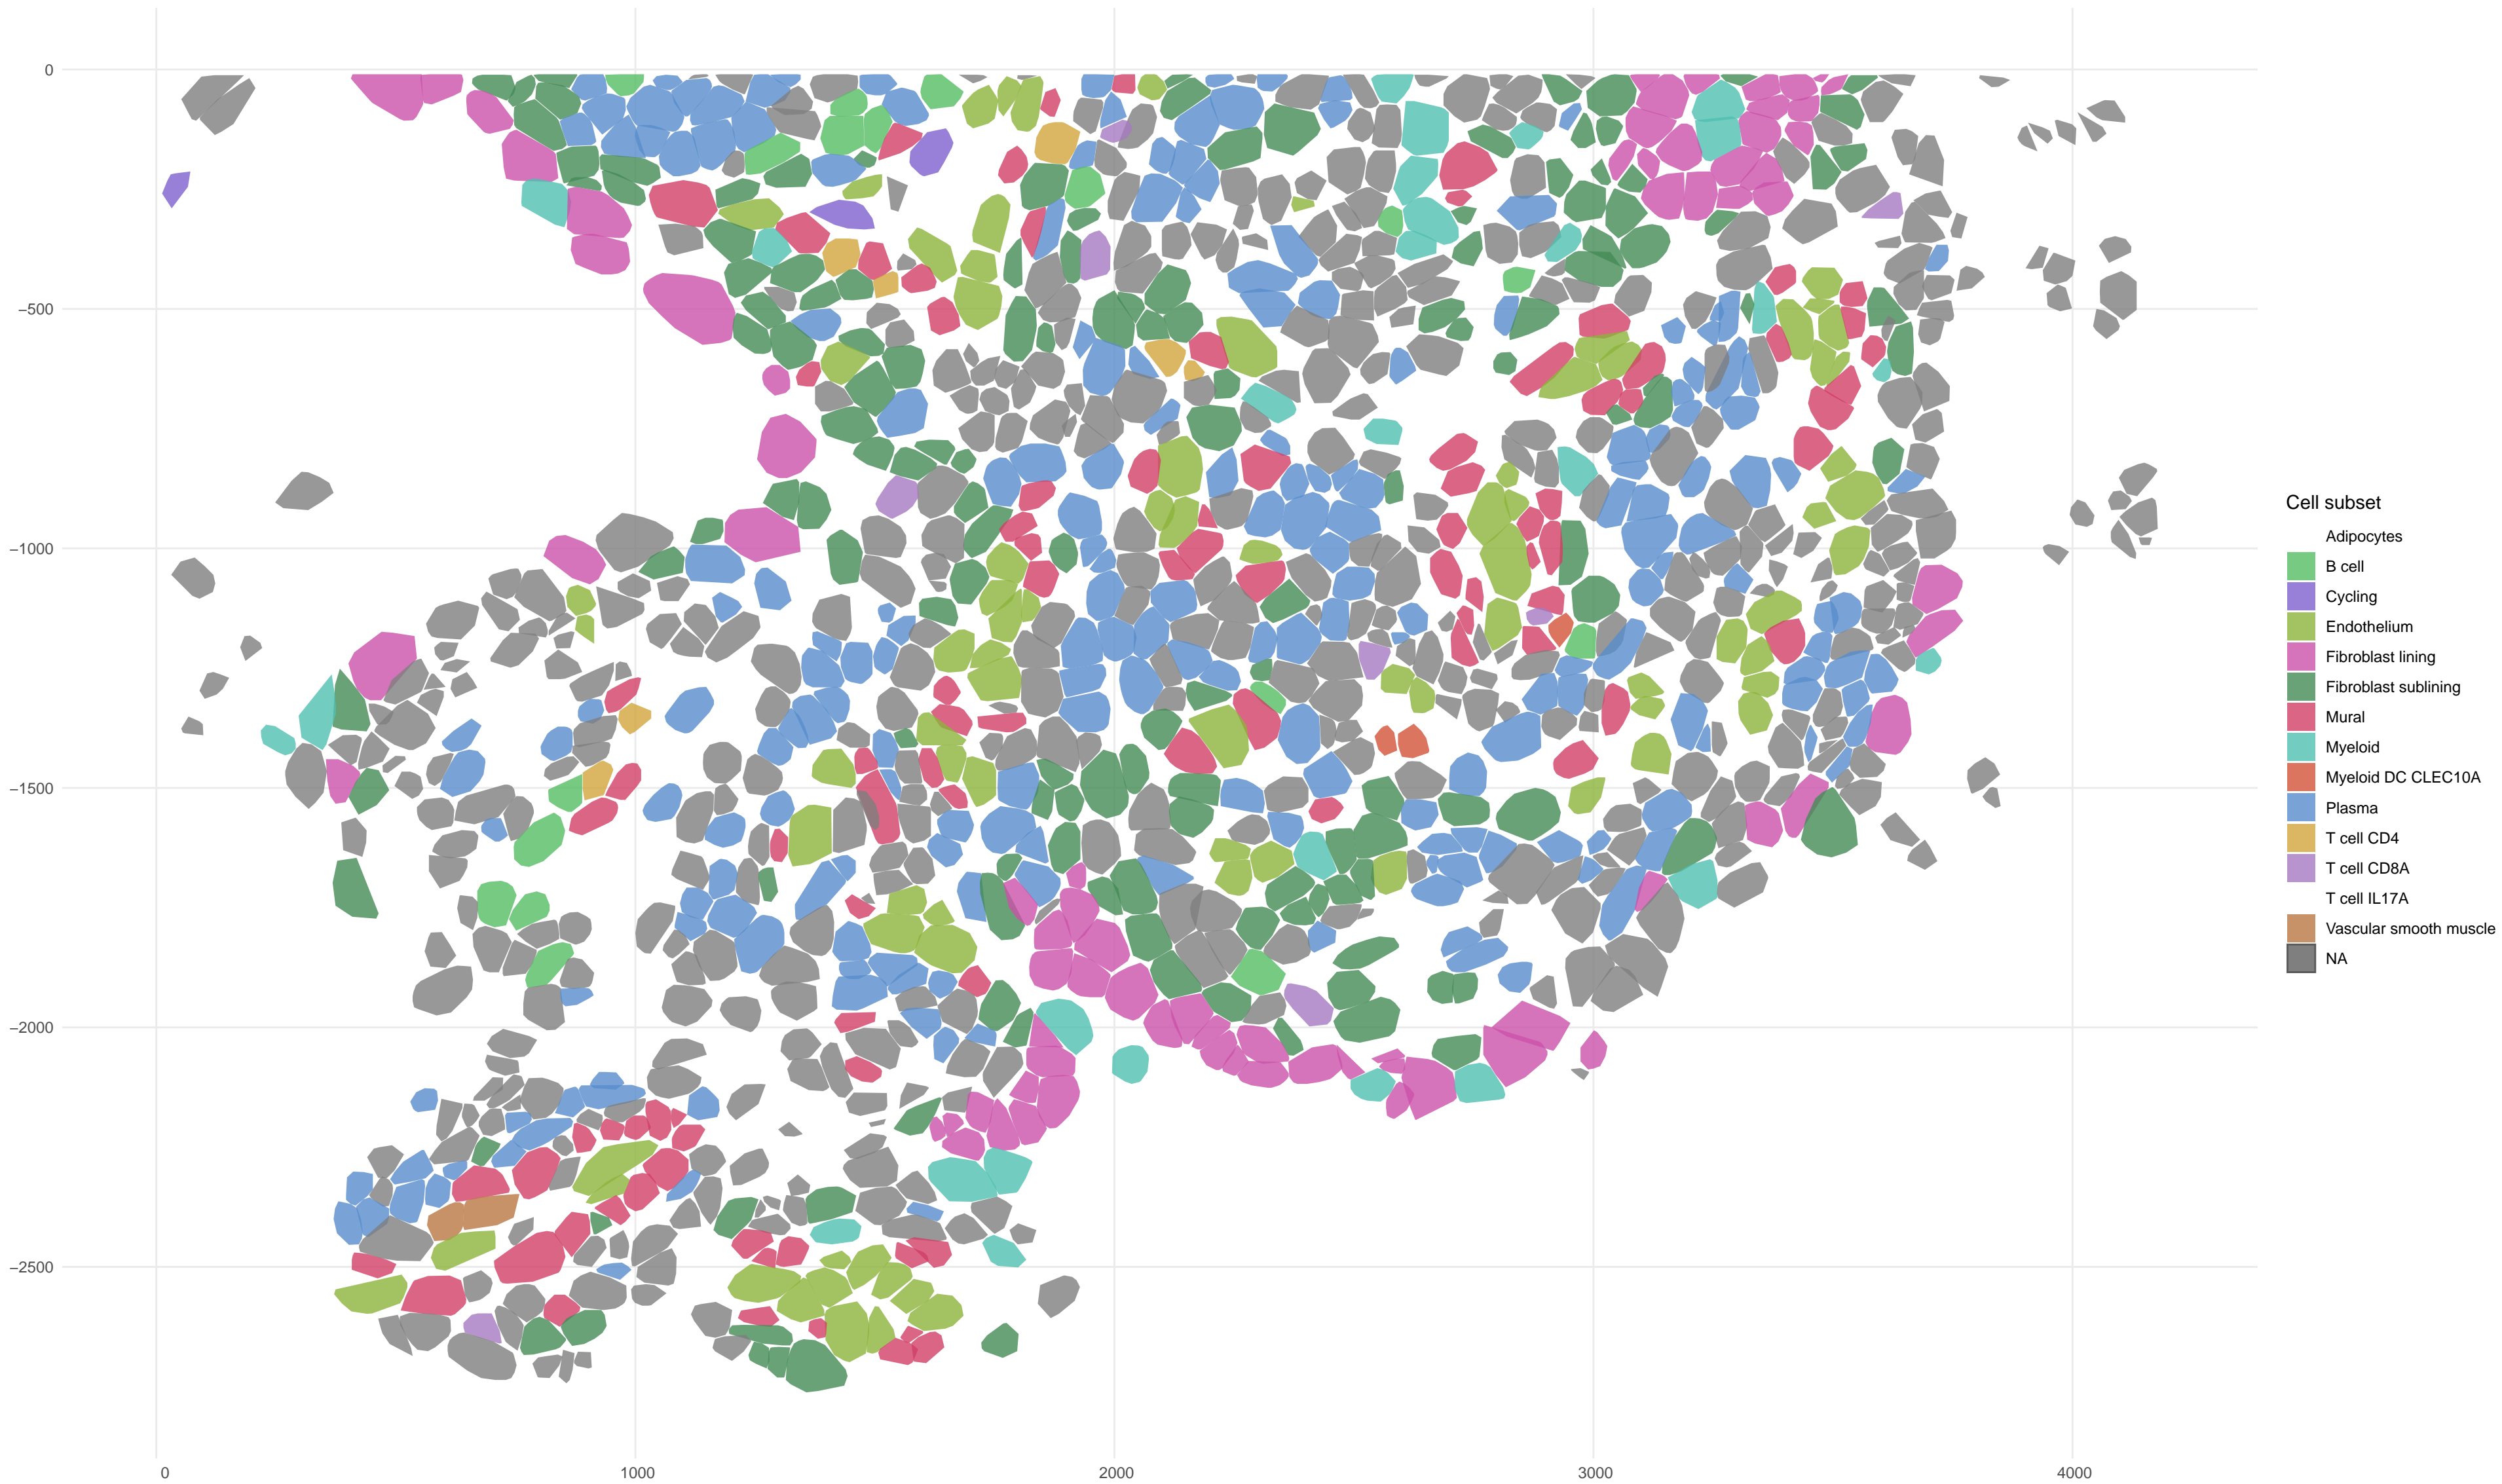



BX438 Post\_Treatment

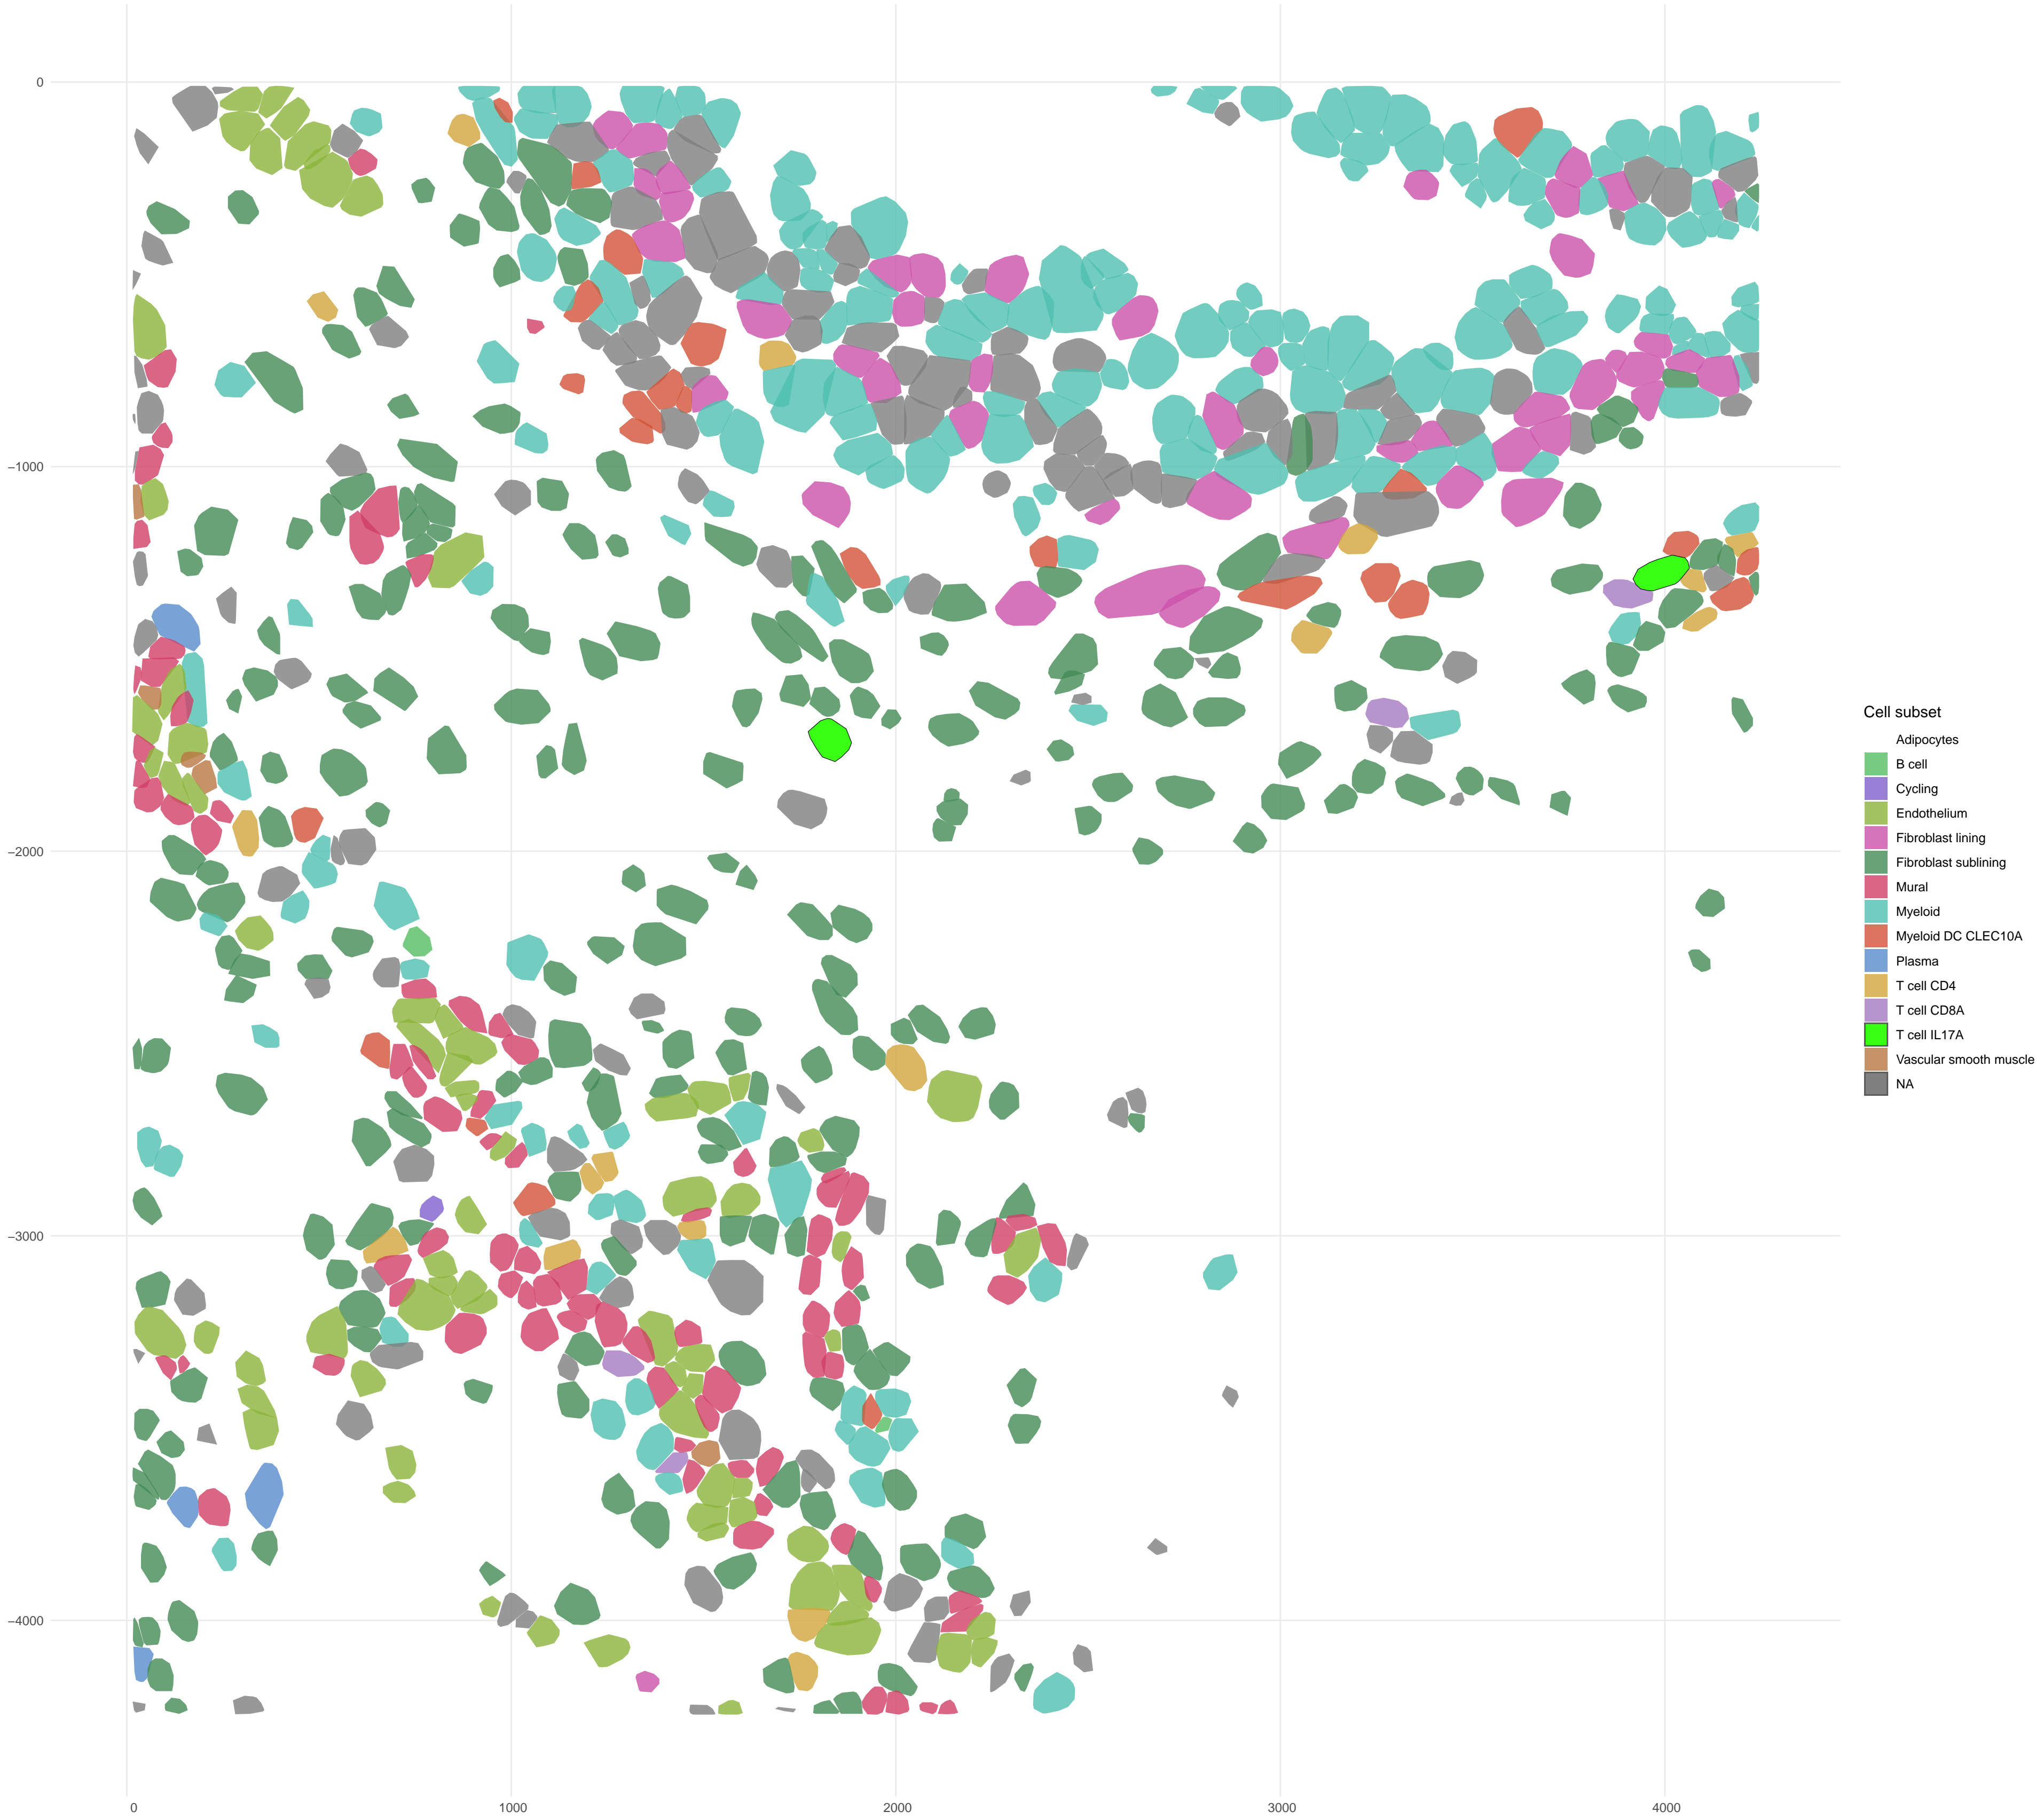

BX420 Baseline

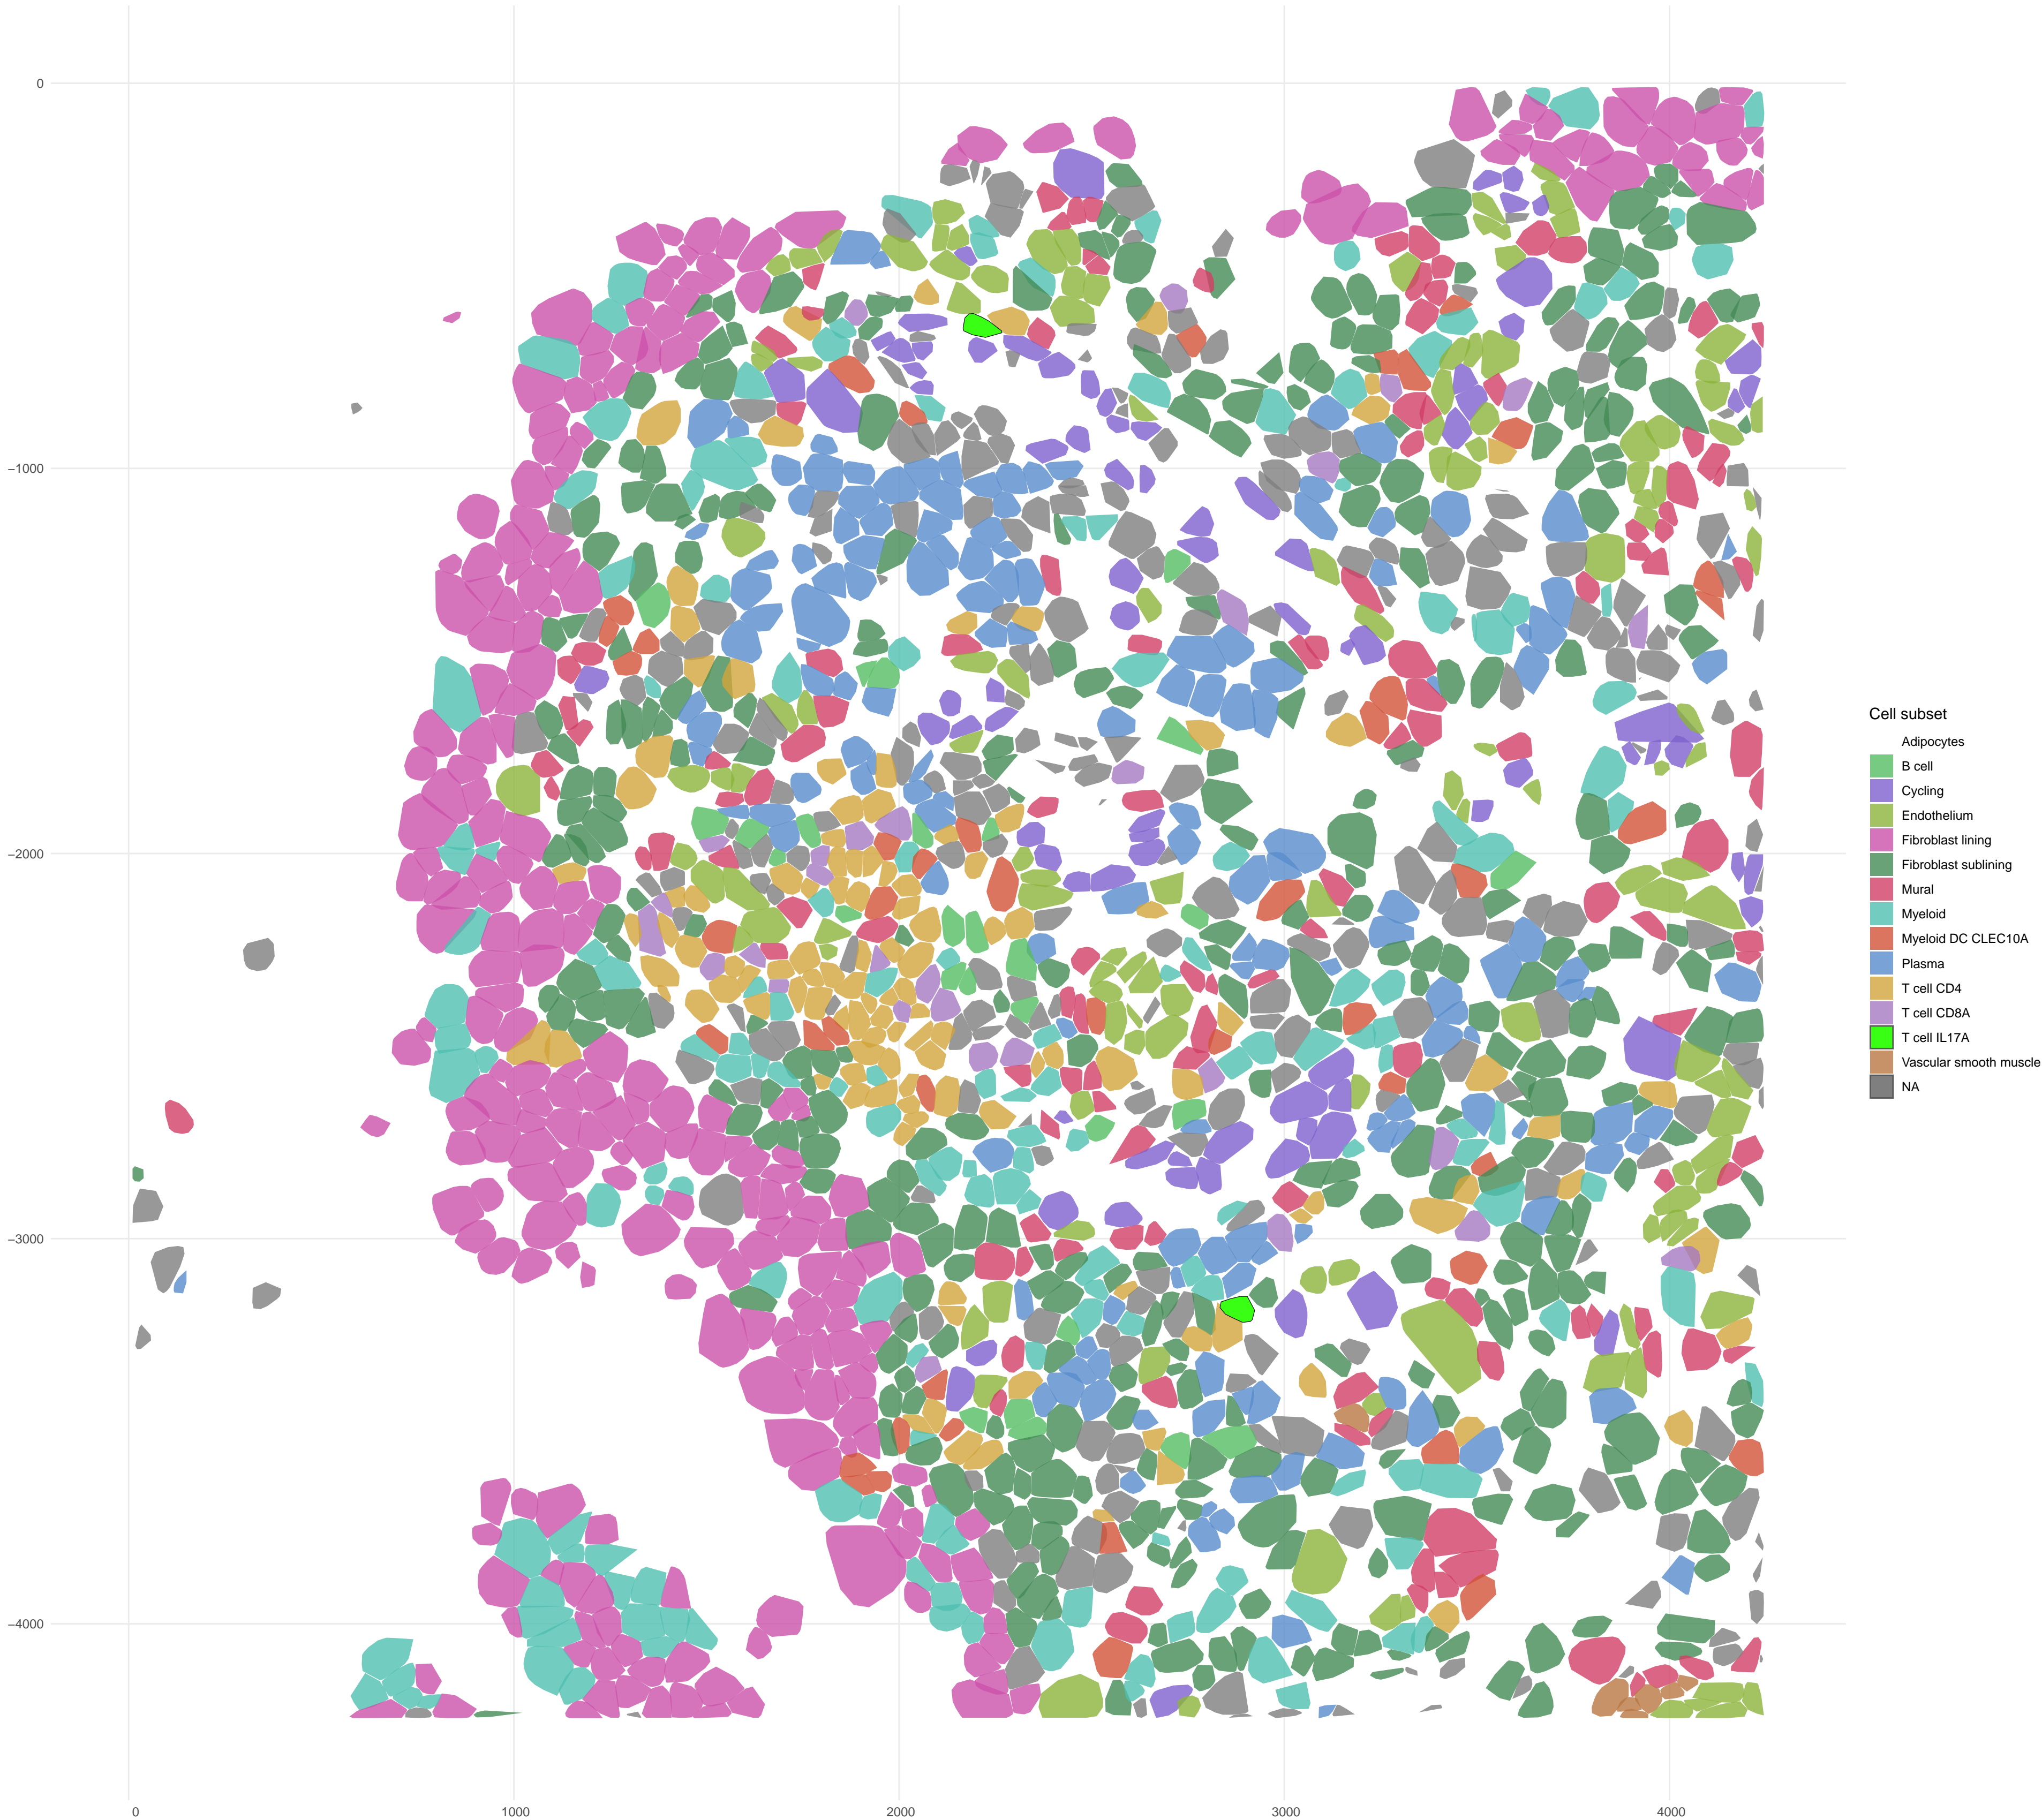



BX438 Post\_Treatment

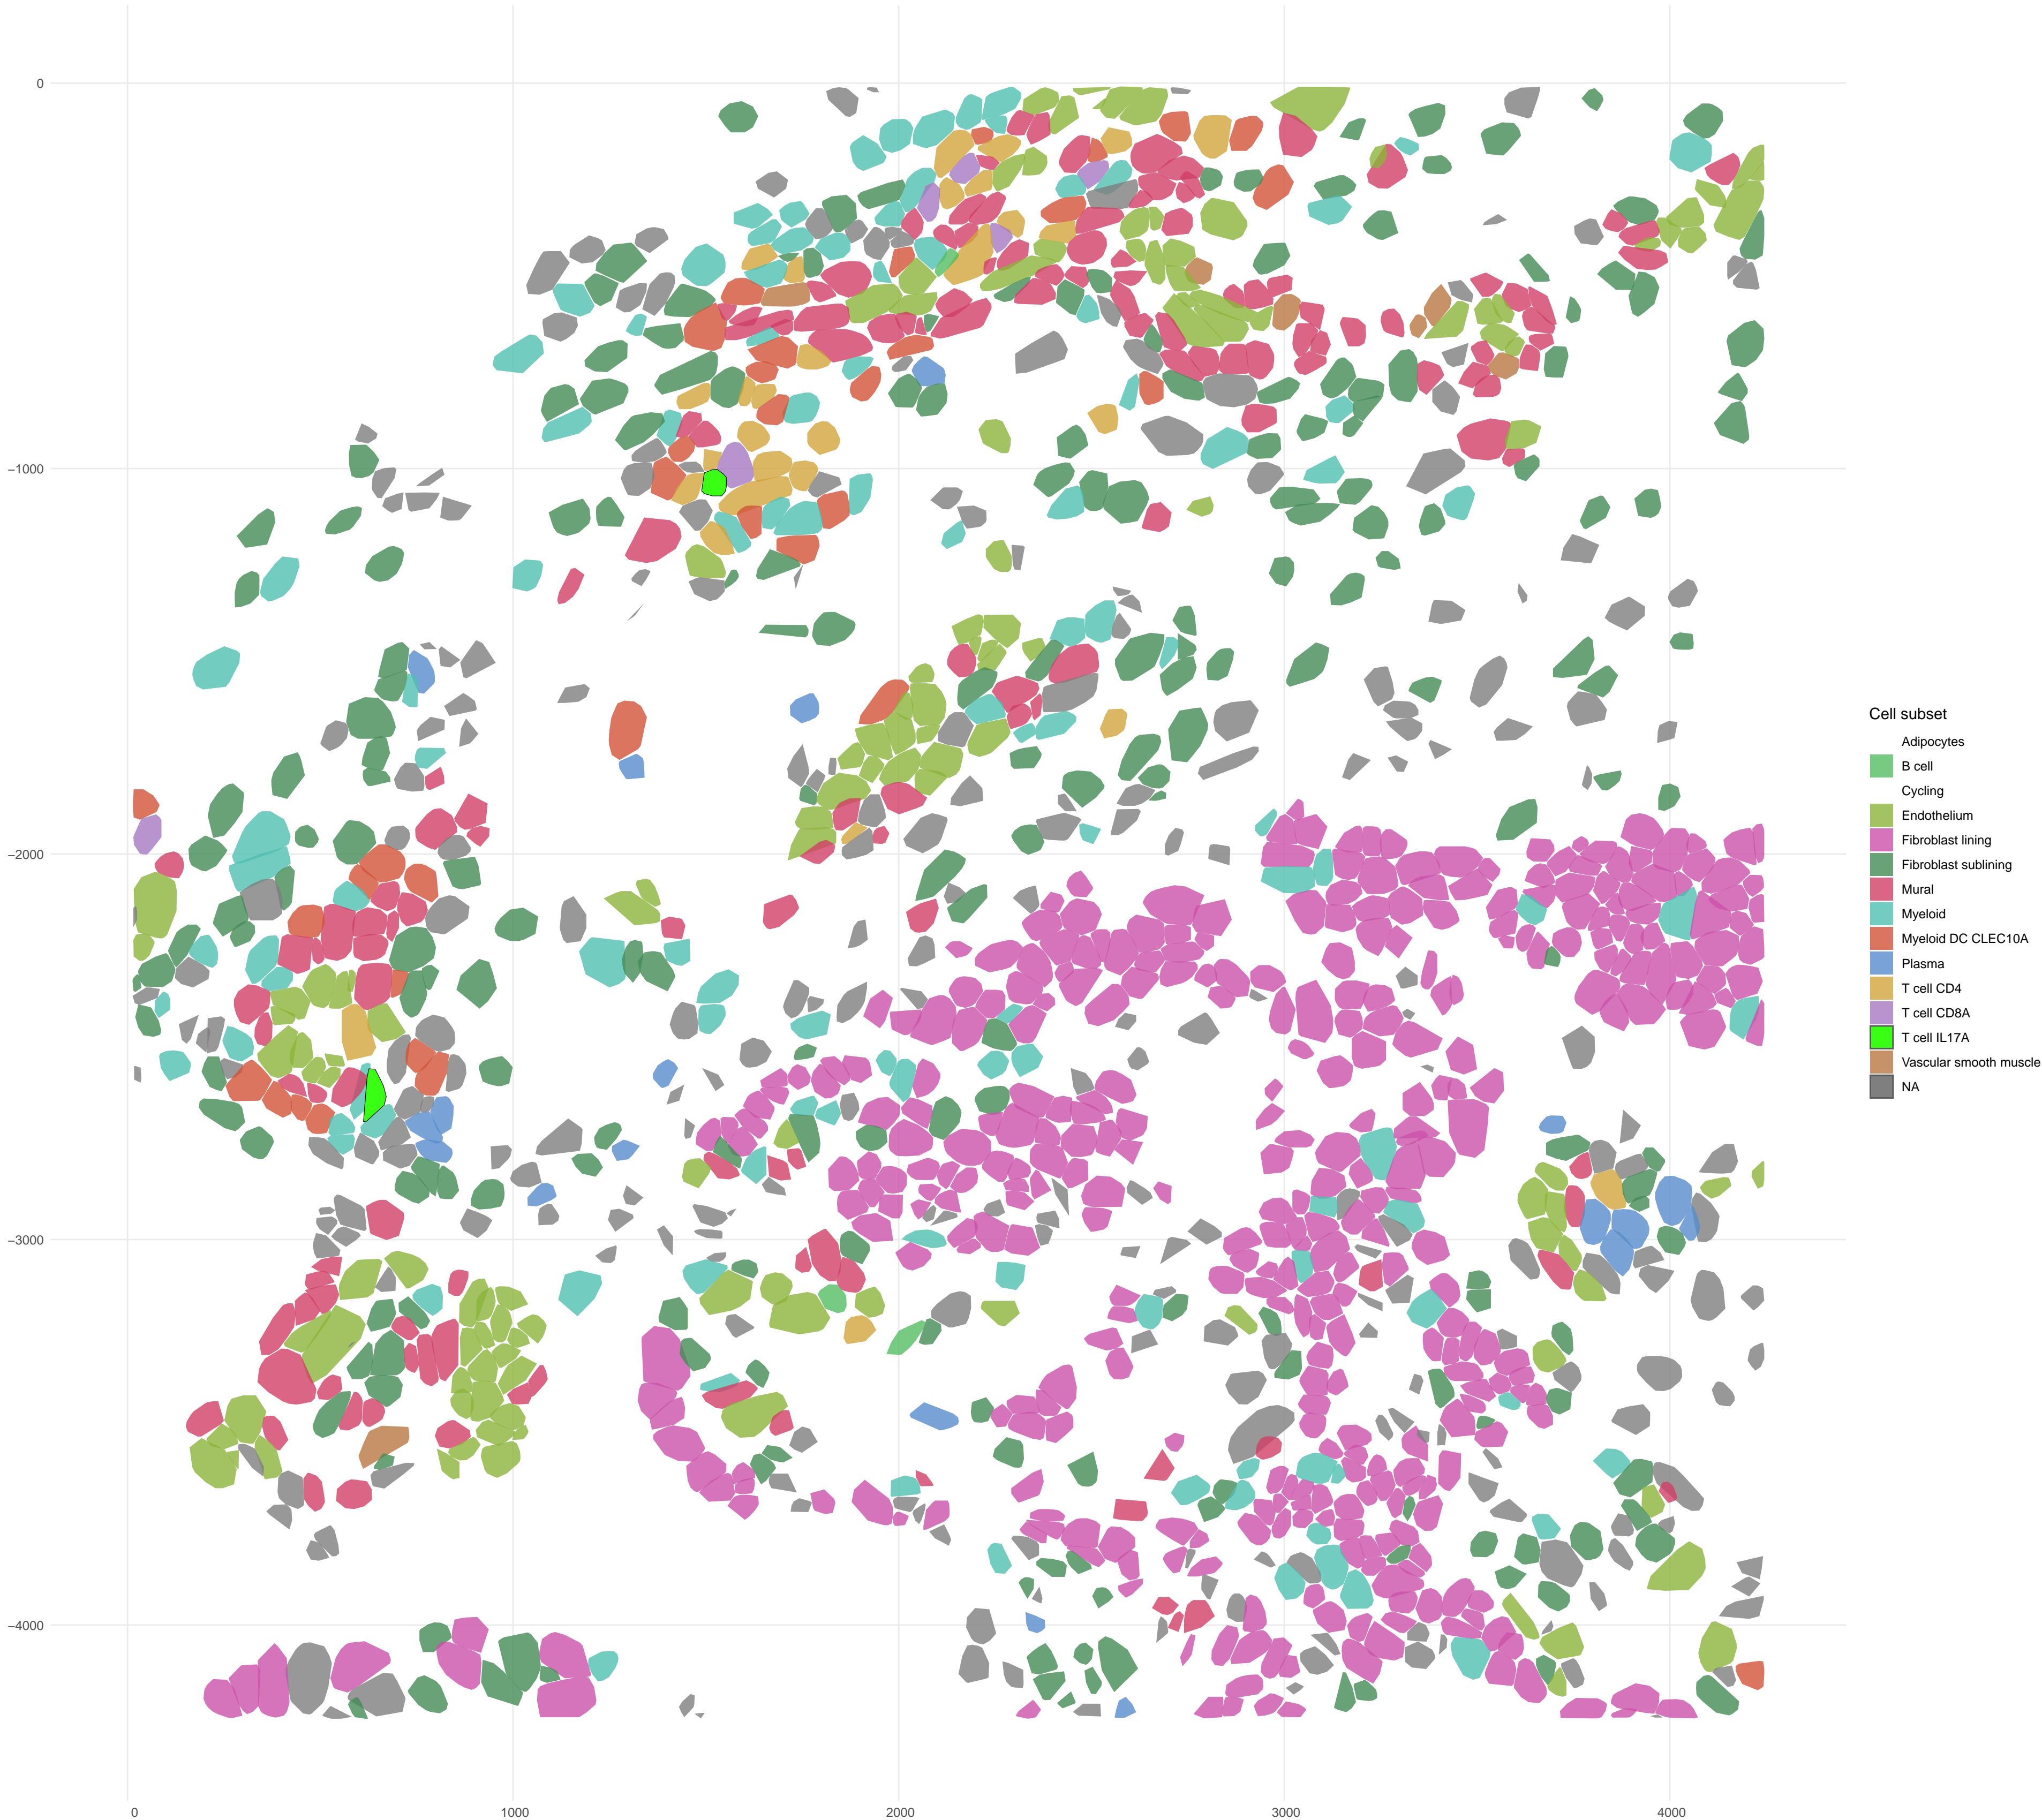

BX420 Baseline

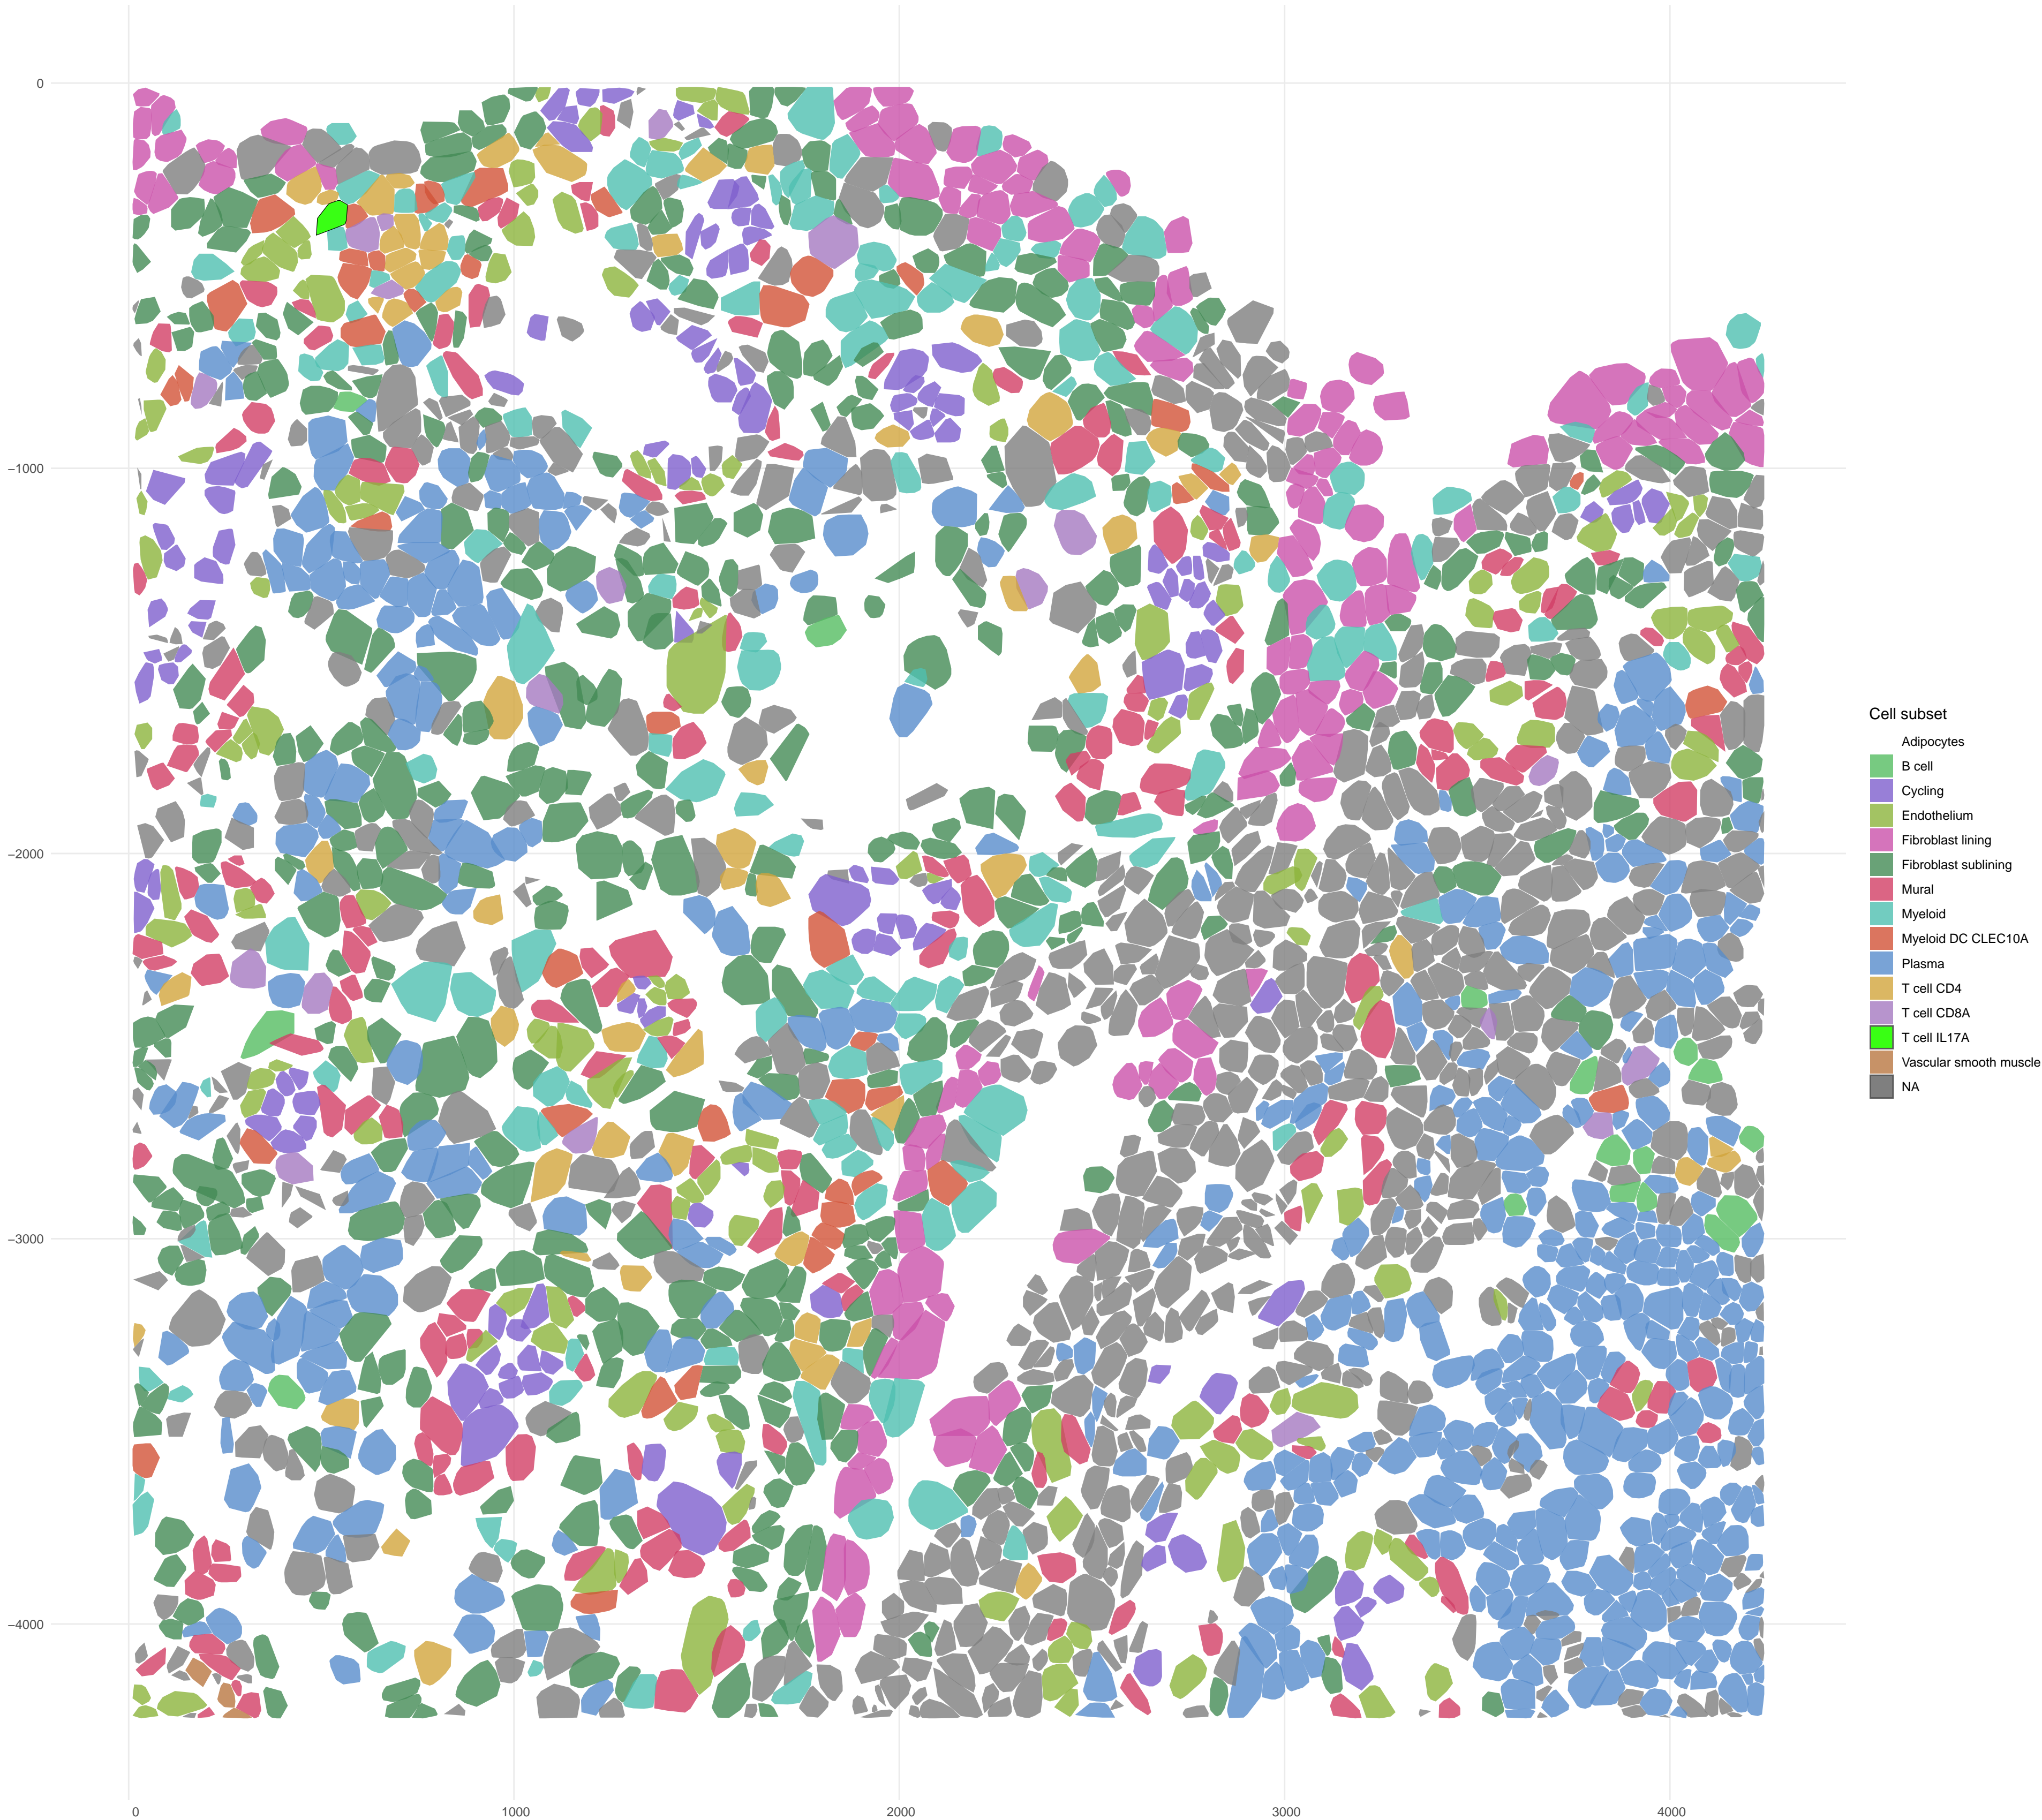



BX438 Post\_Treatment

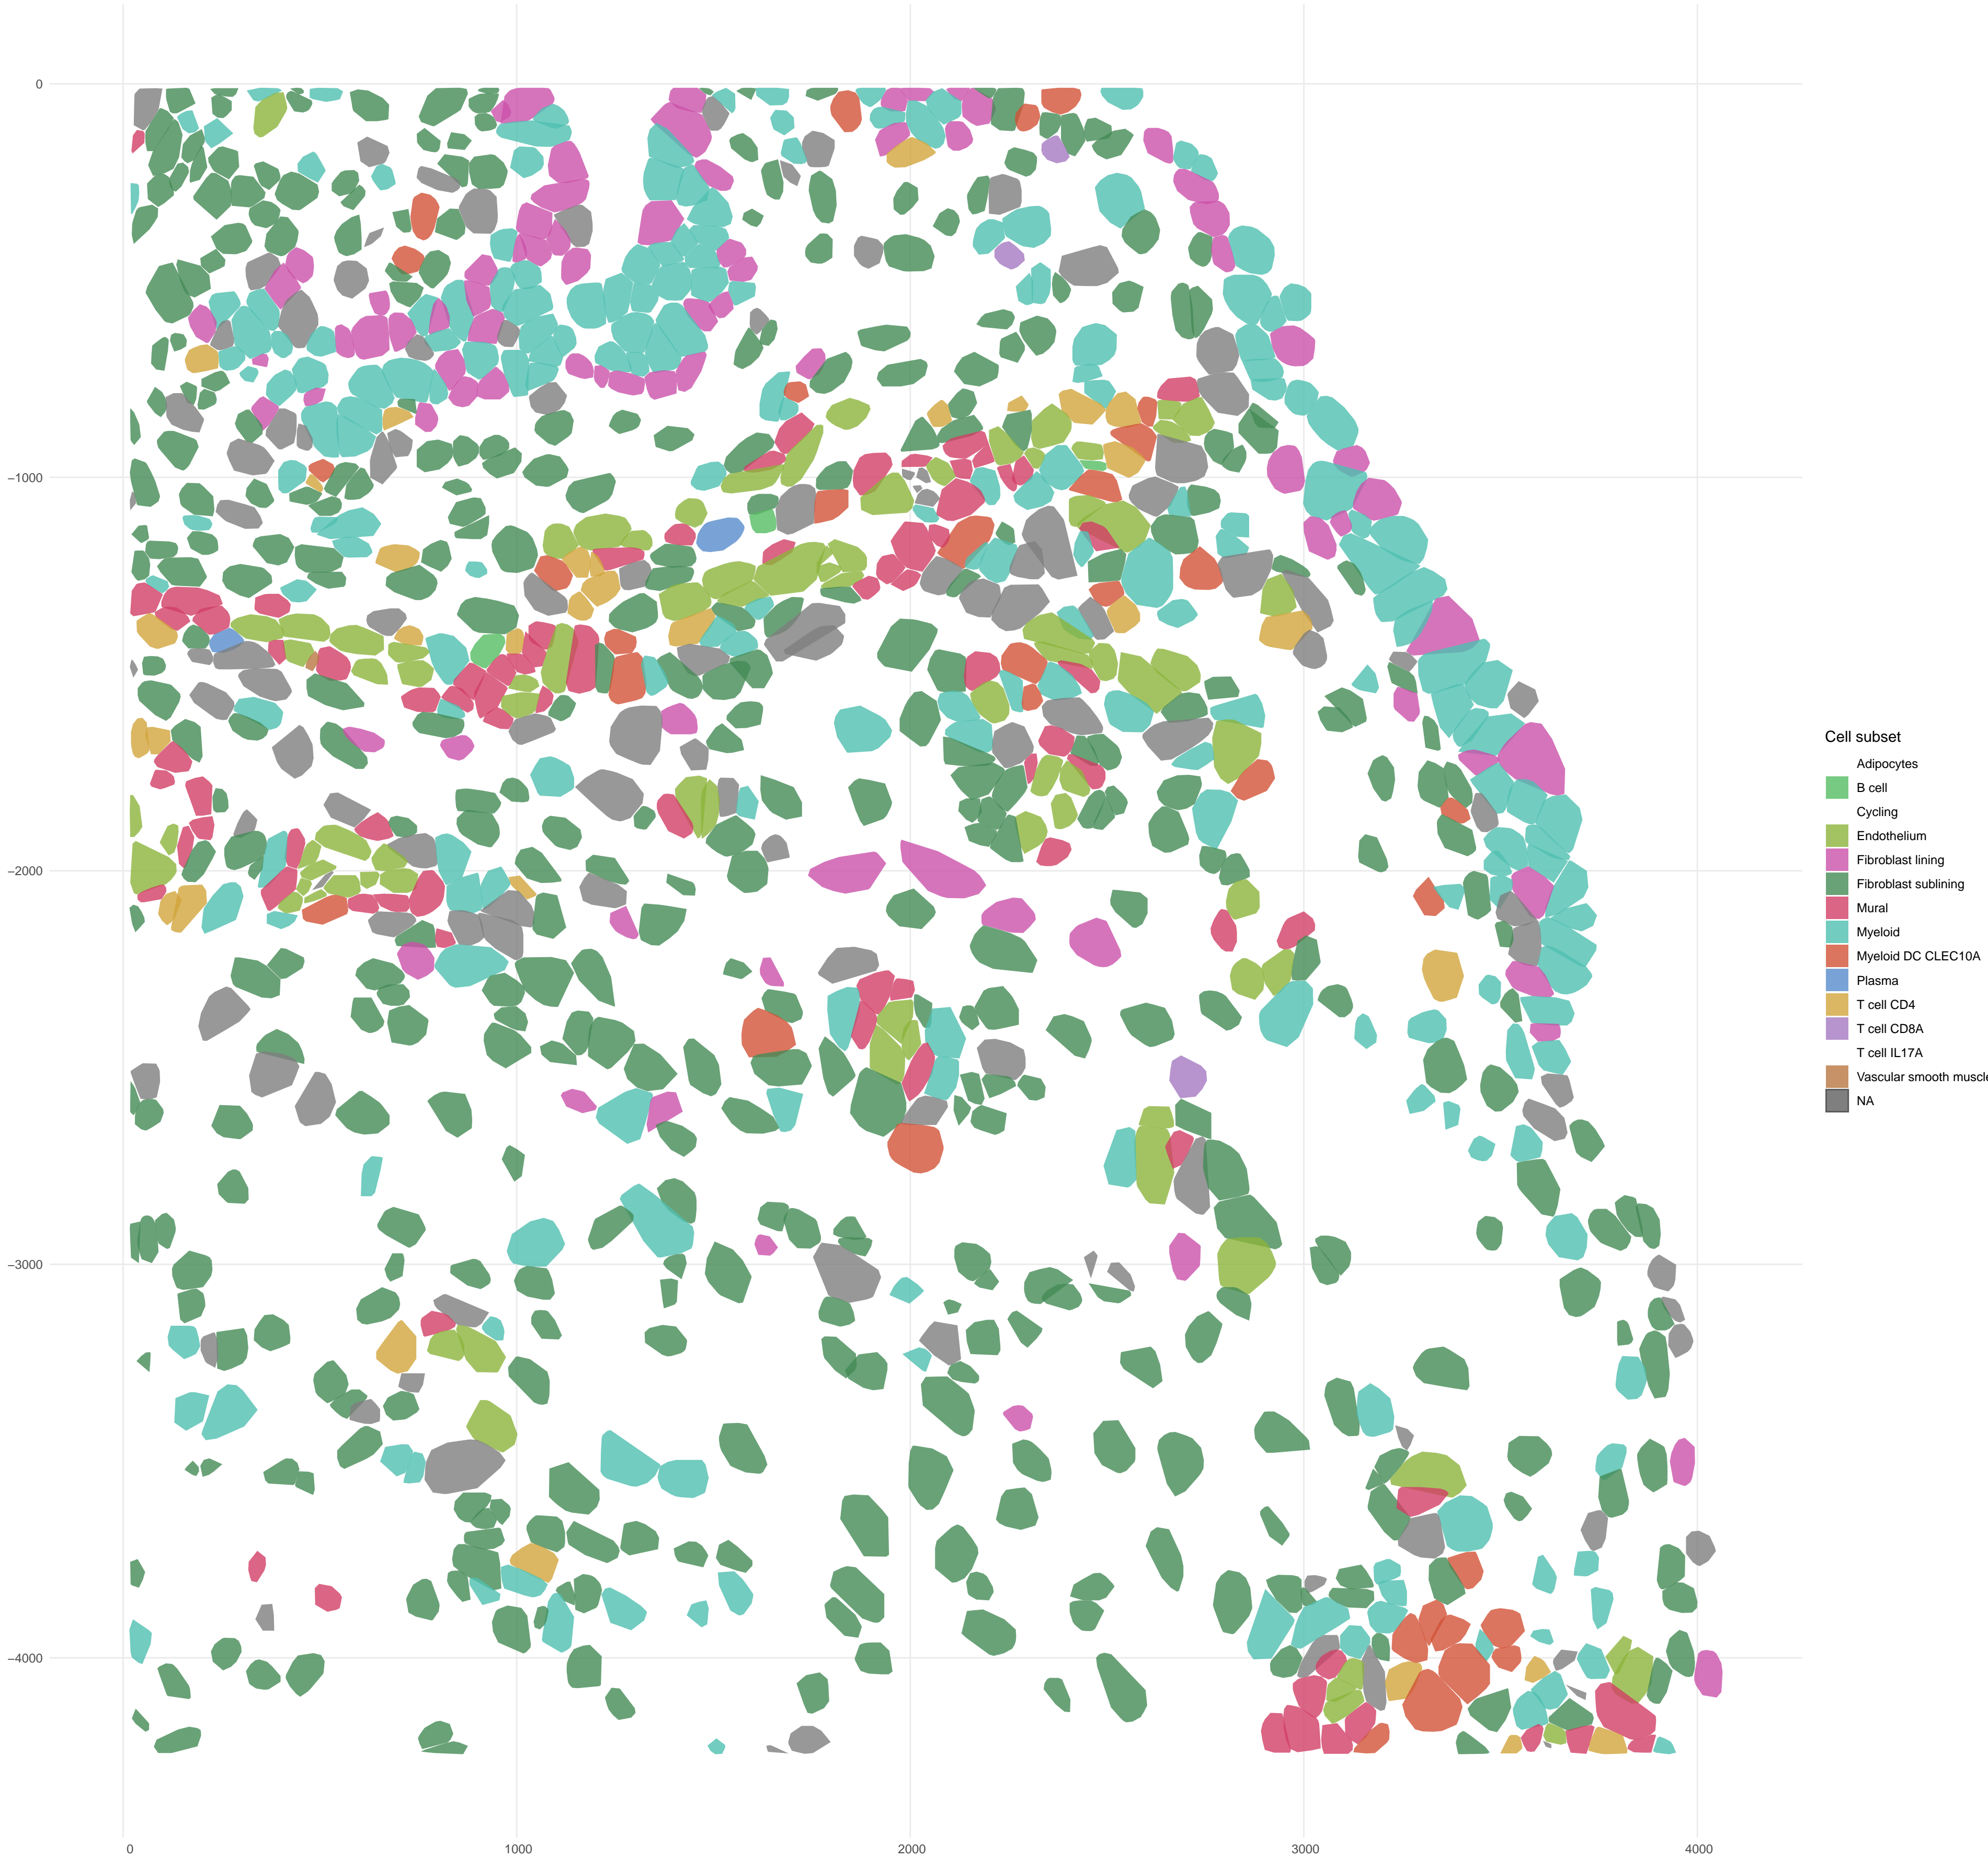

BX420 Baseline

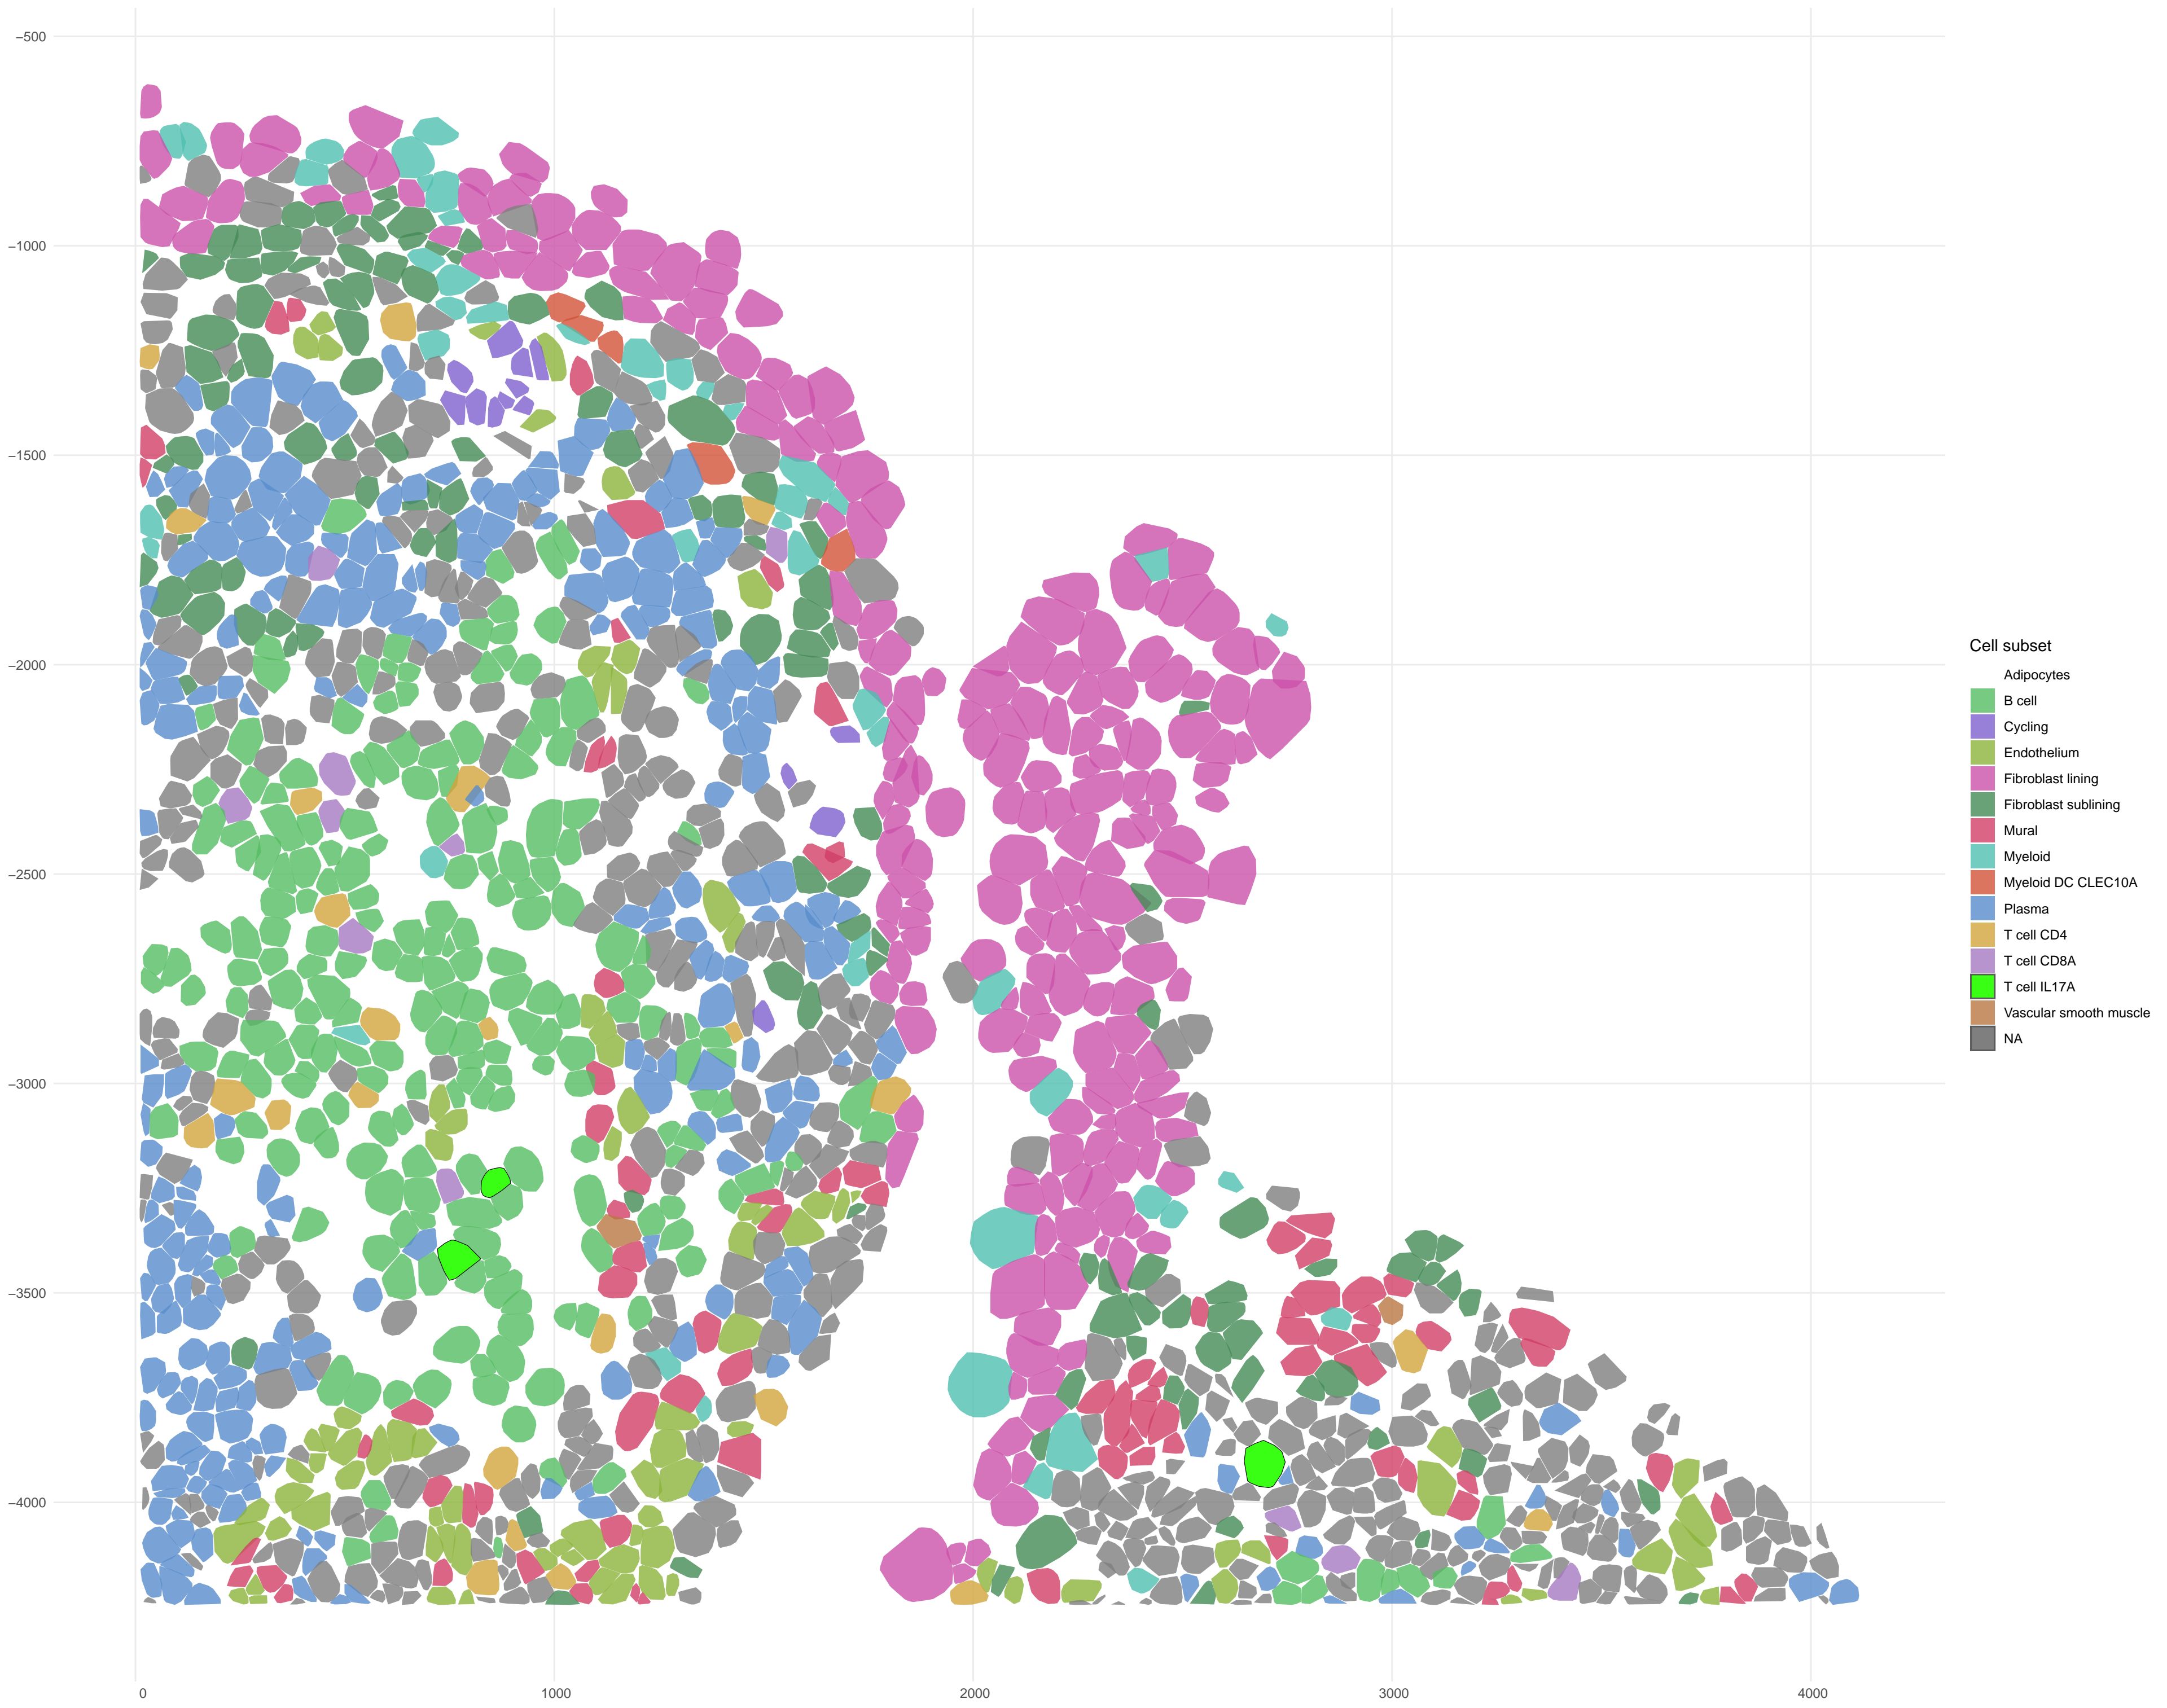



BX438 Post\_Treatment

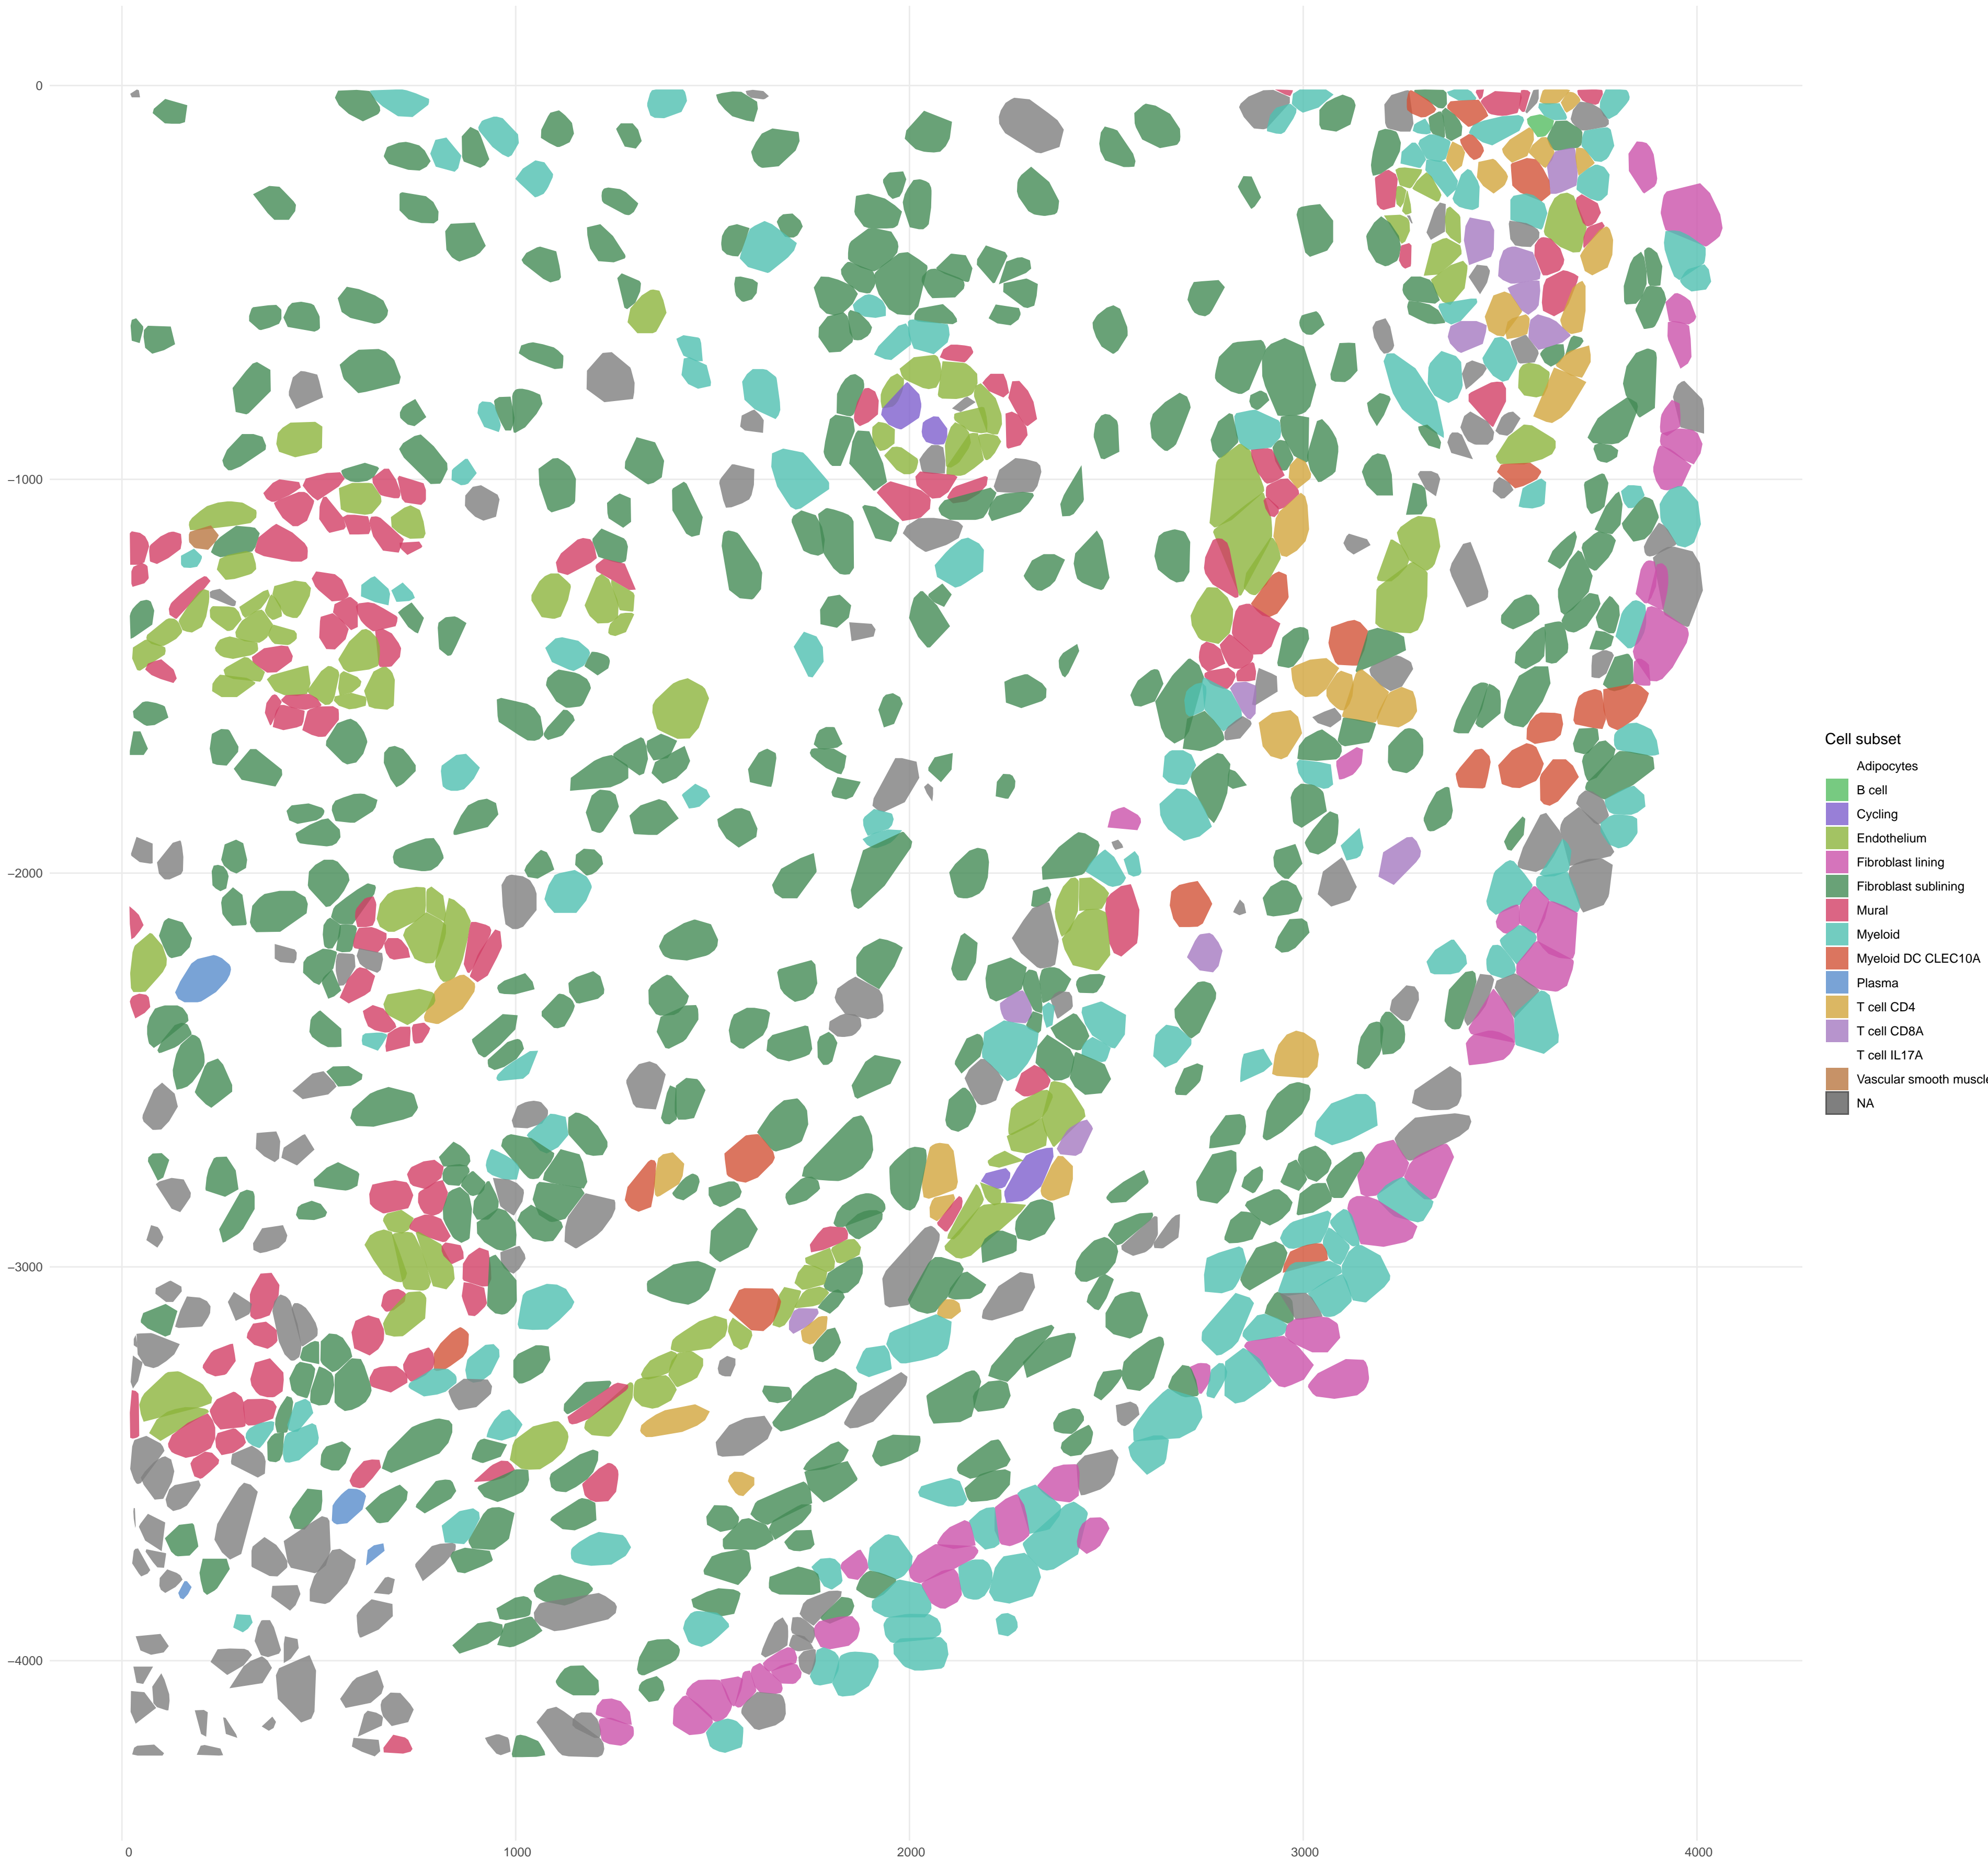

BX420 Baseline

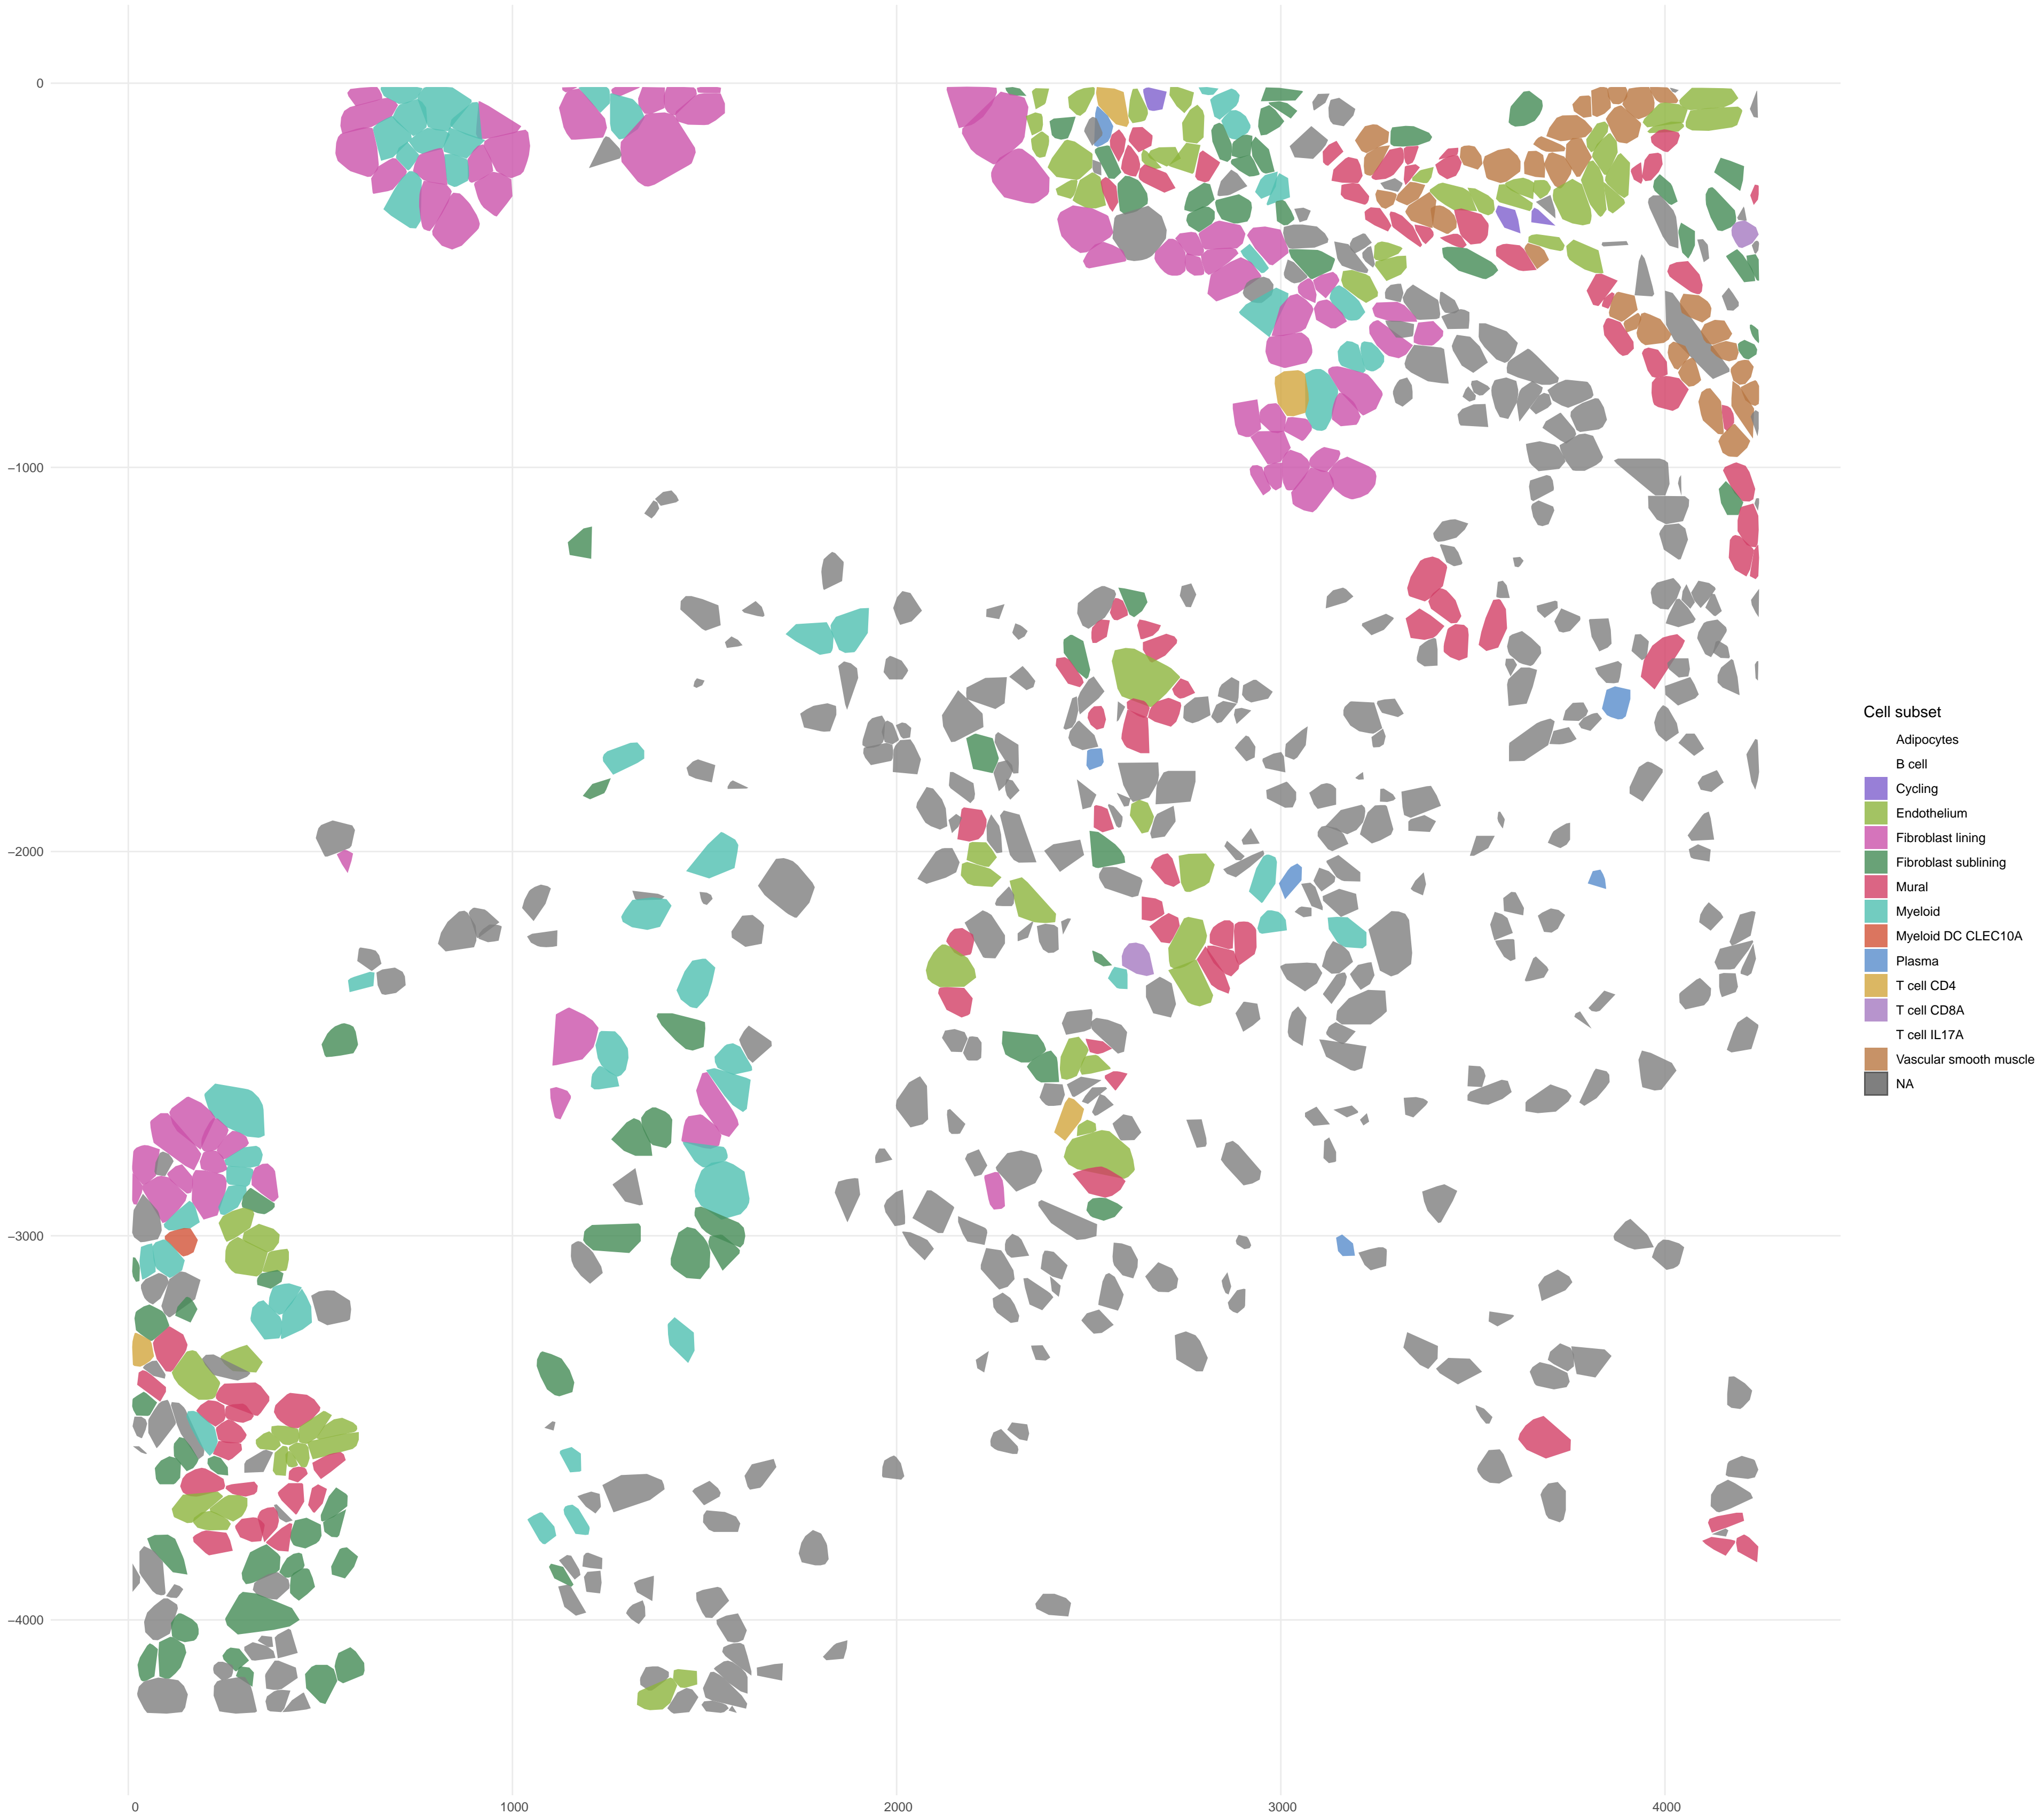



BX438 Post\_Treatment

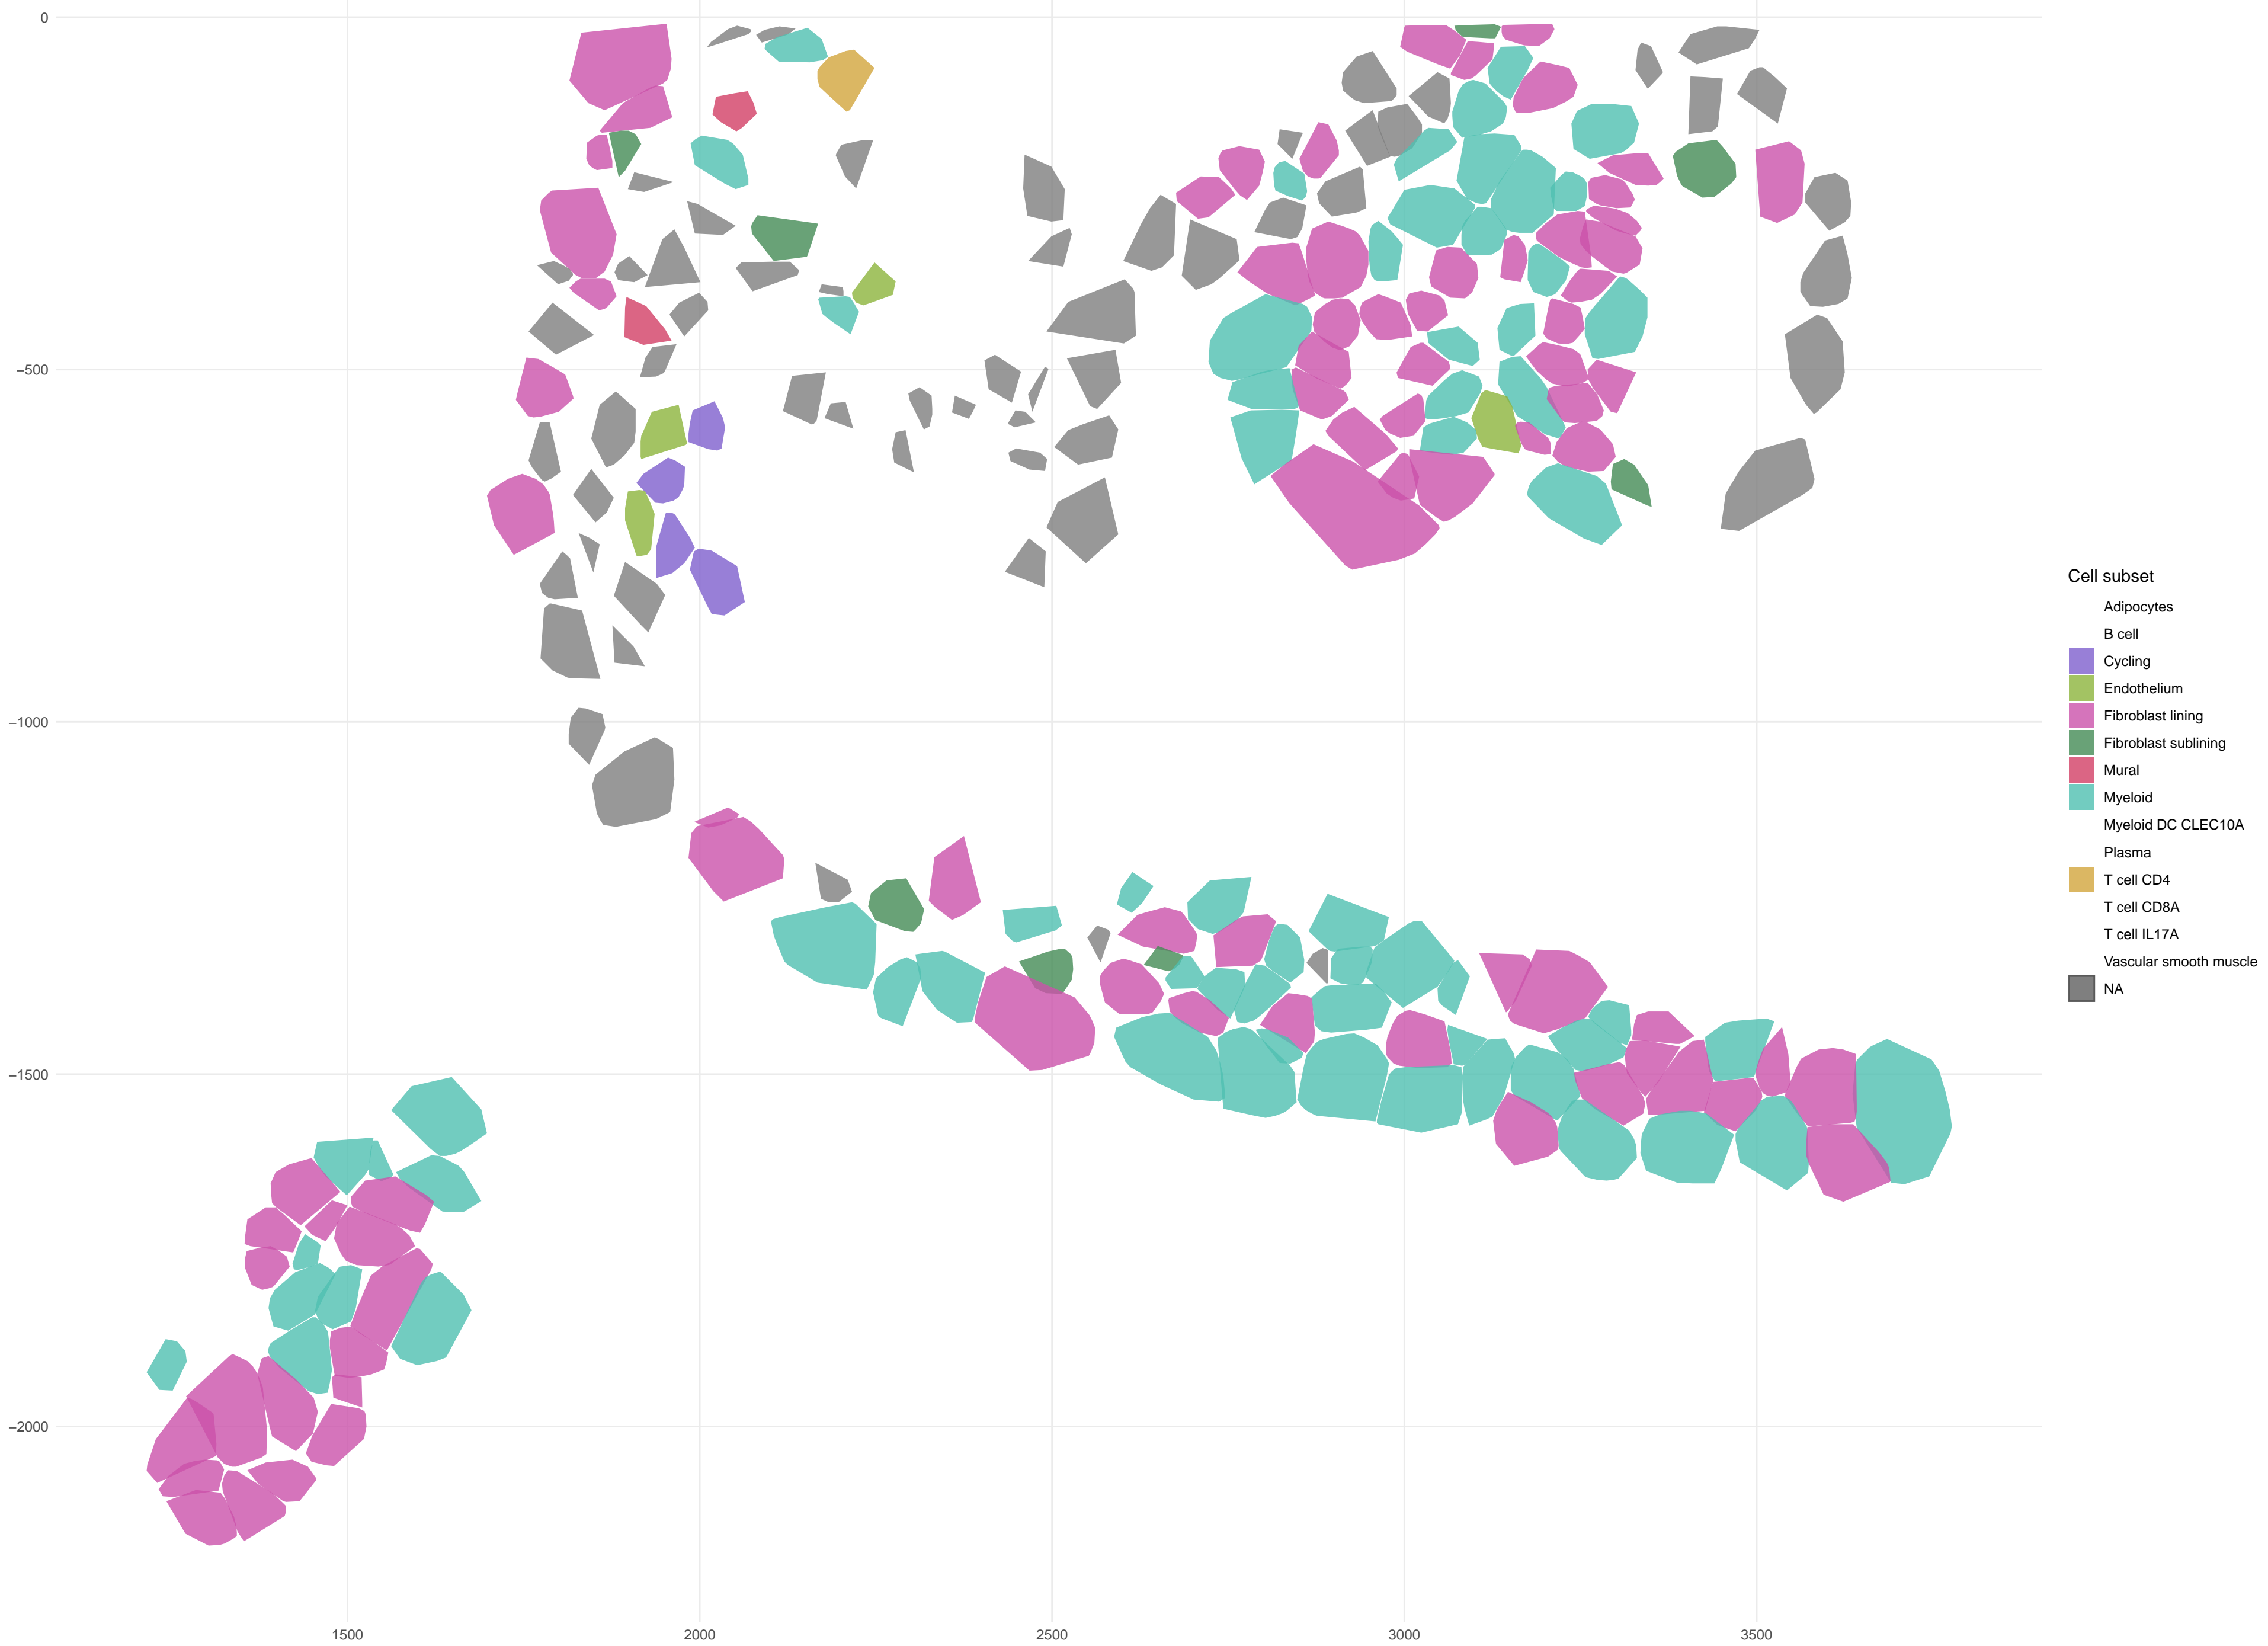

BX420 Baseline

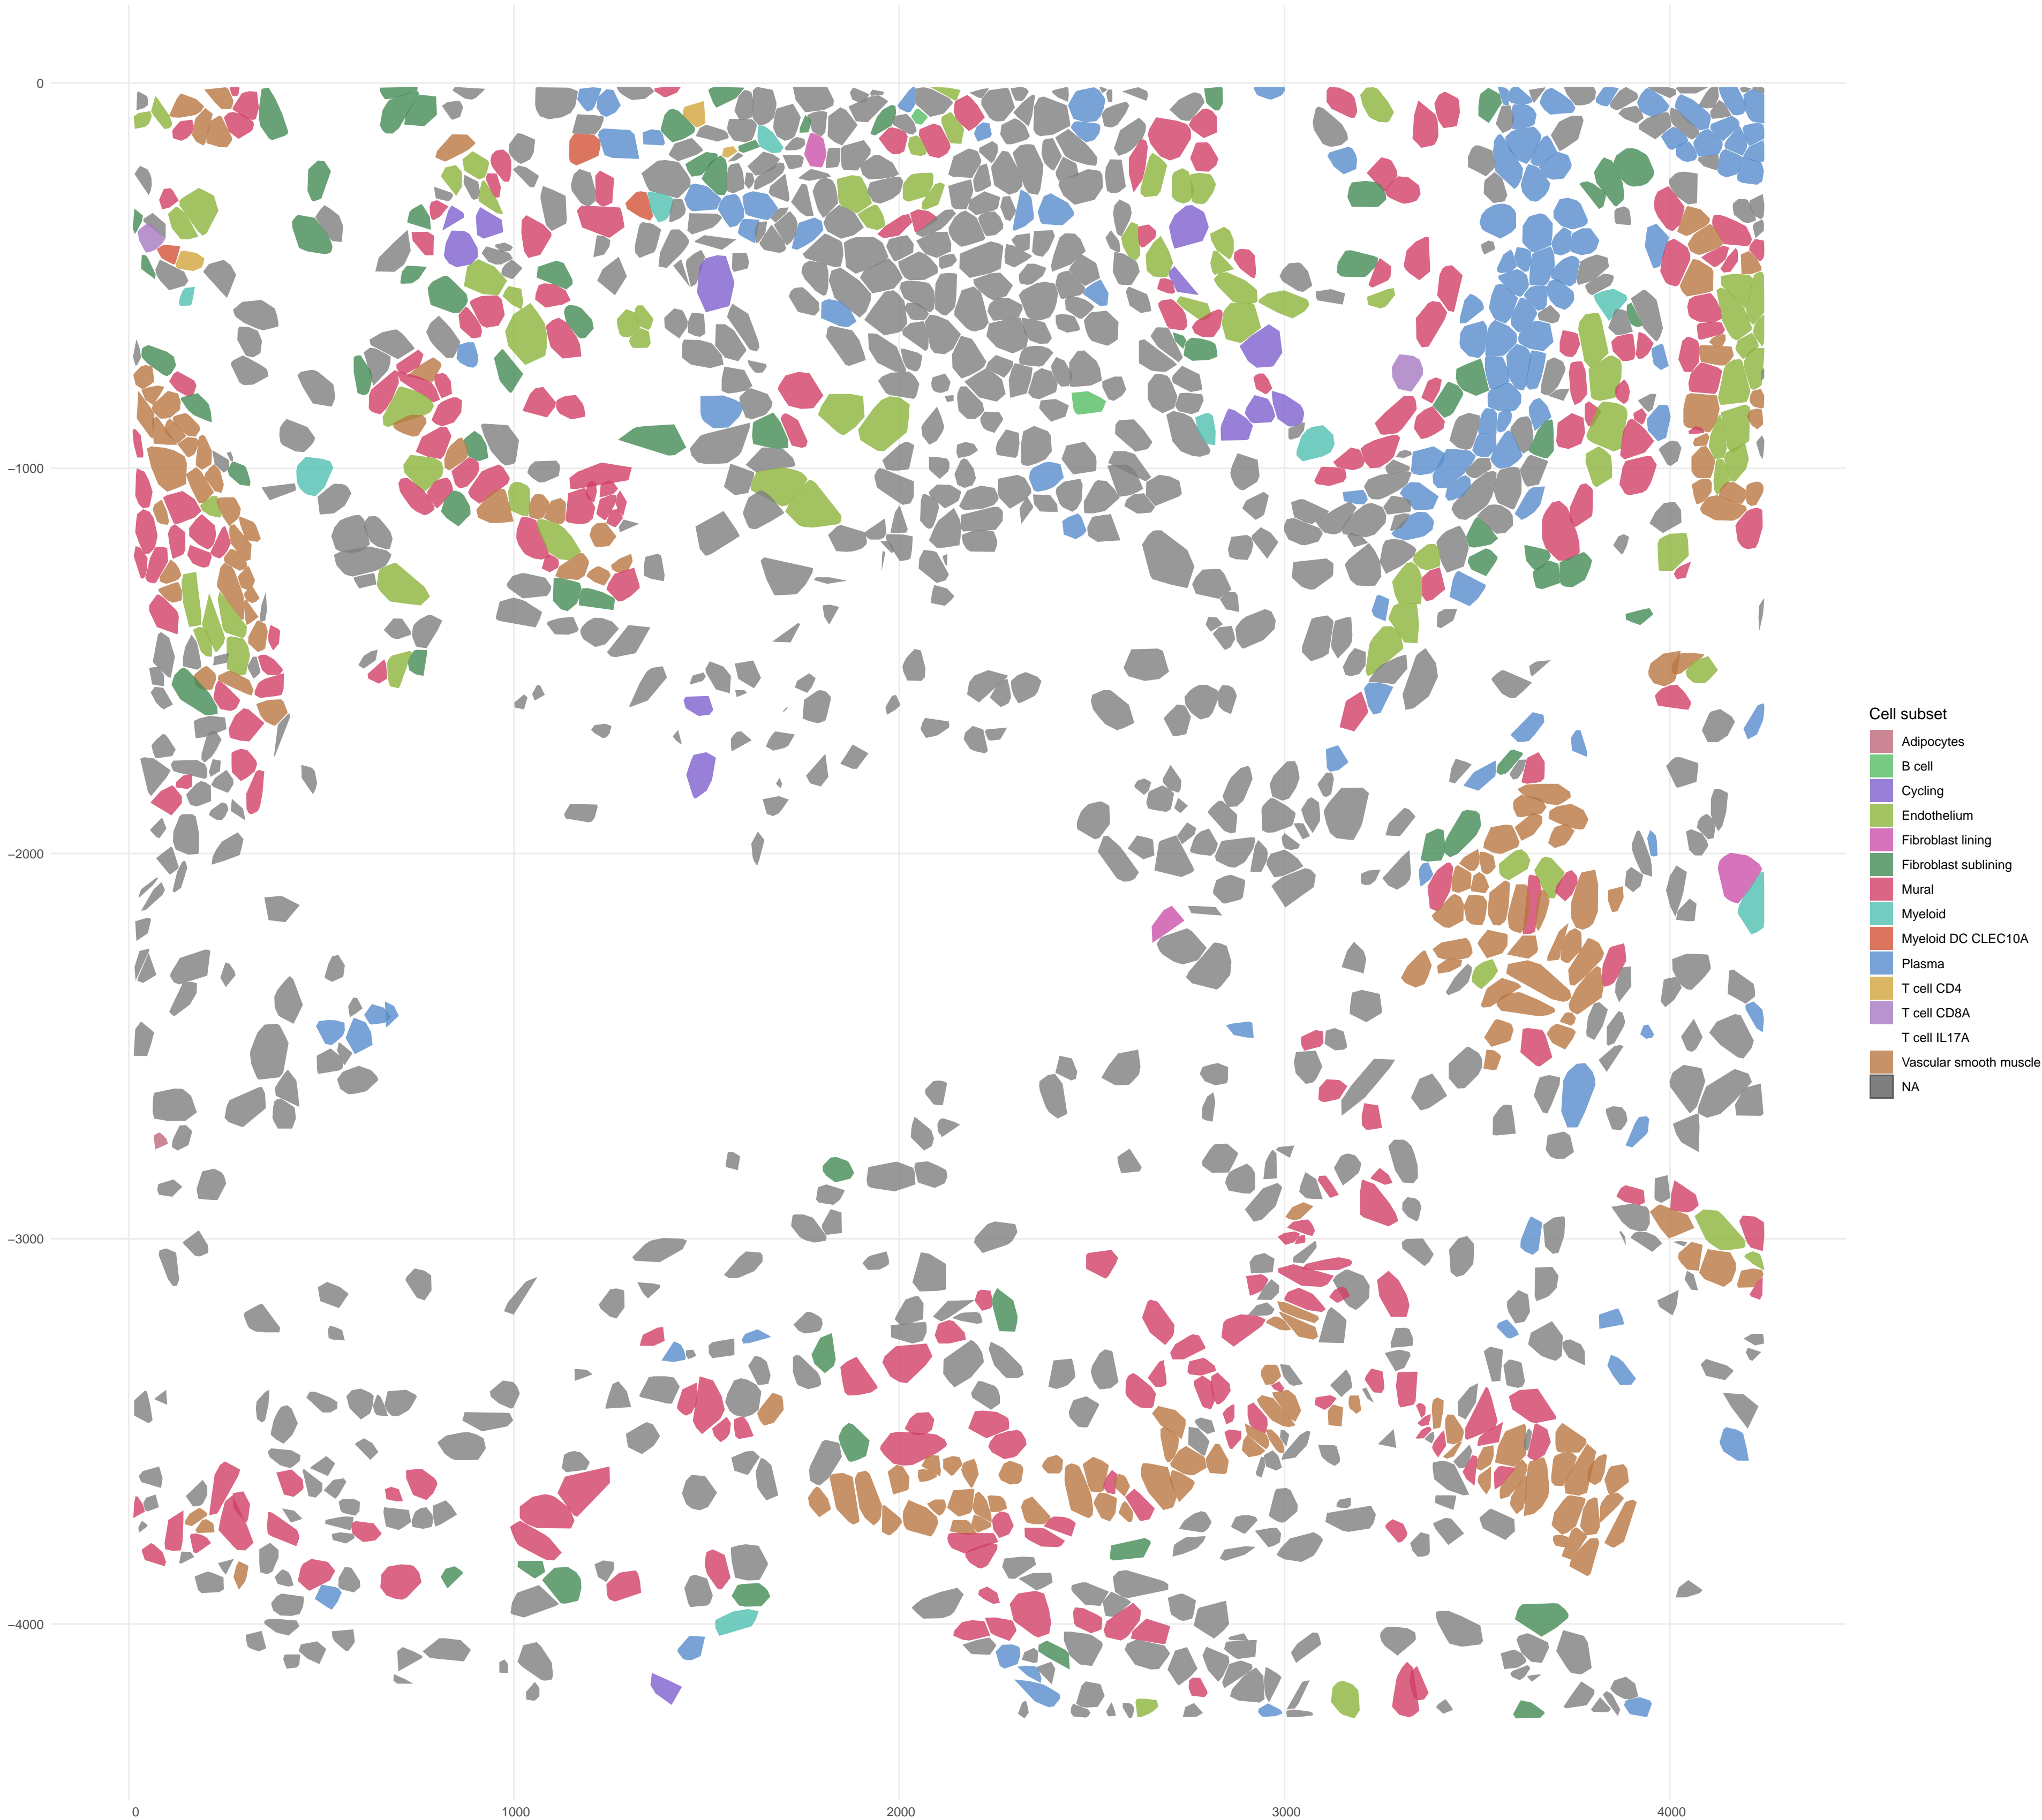



BX438 Post\_Treatment

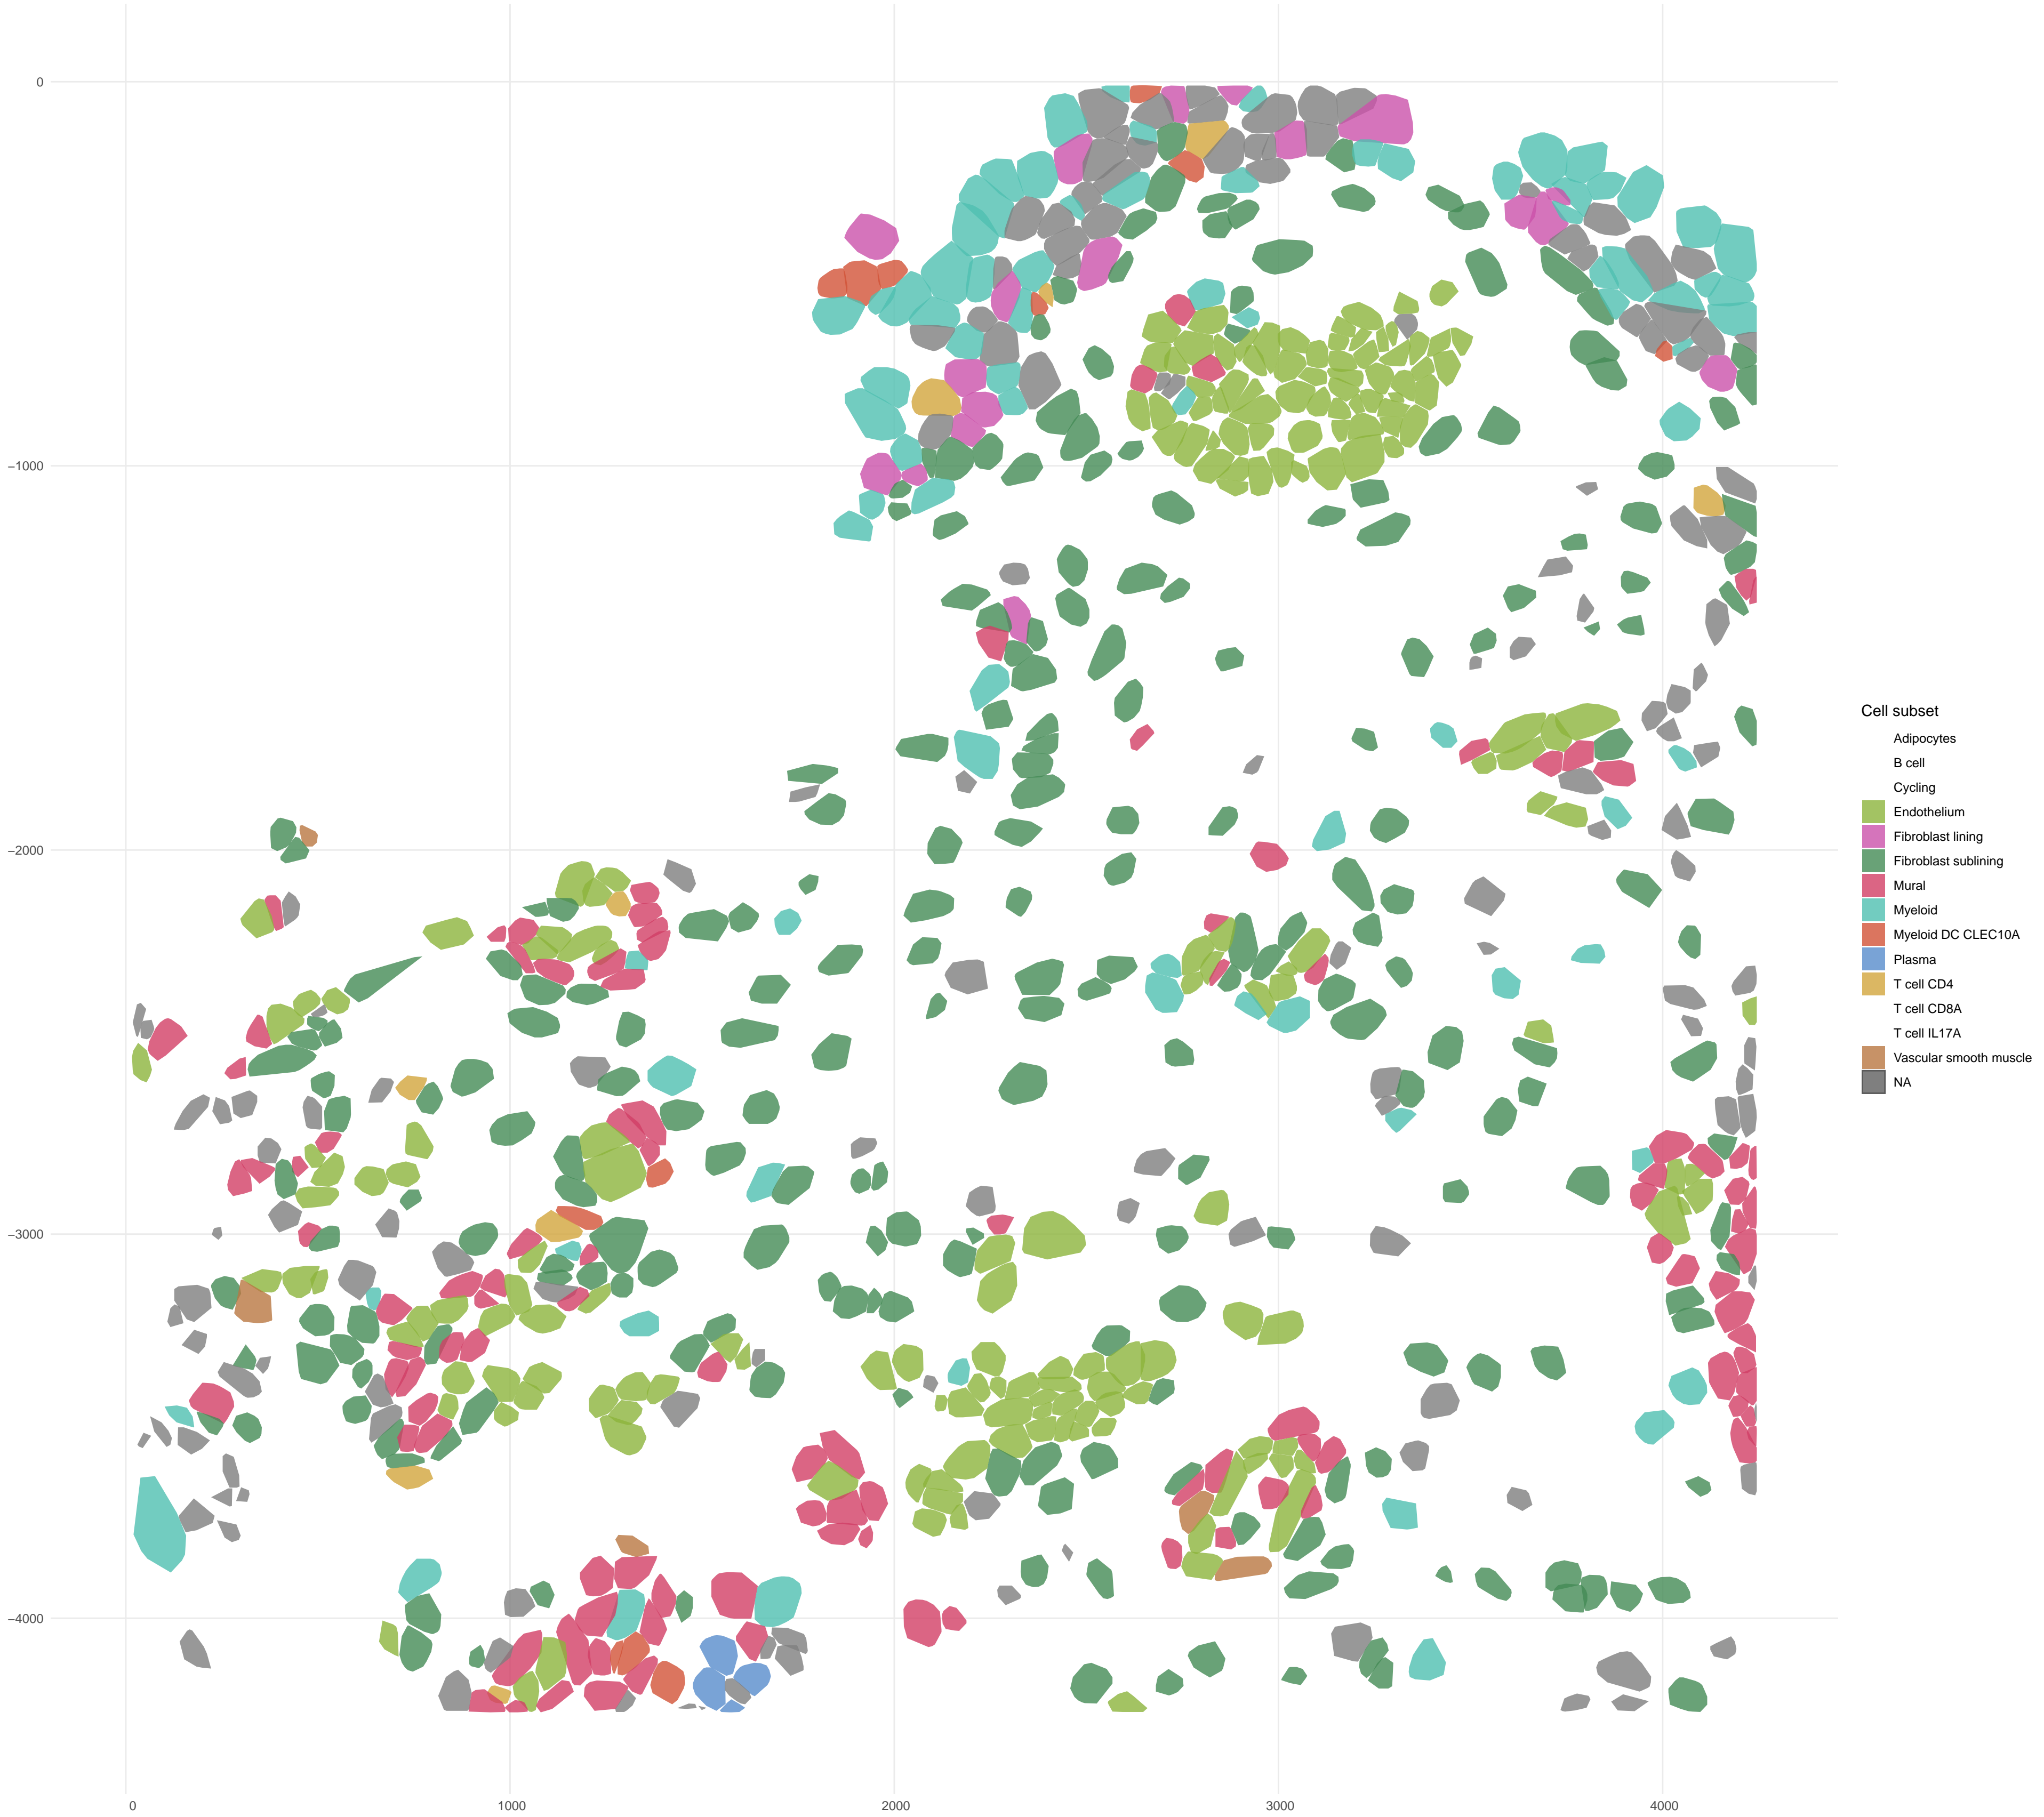

BX420 Baseline

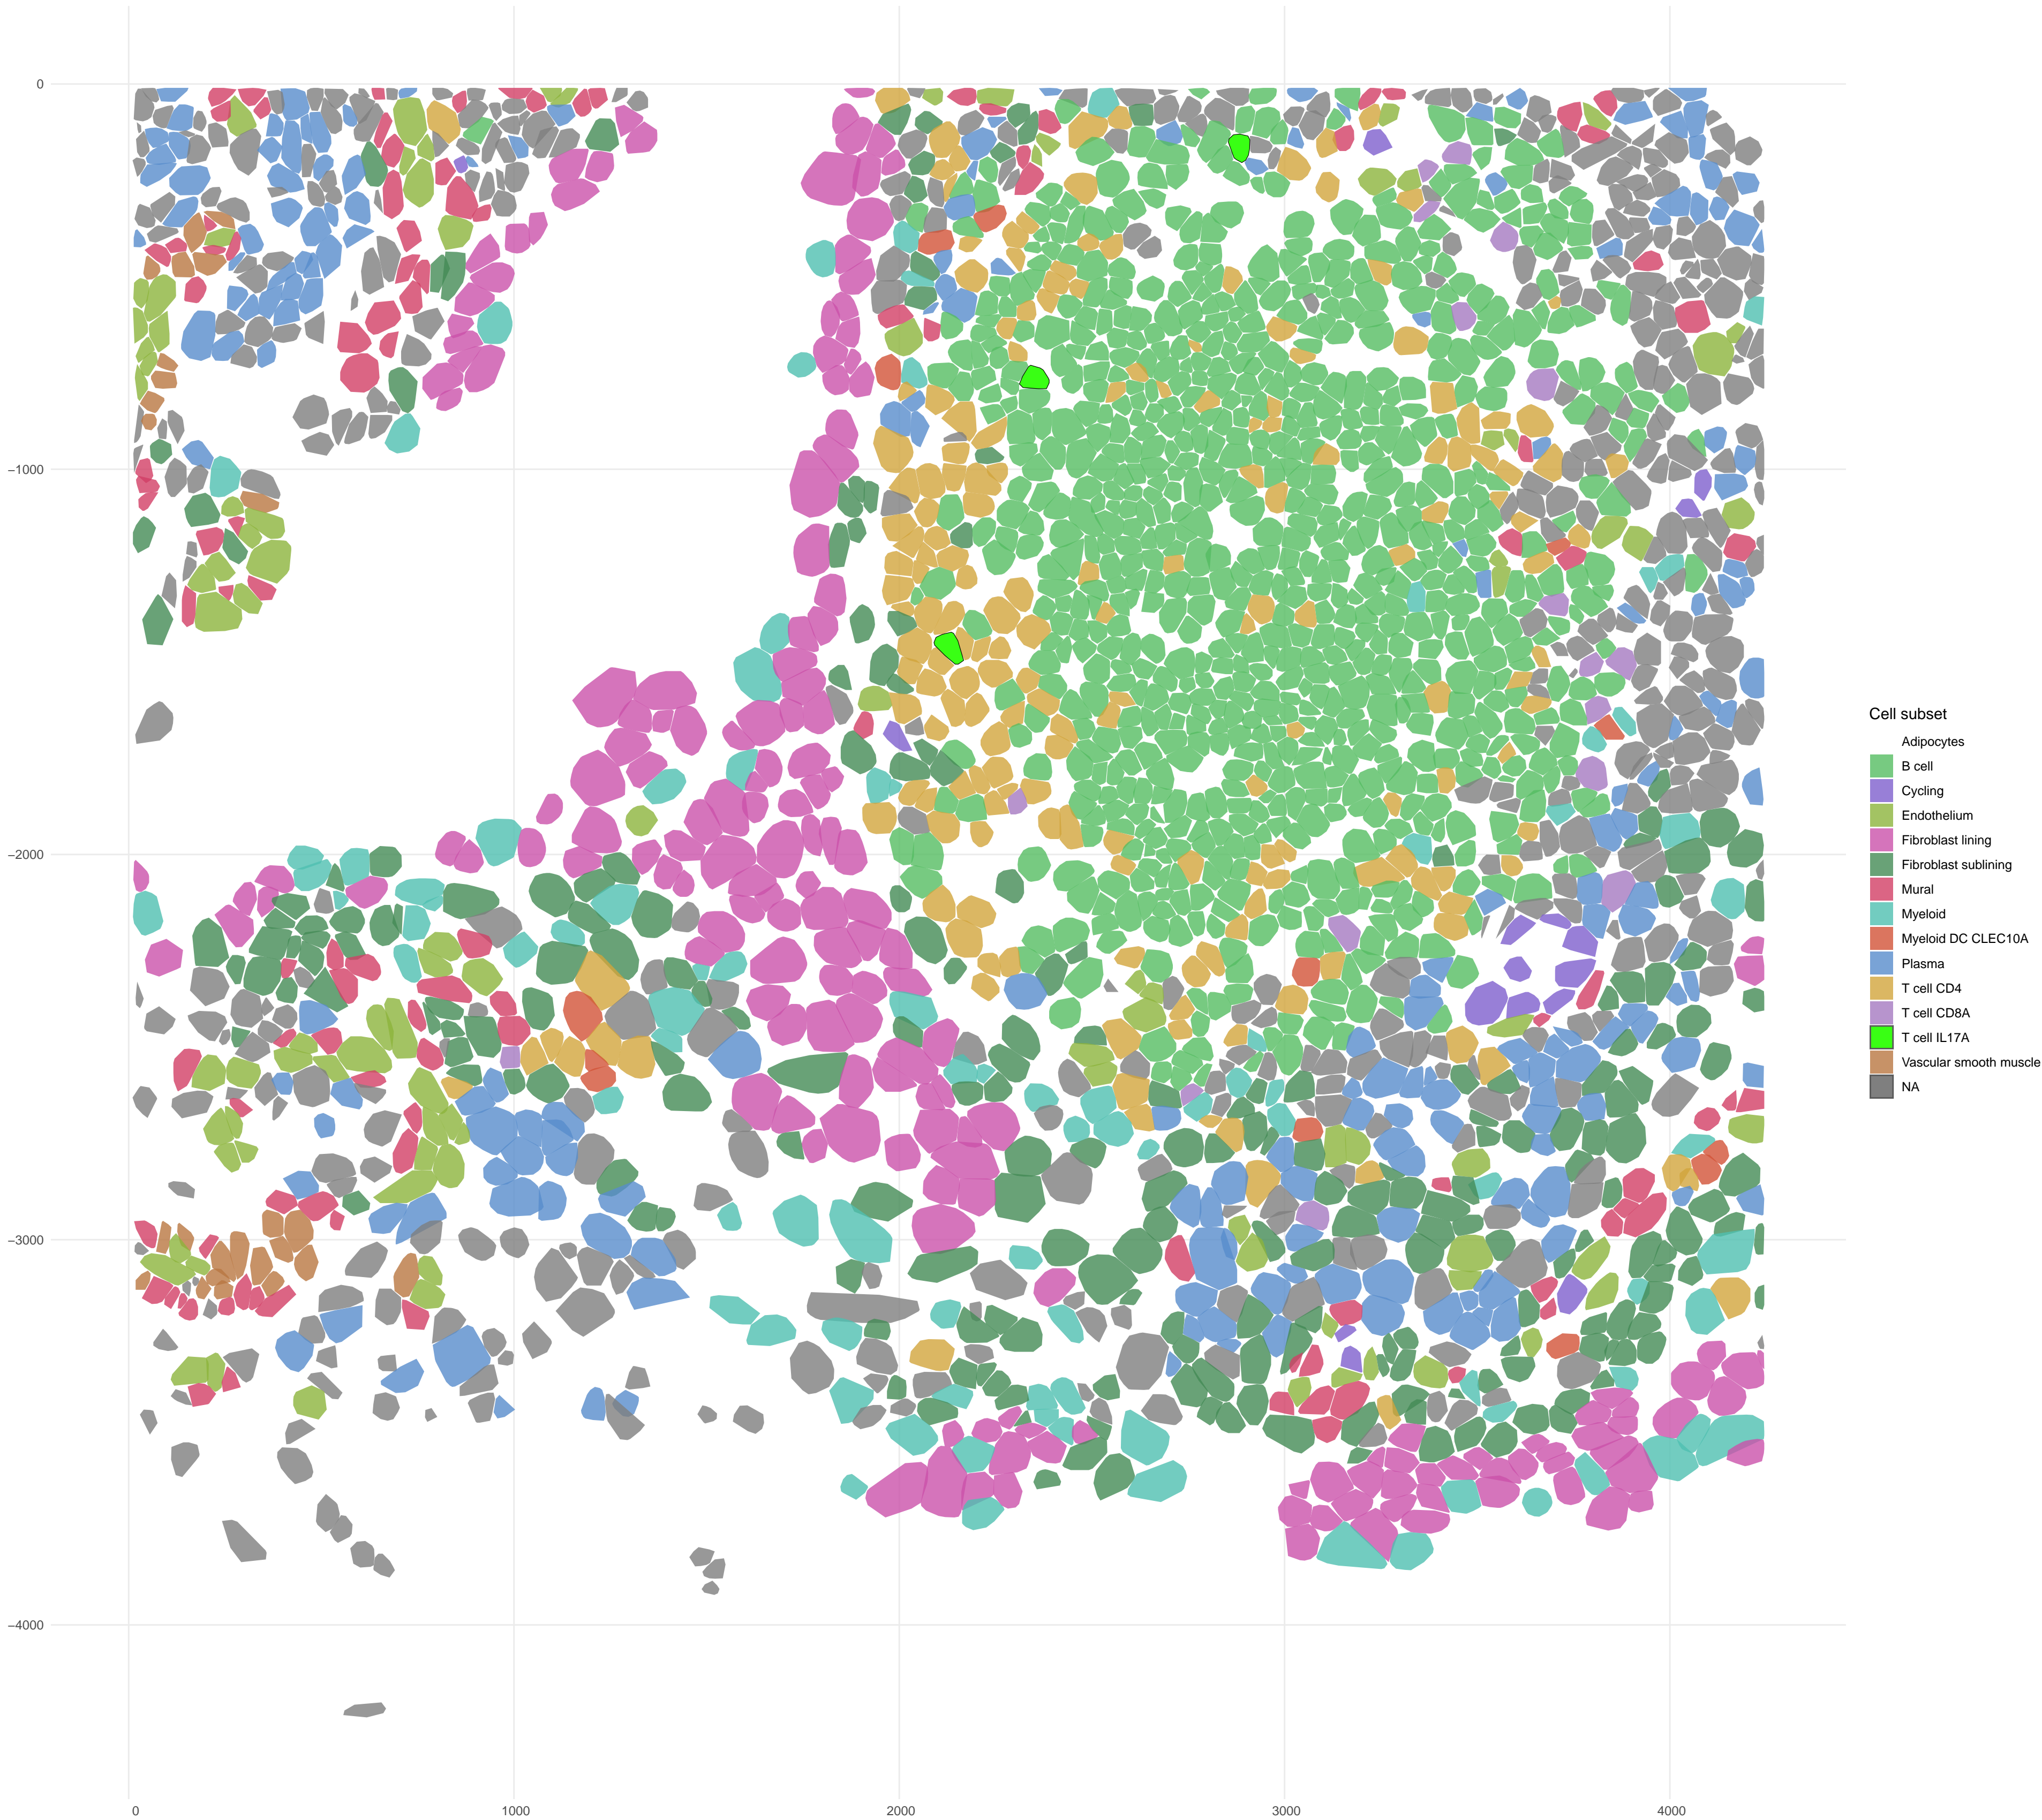



BX426 Post\_Treatment

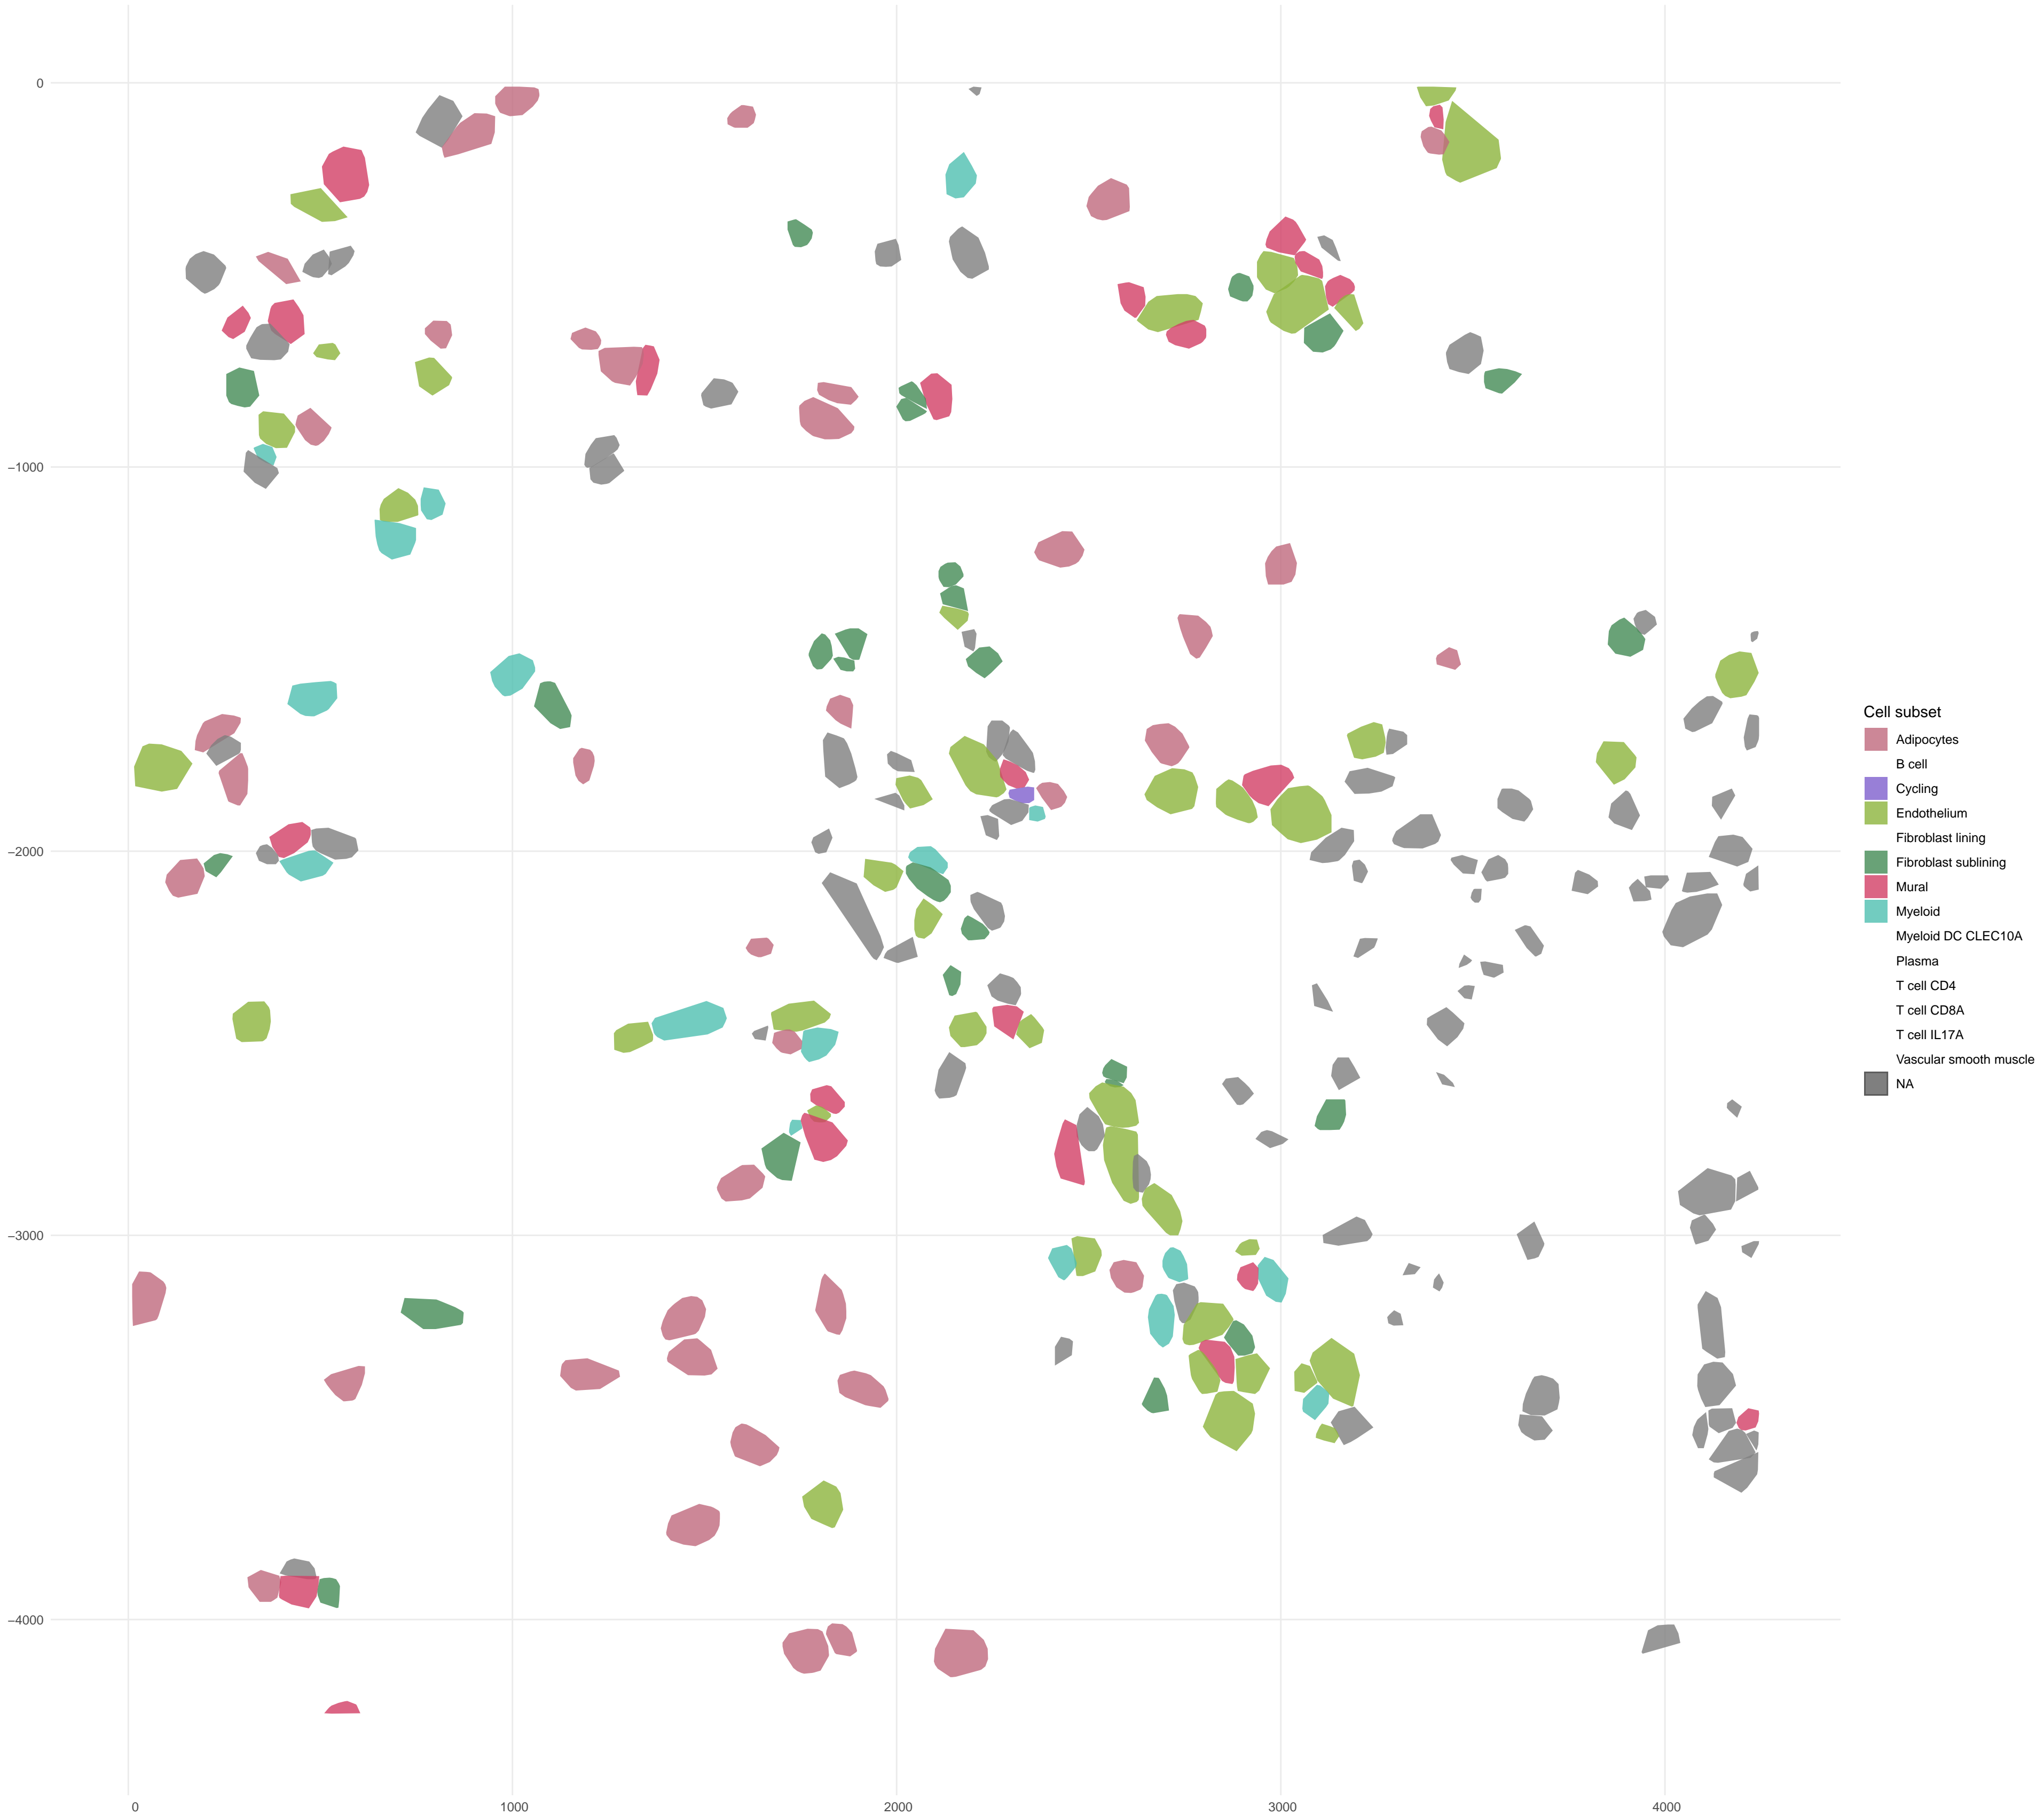

BX420 Baseline

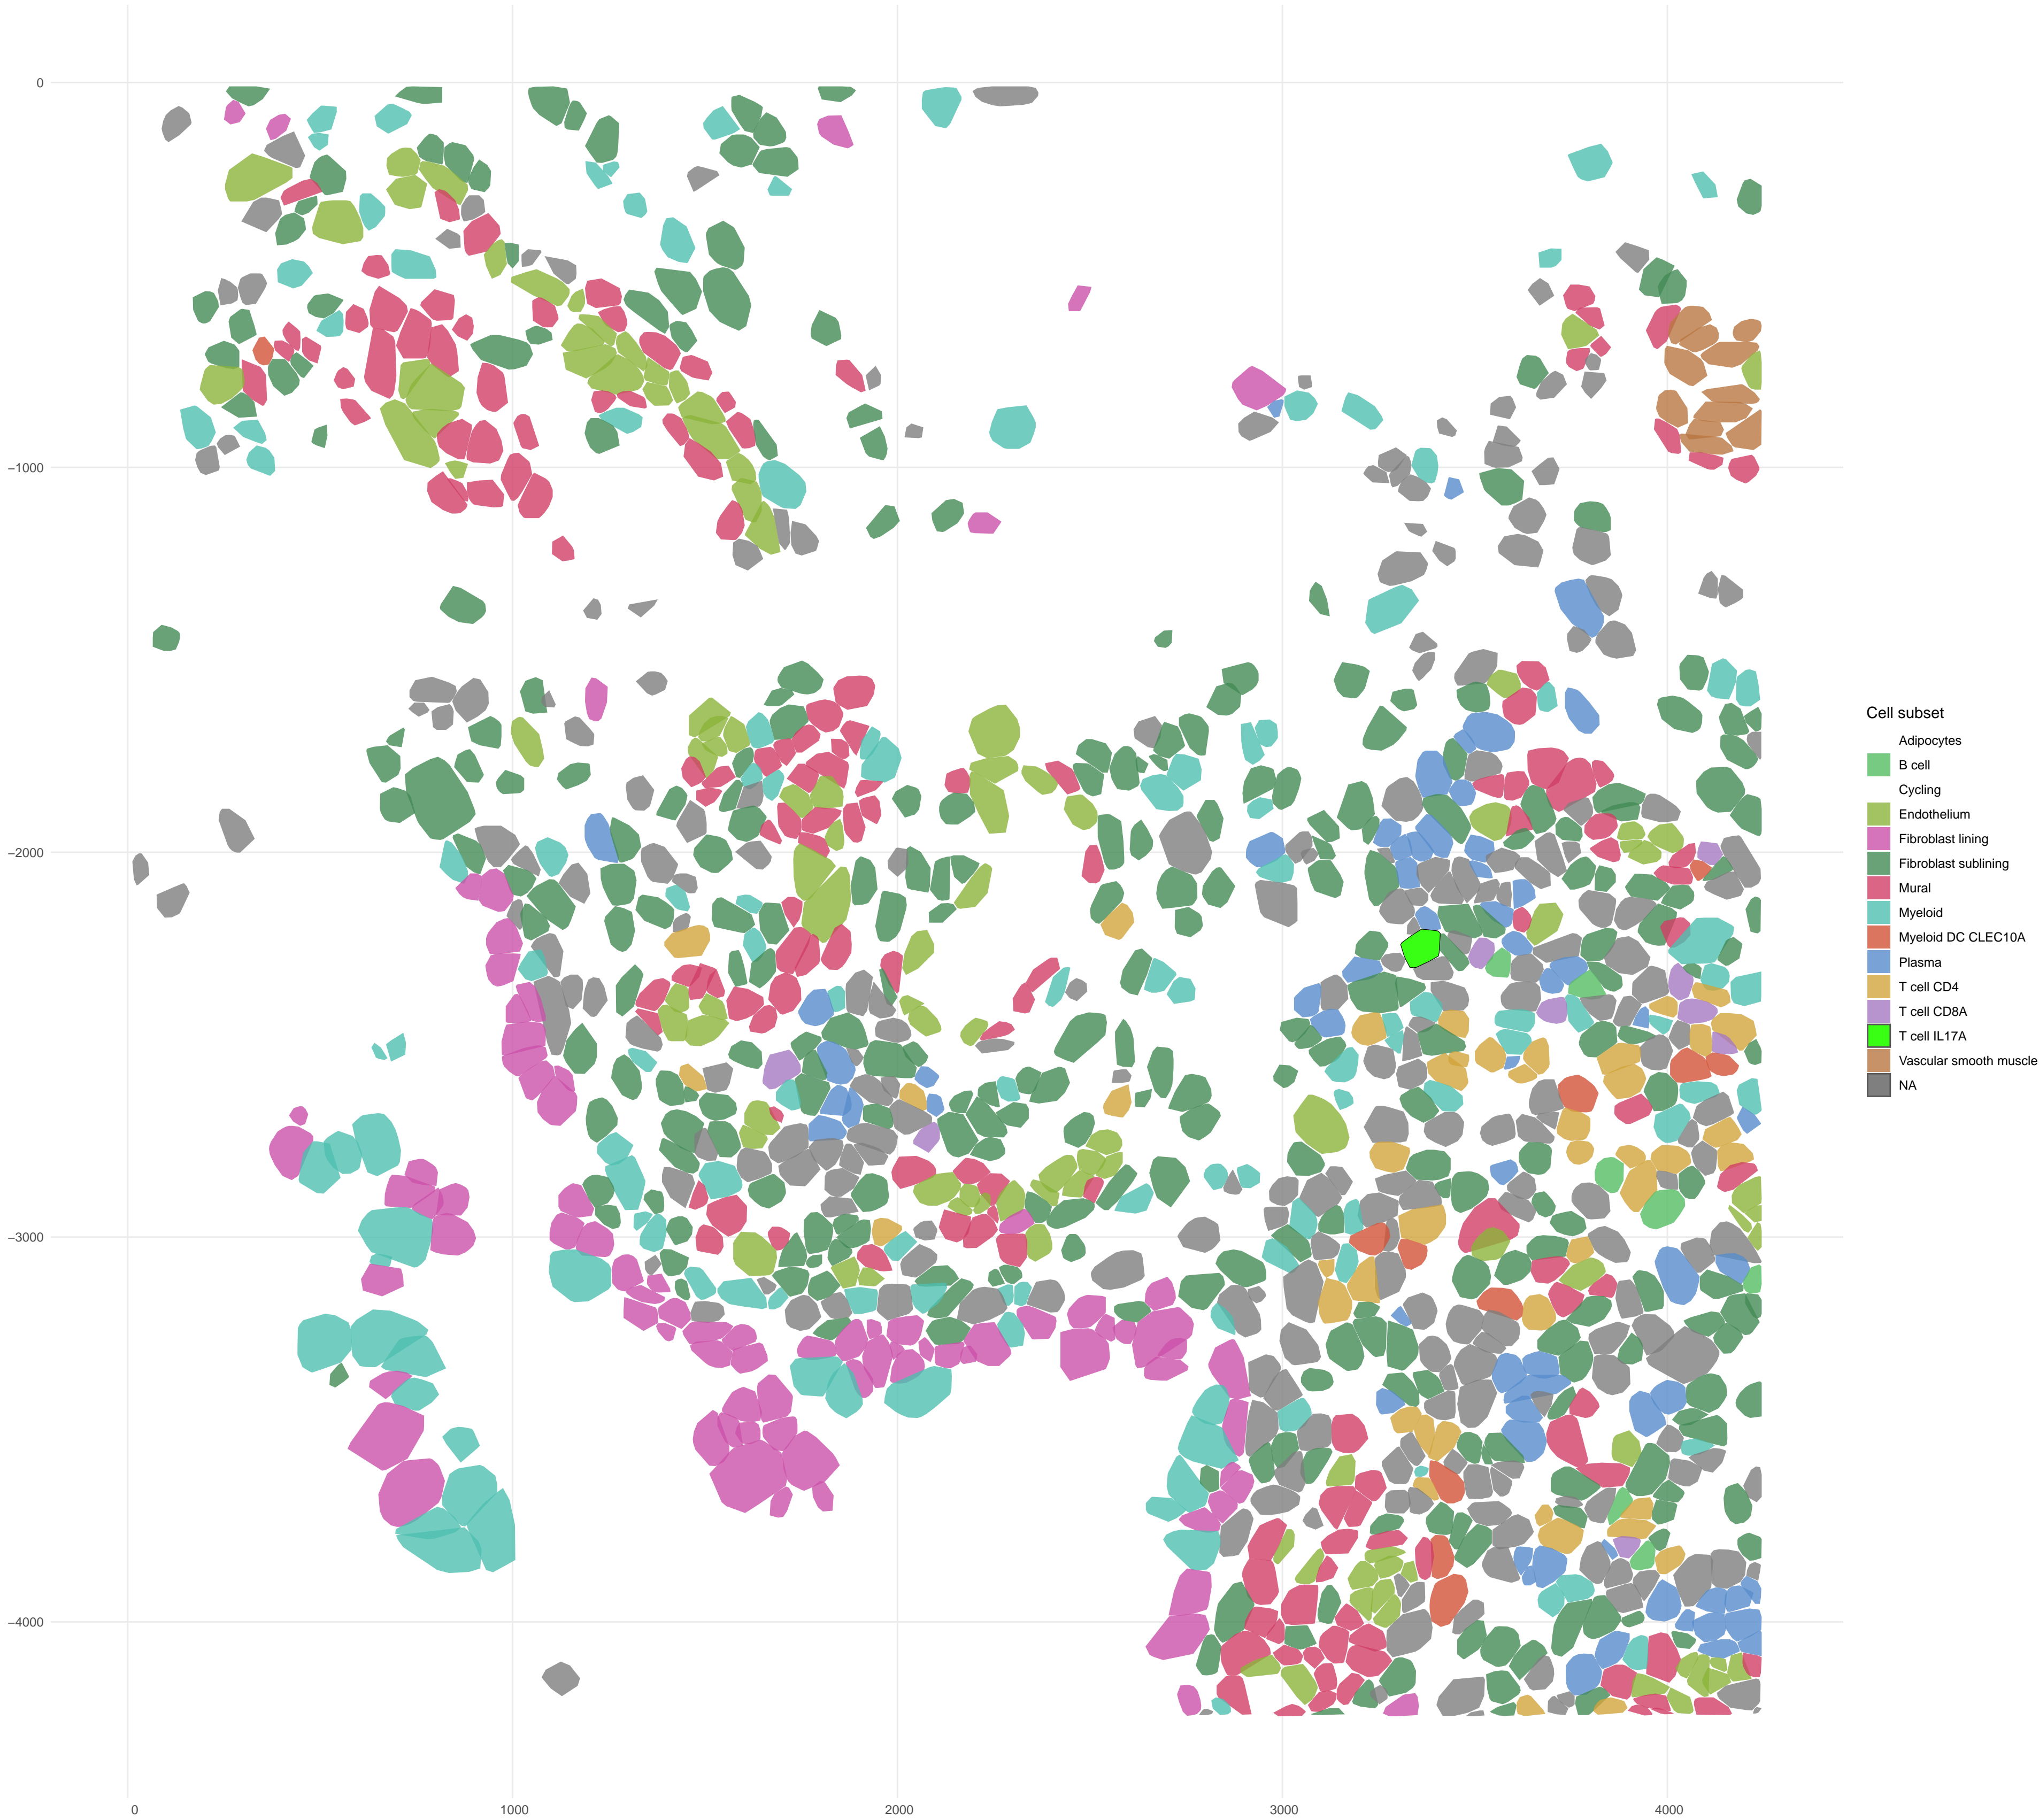



BX426 Post\_Treatment

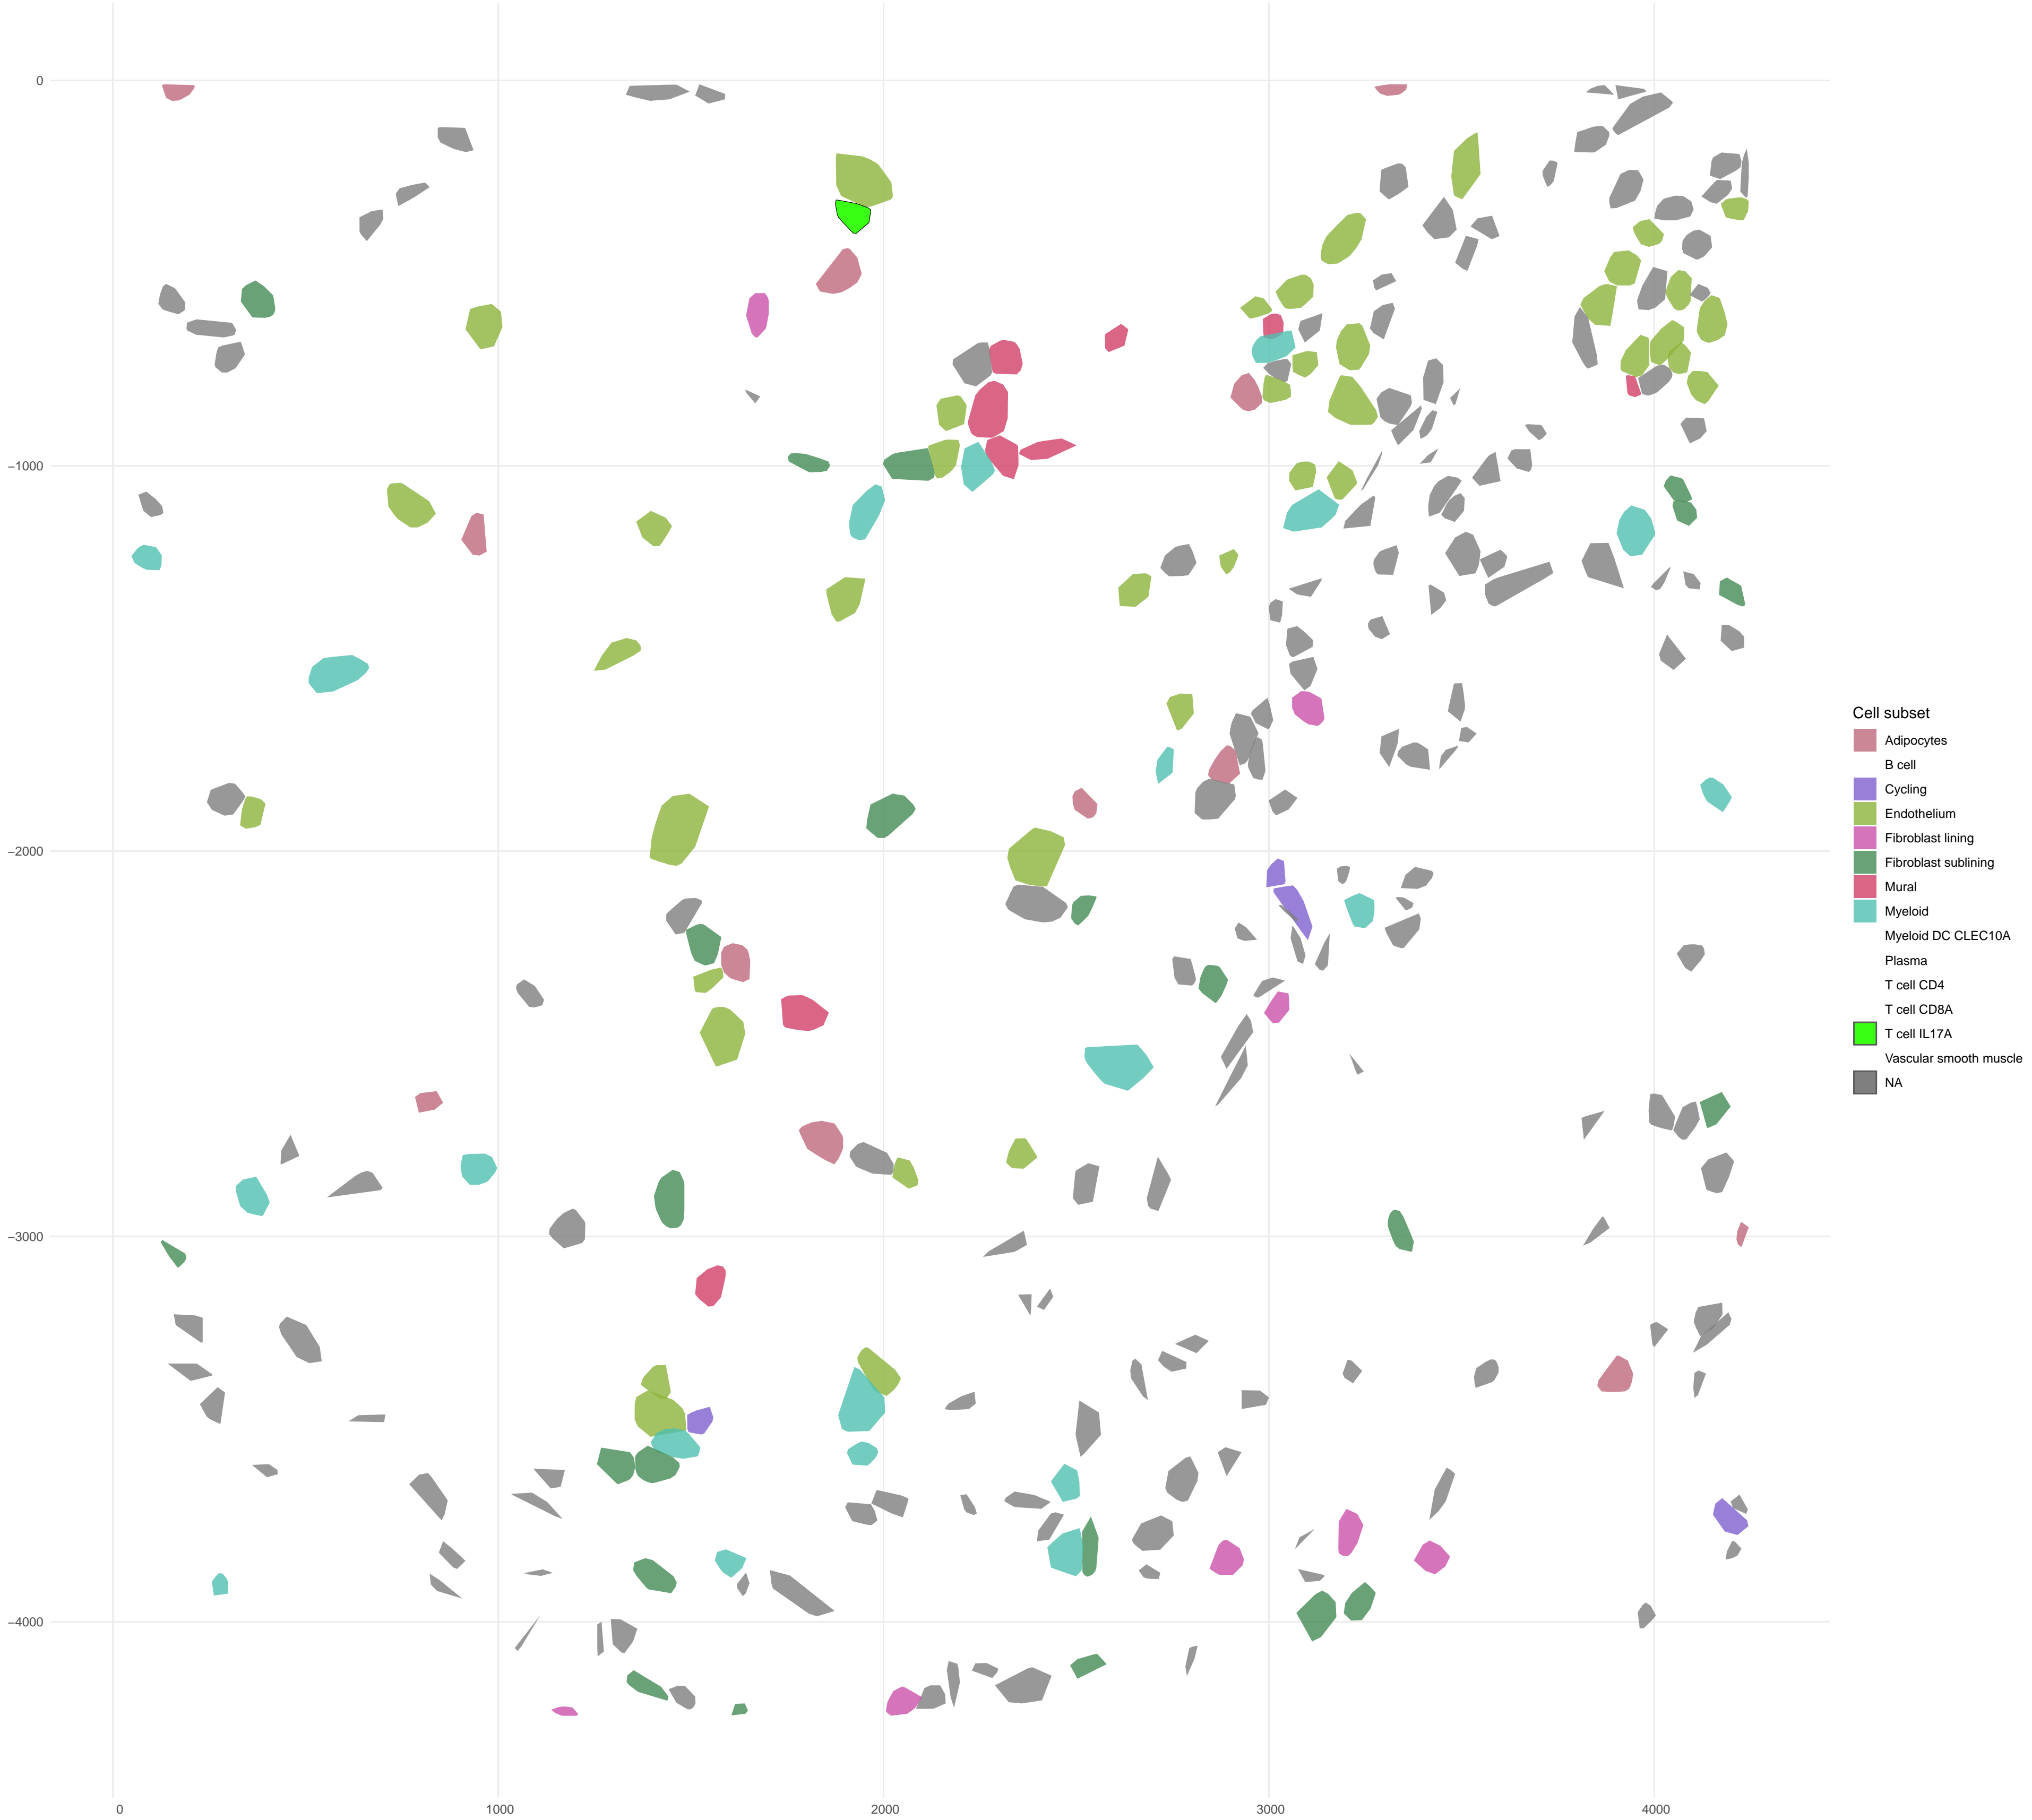

BX420 Baseline

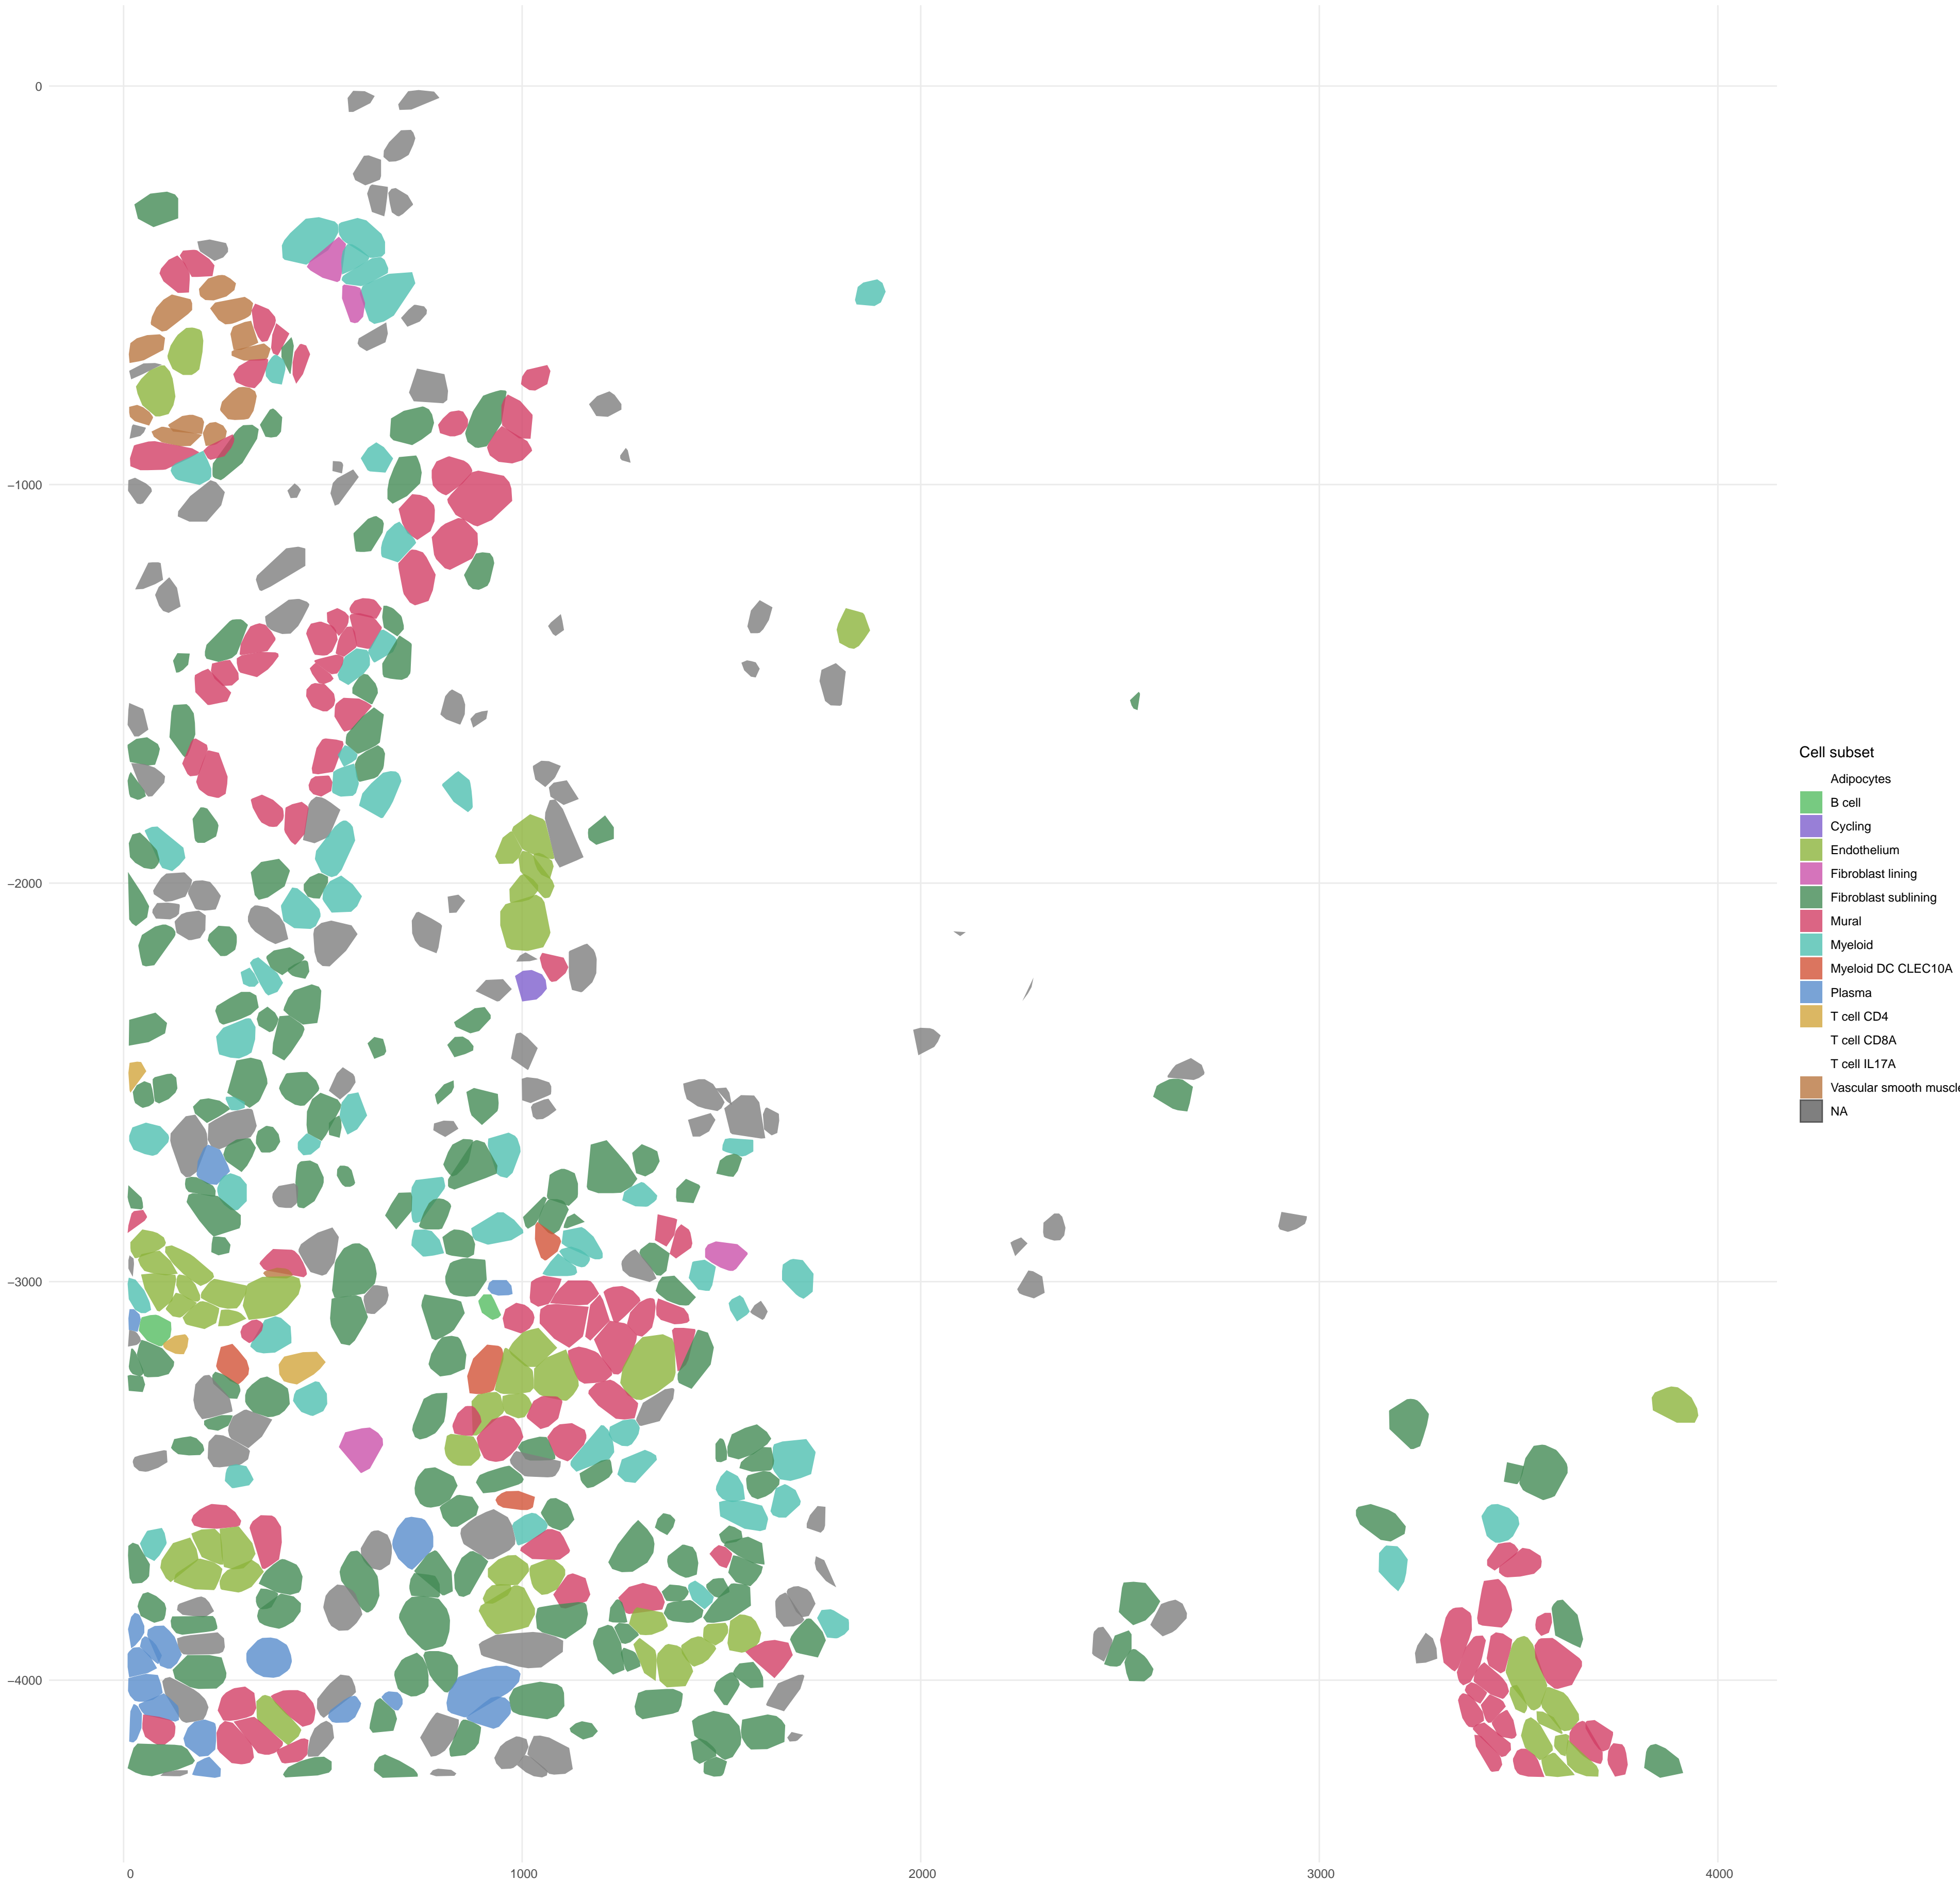



BX441 Post\_Treatment

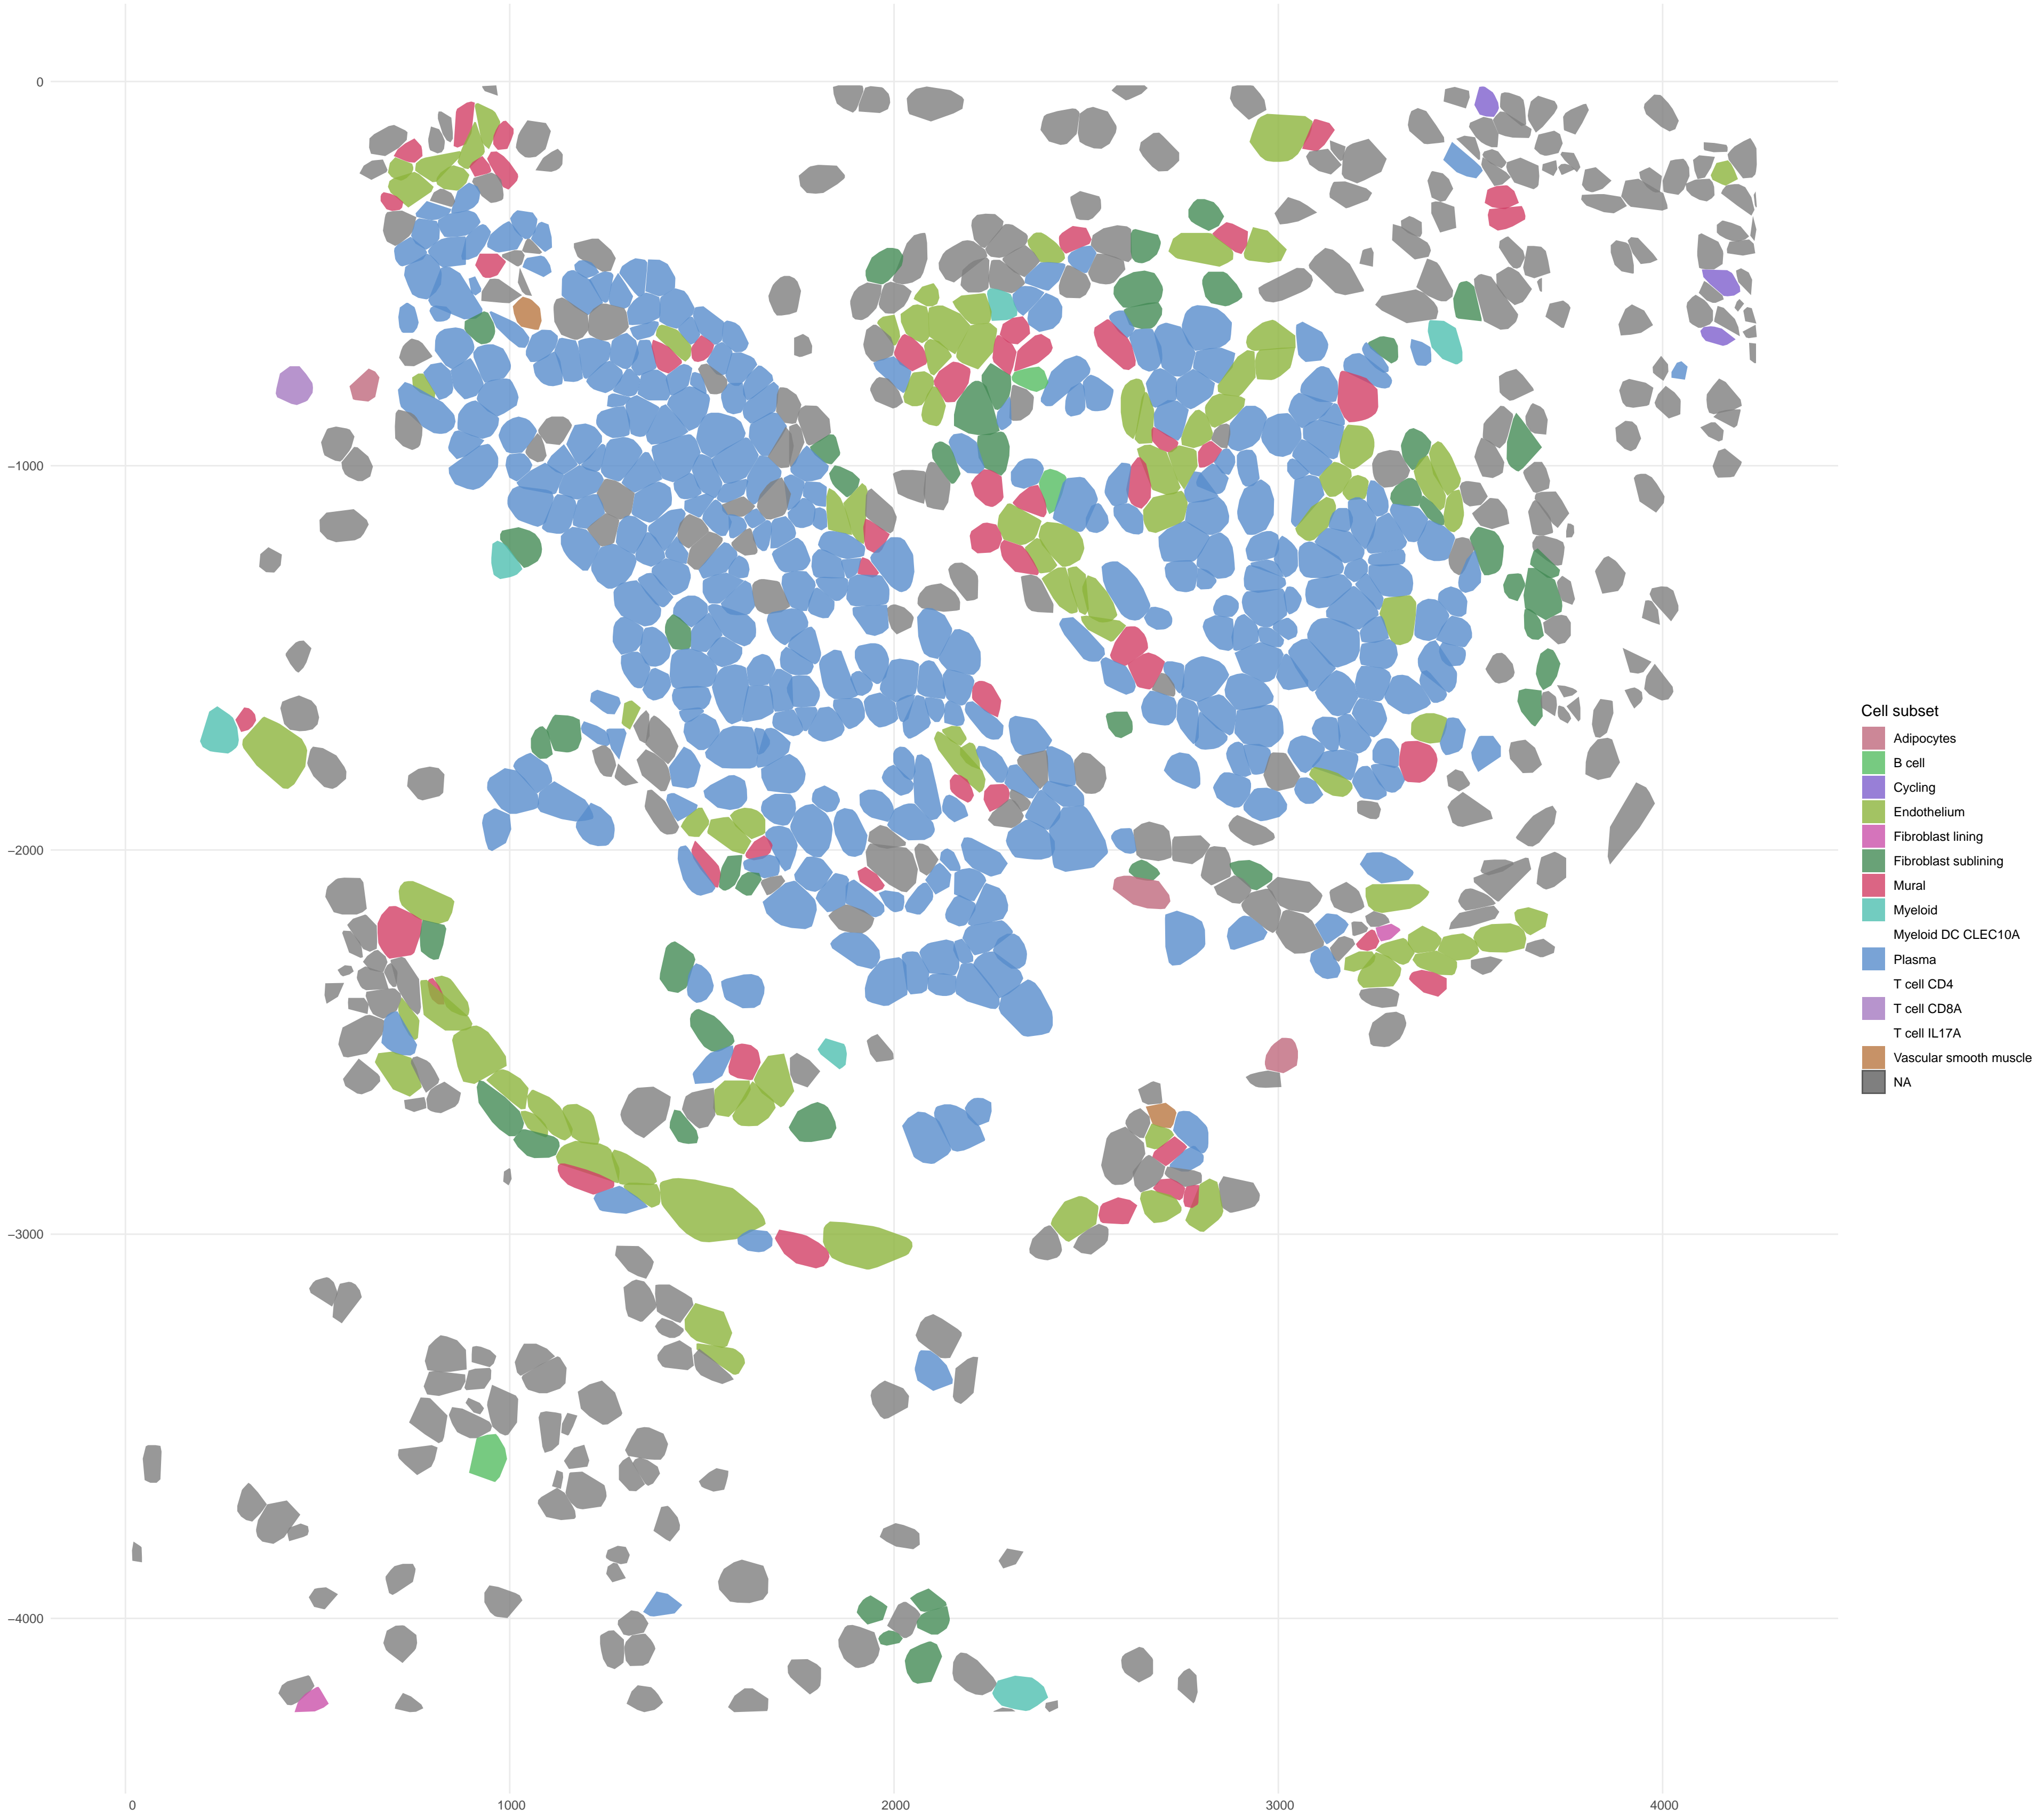

BX423 Baseline

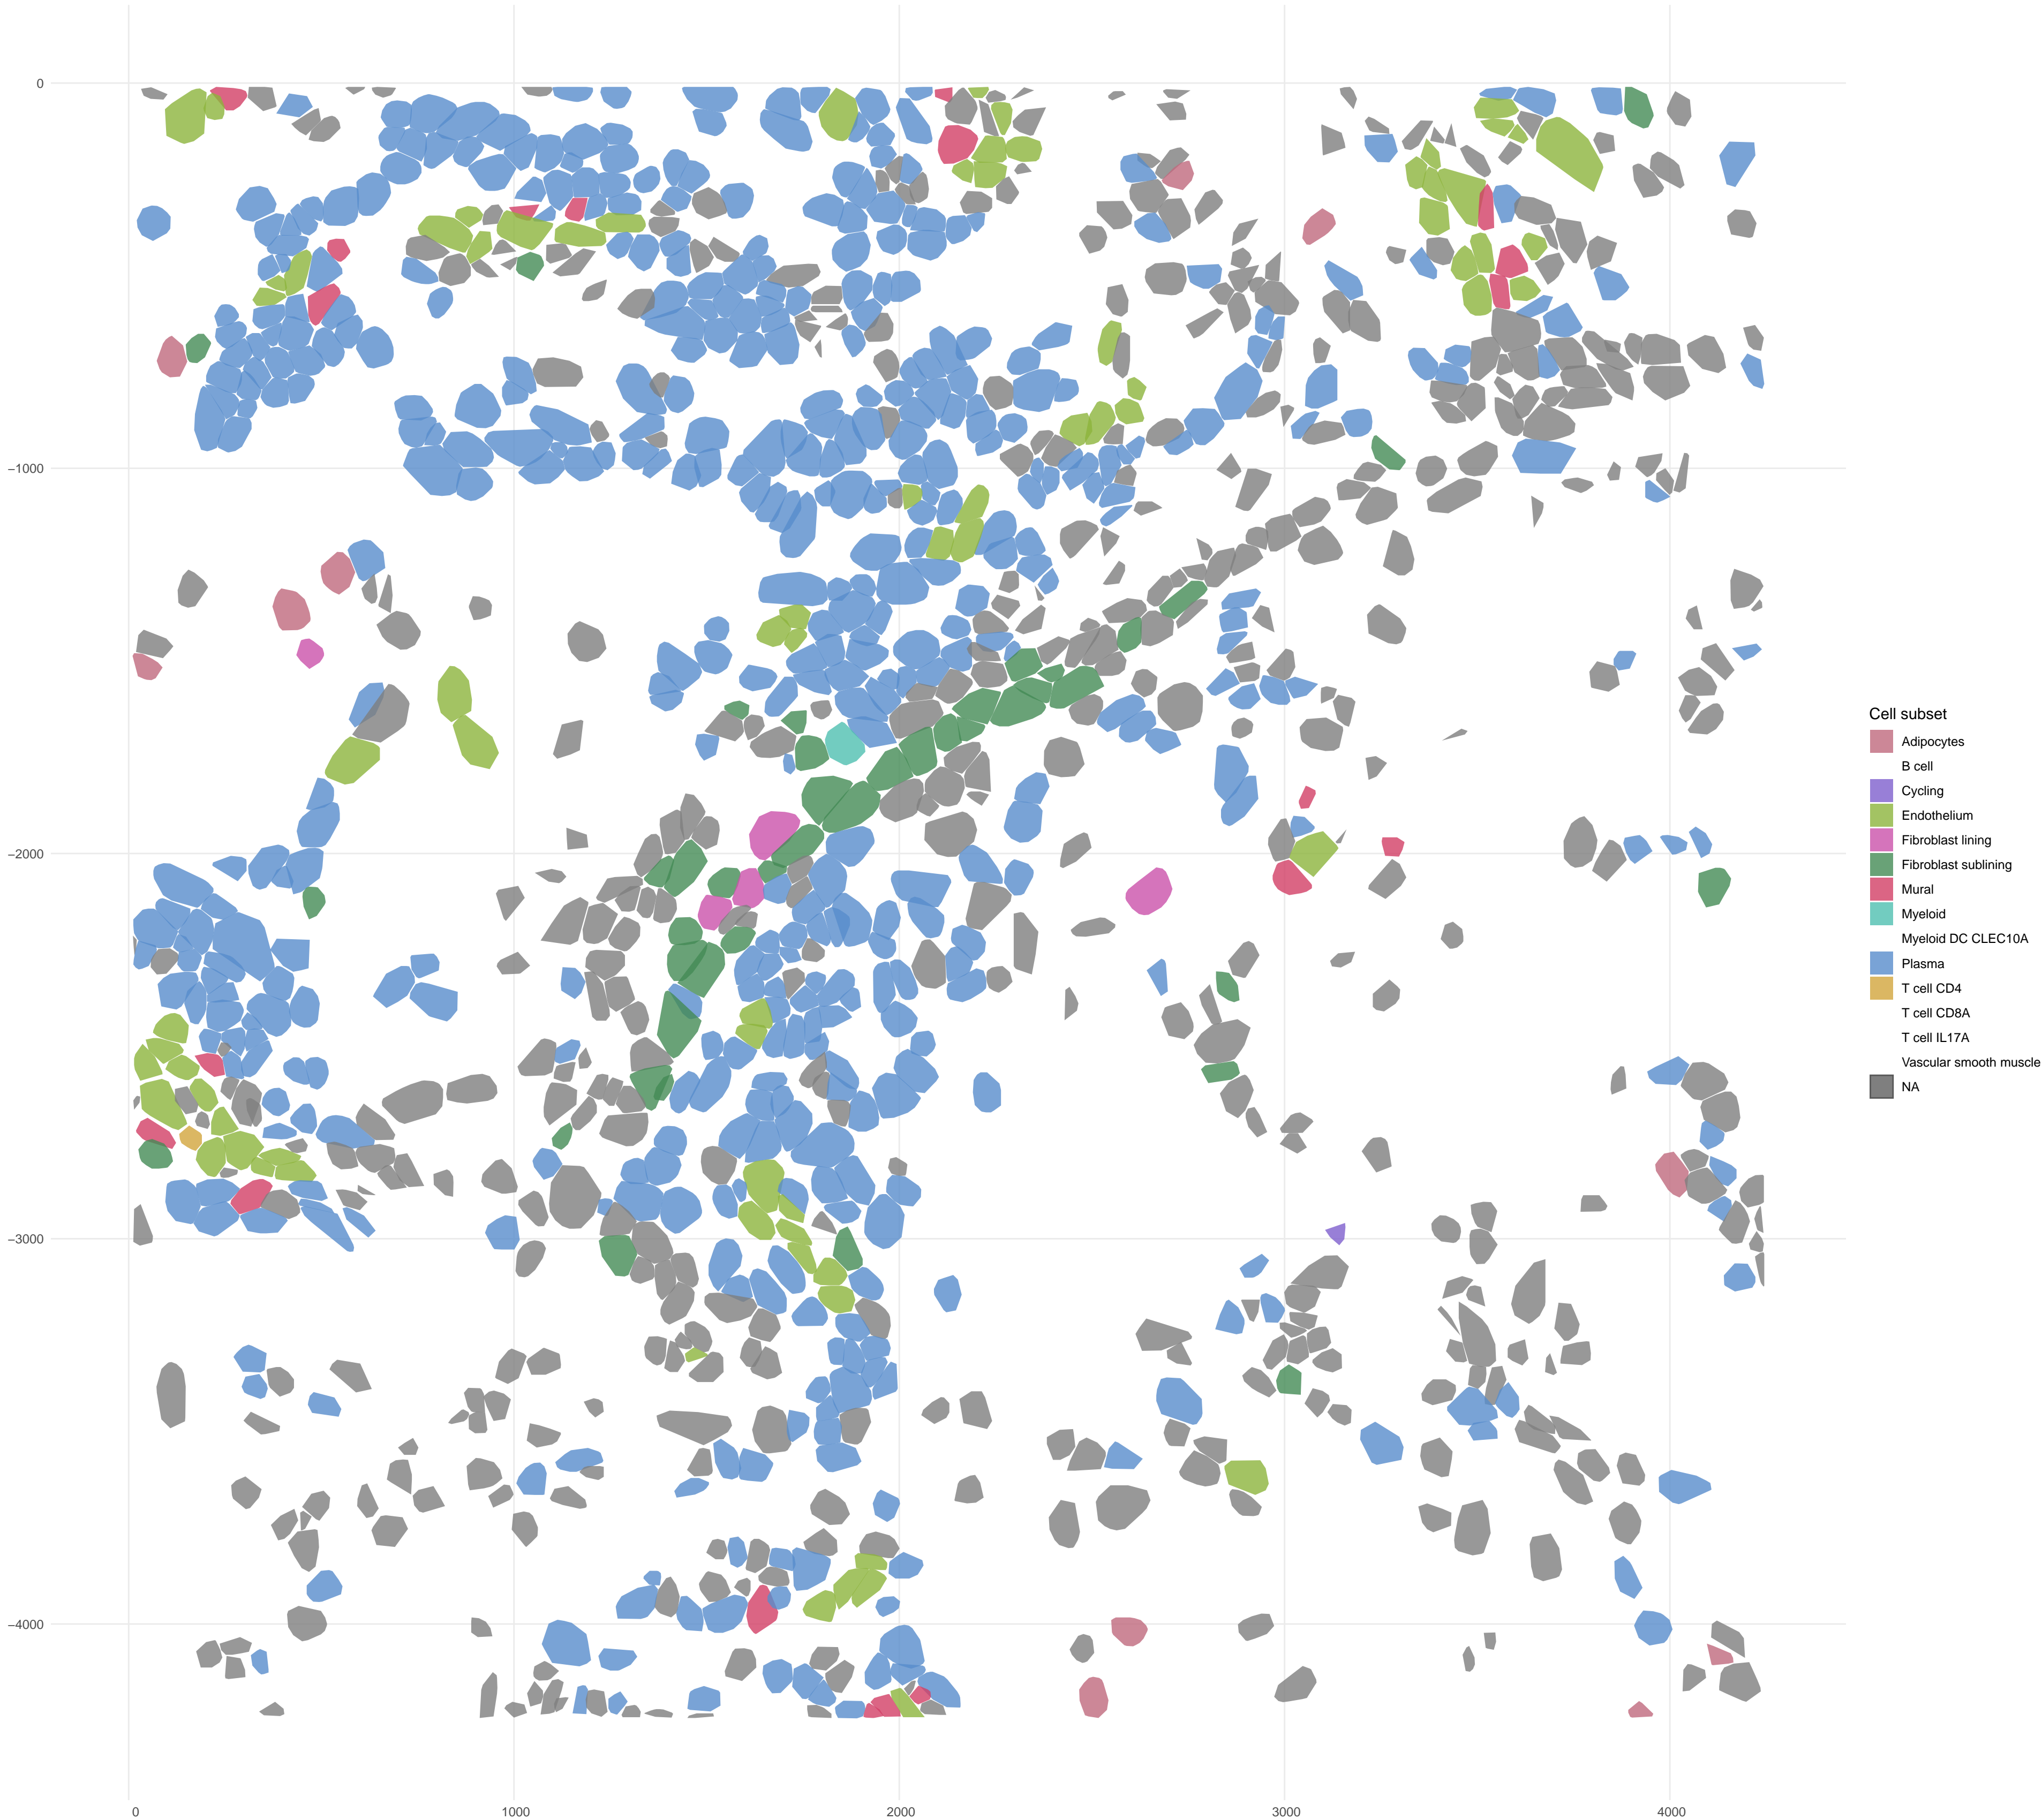



BX439 Post\_Treatment

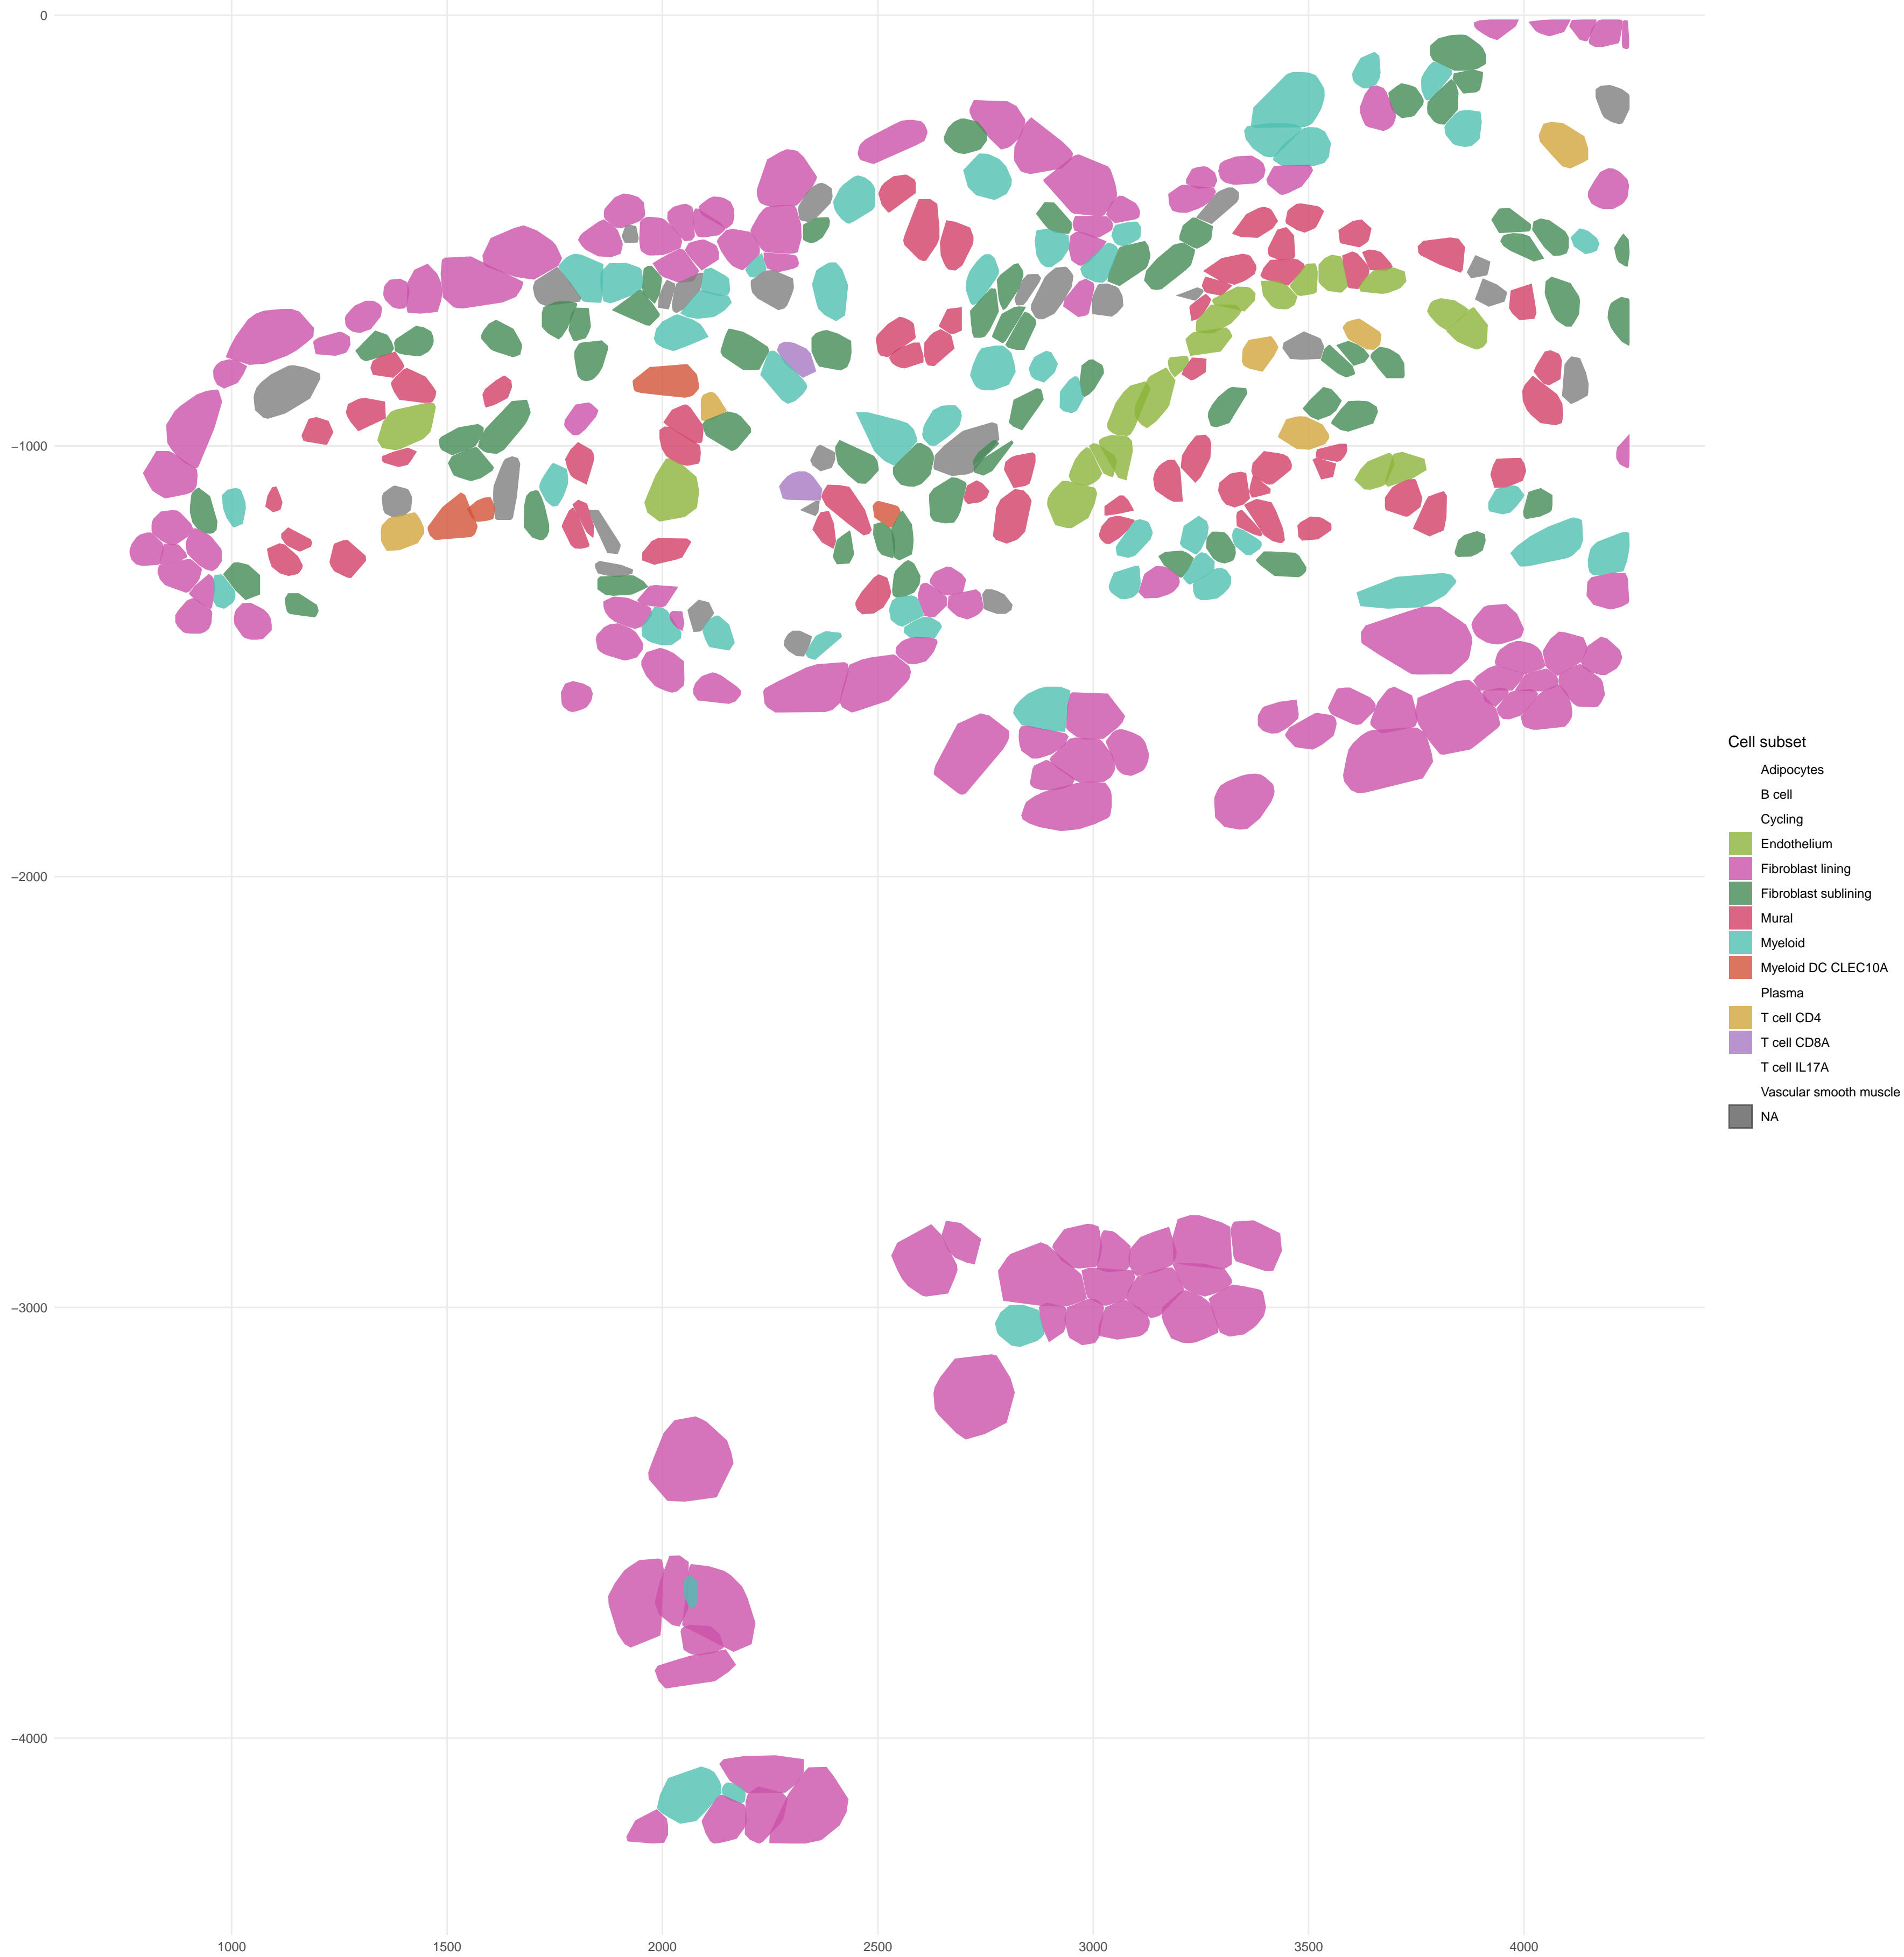

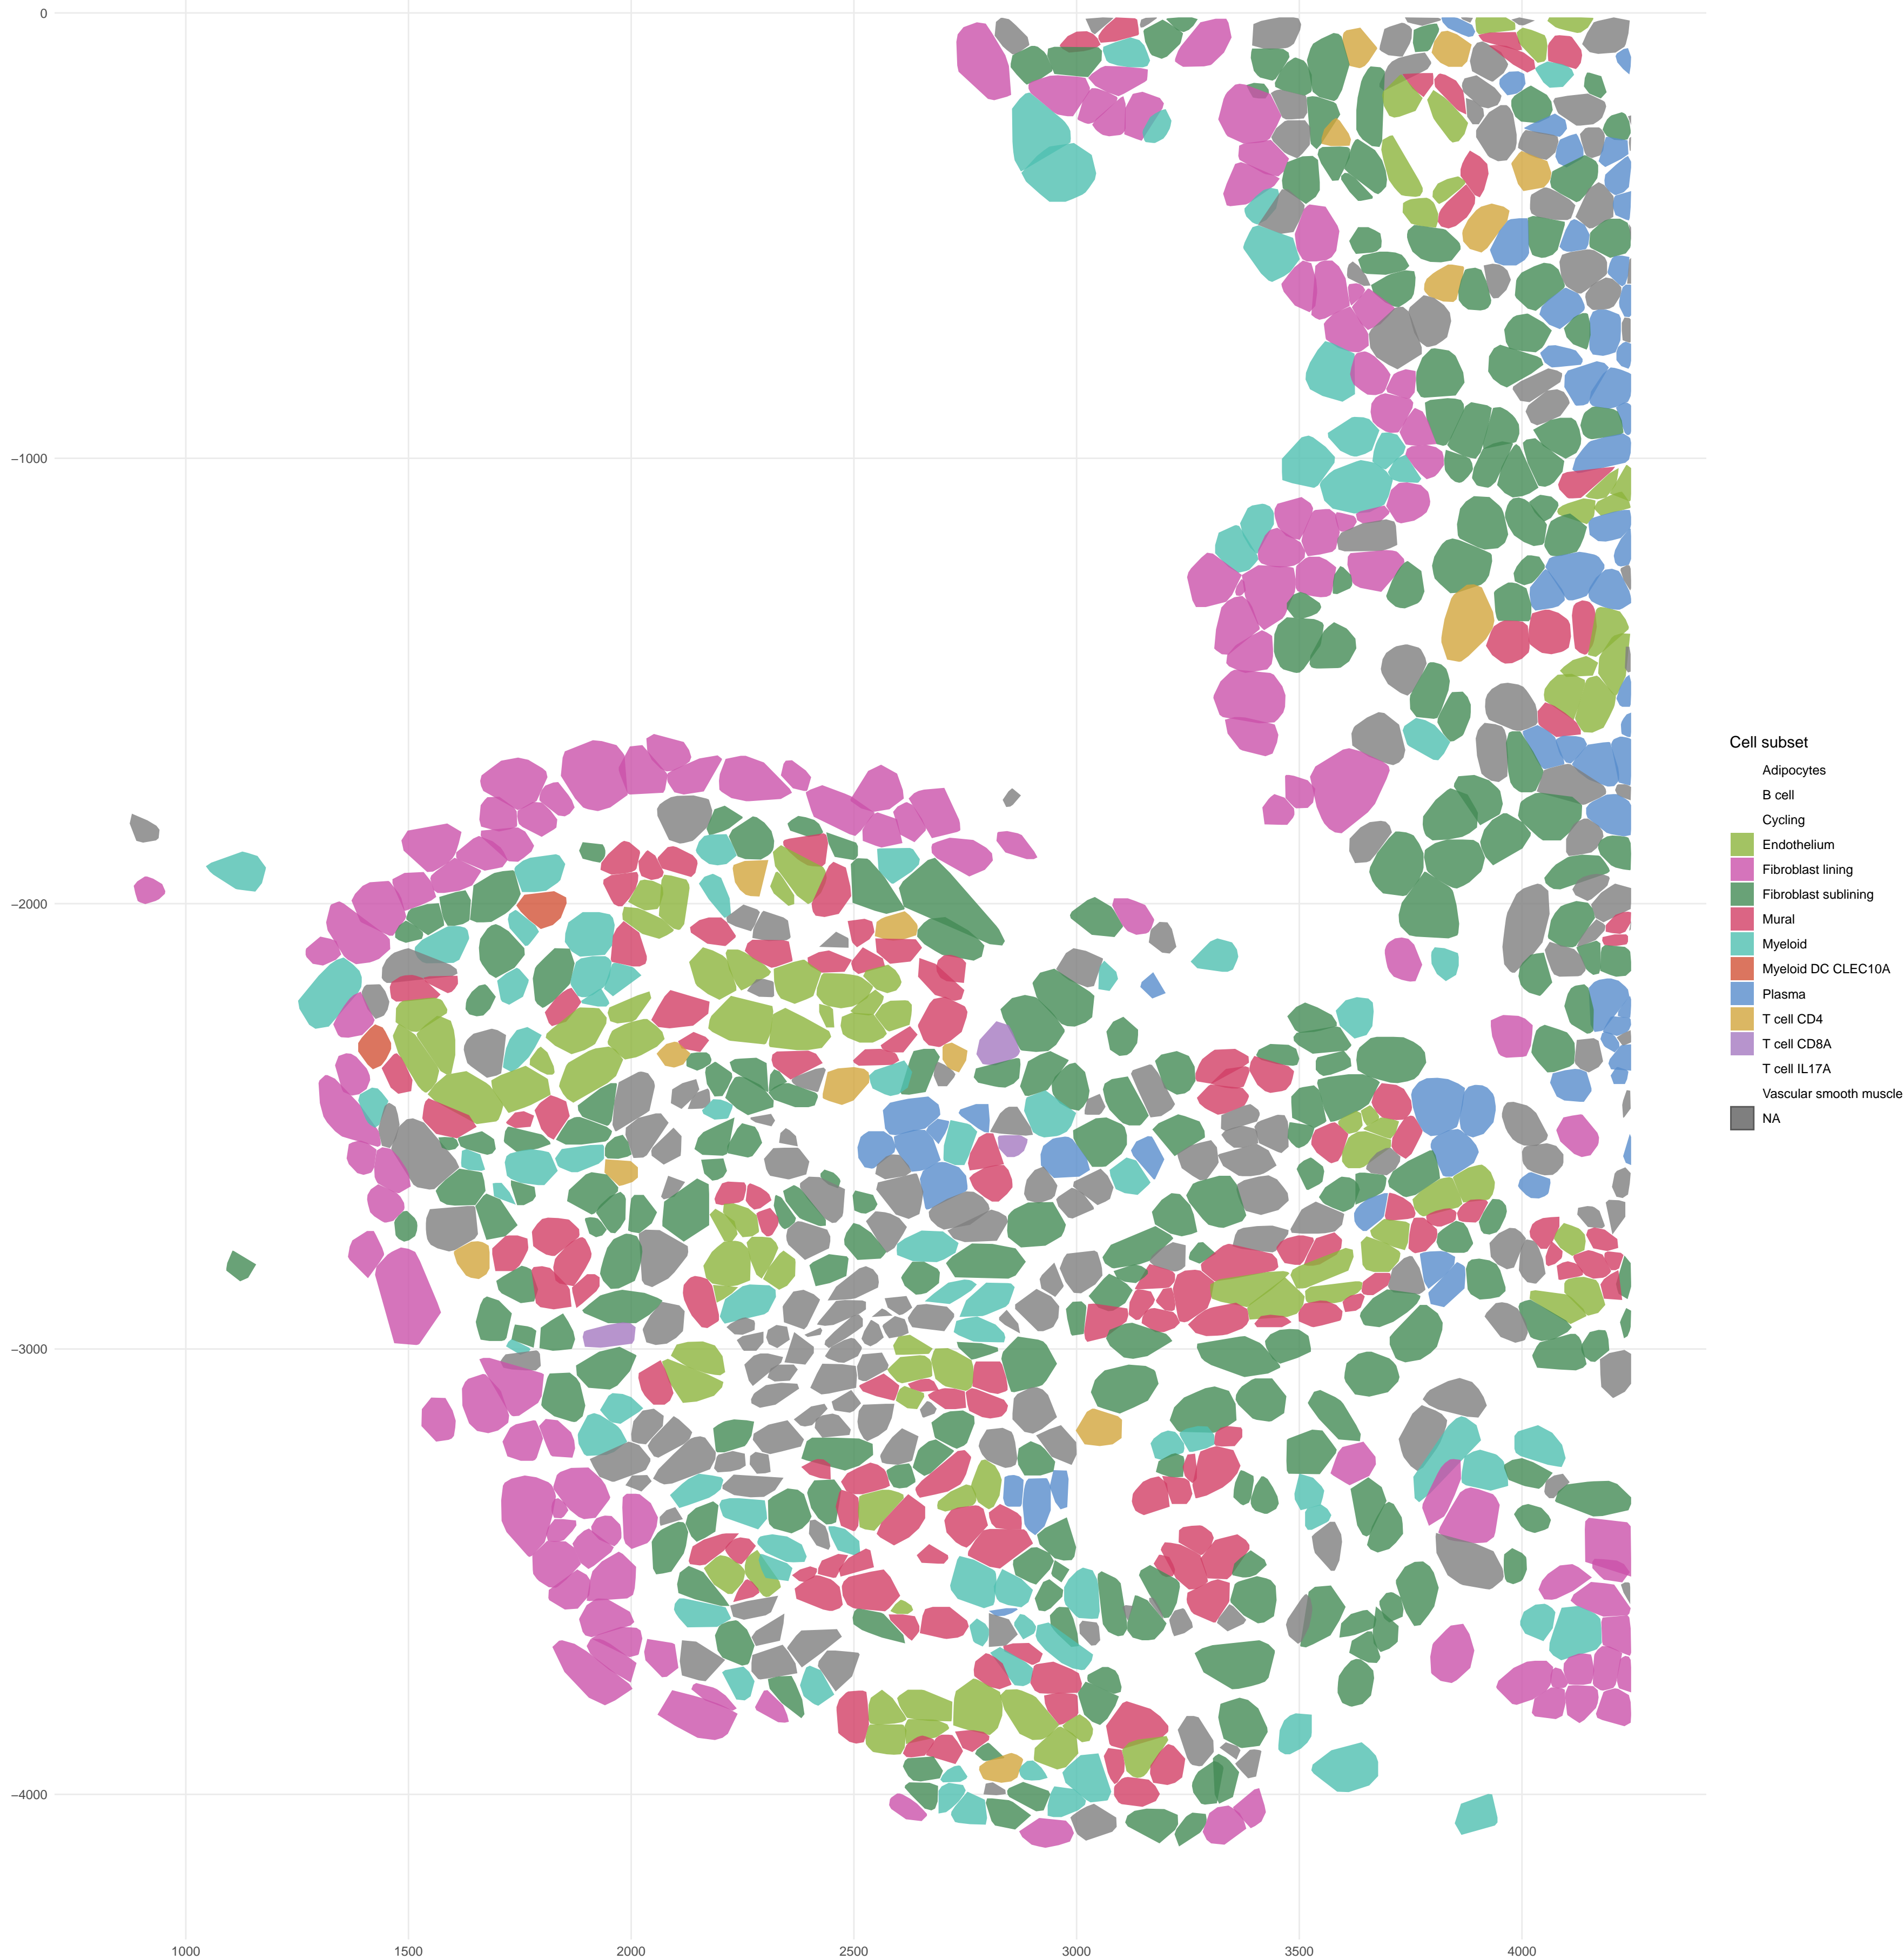

BX439 Post\_Treatment

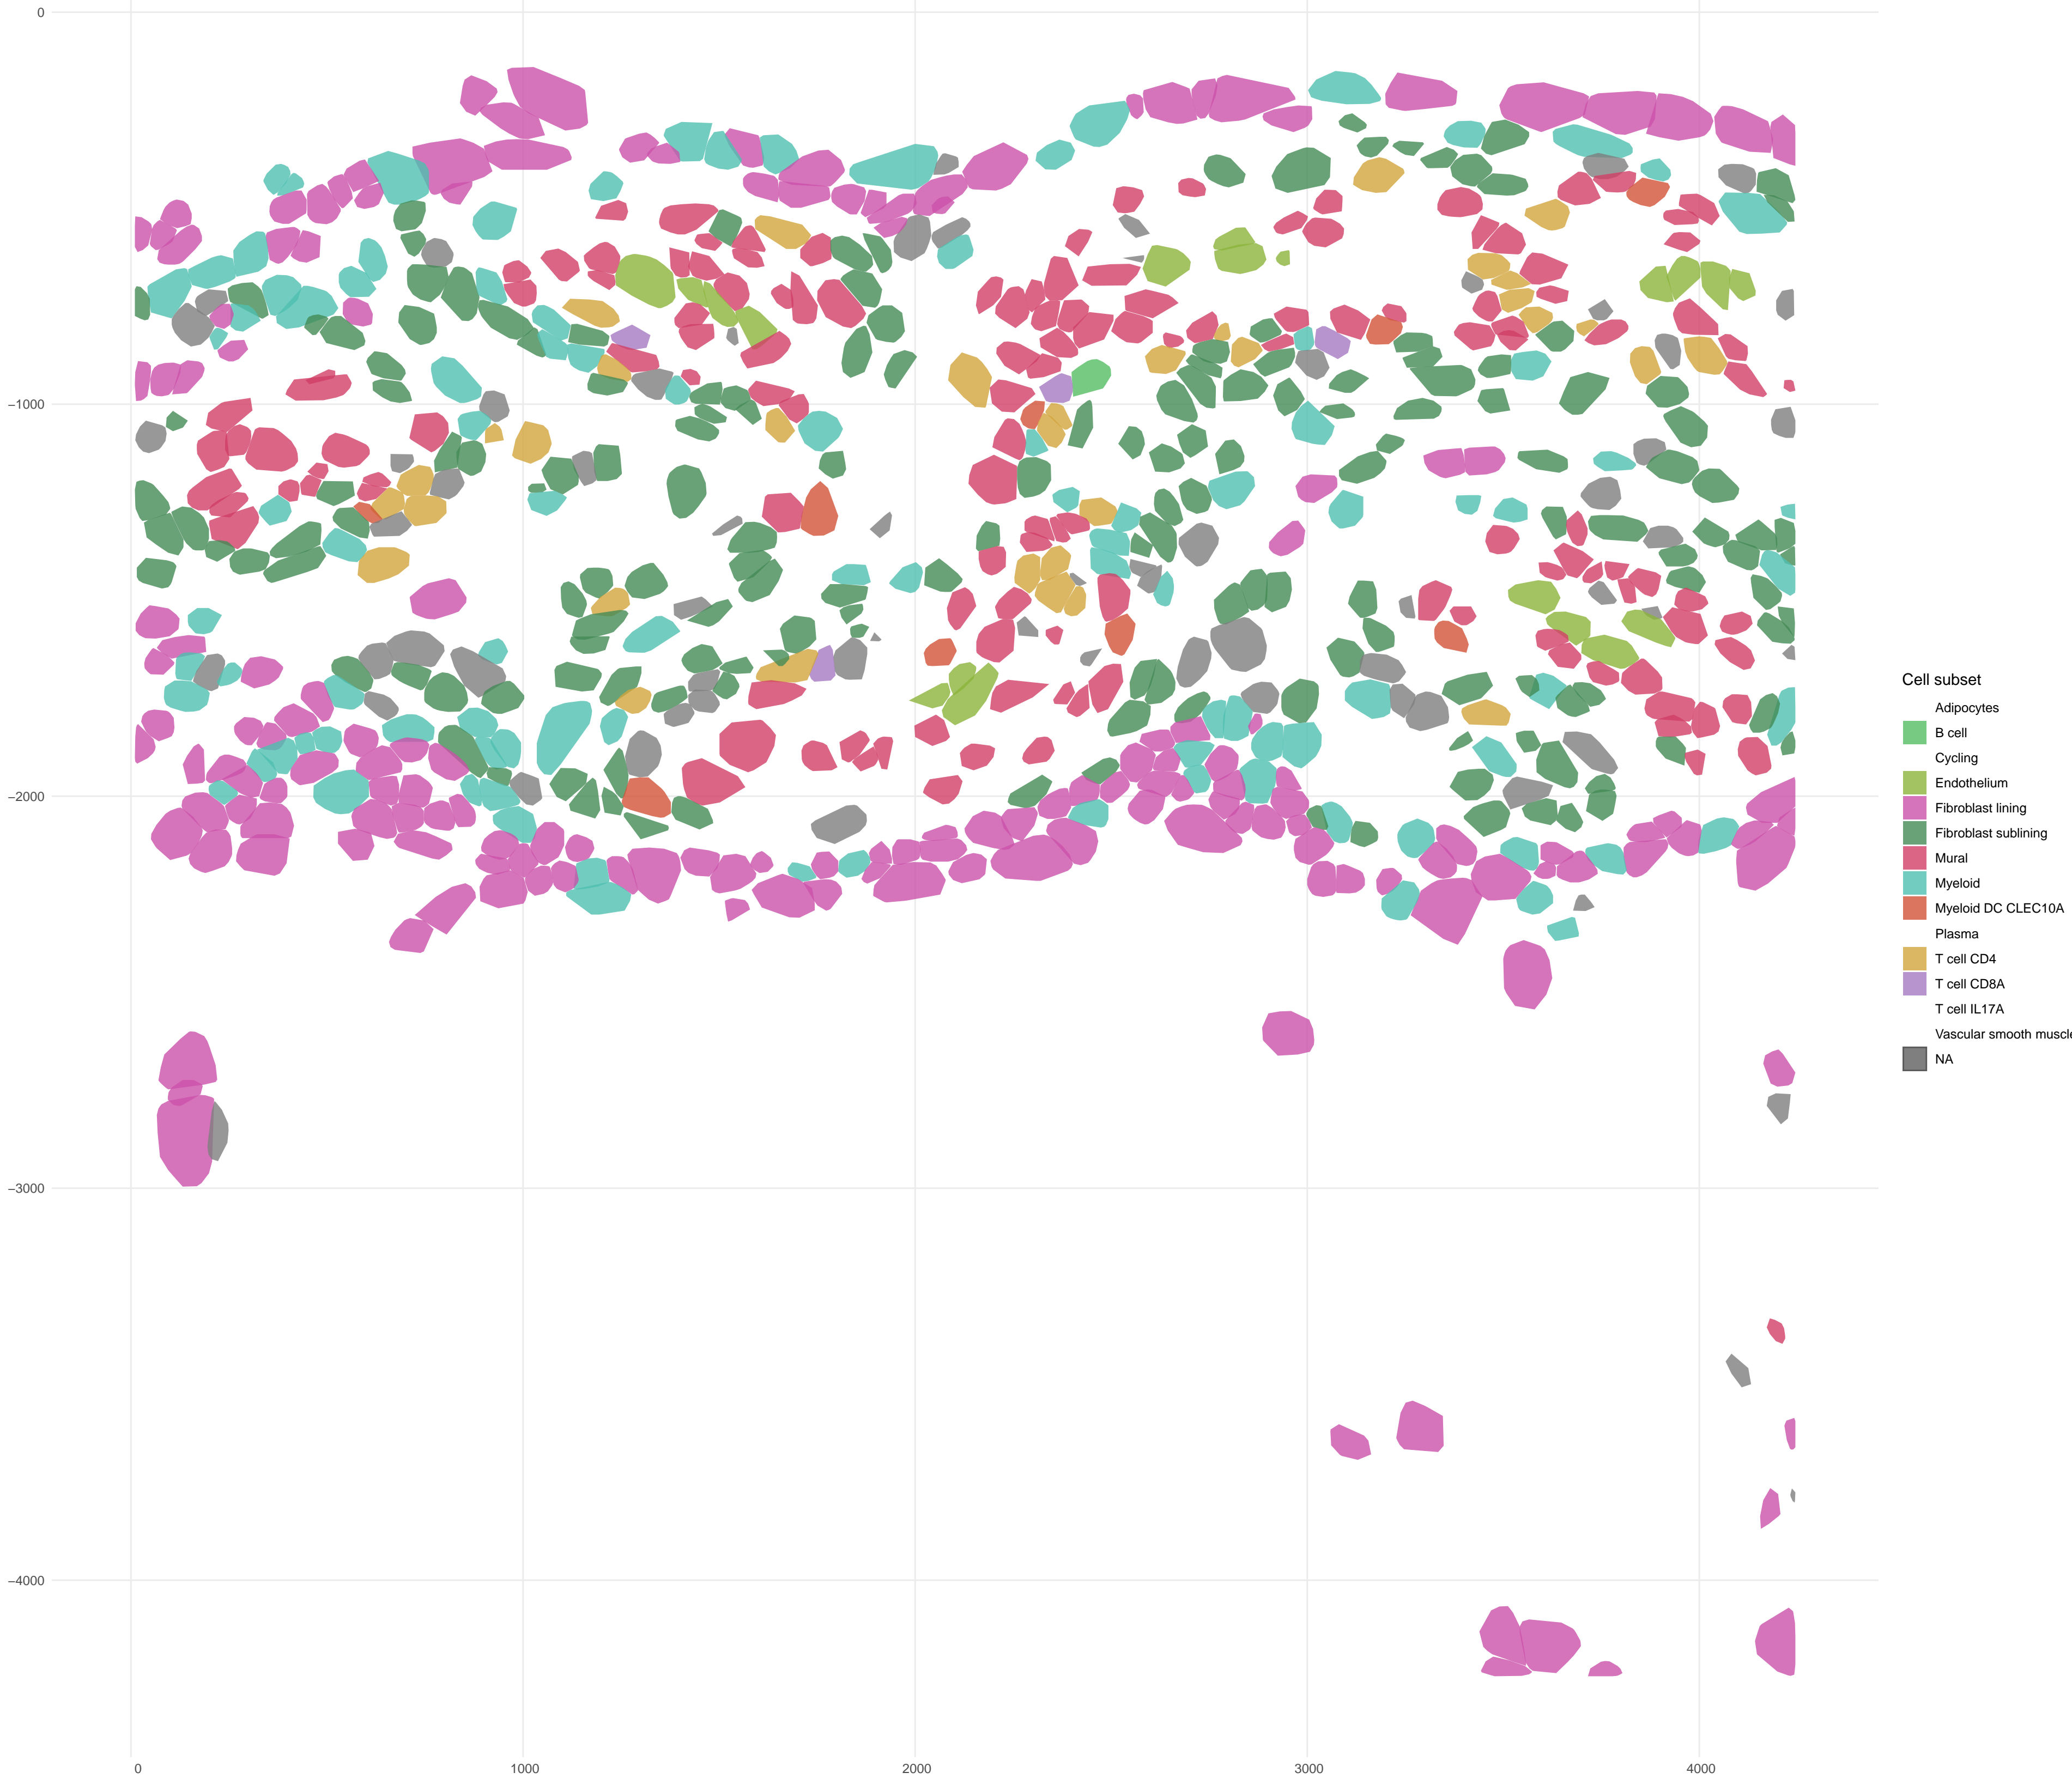



BX420 Baseline

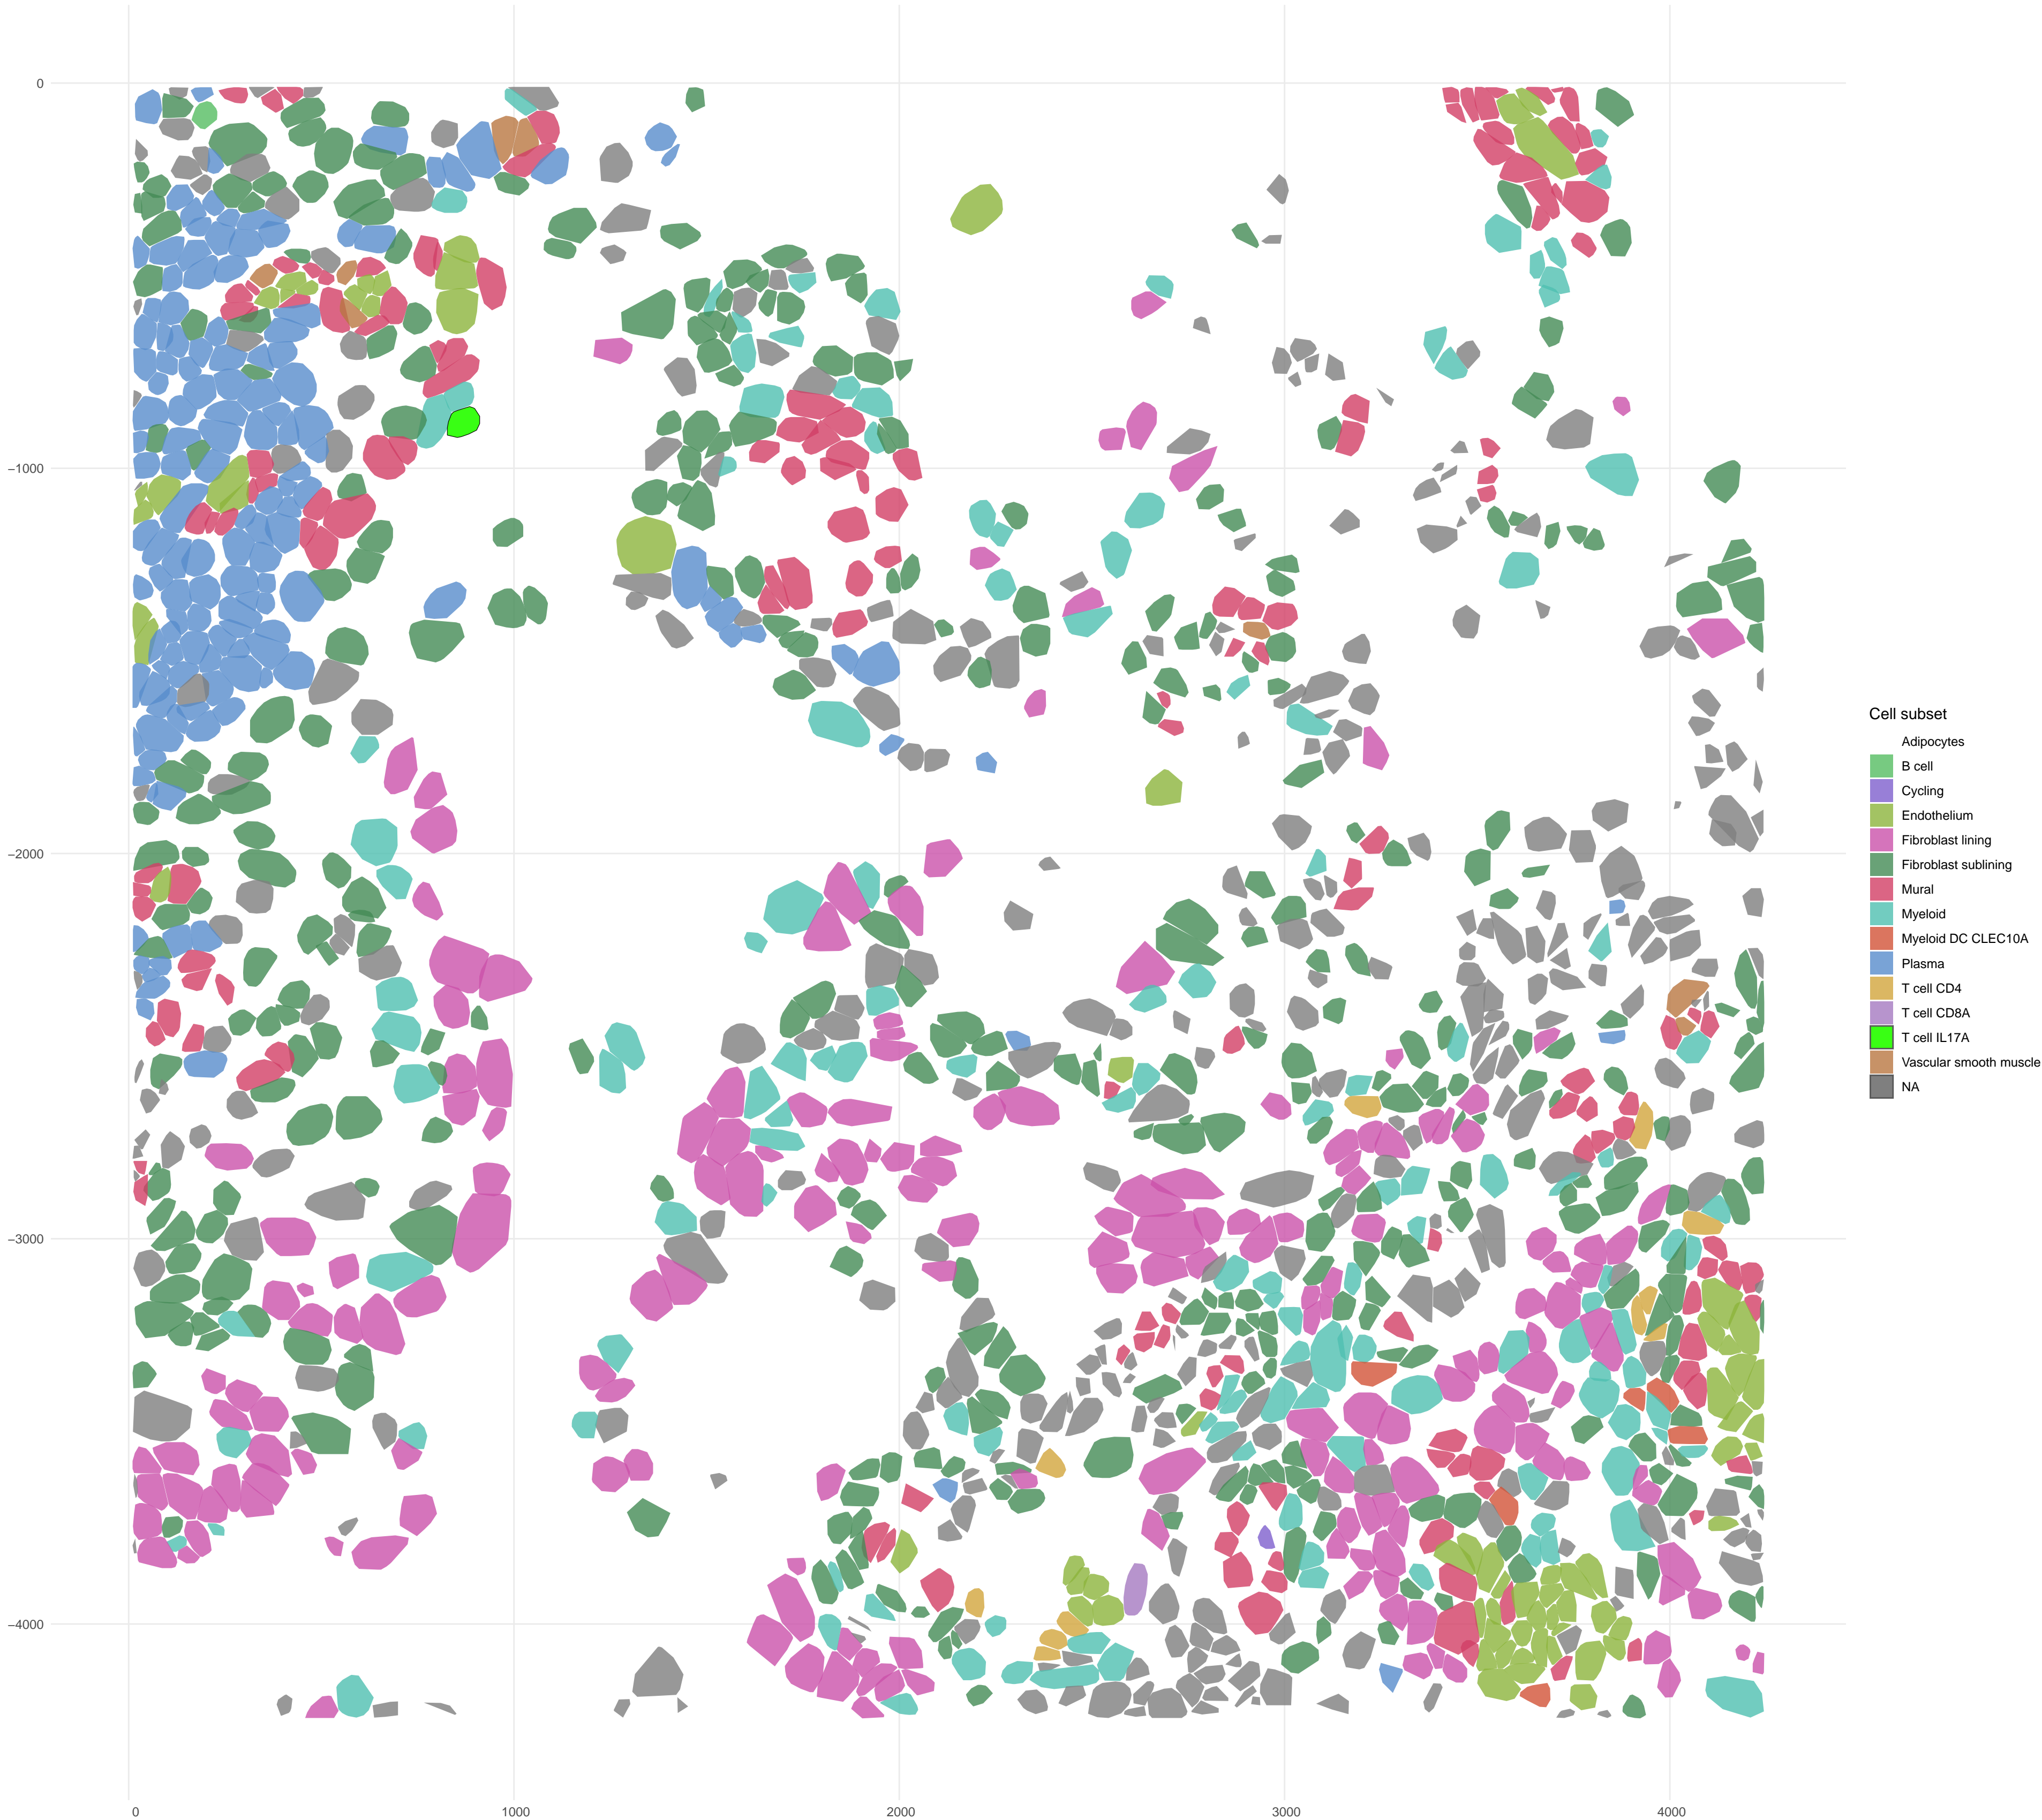

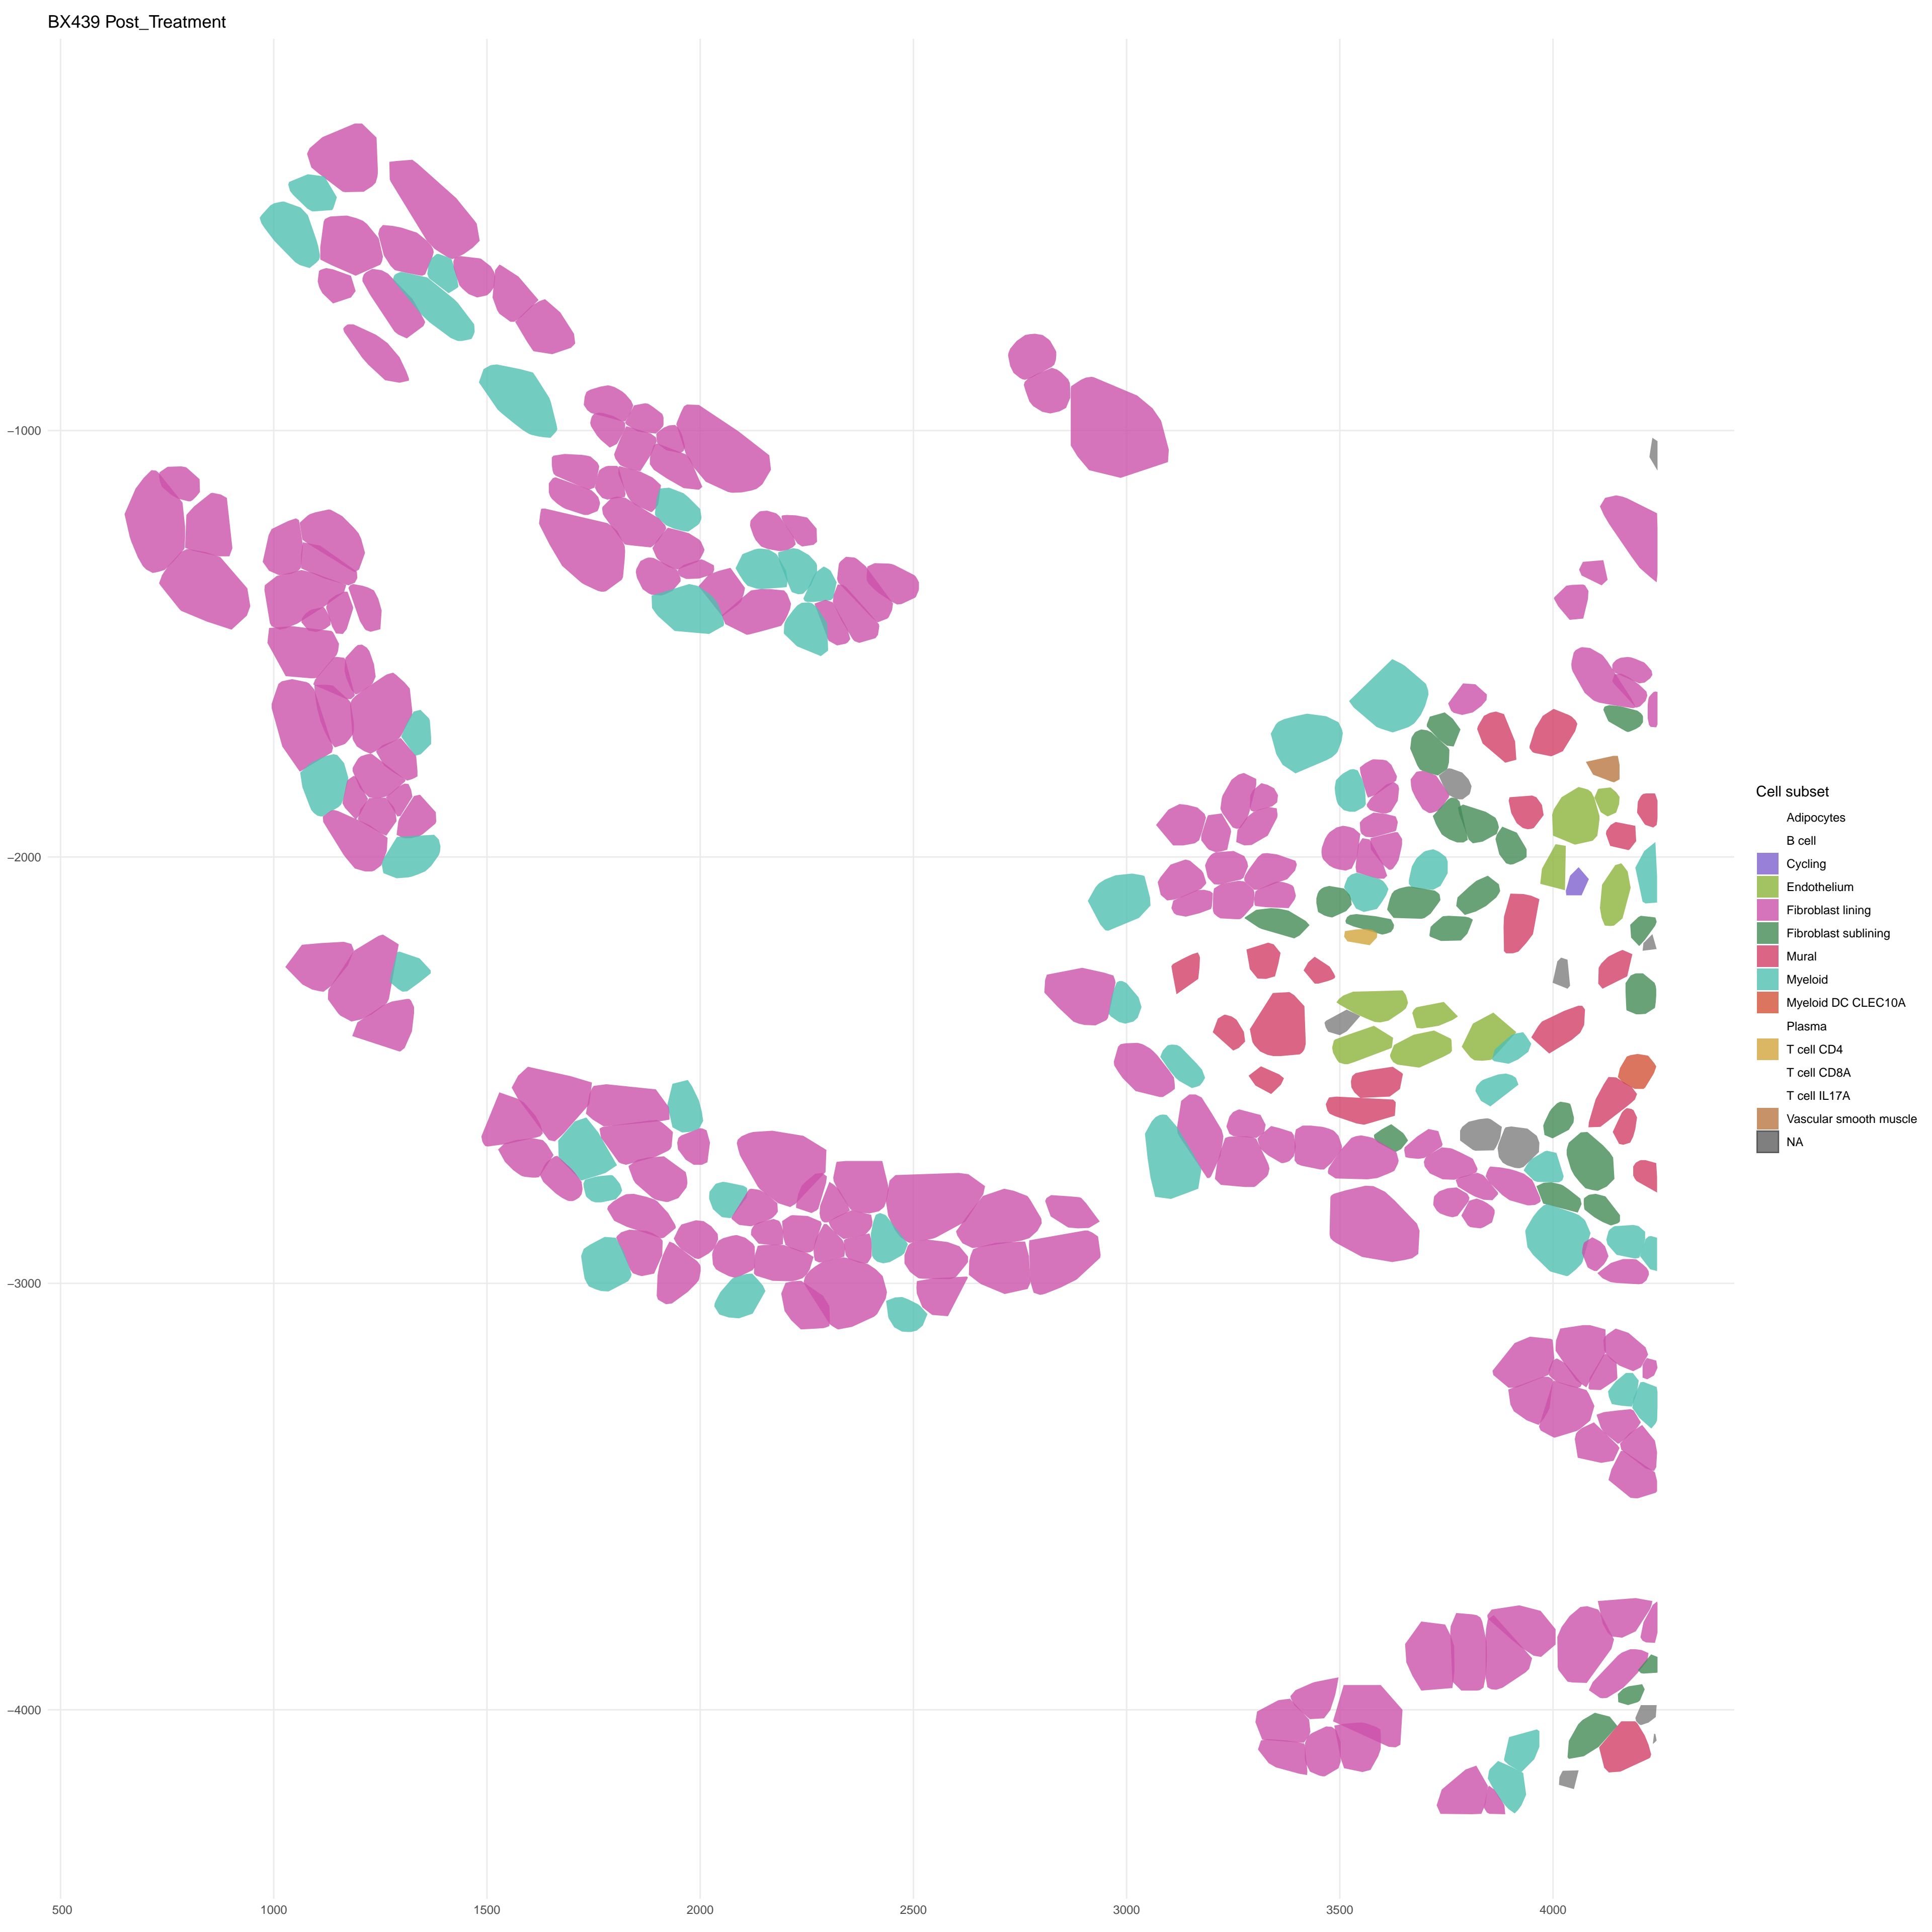

BX420 Baseline

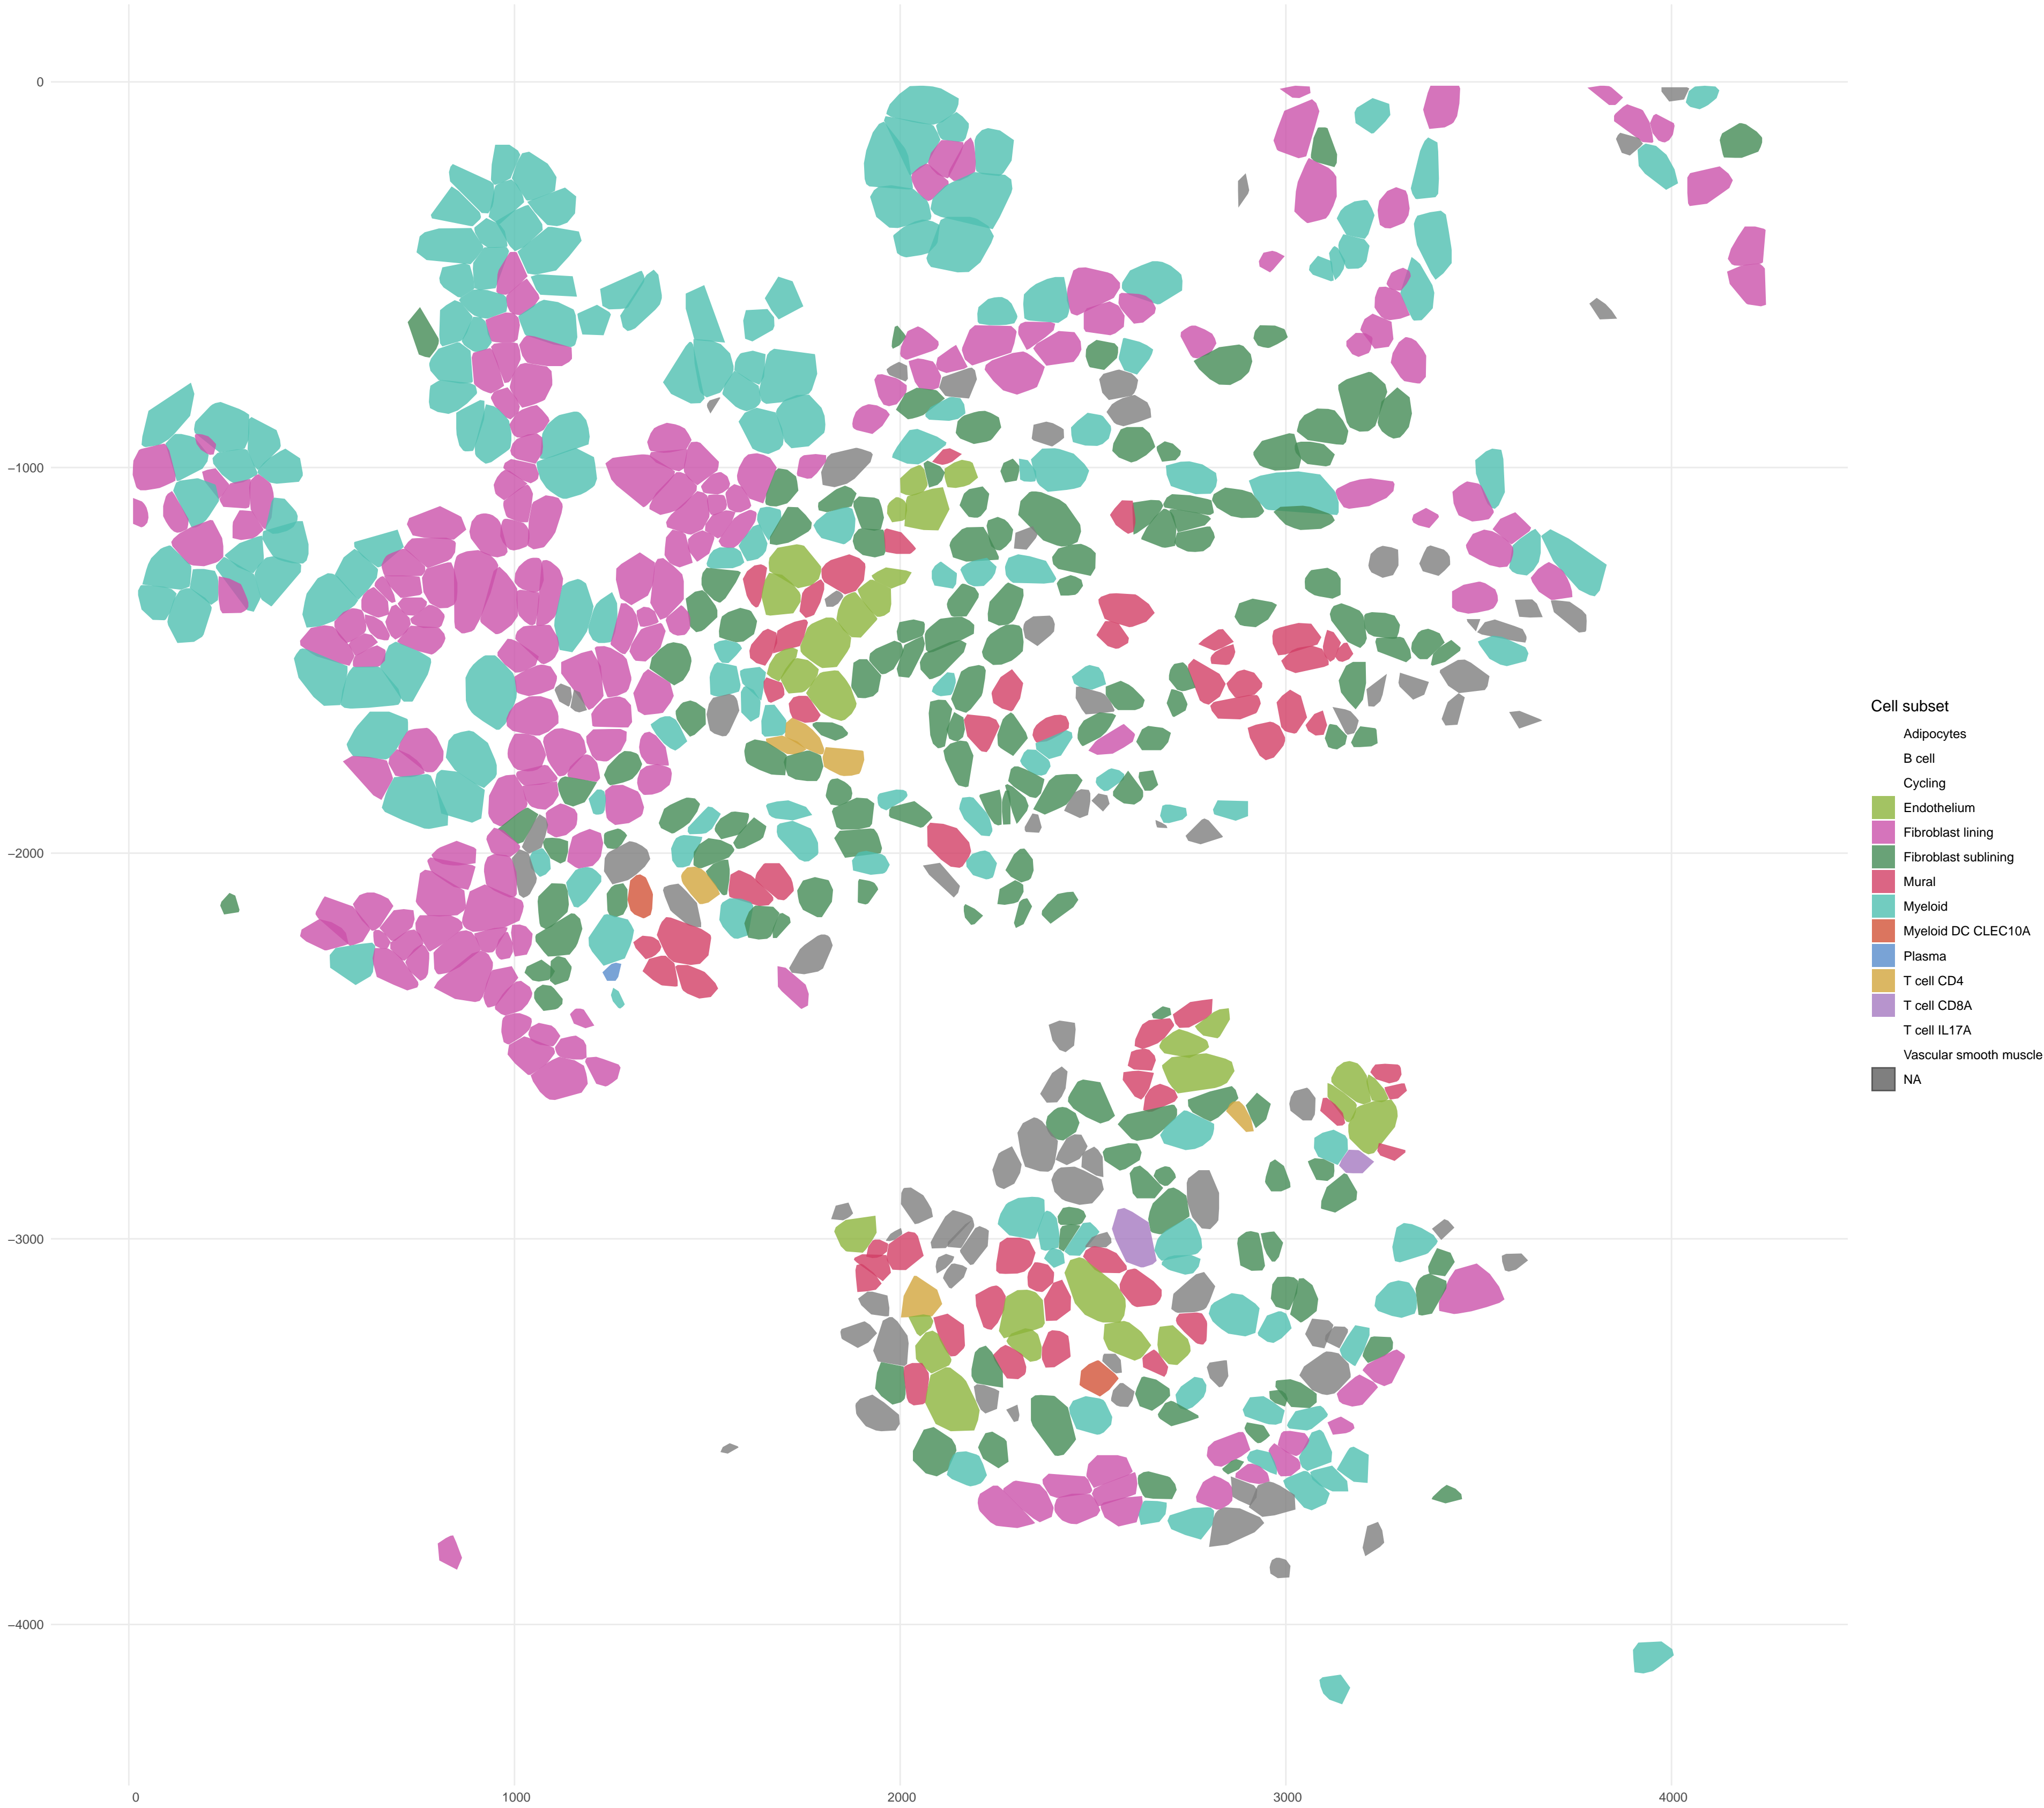



BX439 Post\_Treatment

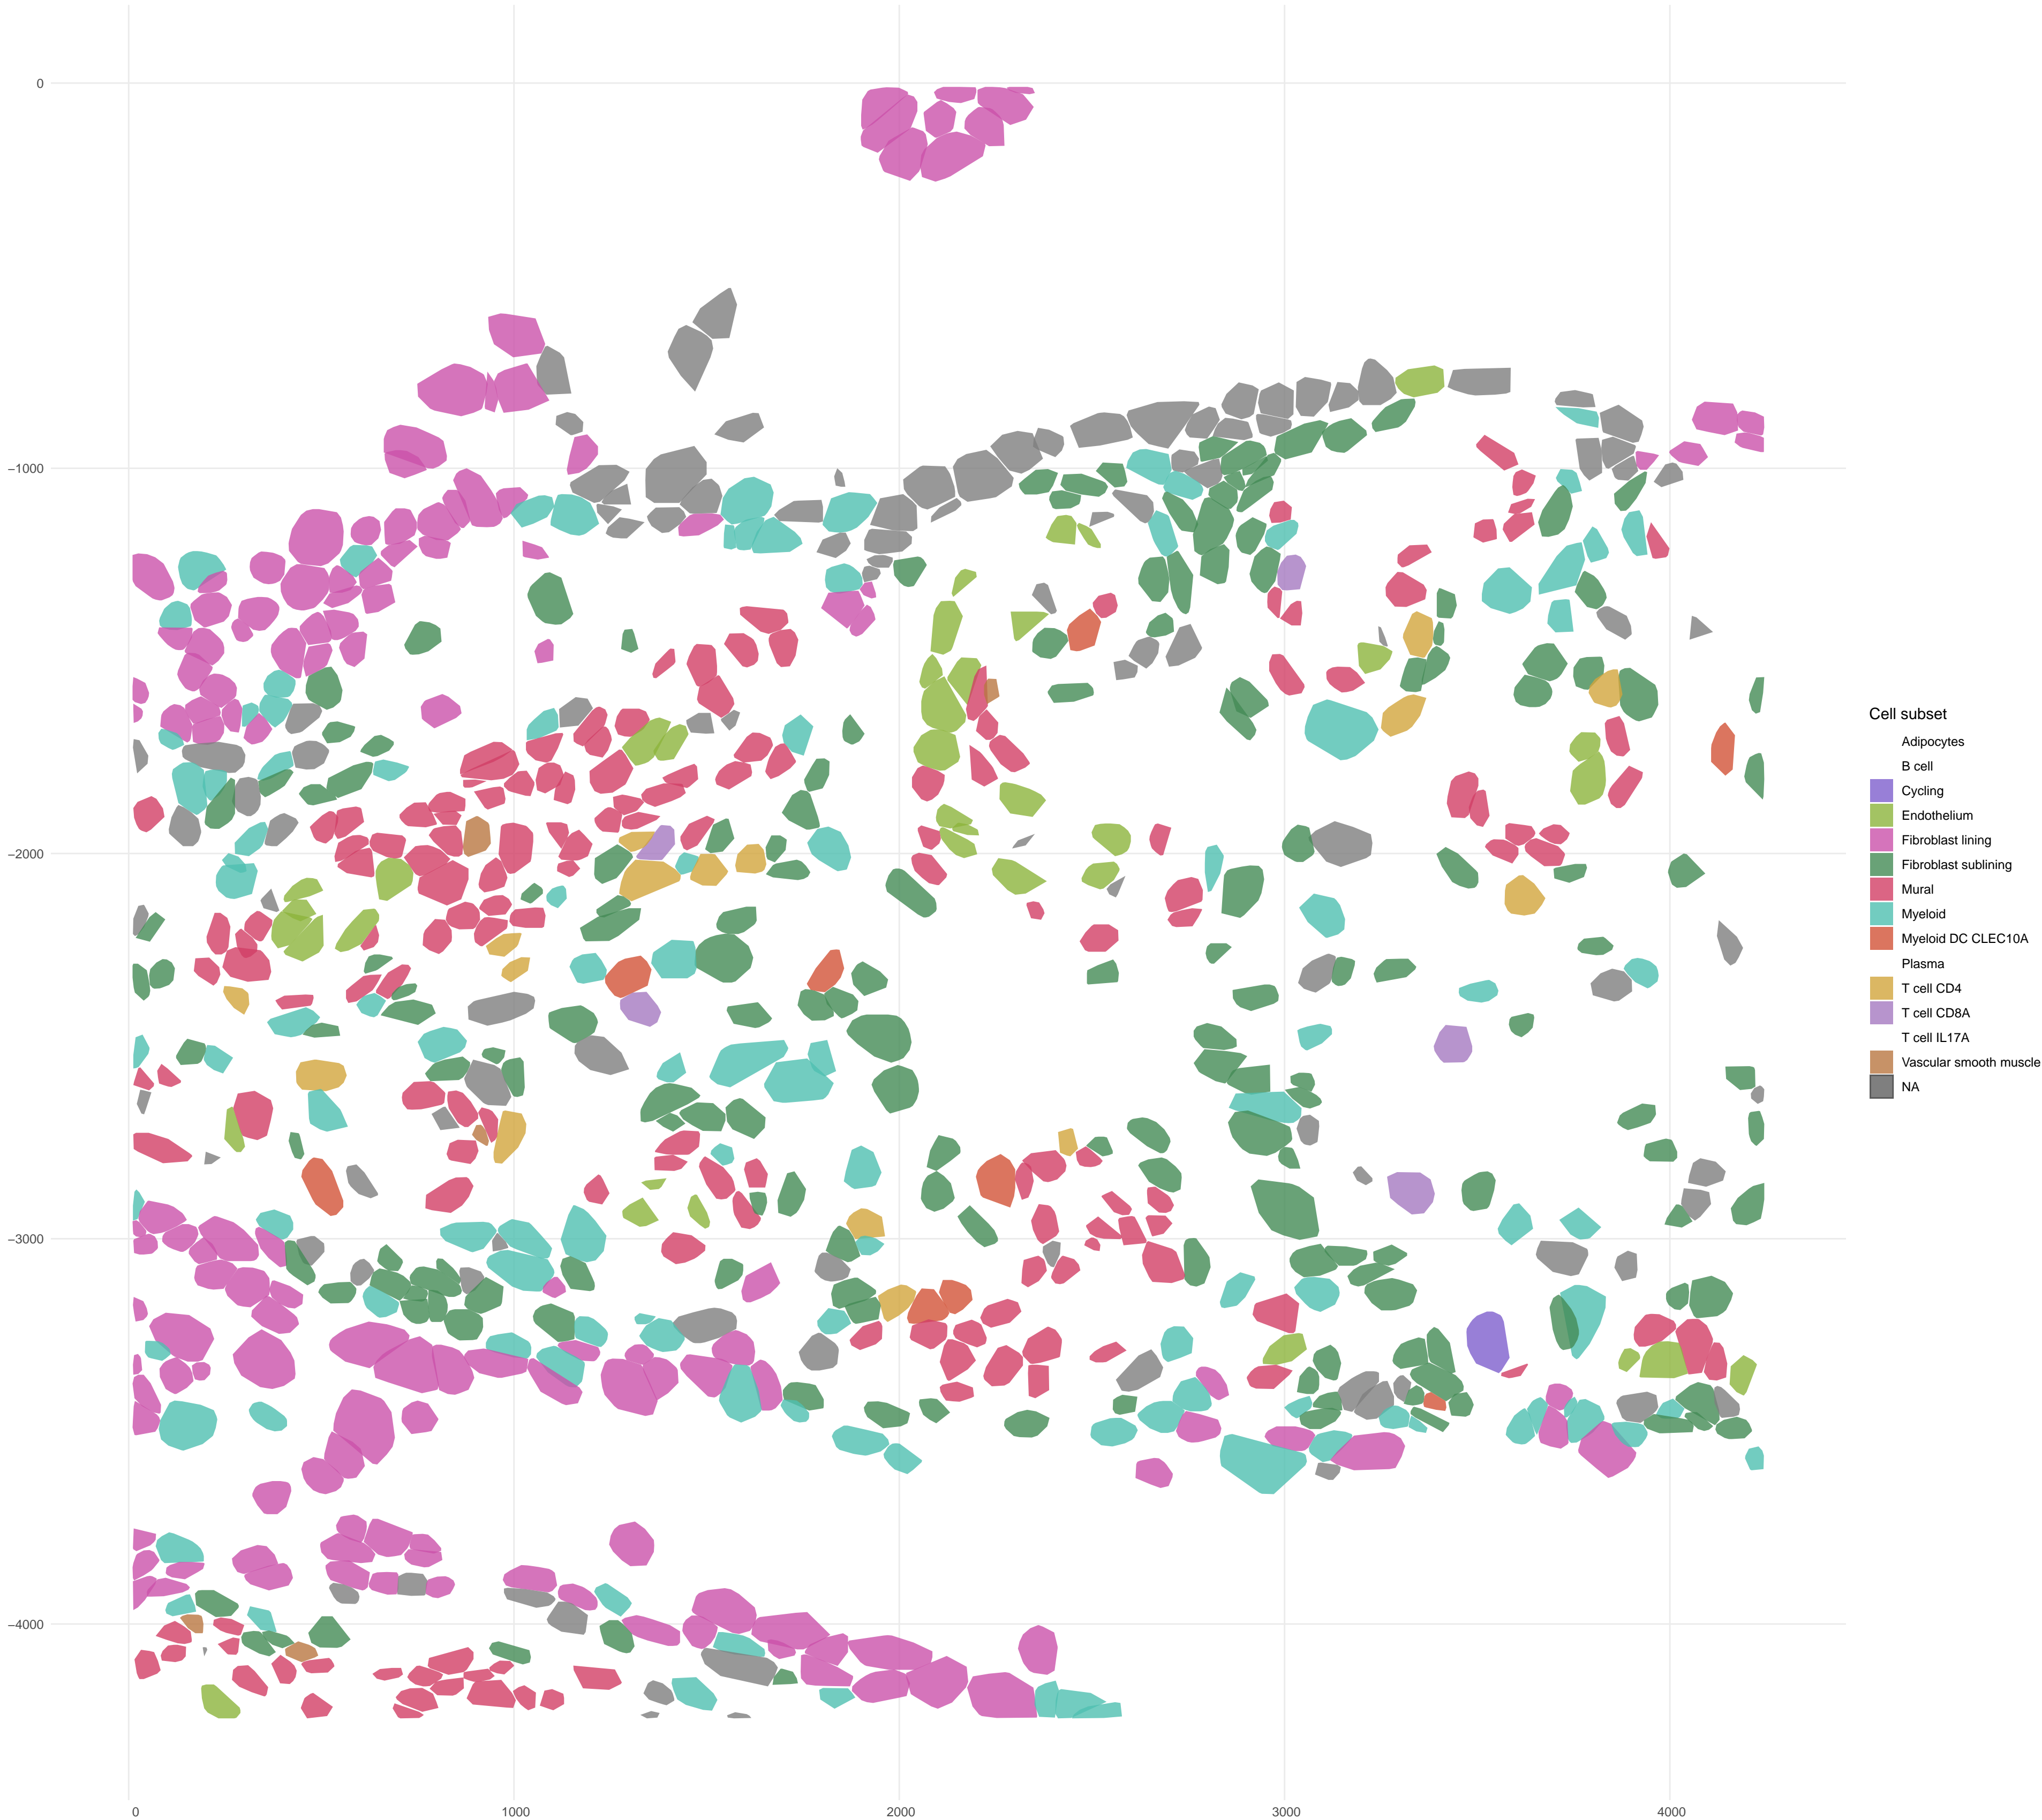

BX420 Baseline

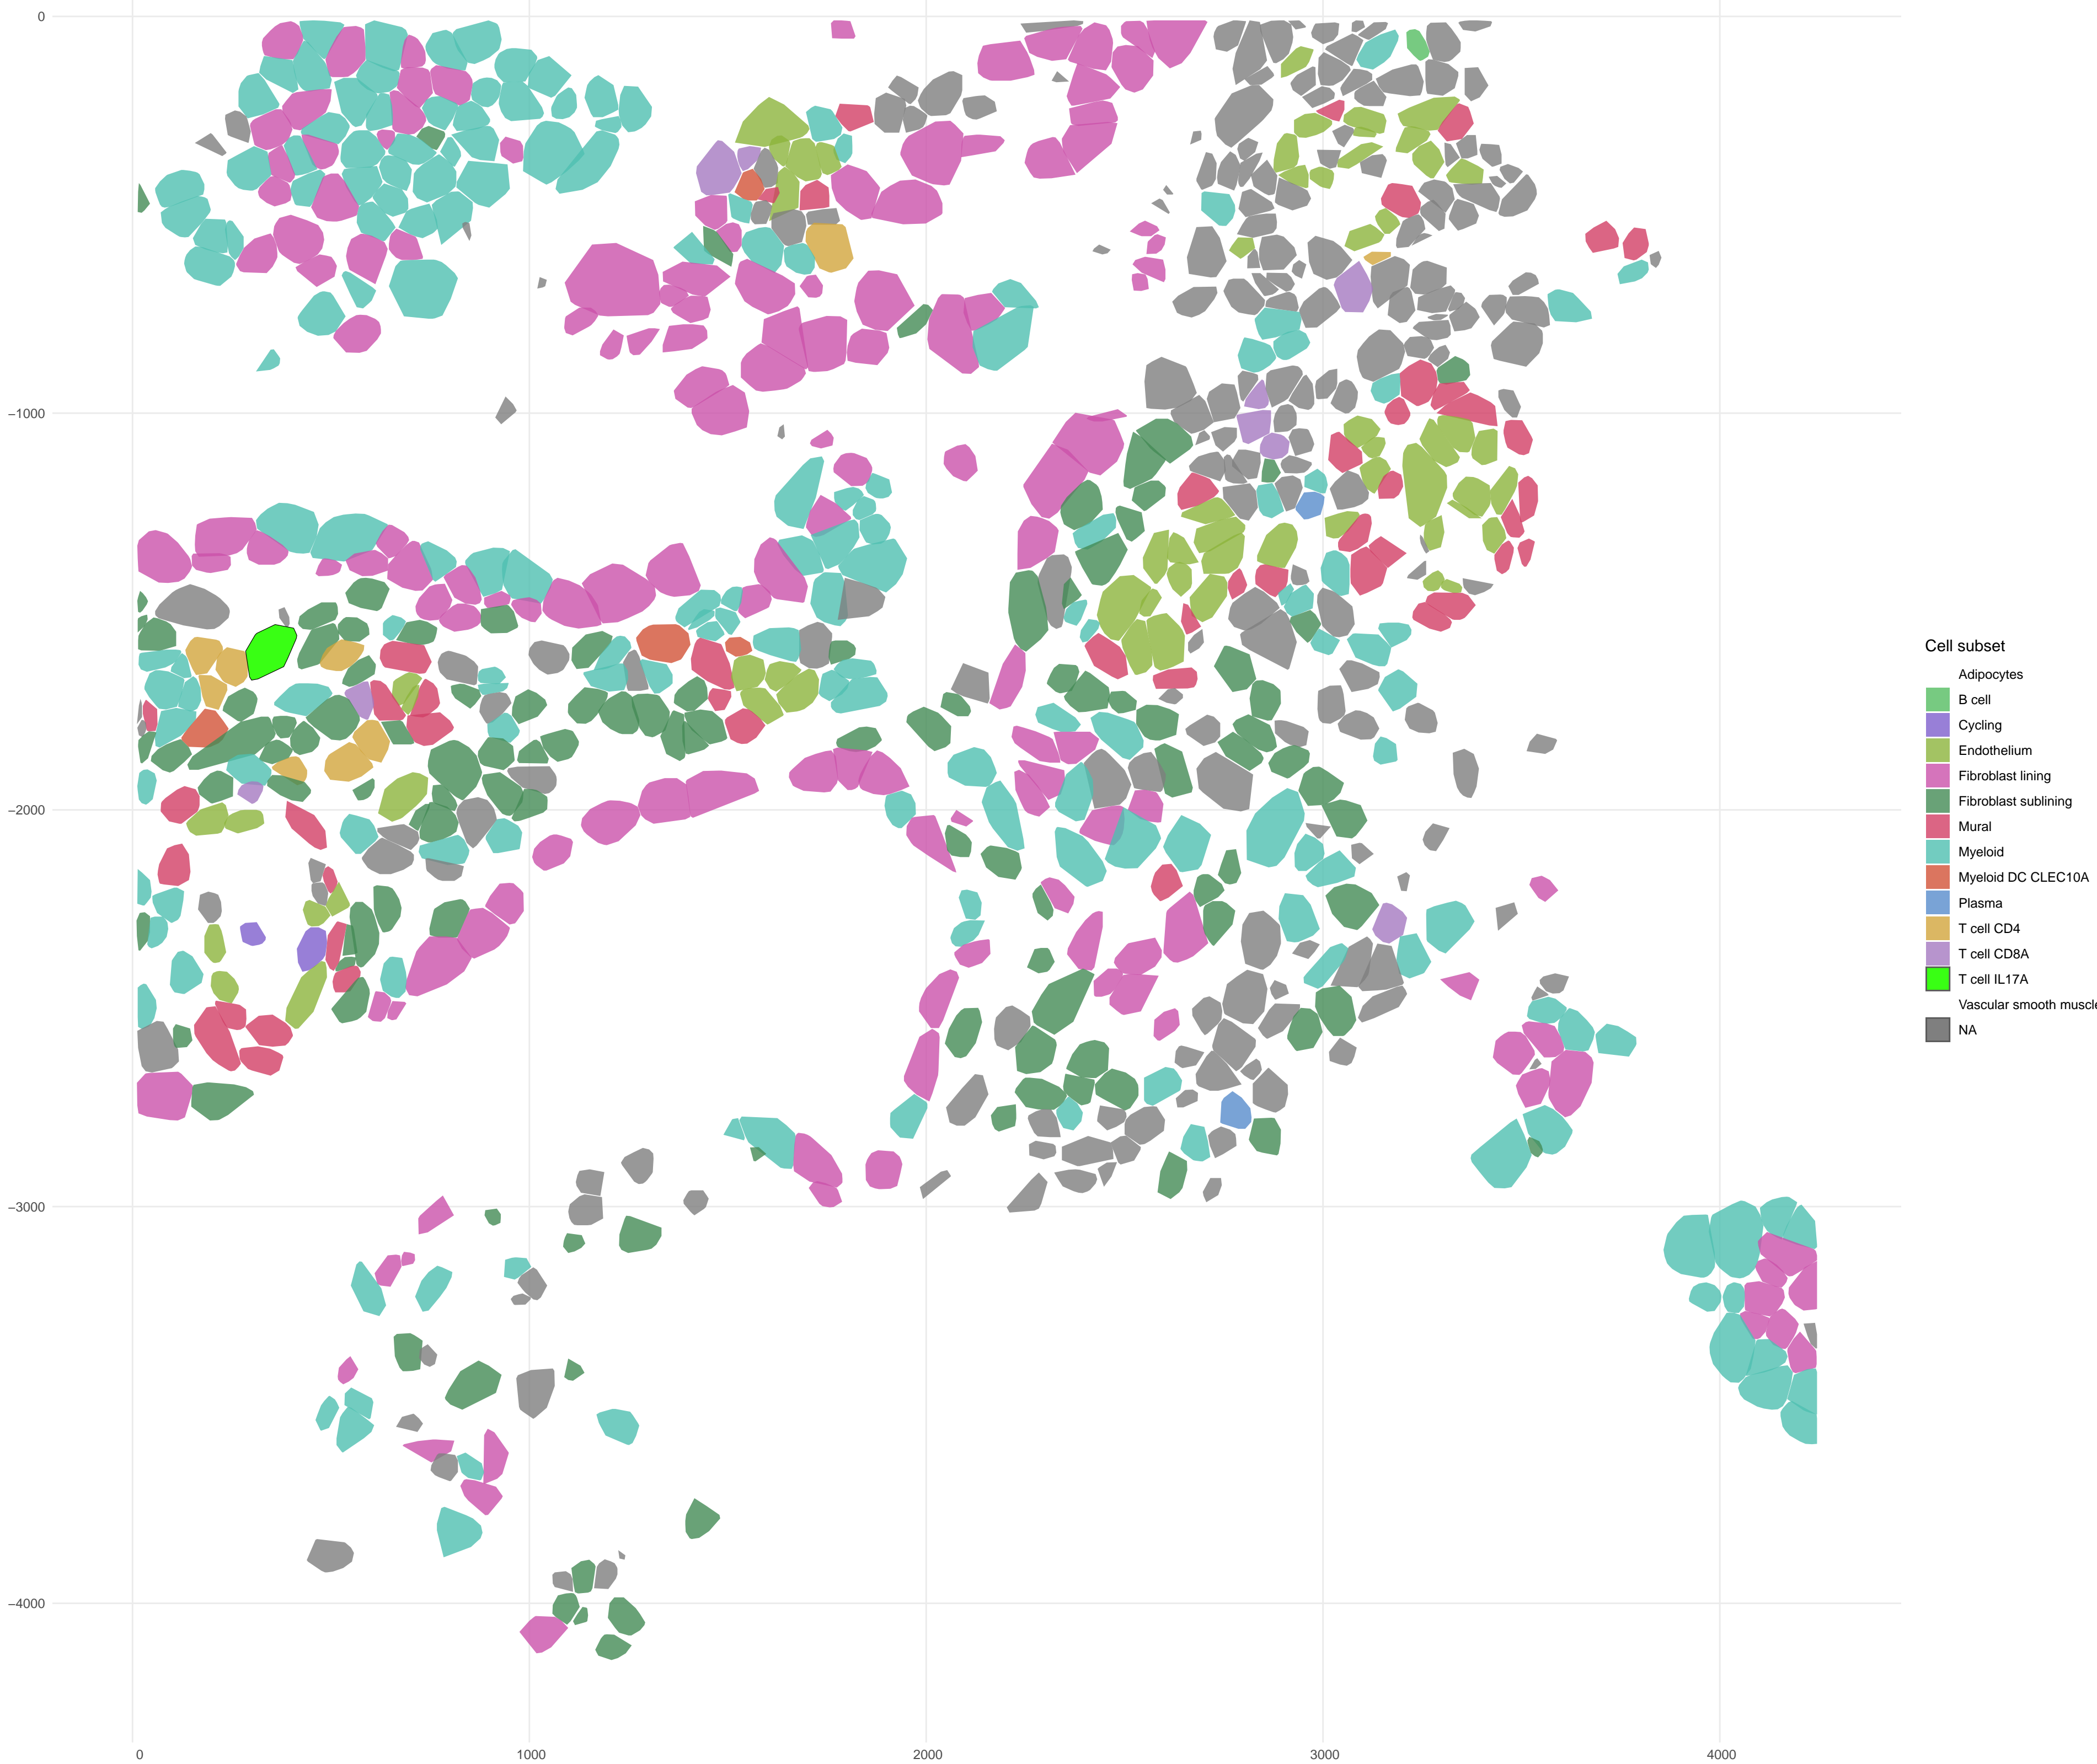

BX439 Post\_Treatment

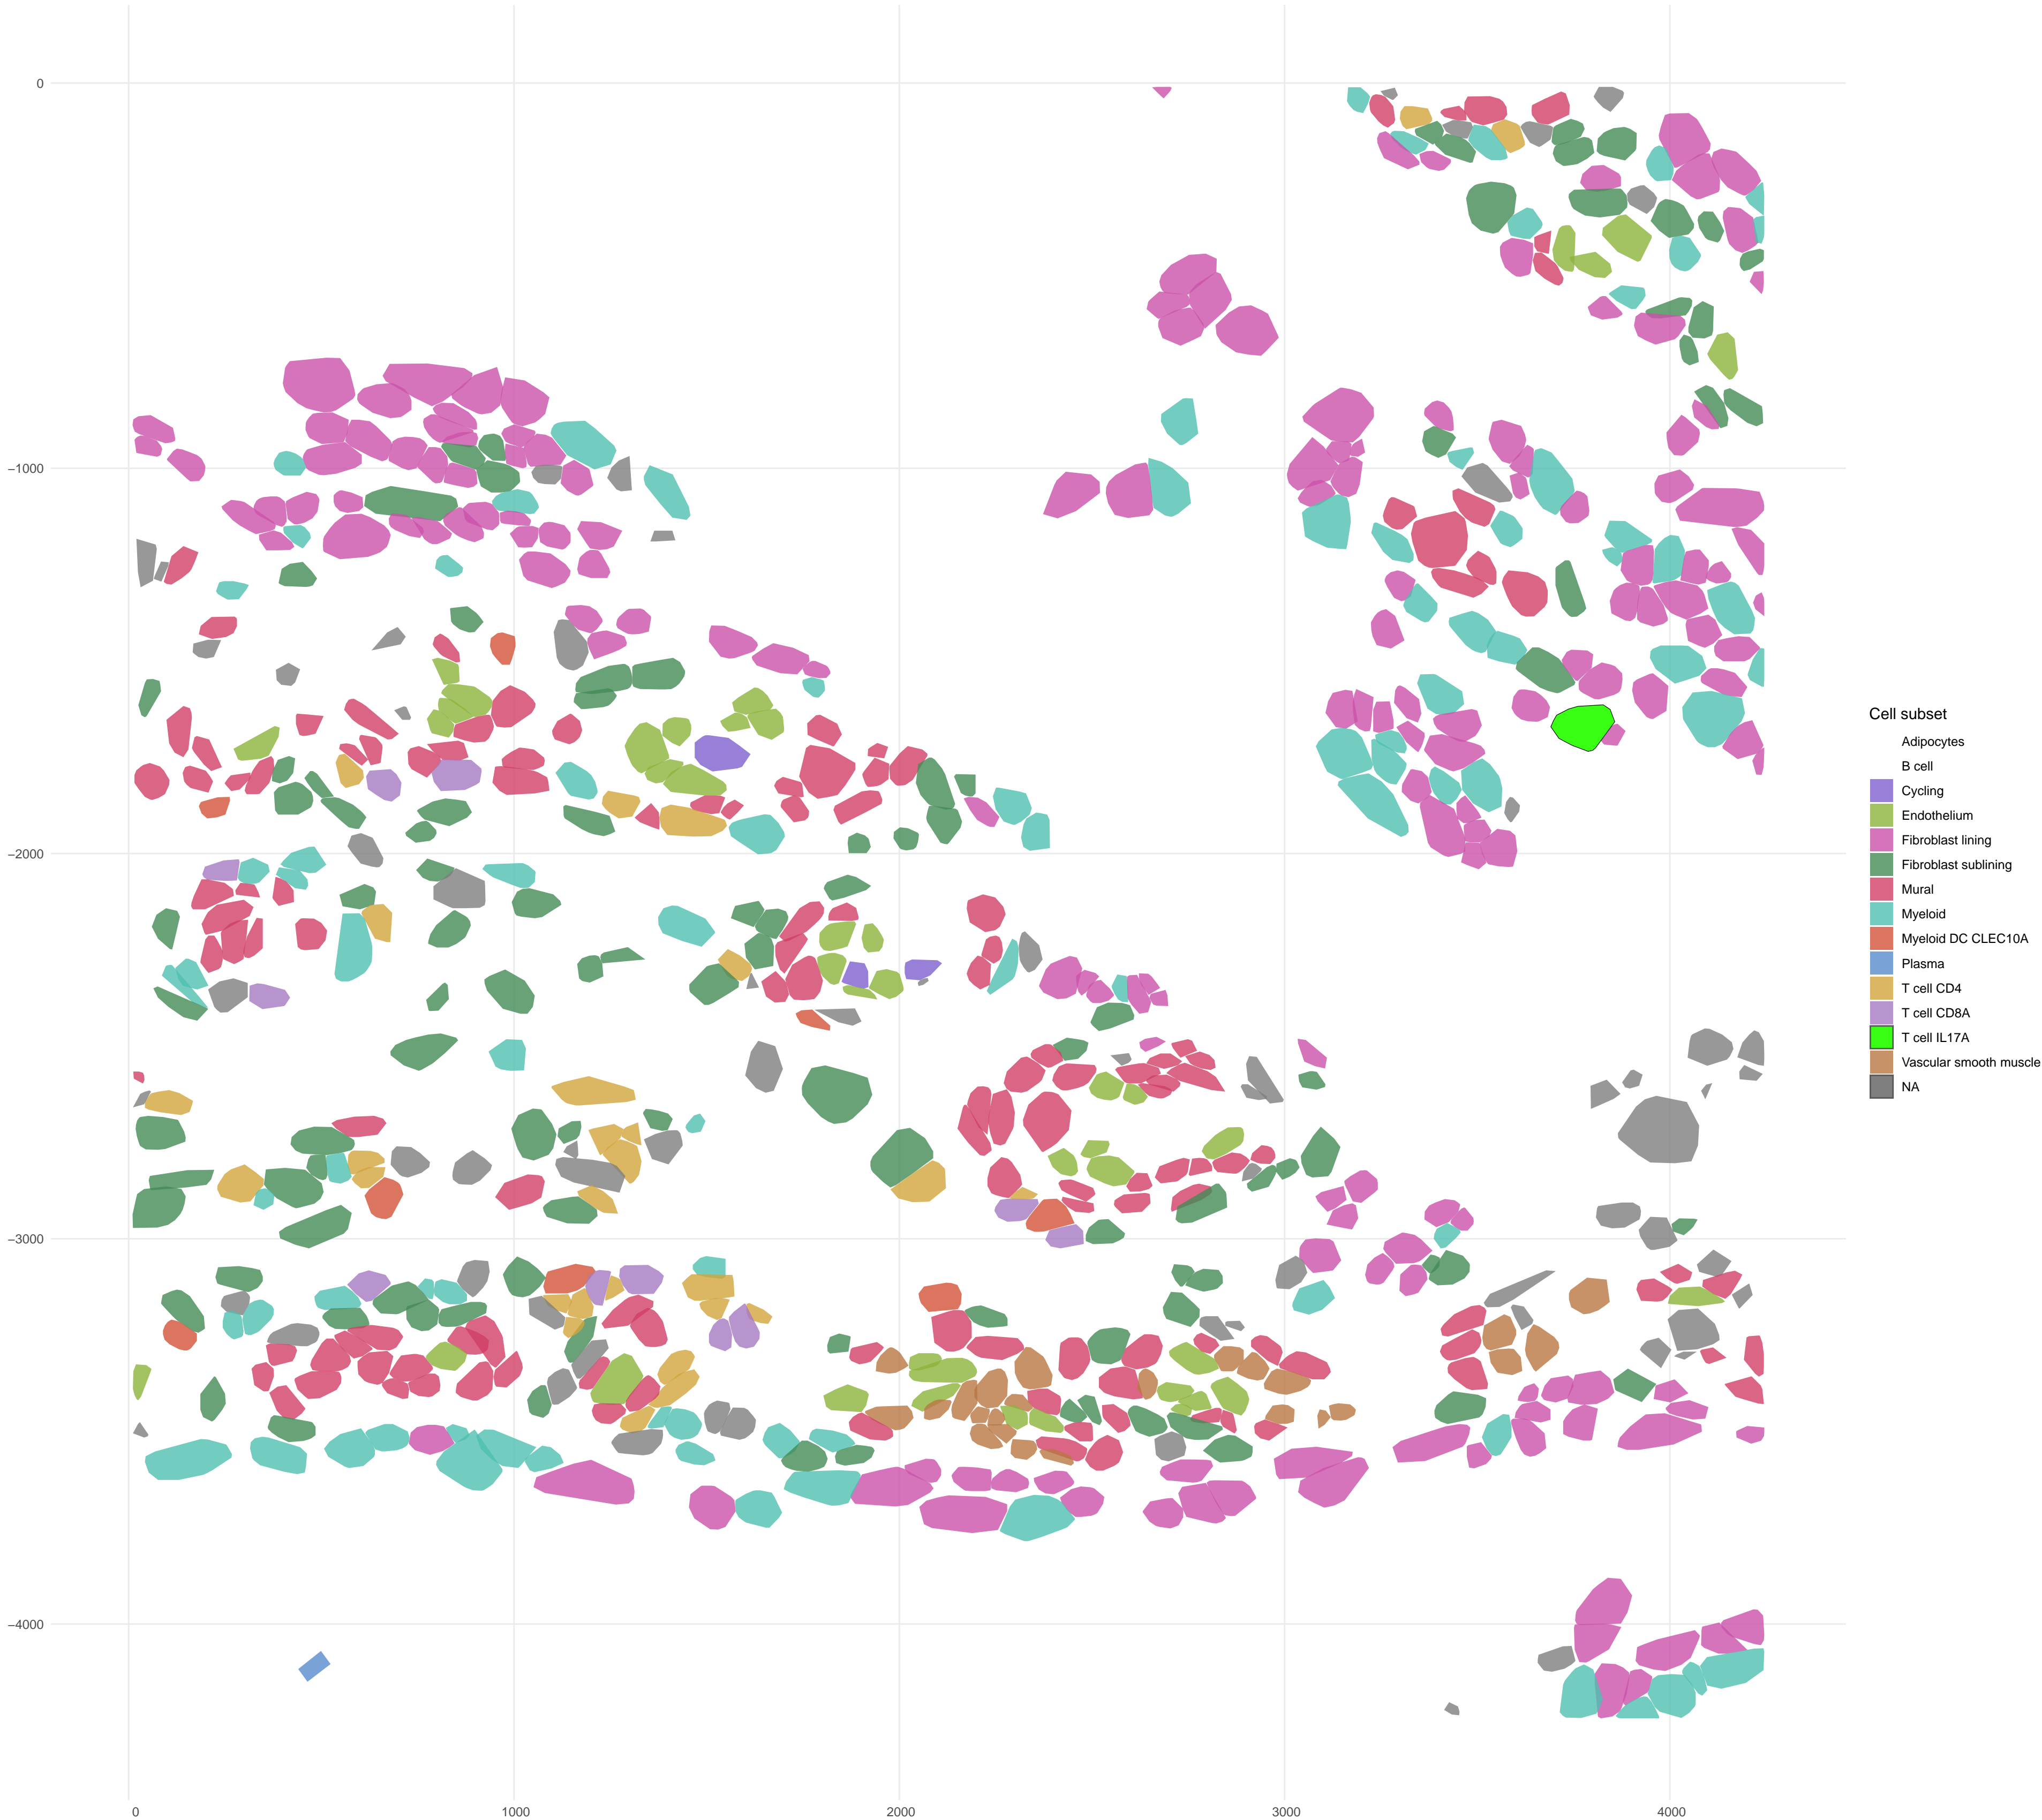



BX420 Baseline

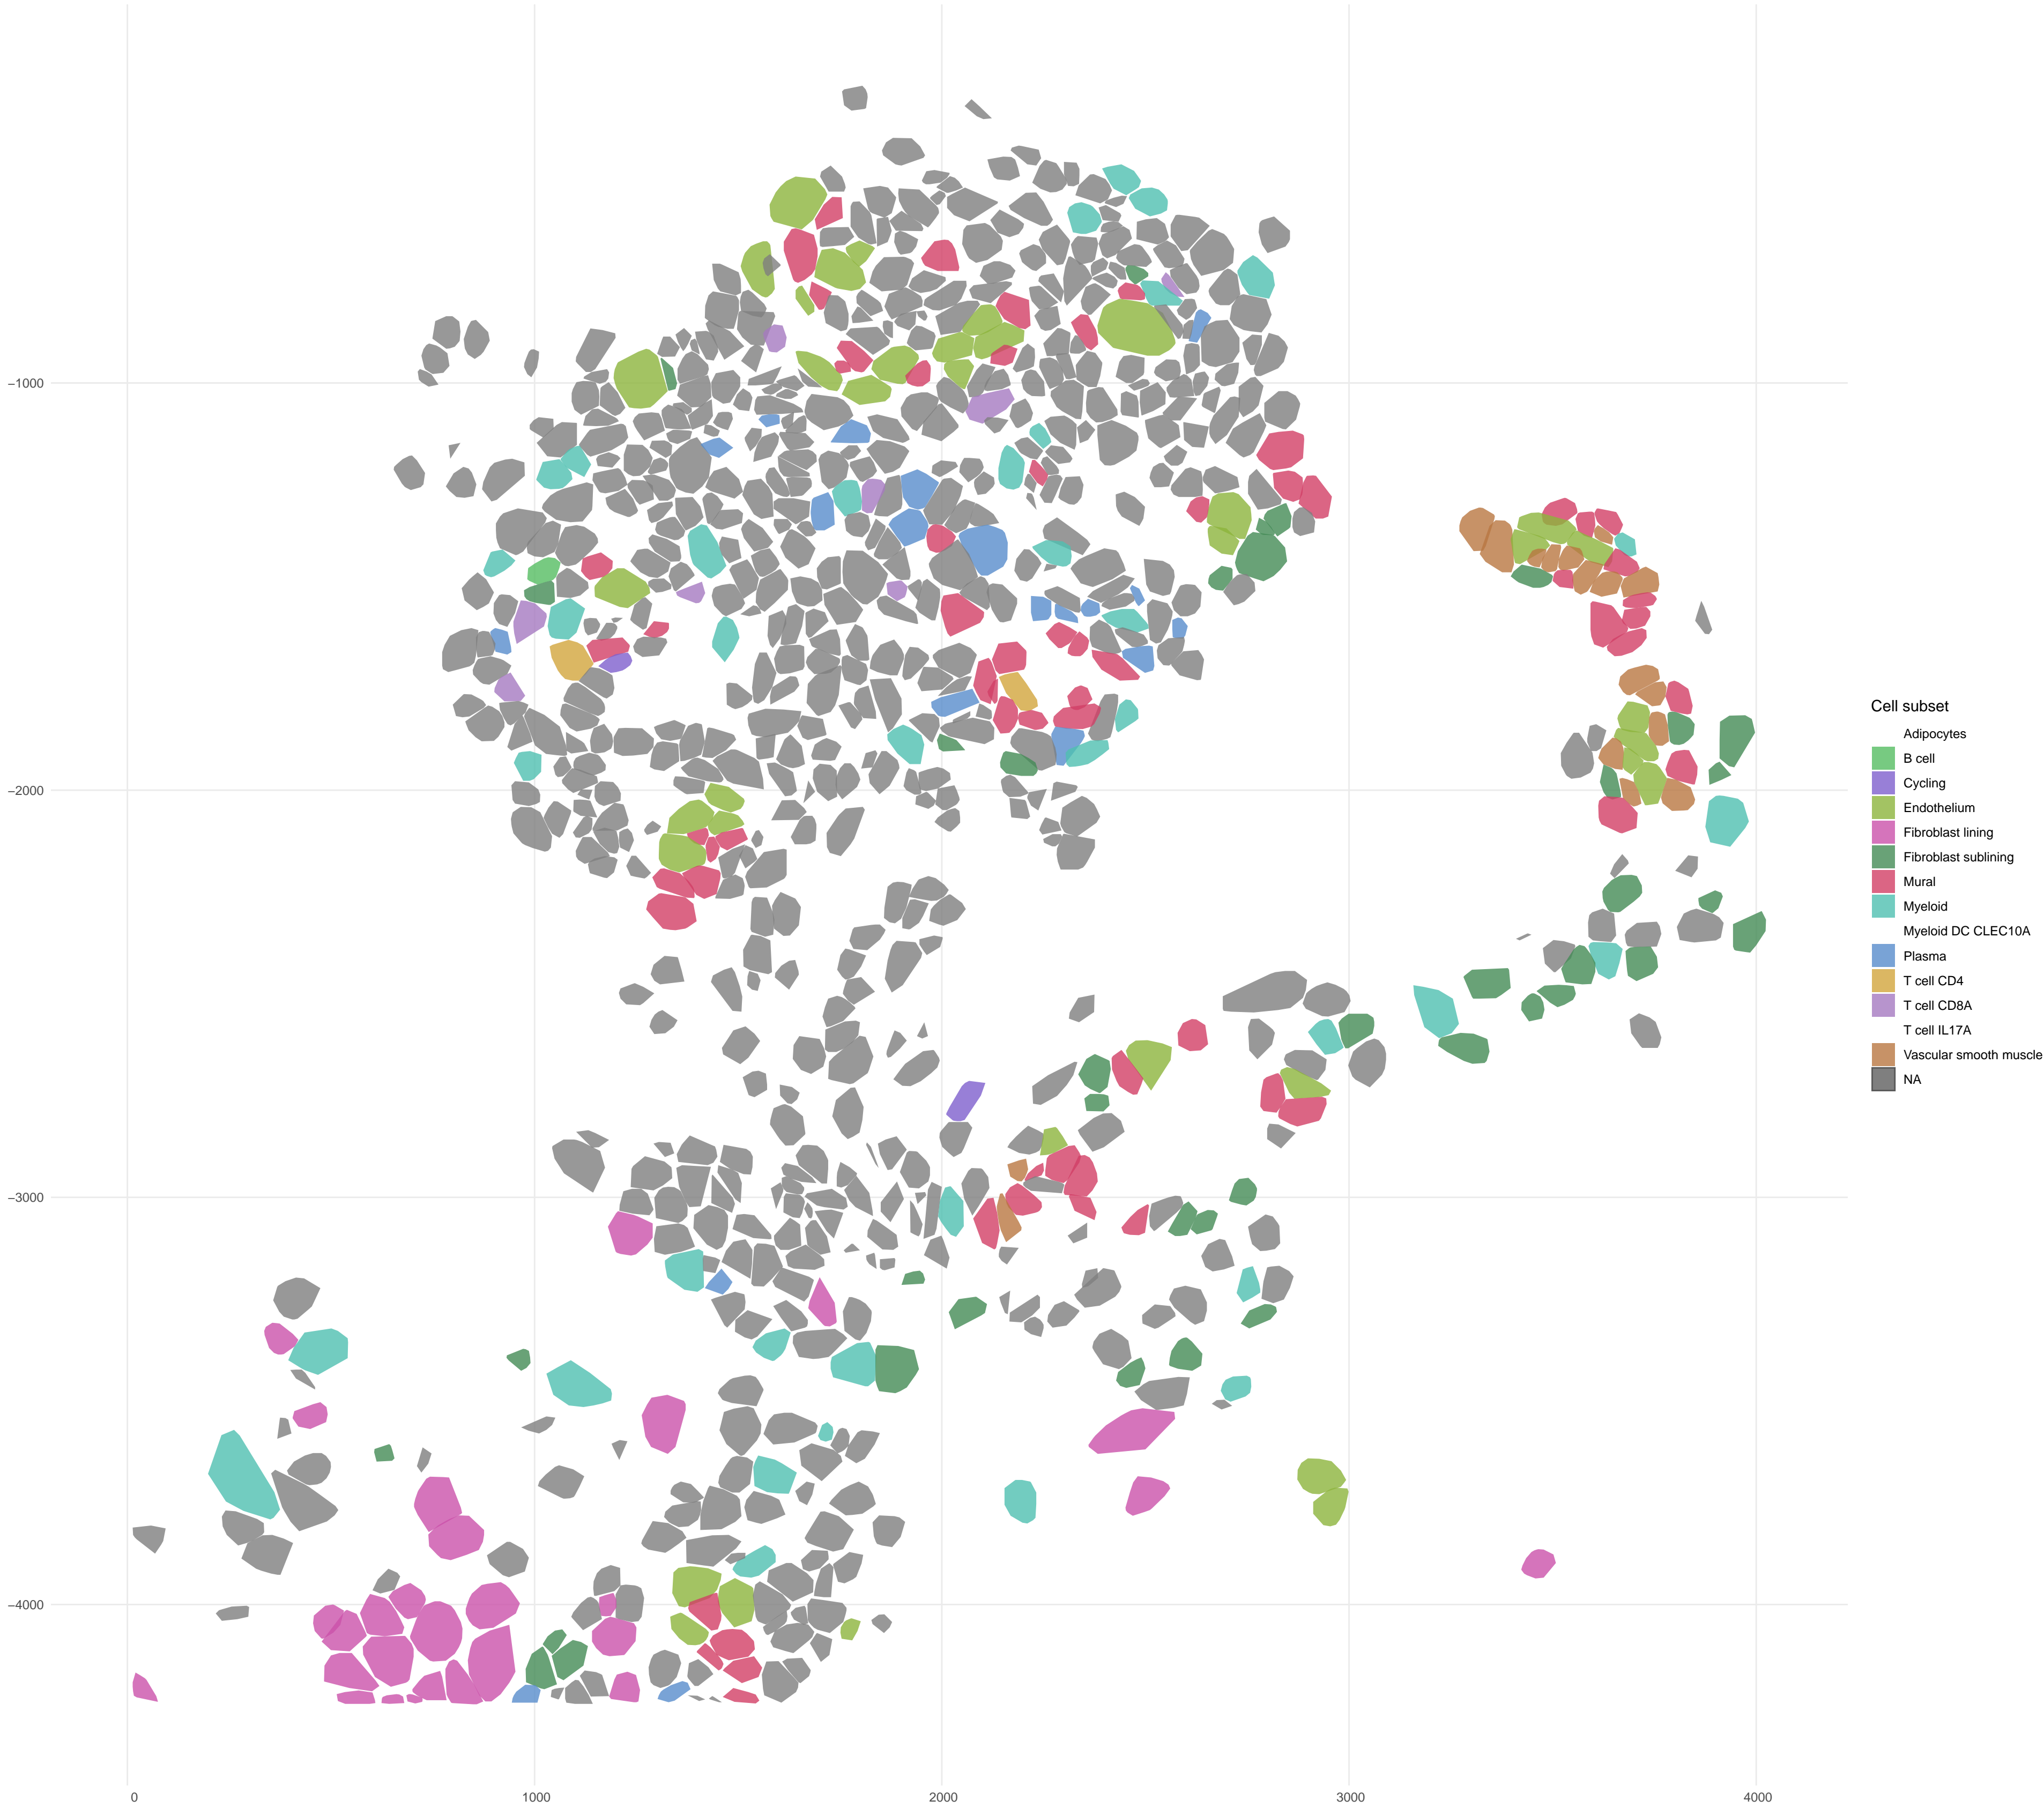

BX439 Post\_Treatment

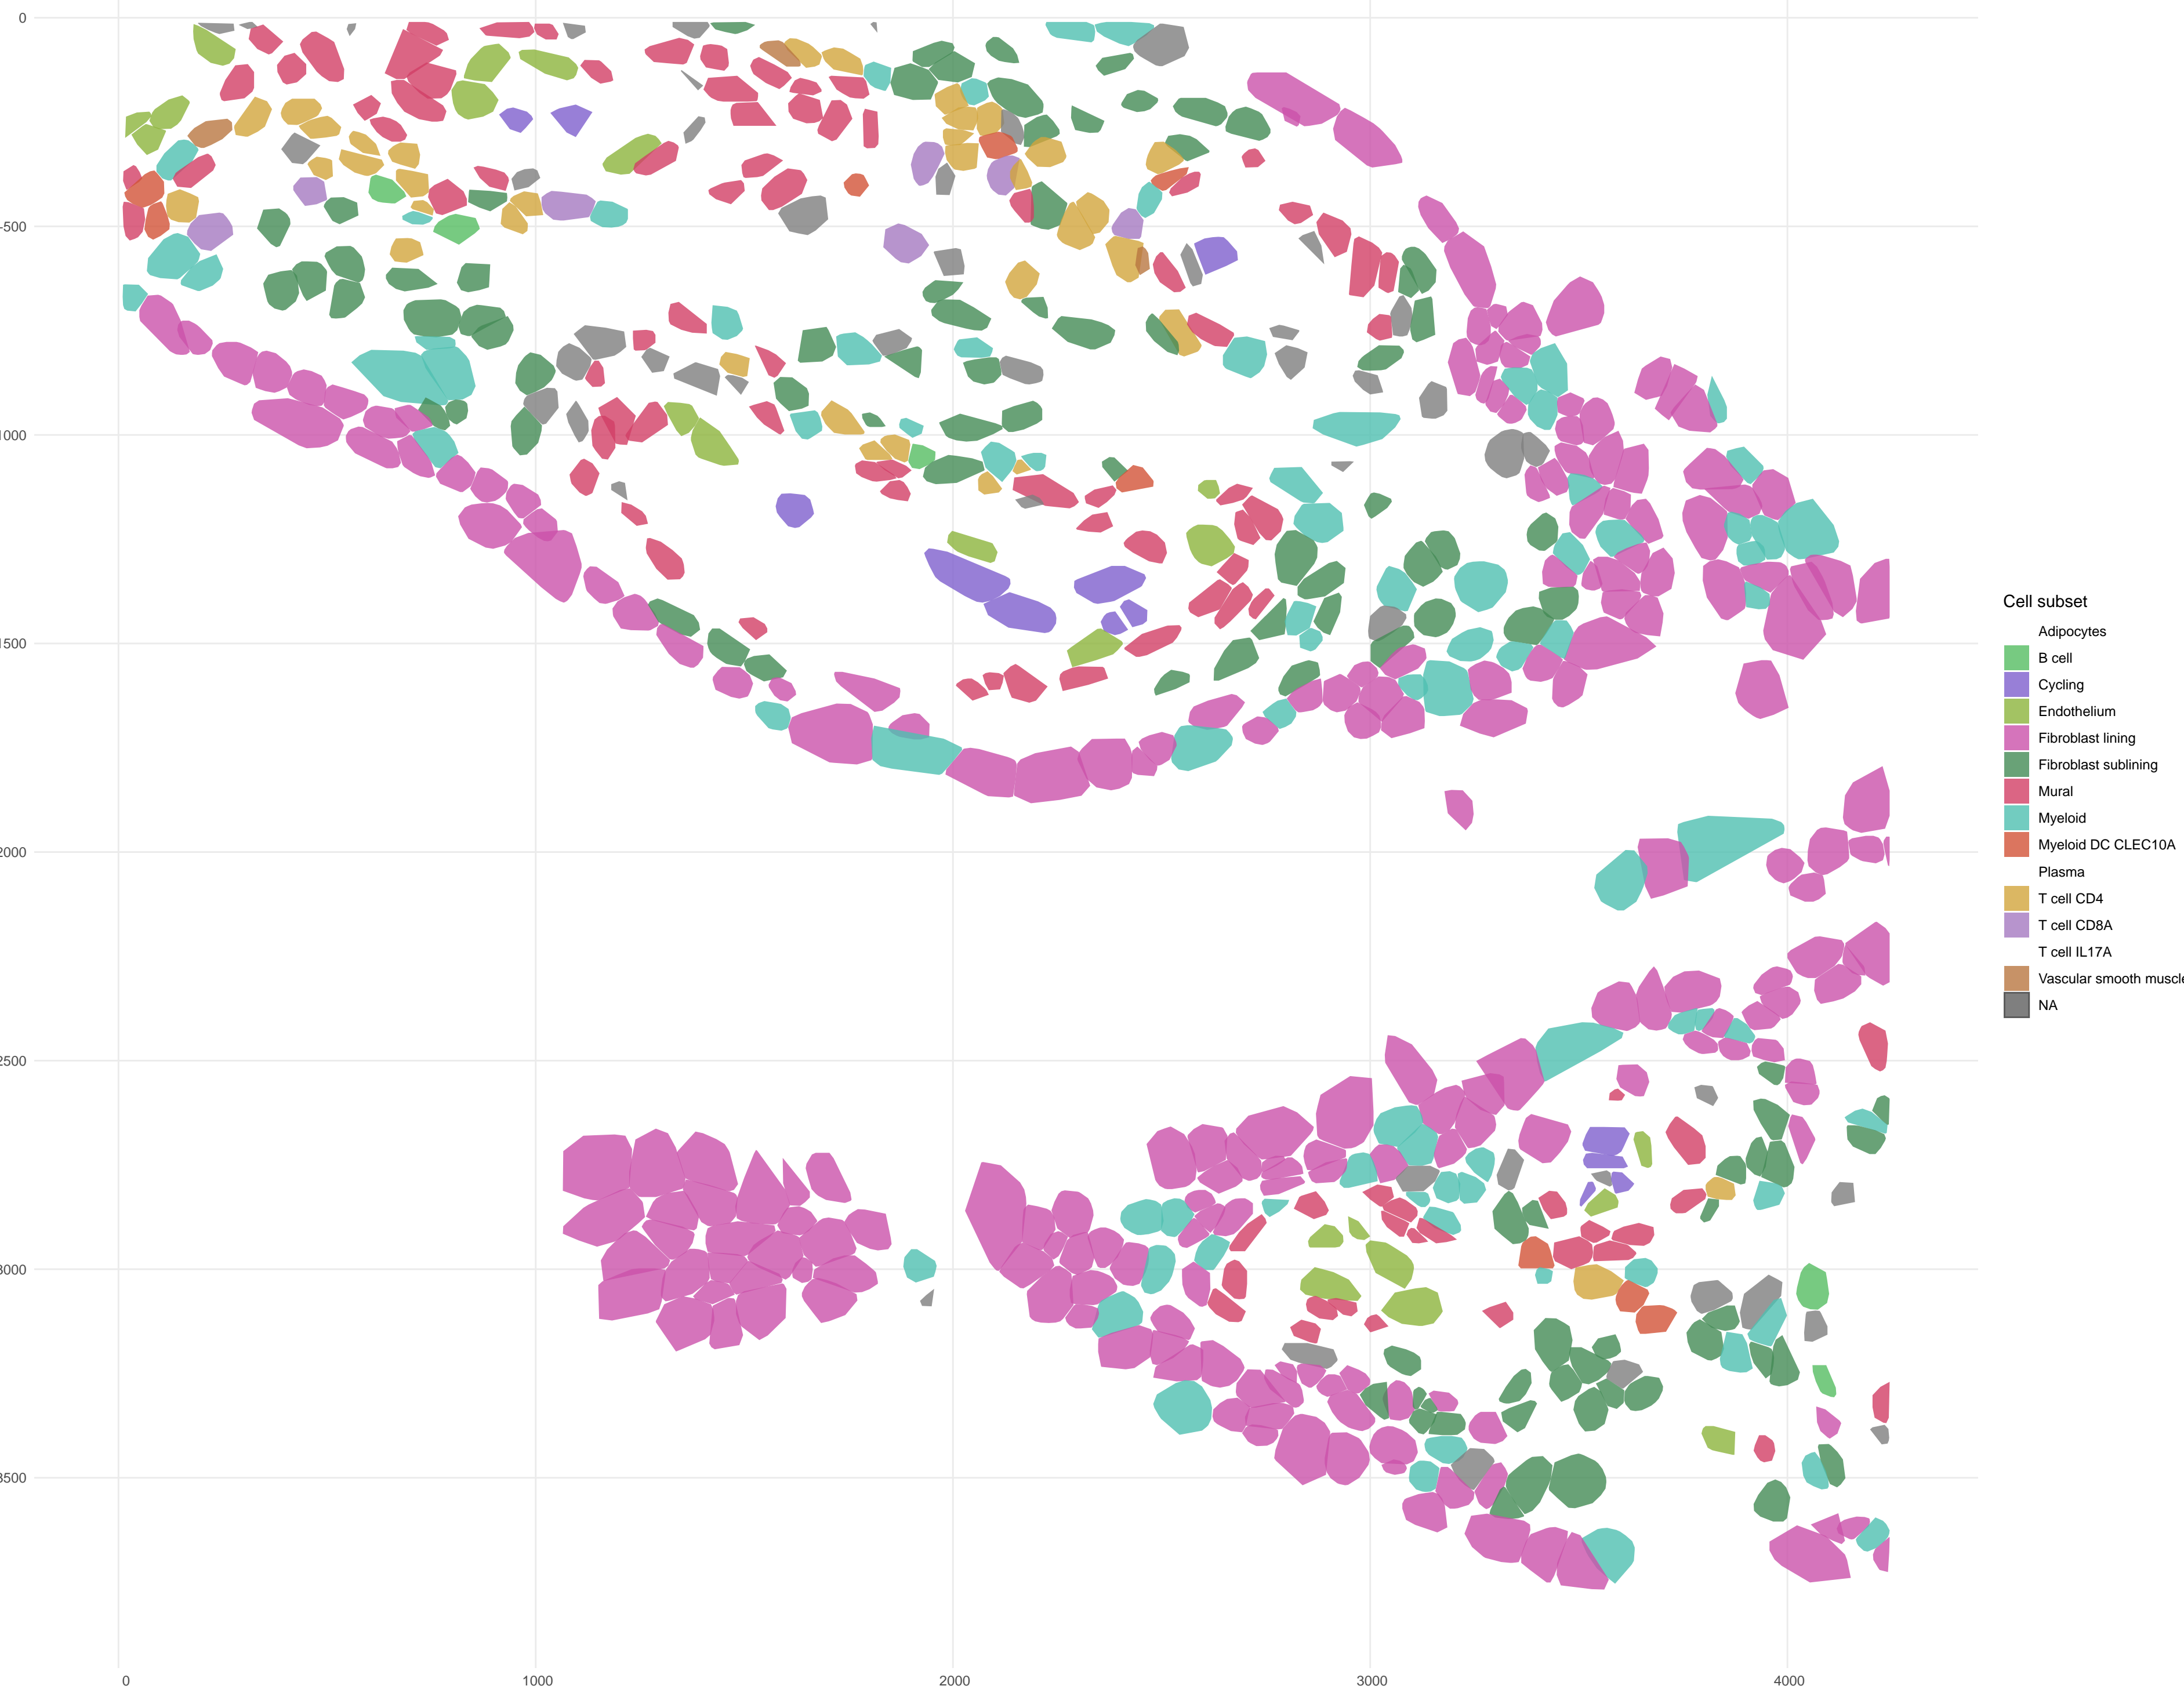

BX420 Baseline

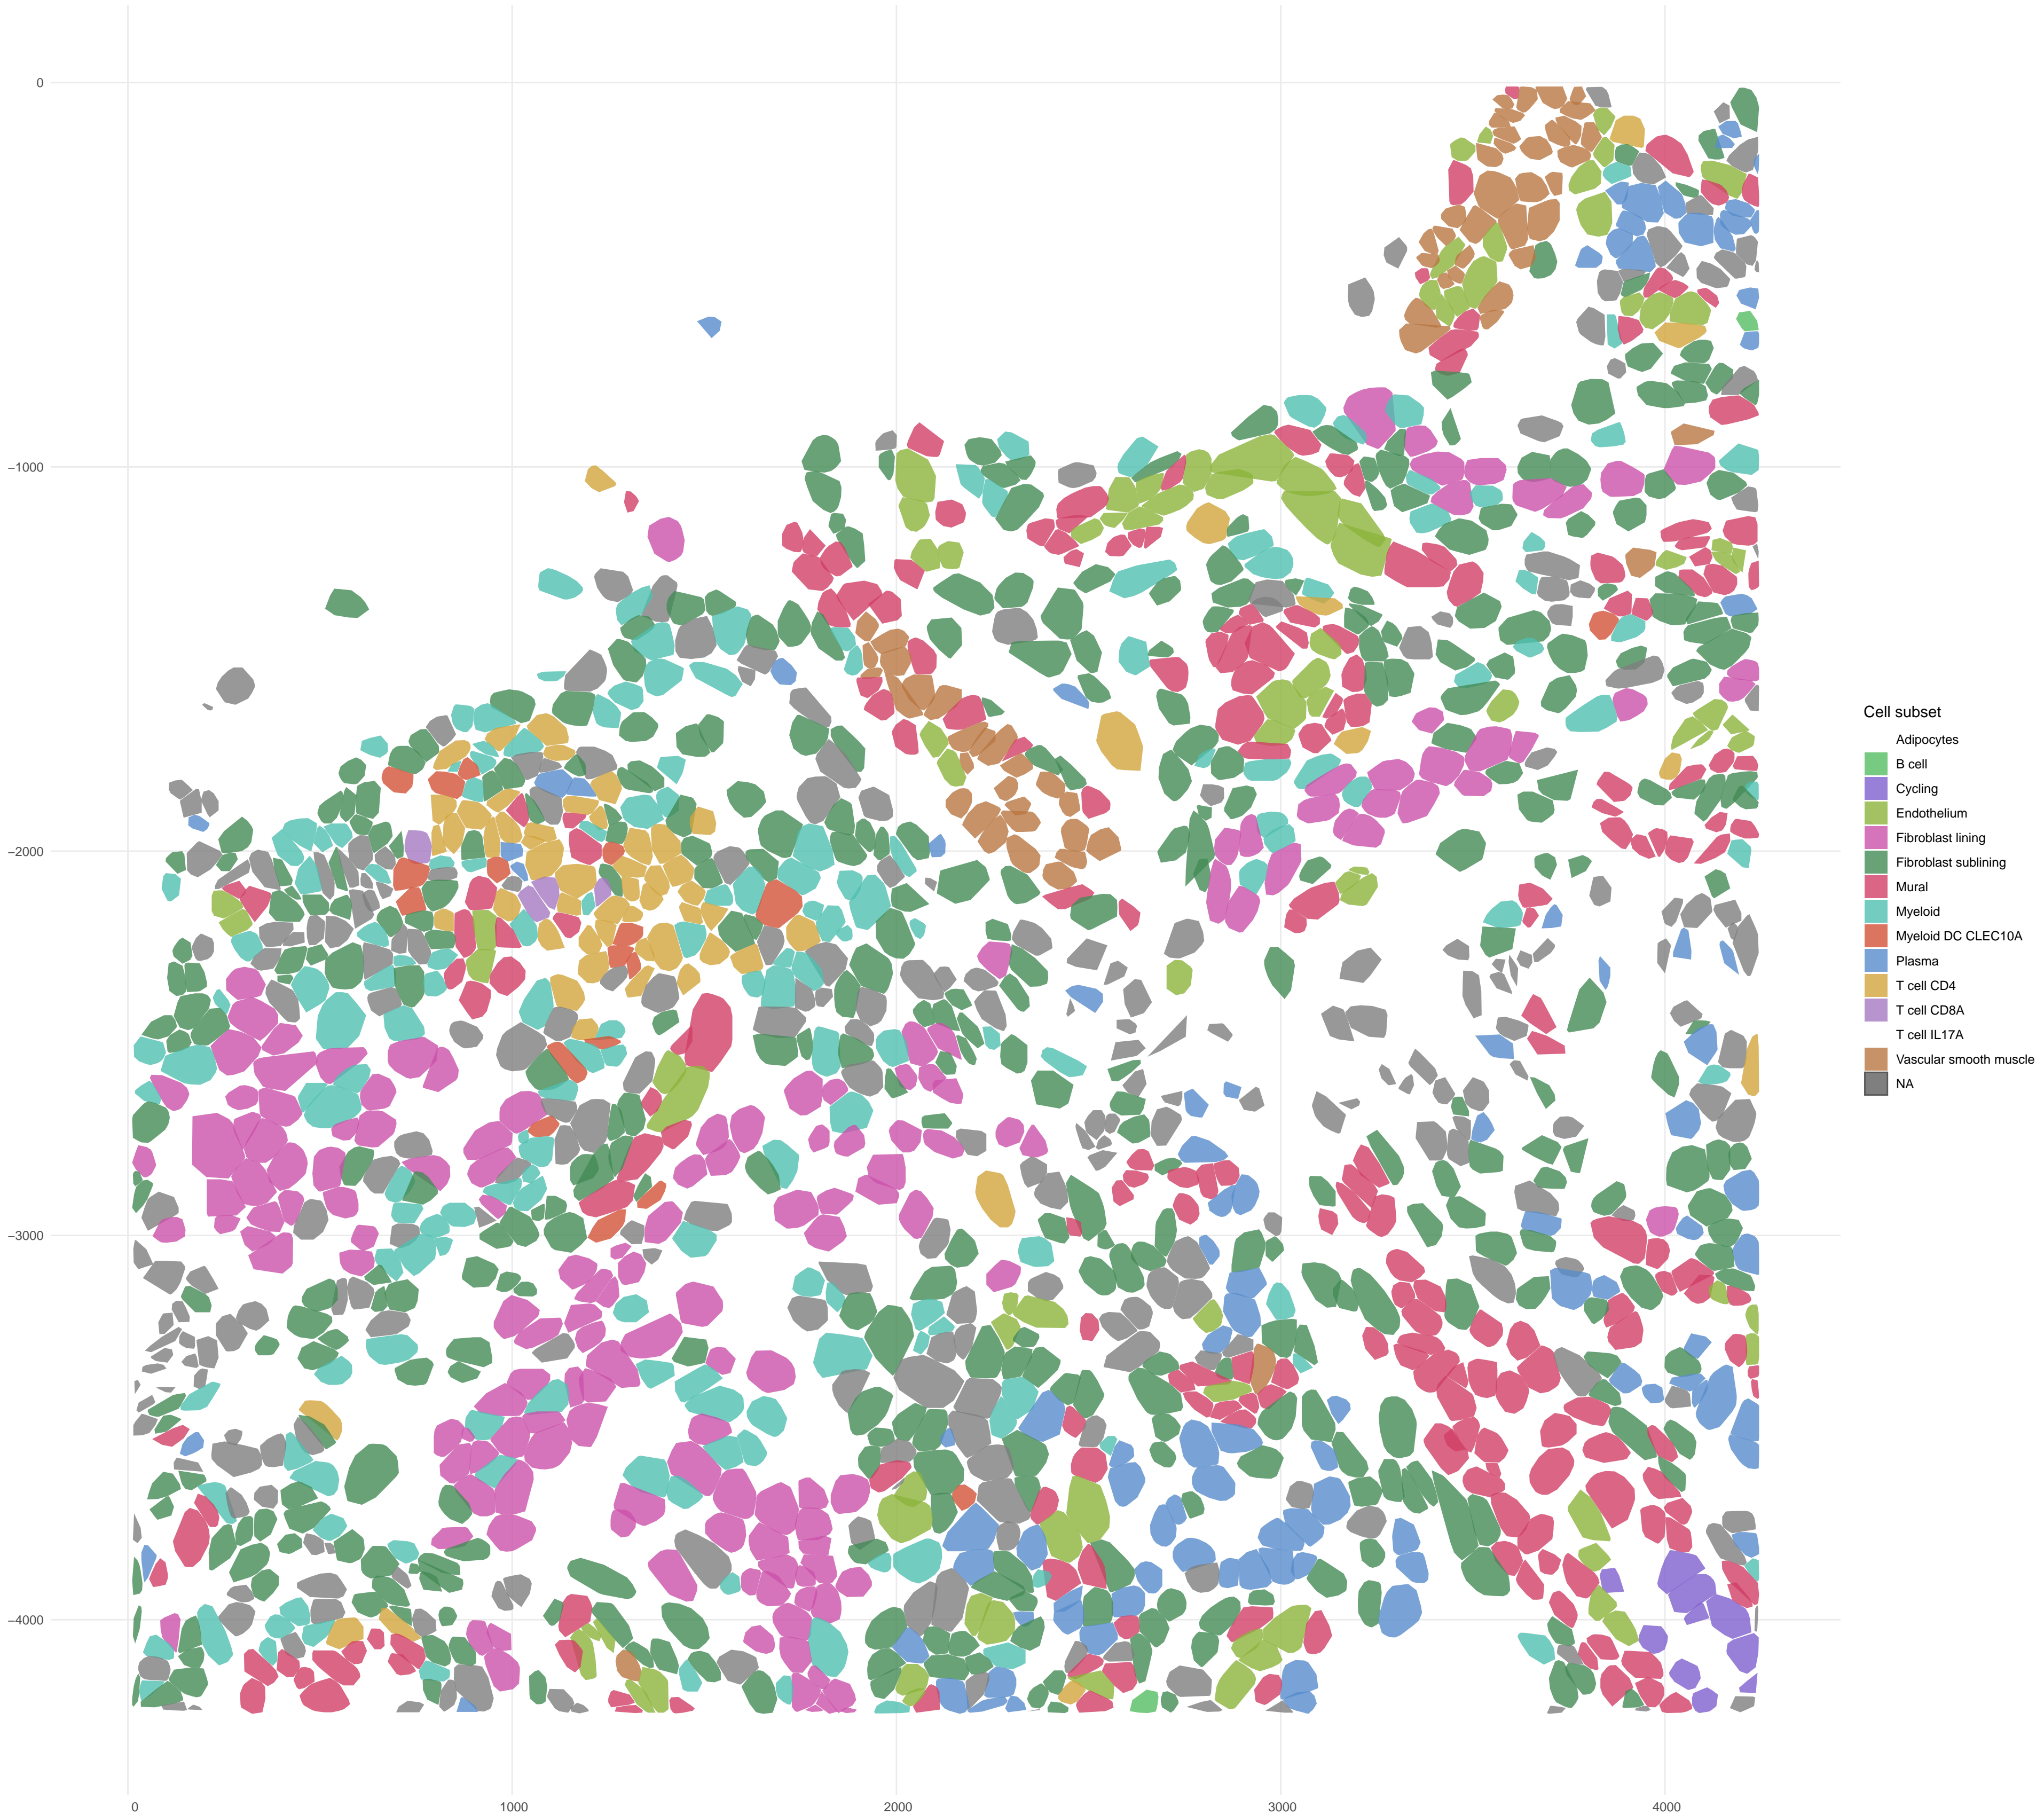



BX439 Post\_Treatment

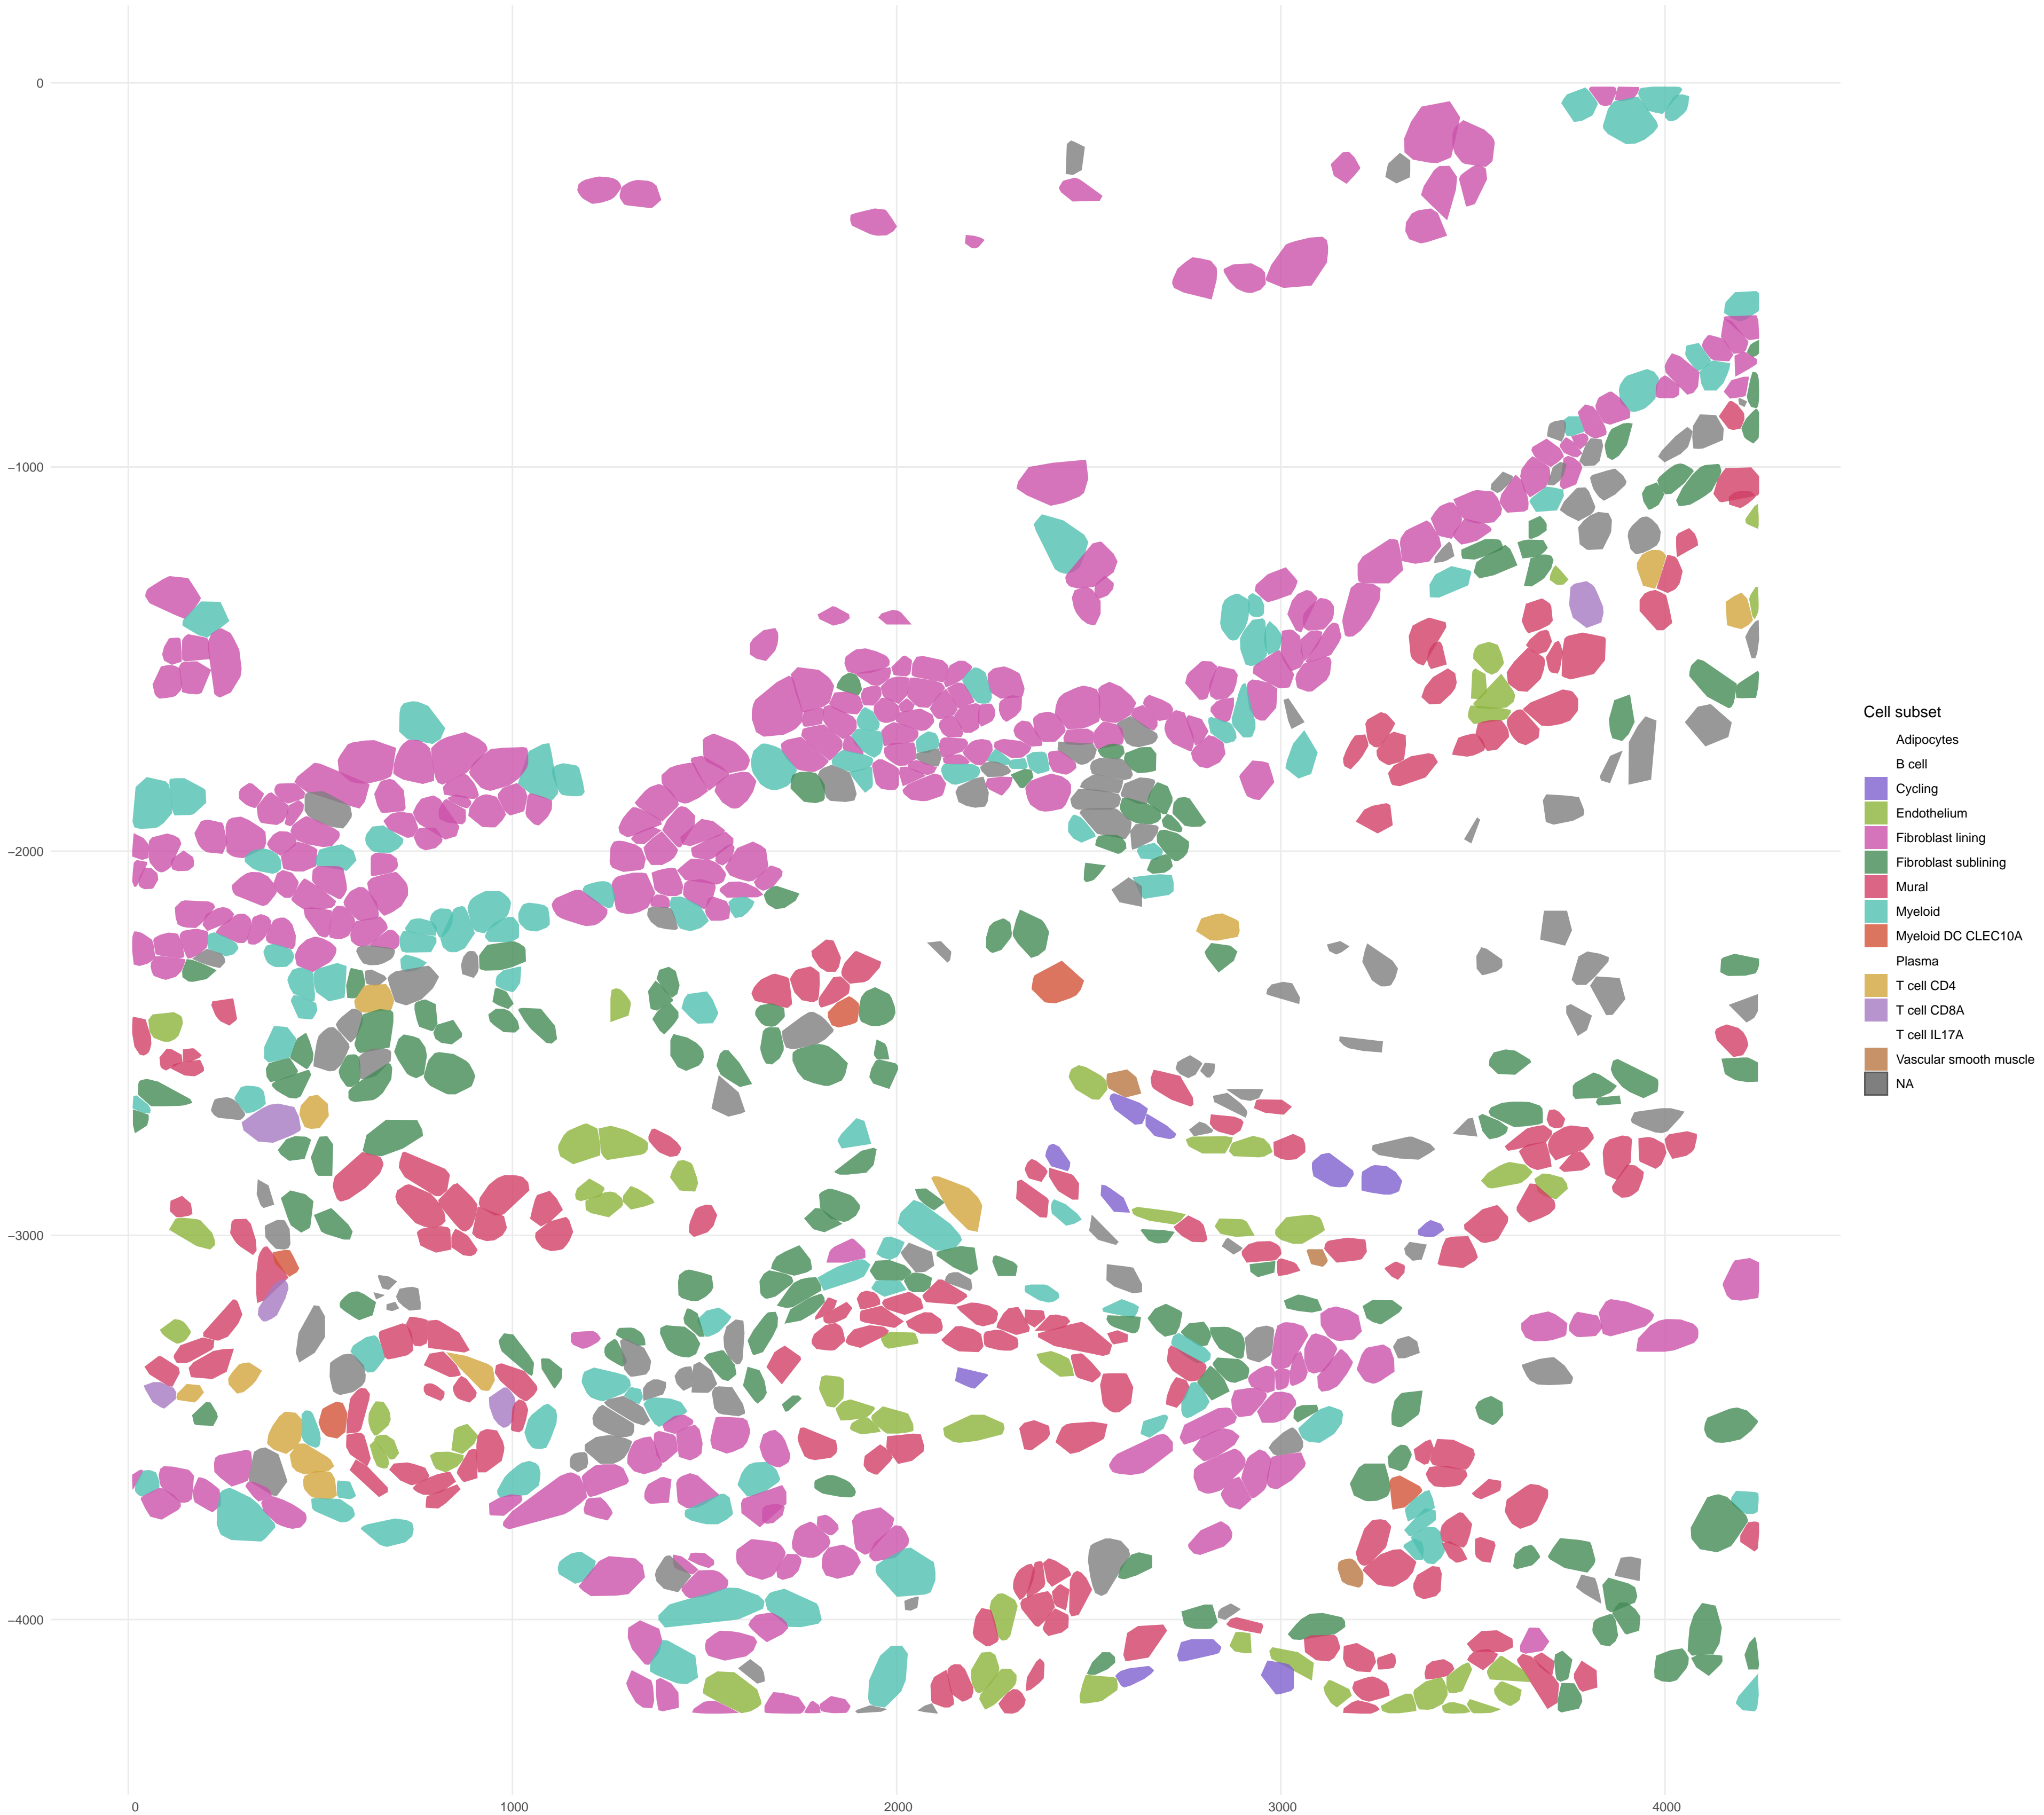

BX420 Baseline

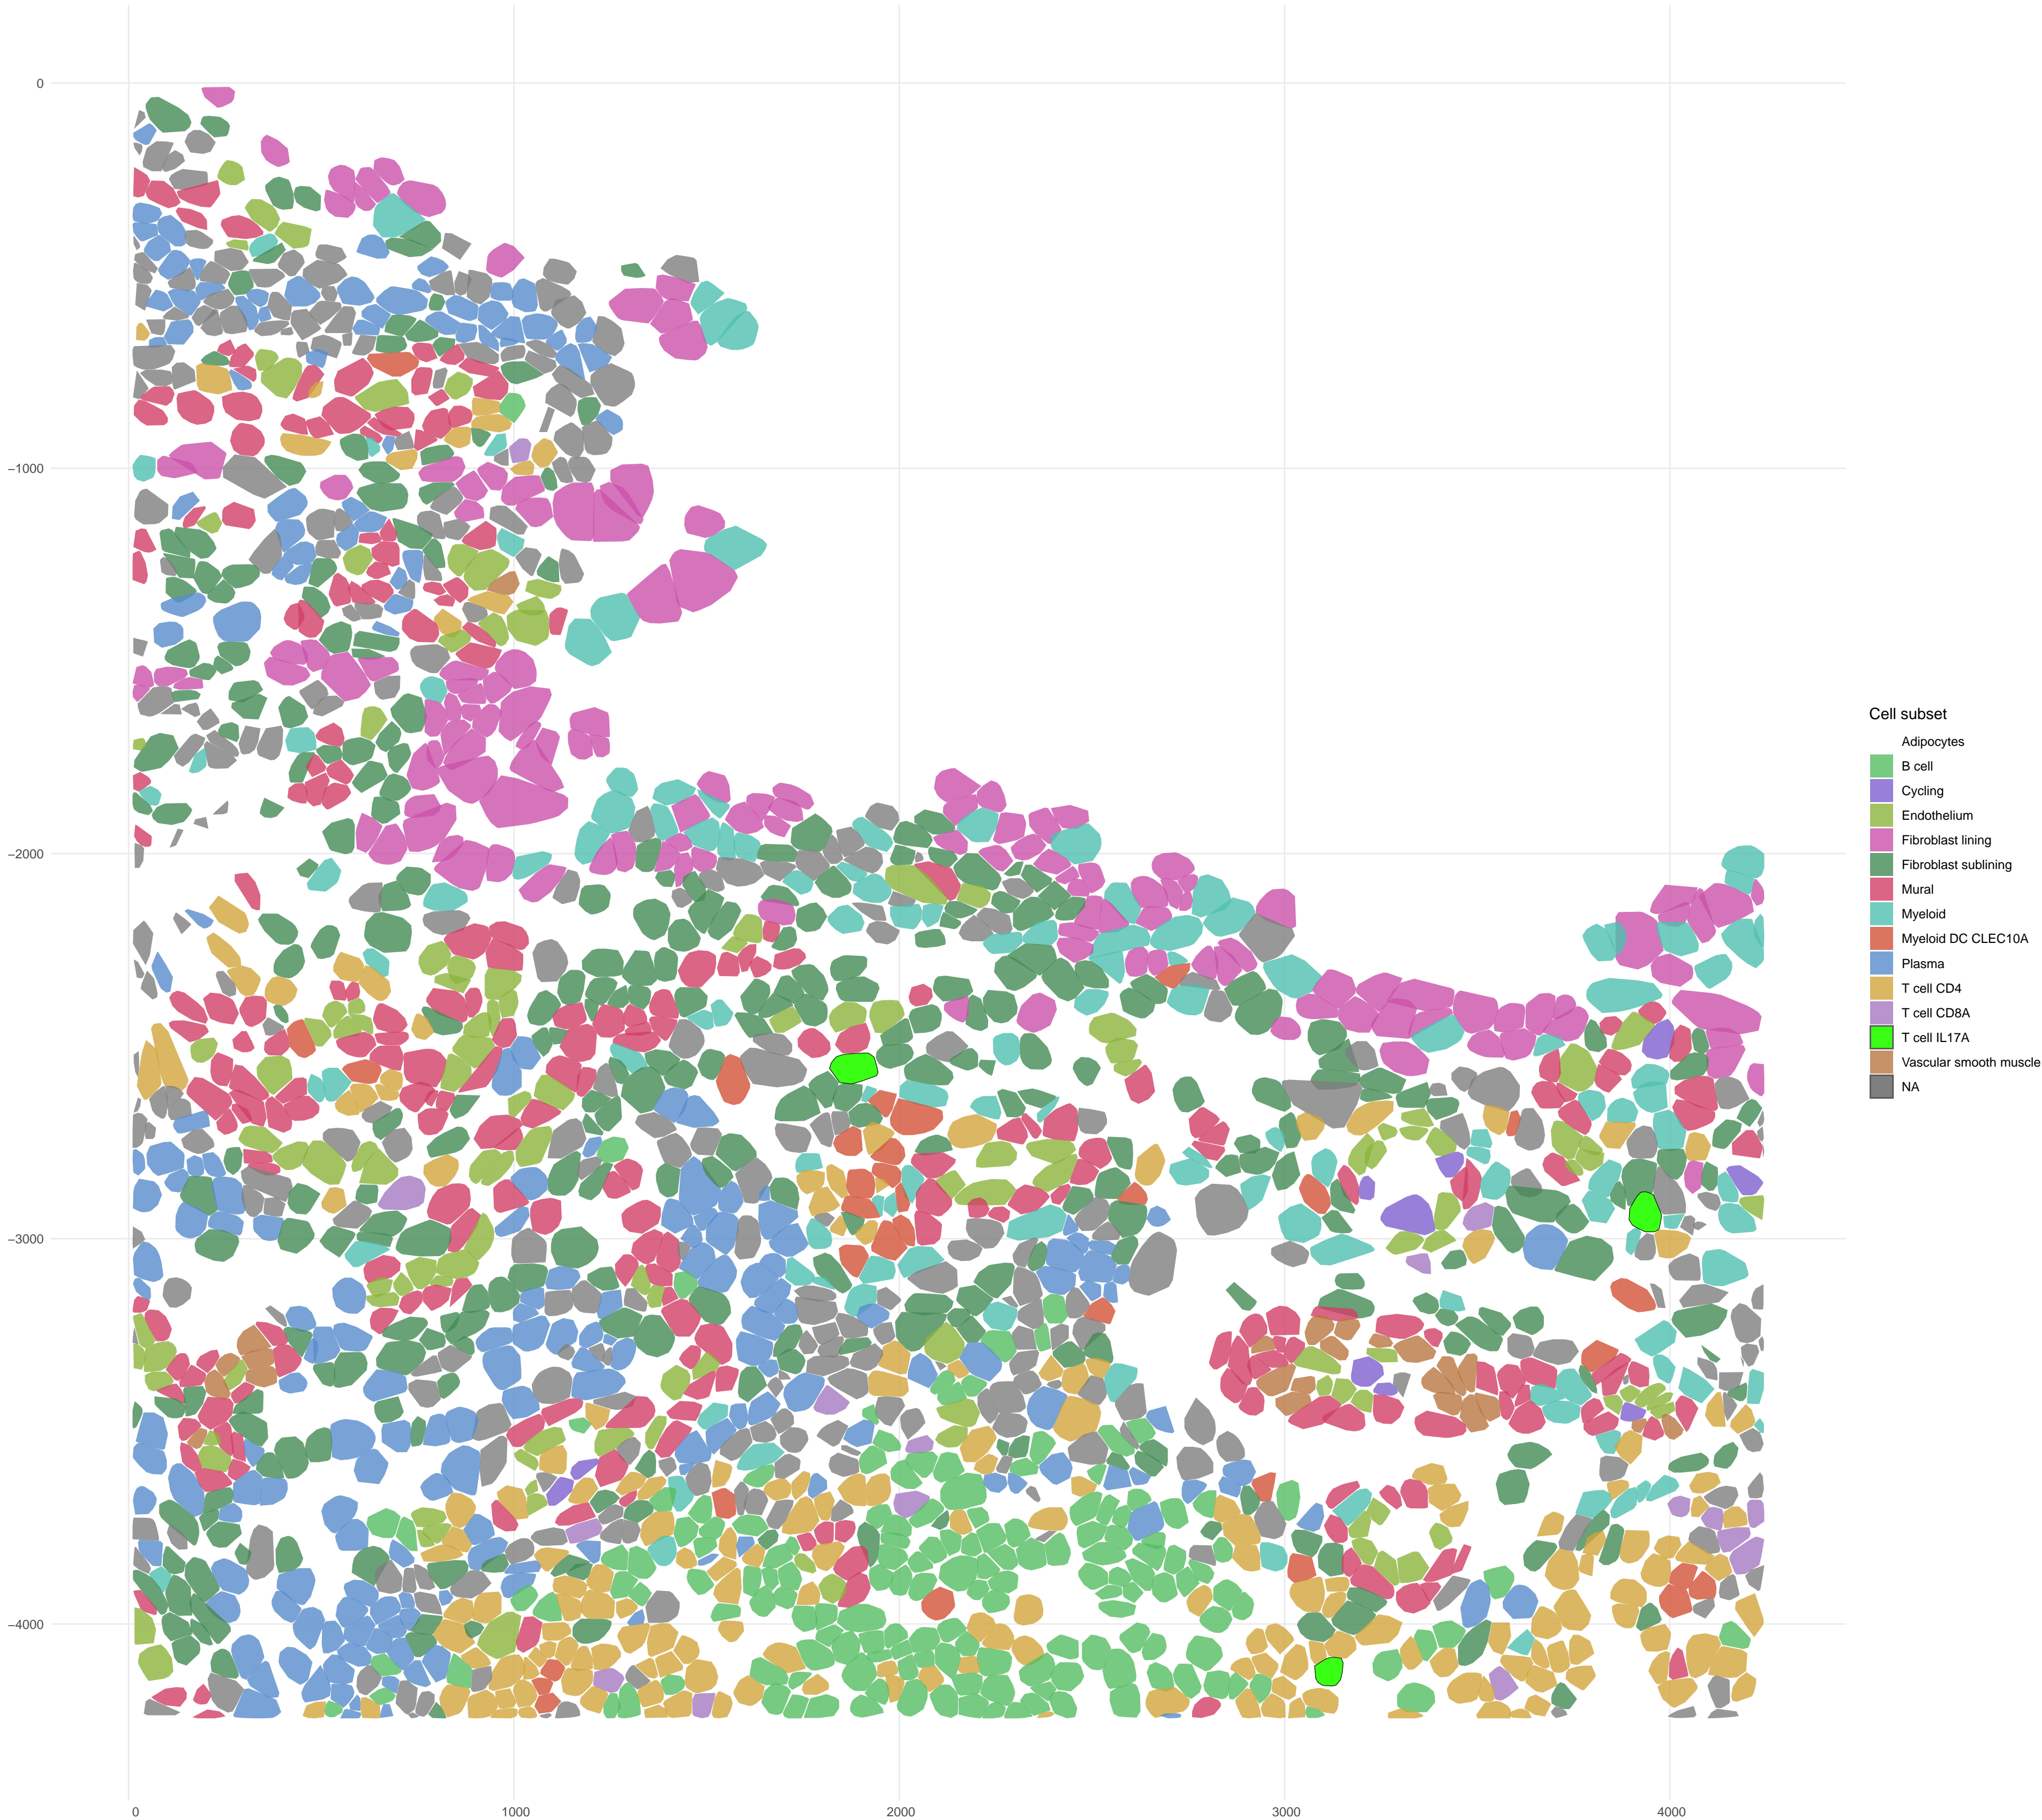

BX439 Post\_Treatment

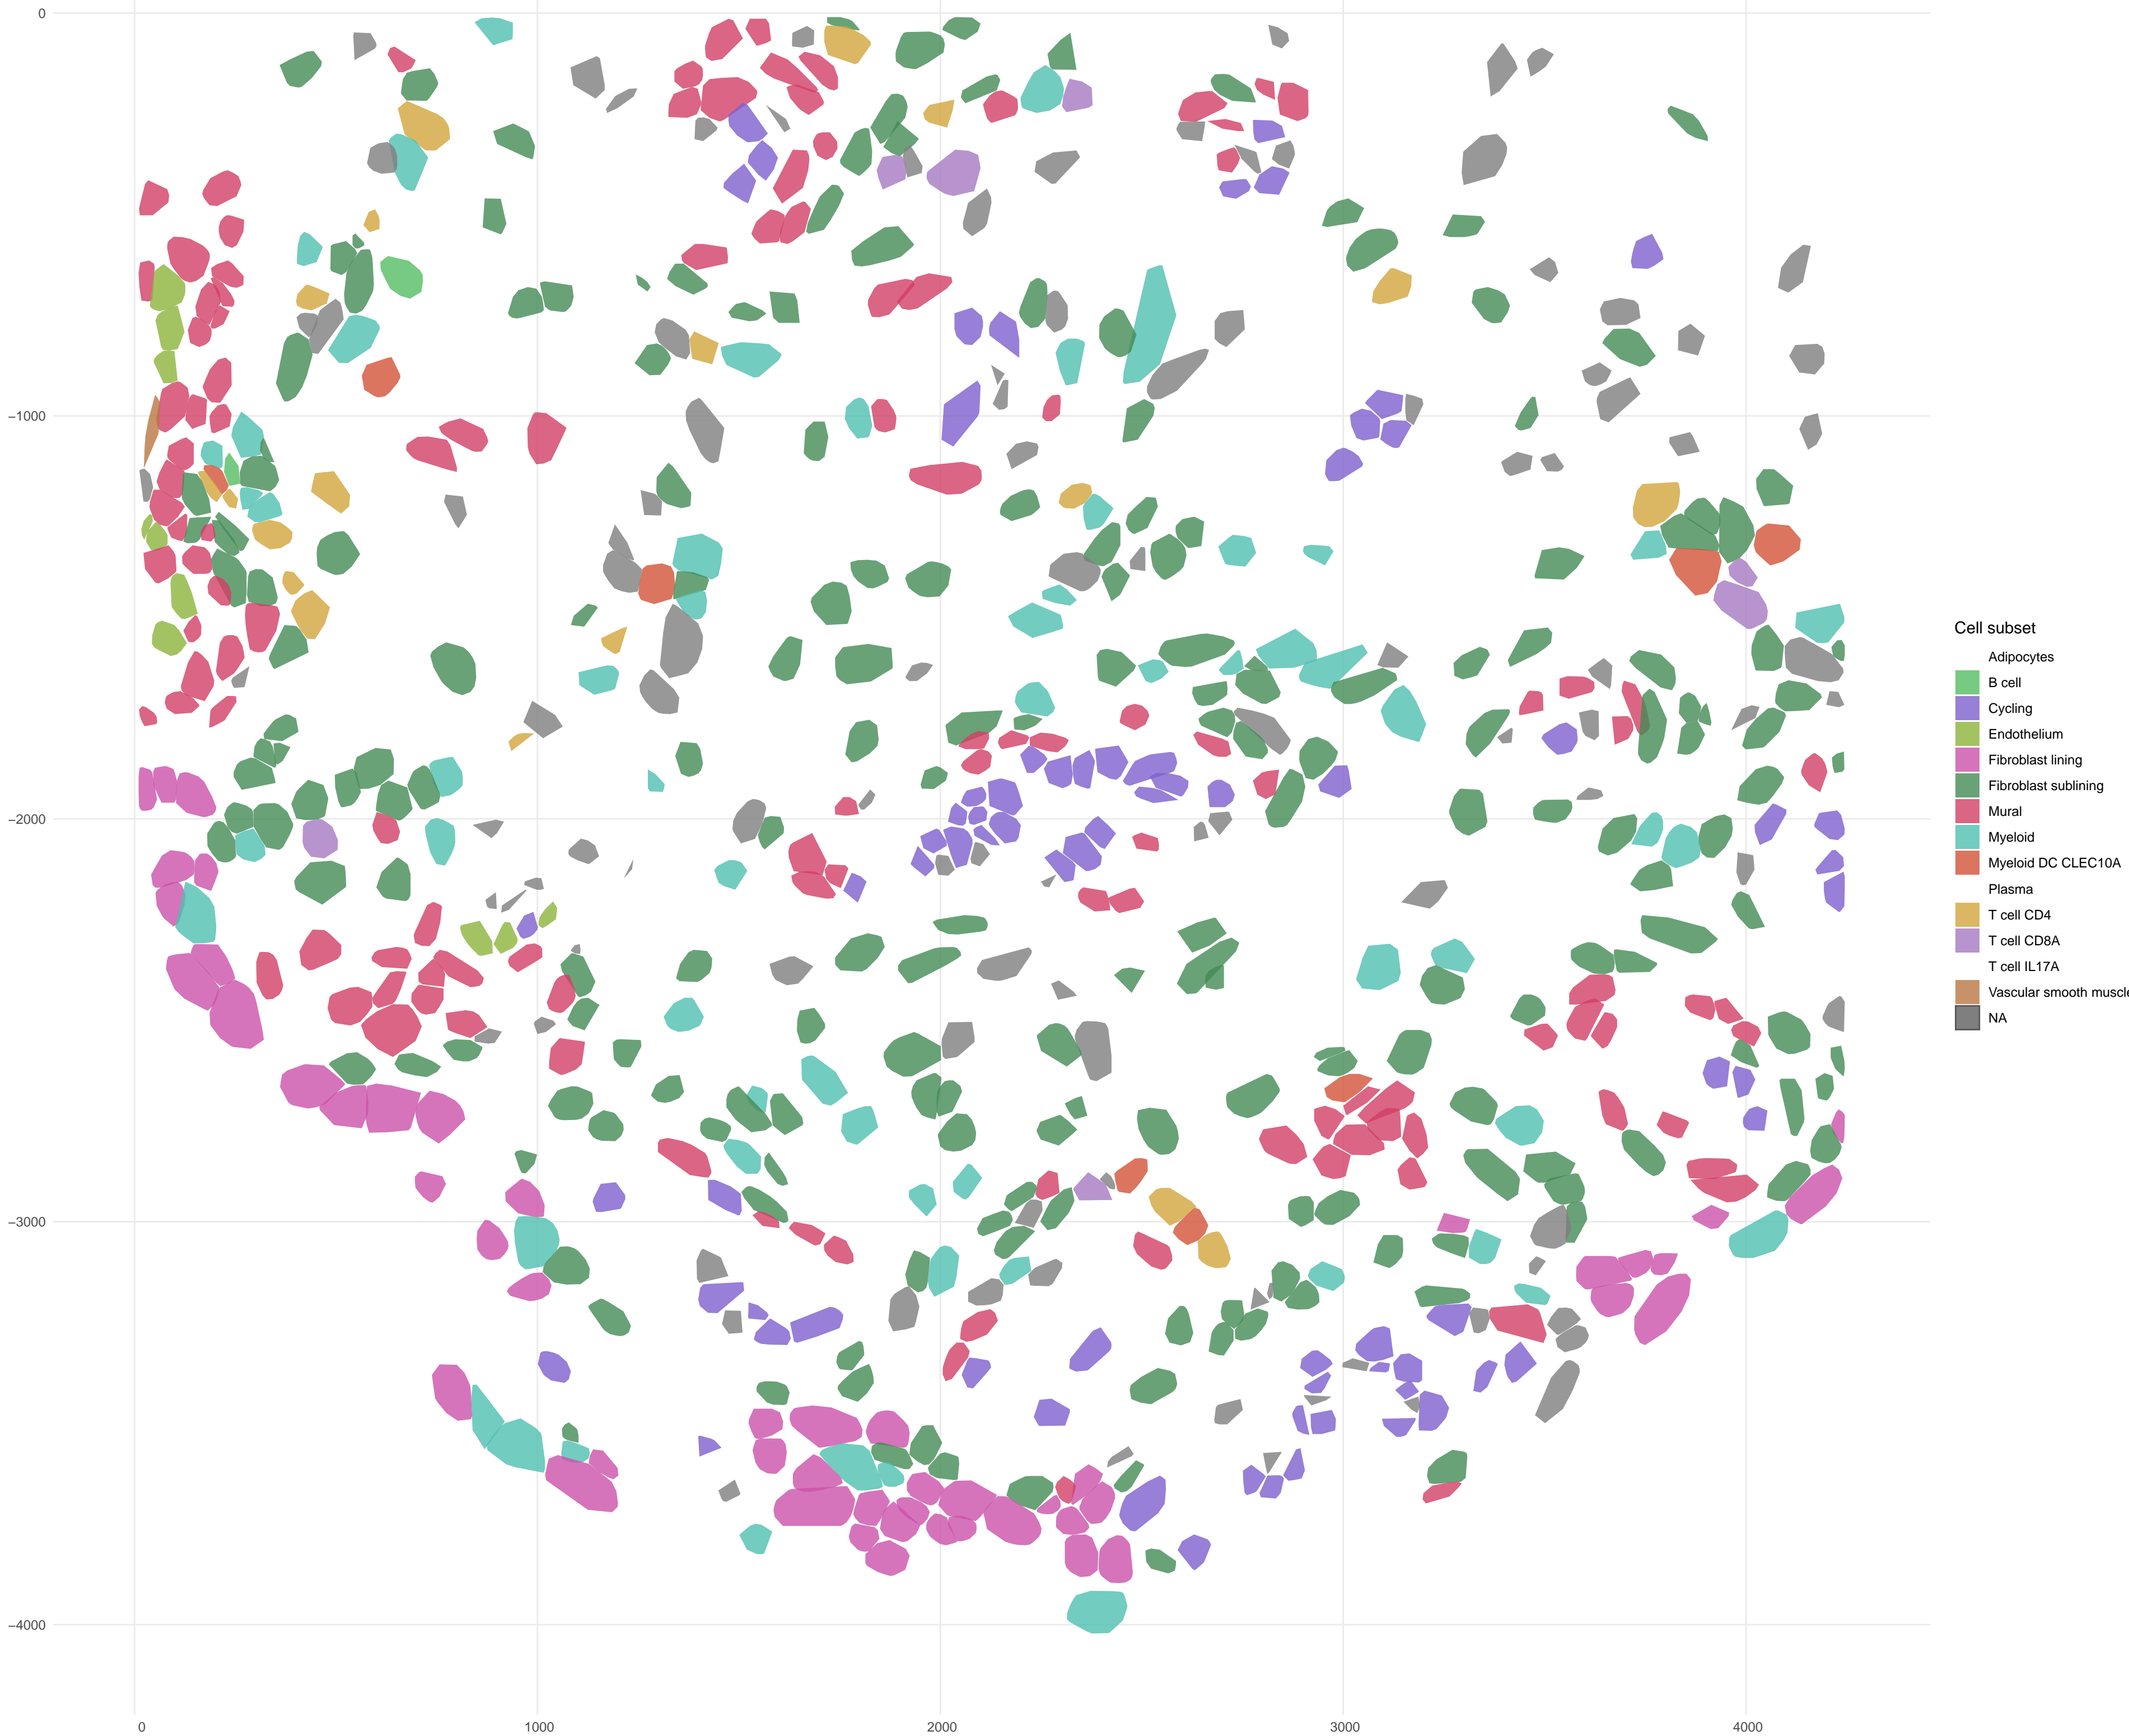



BX420 Baseline

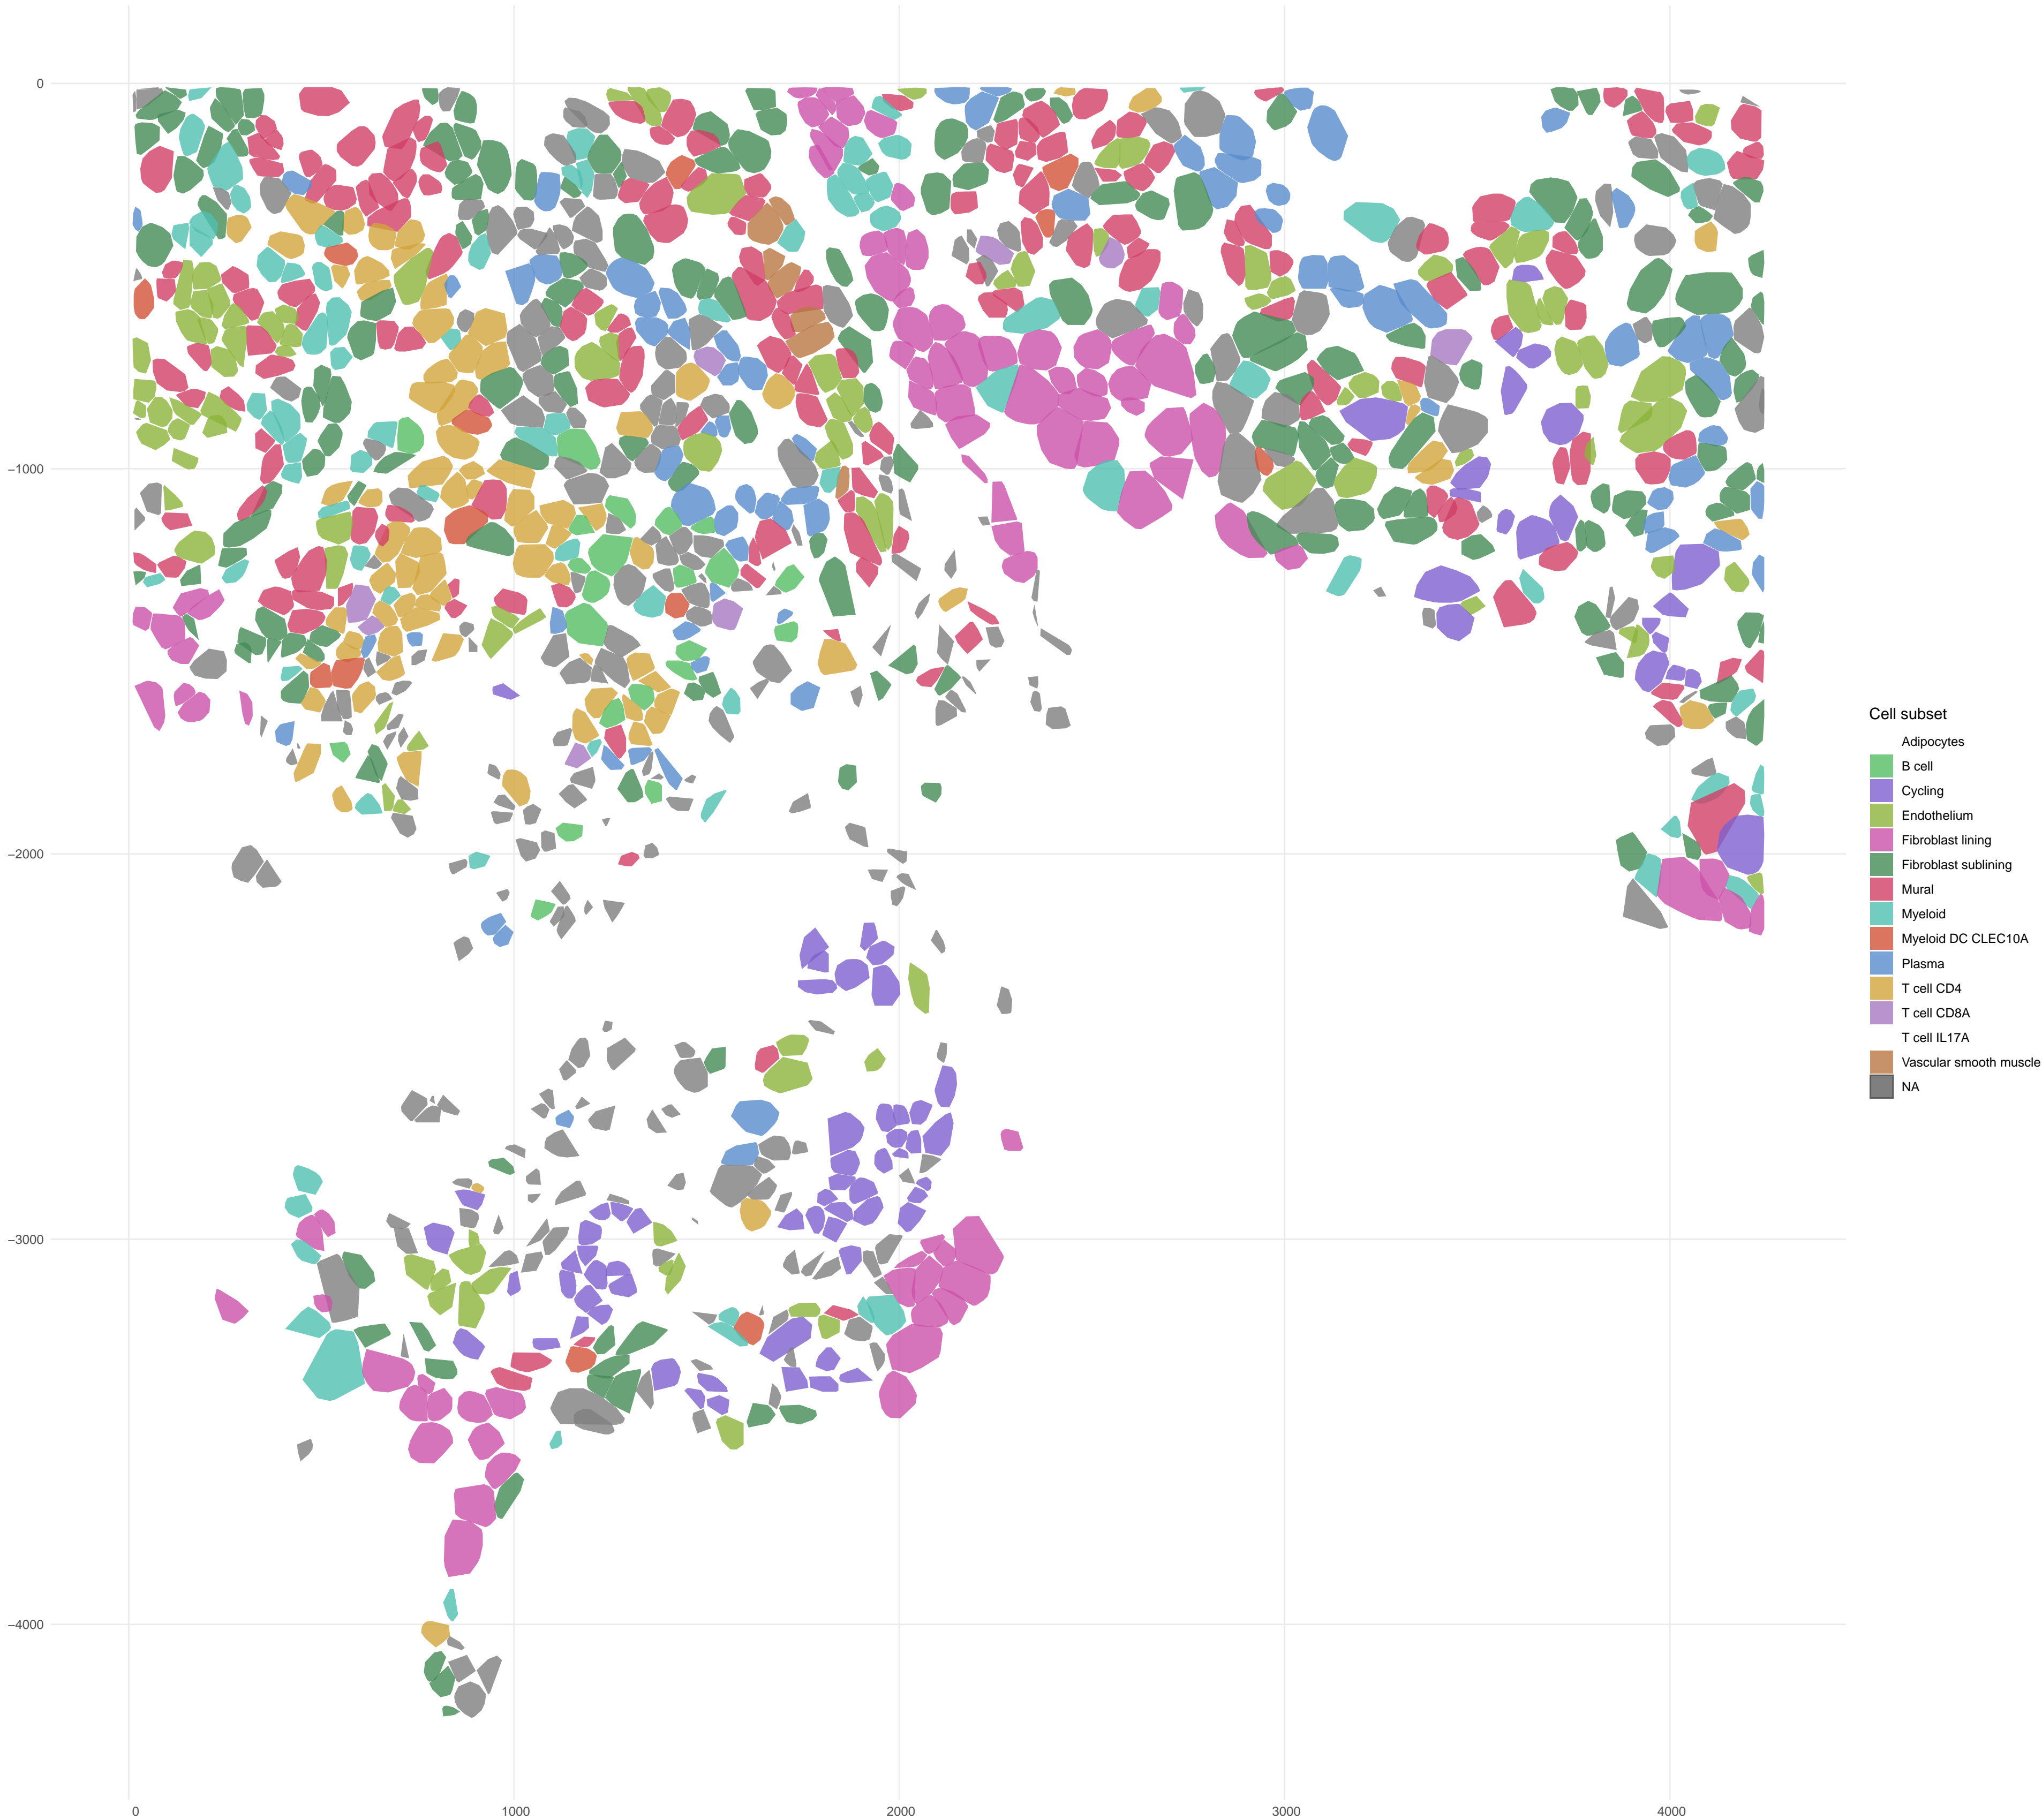

BX439 Post\_Treatment

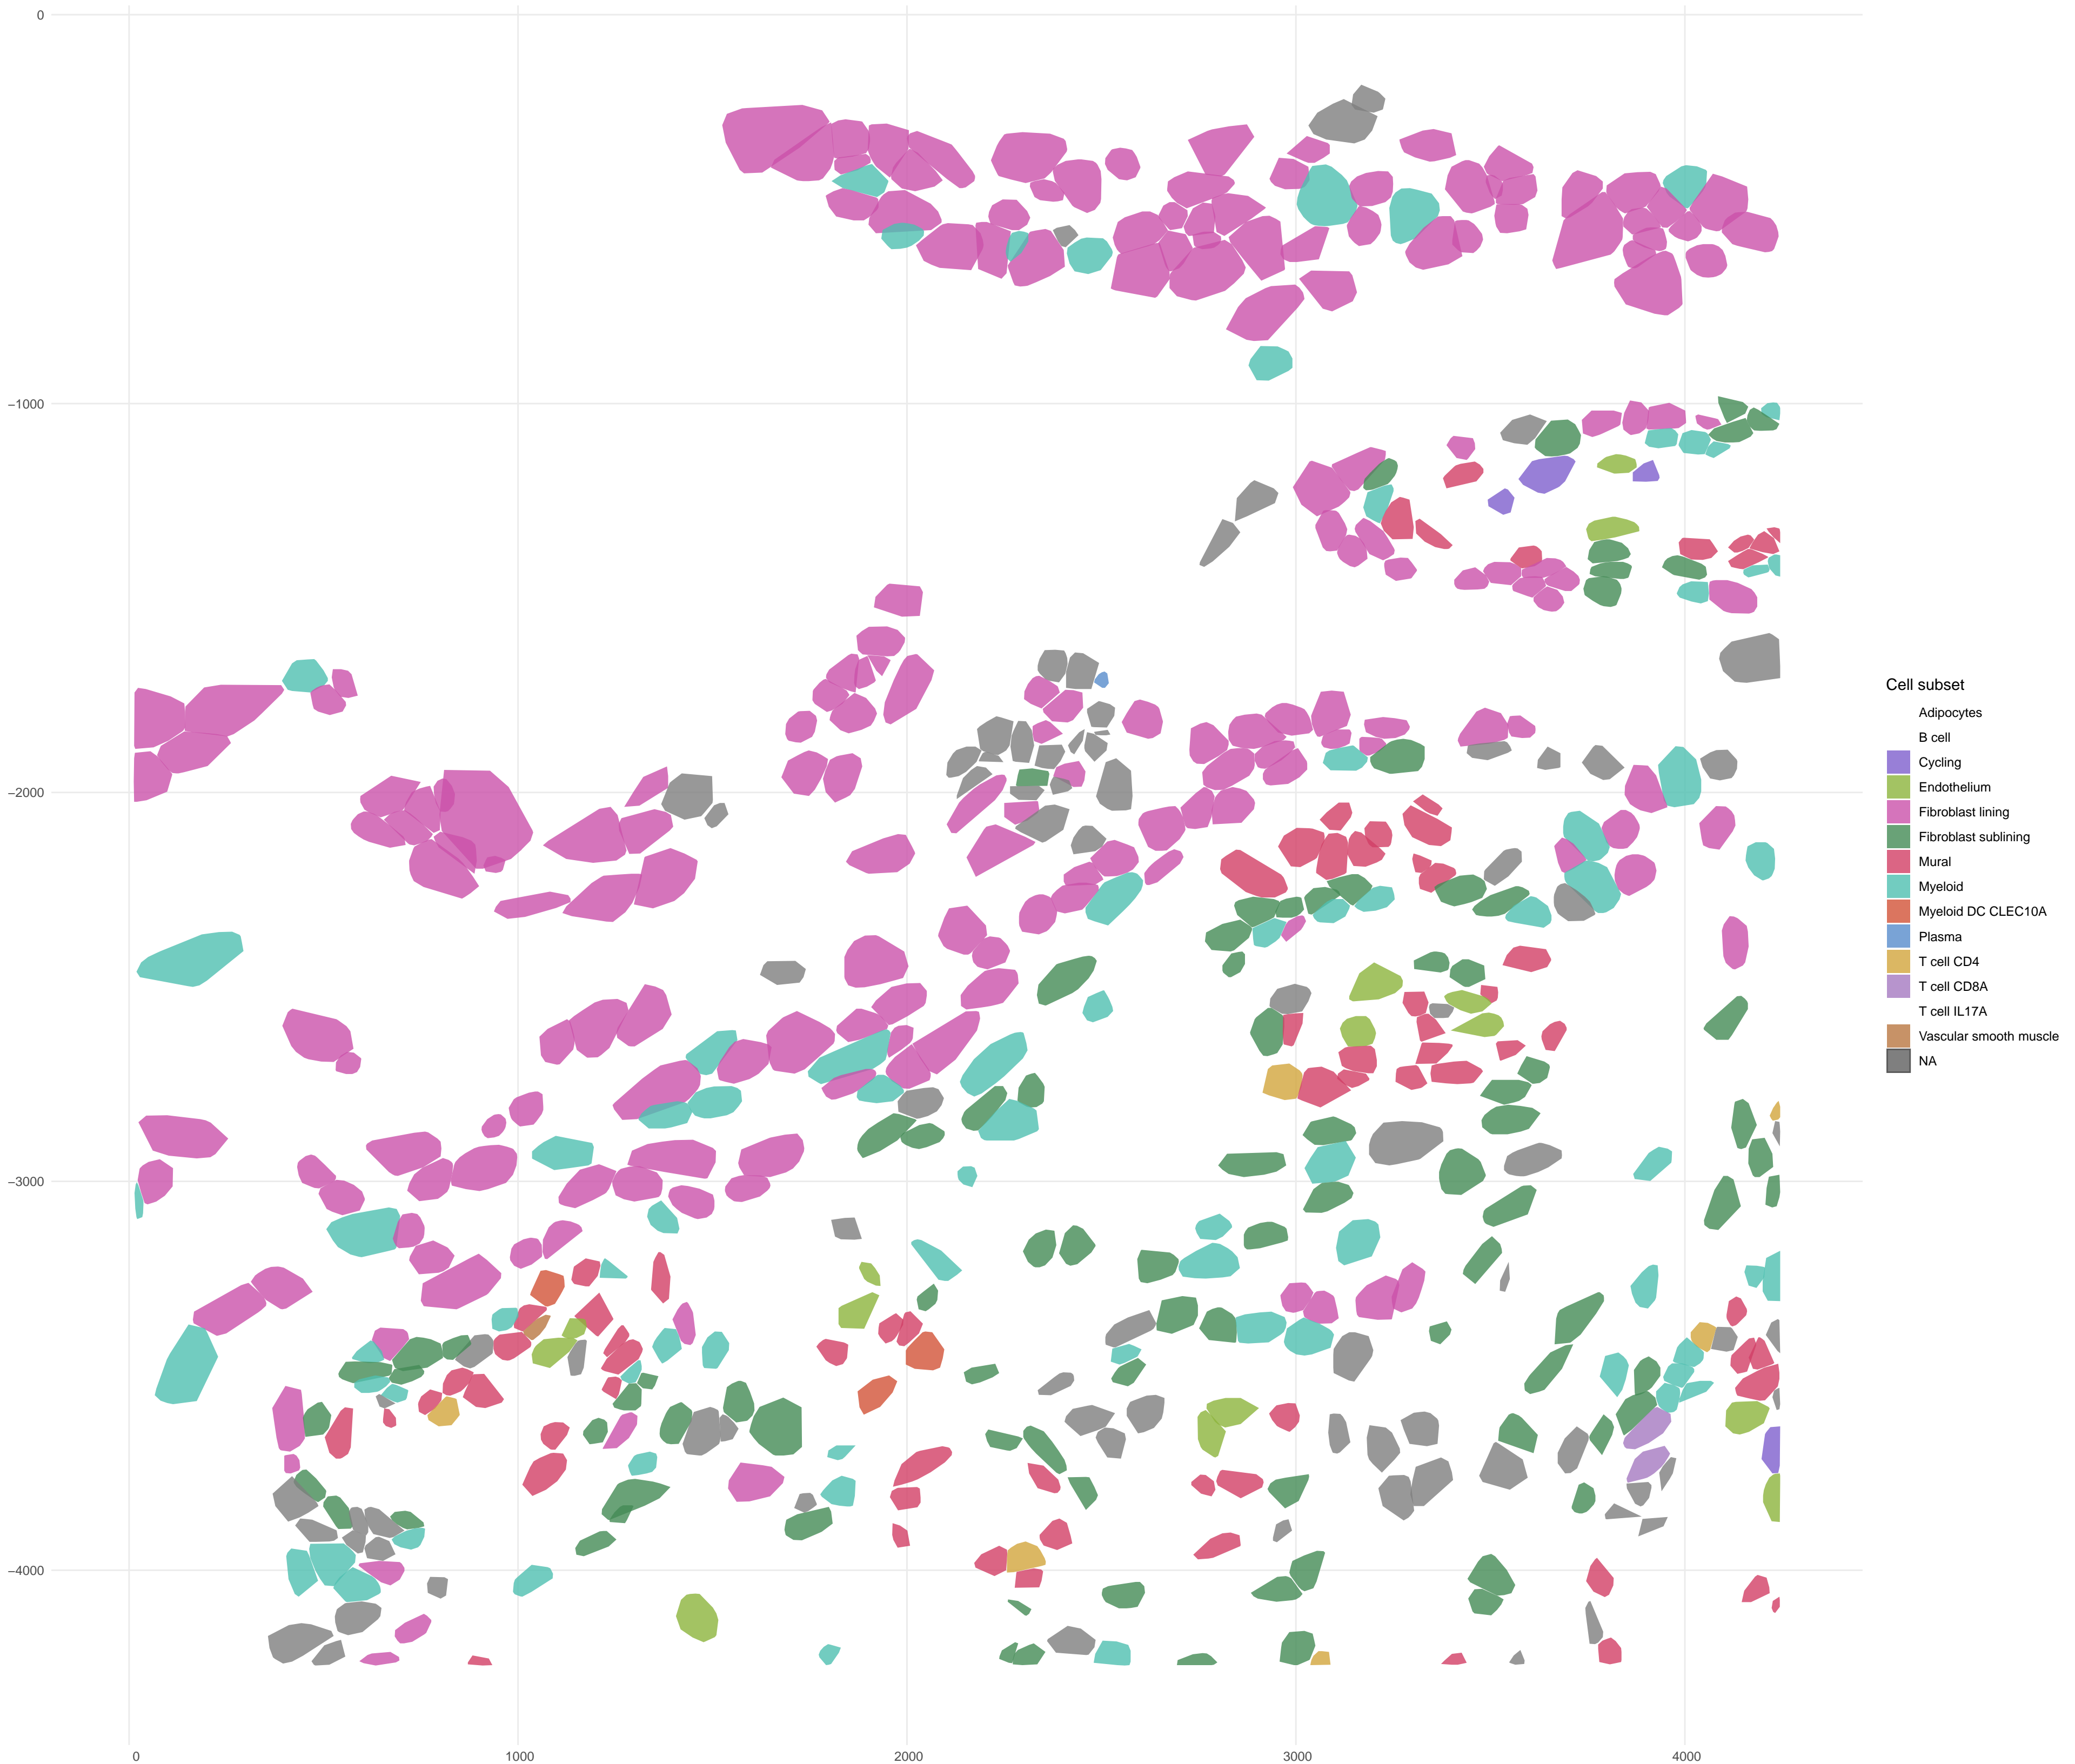

BX420 Baseline

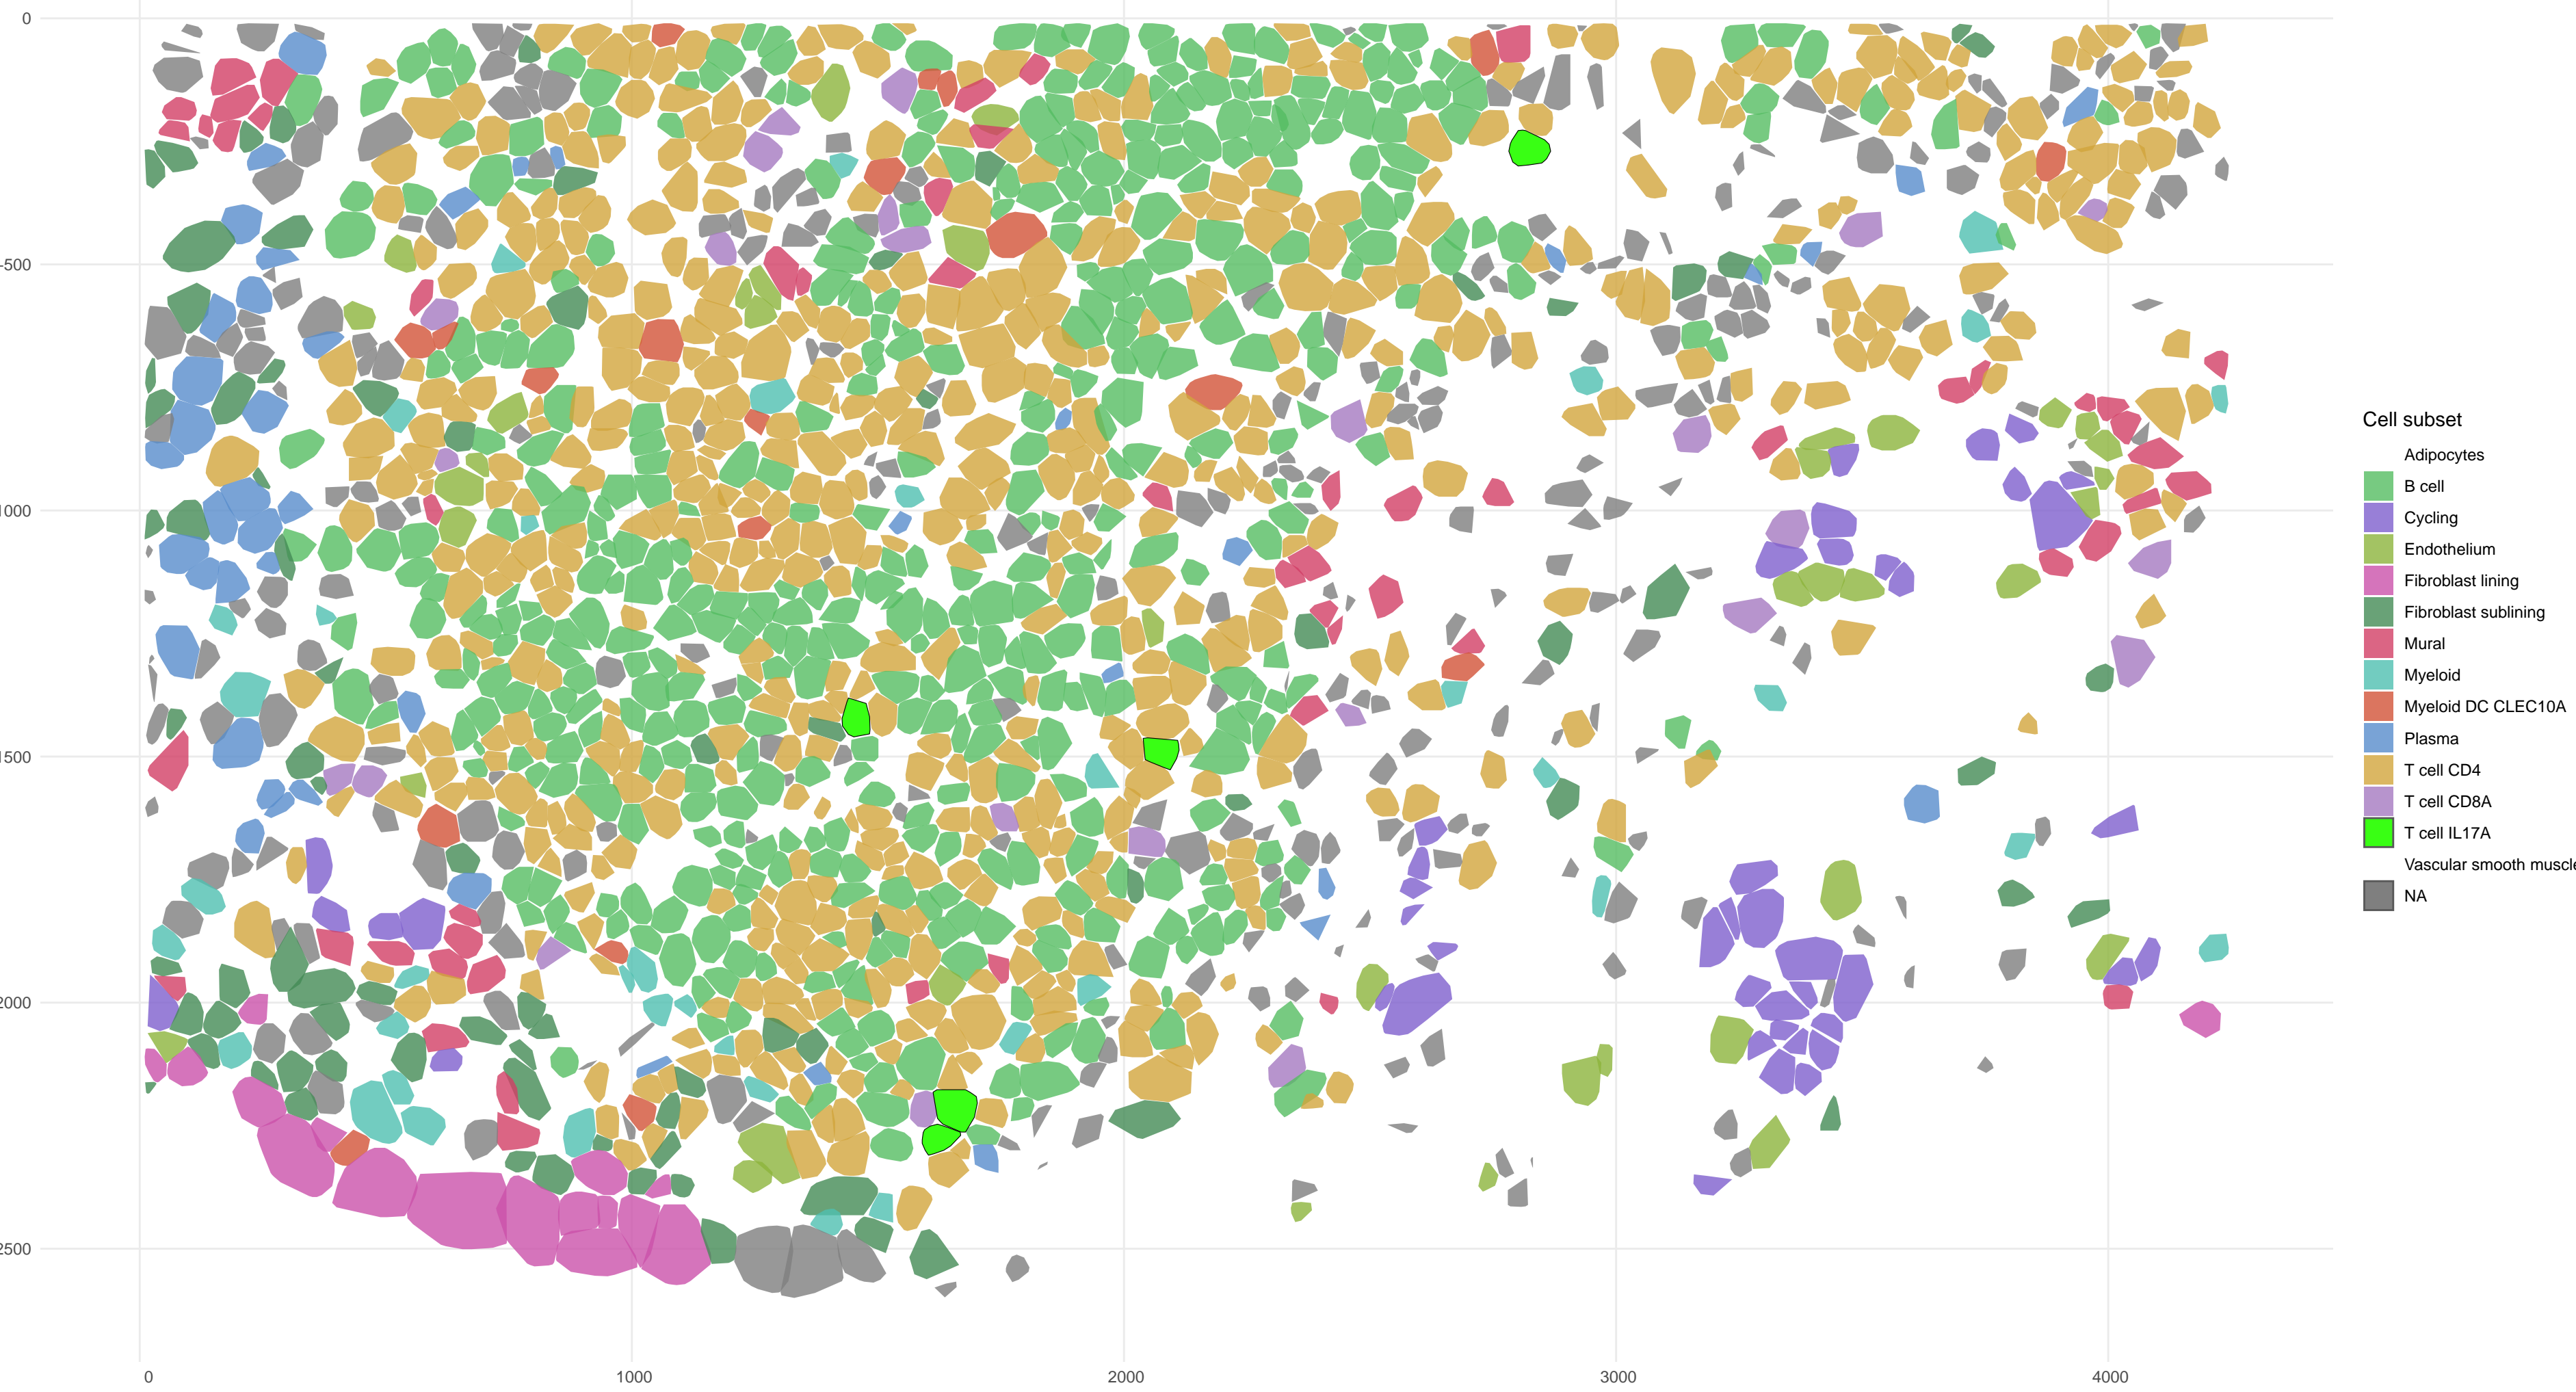



BX439 Post\_Treatment

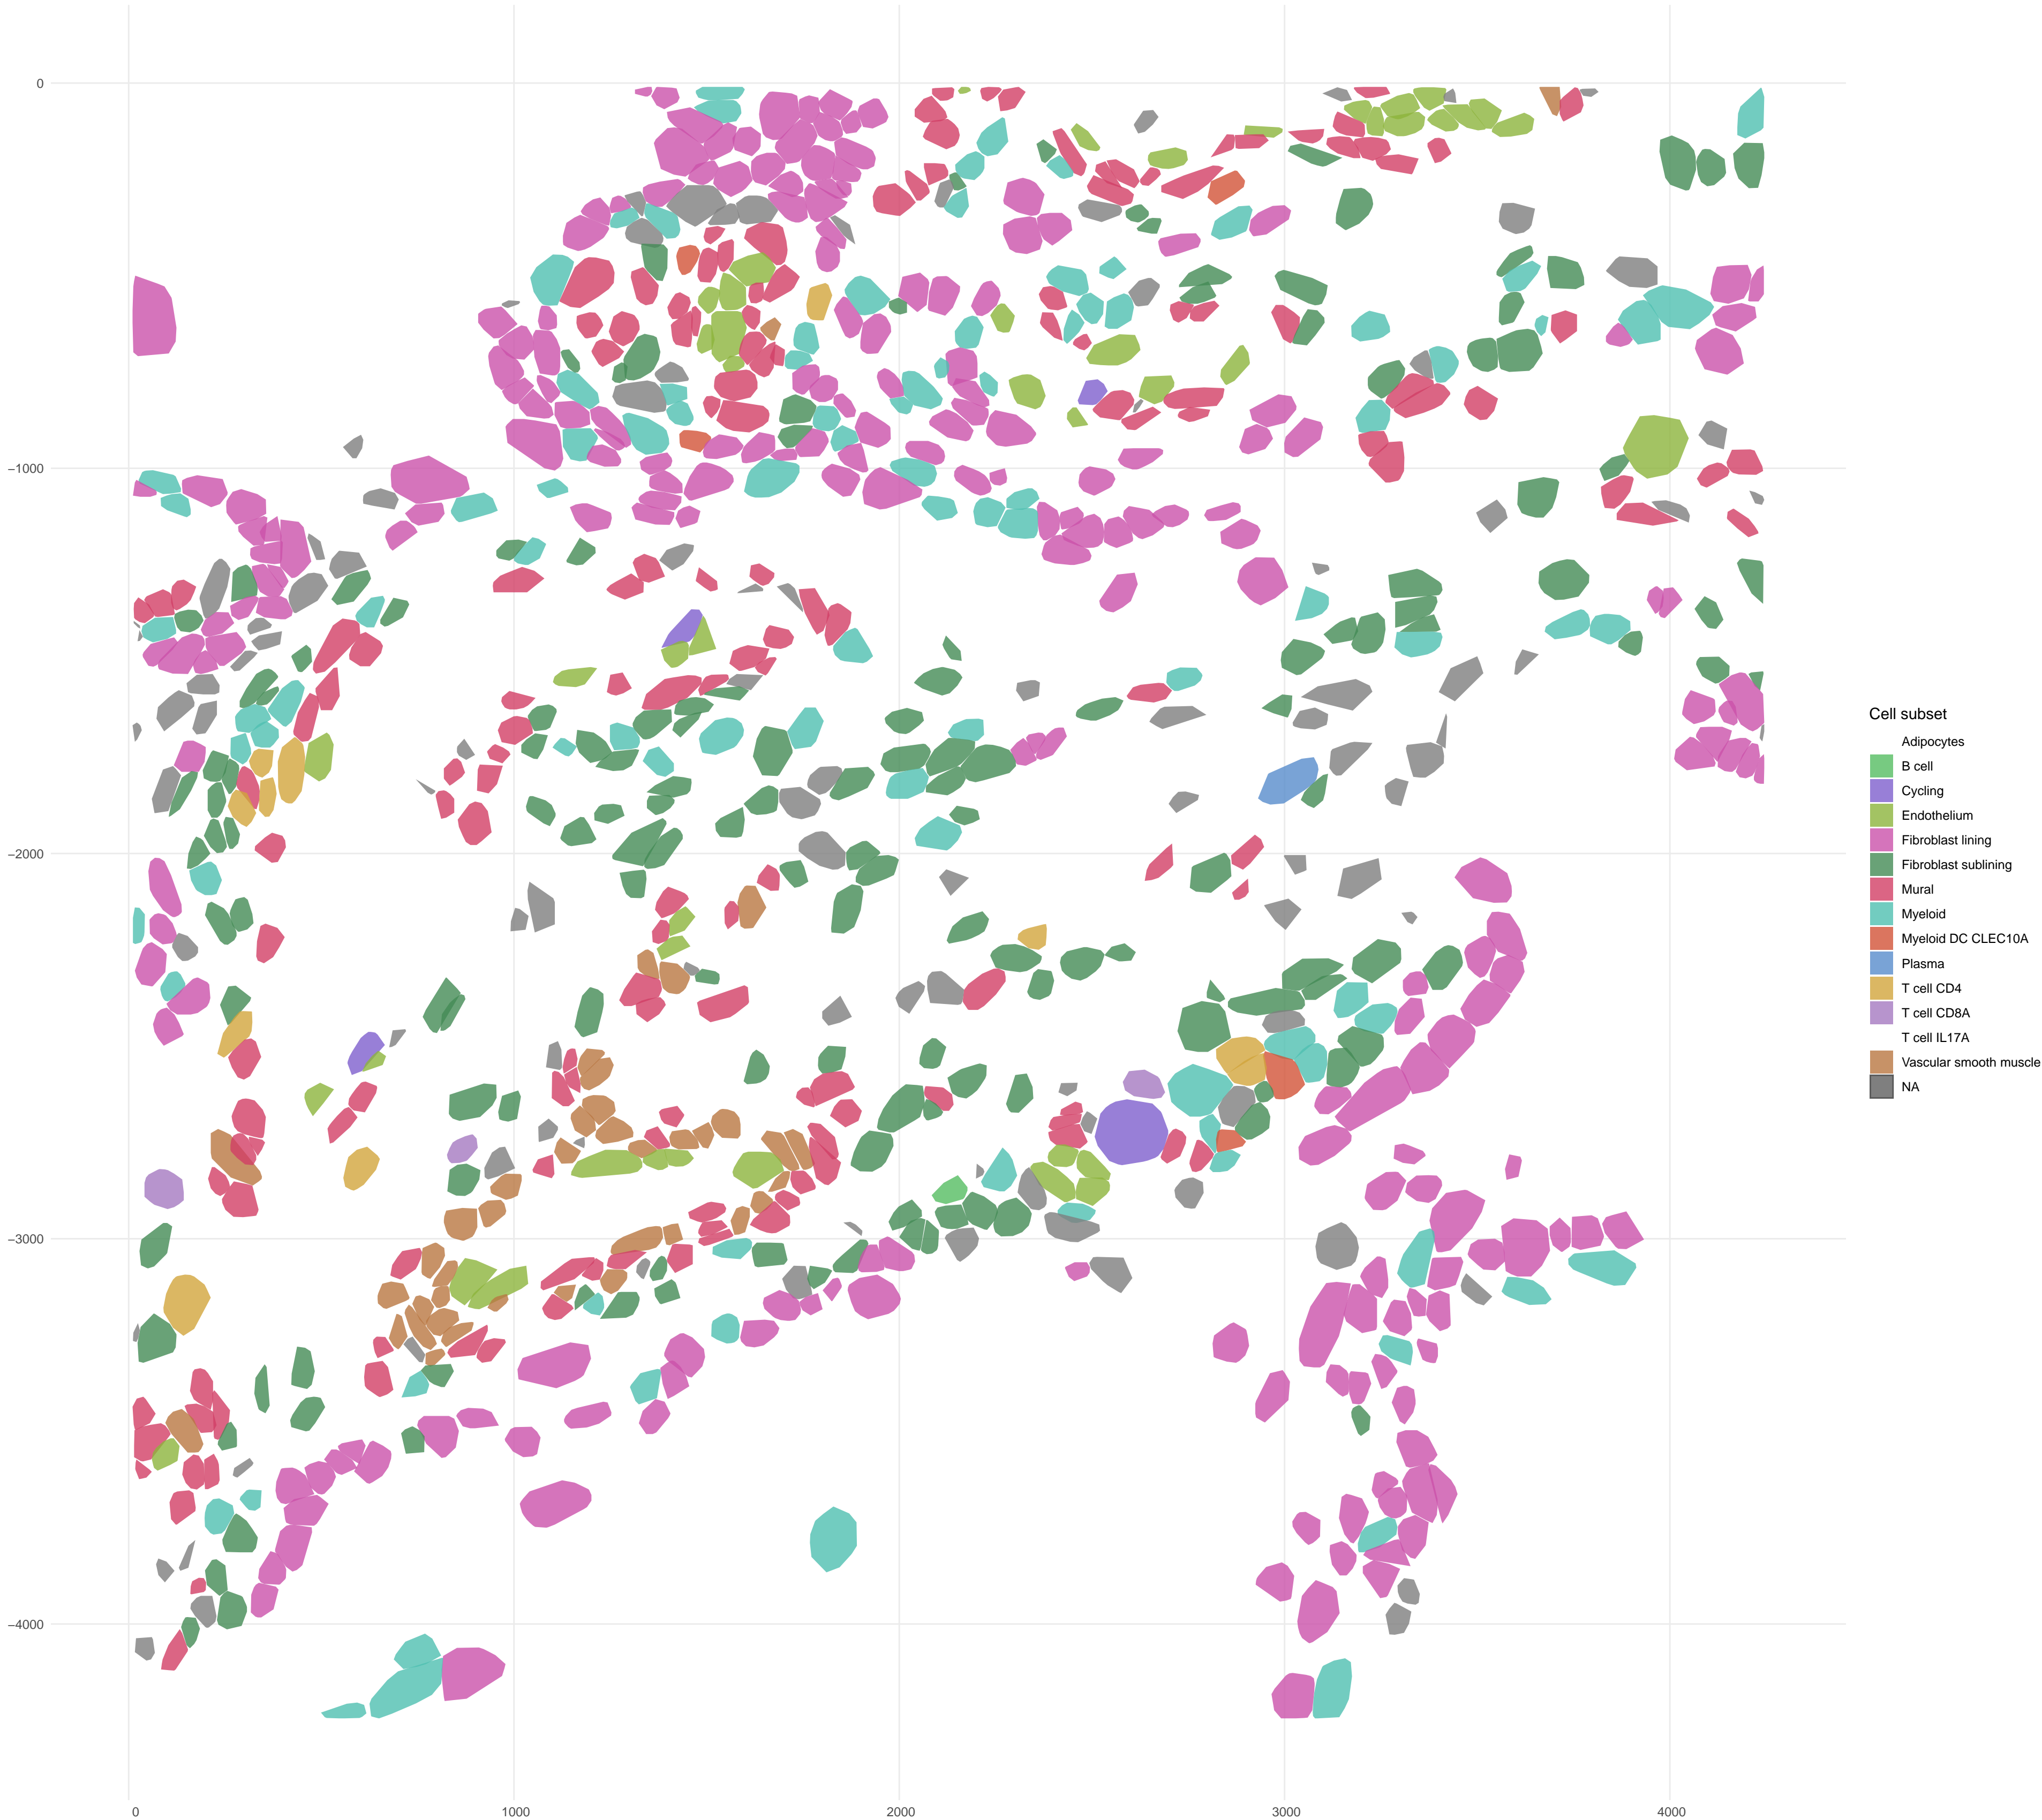

BX420 Baseline

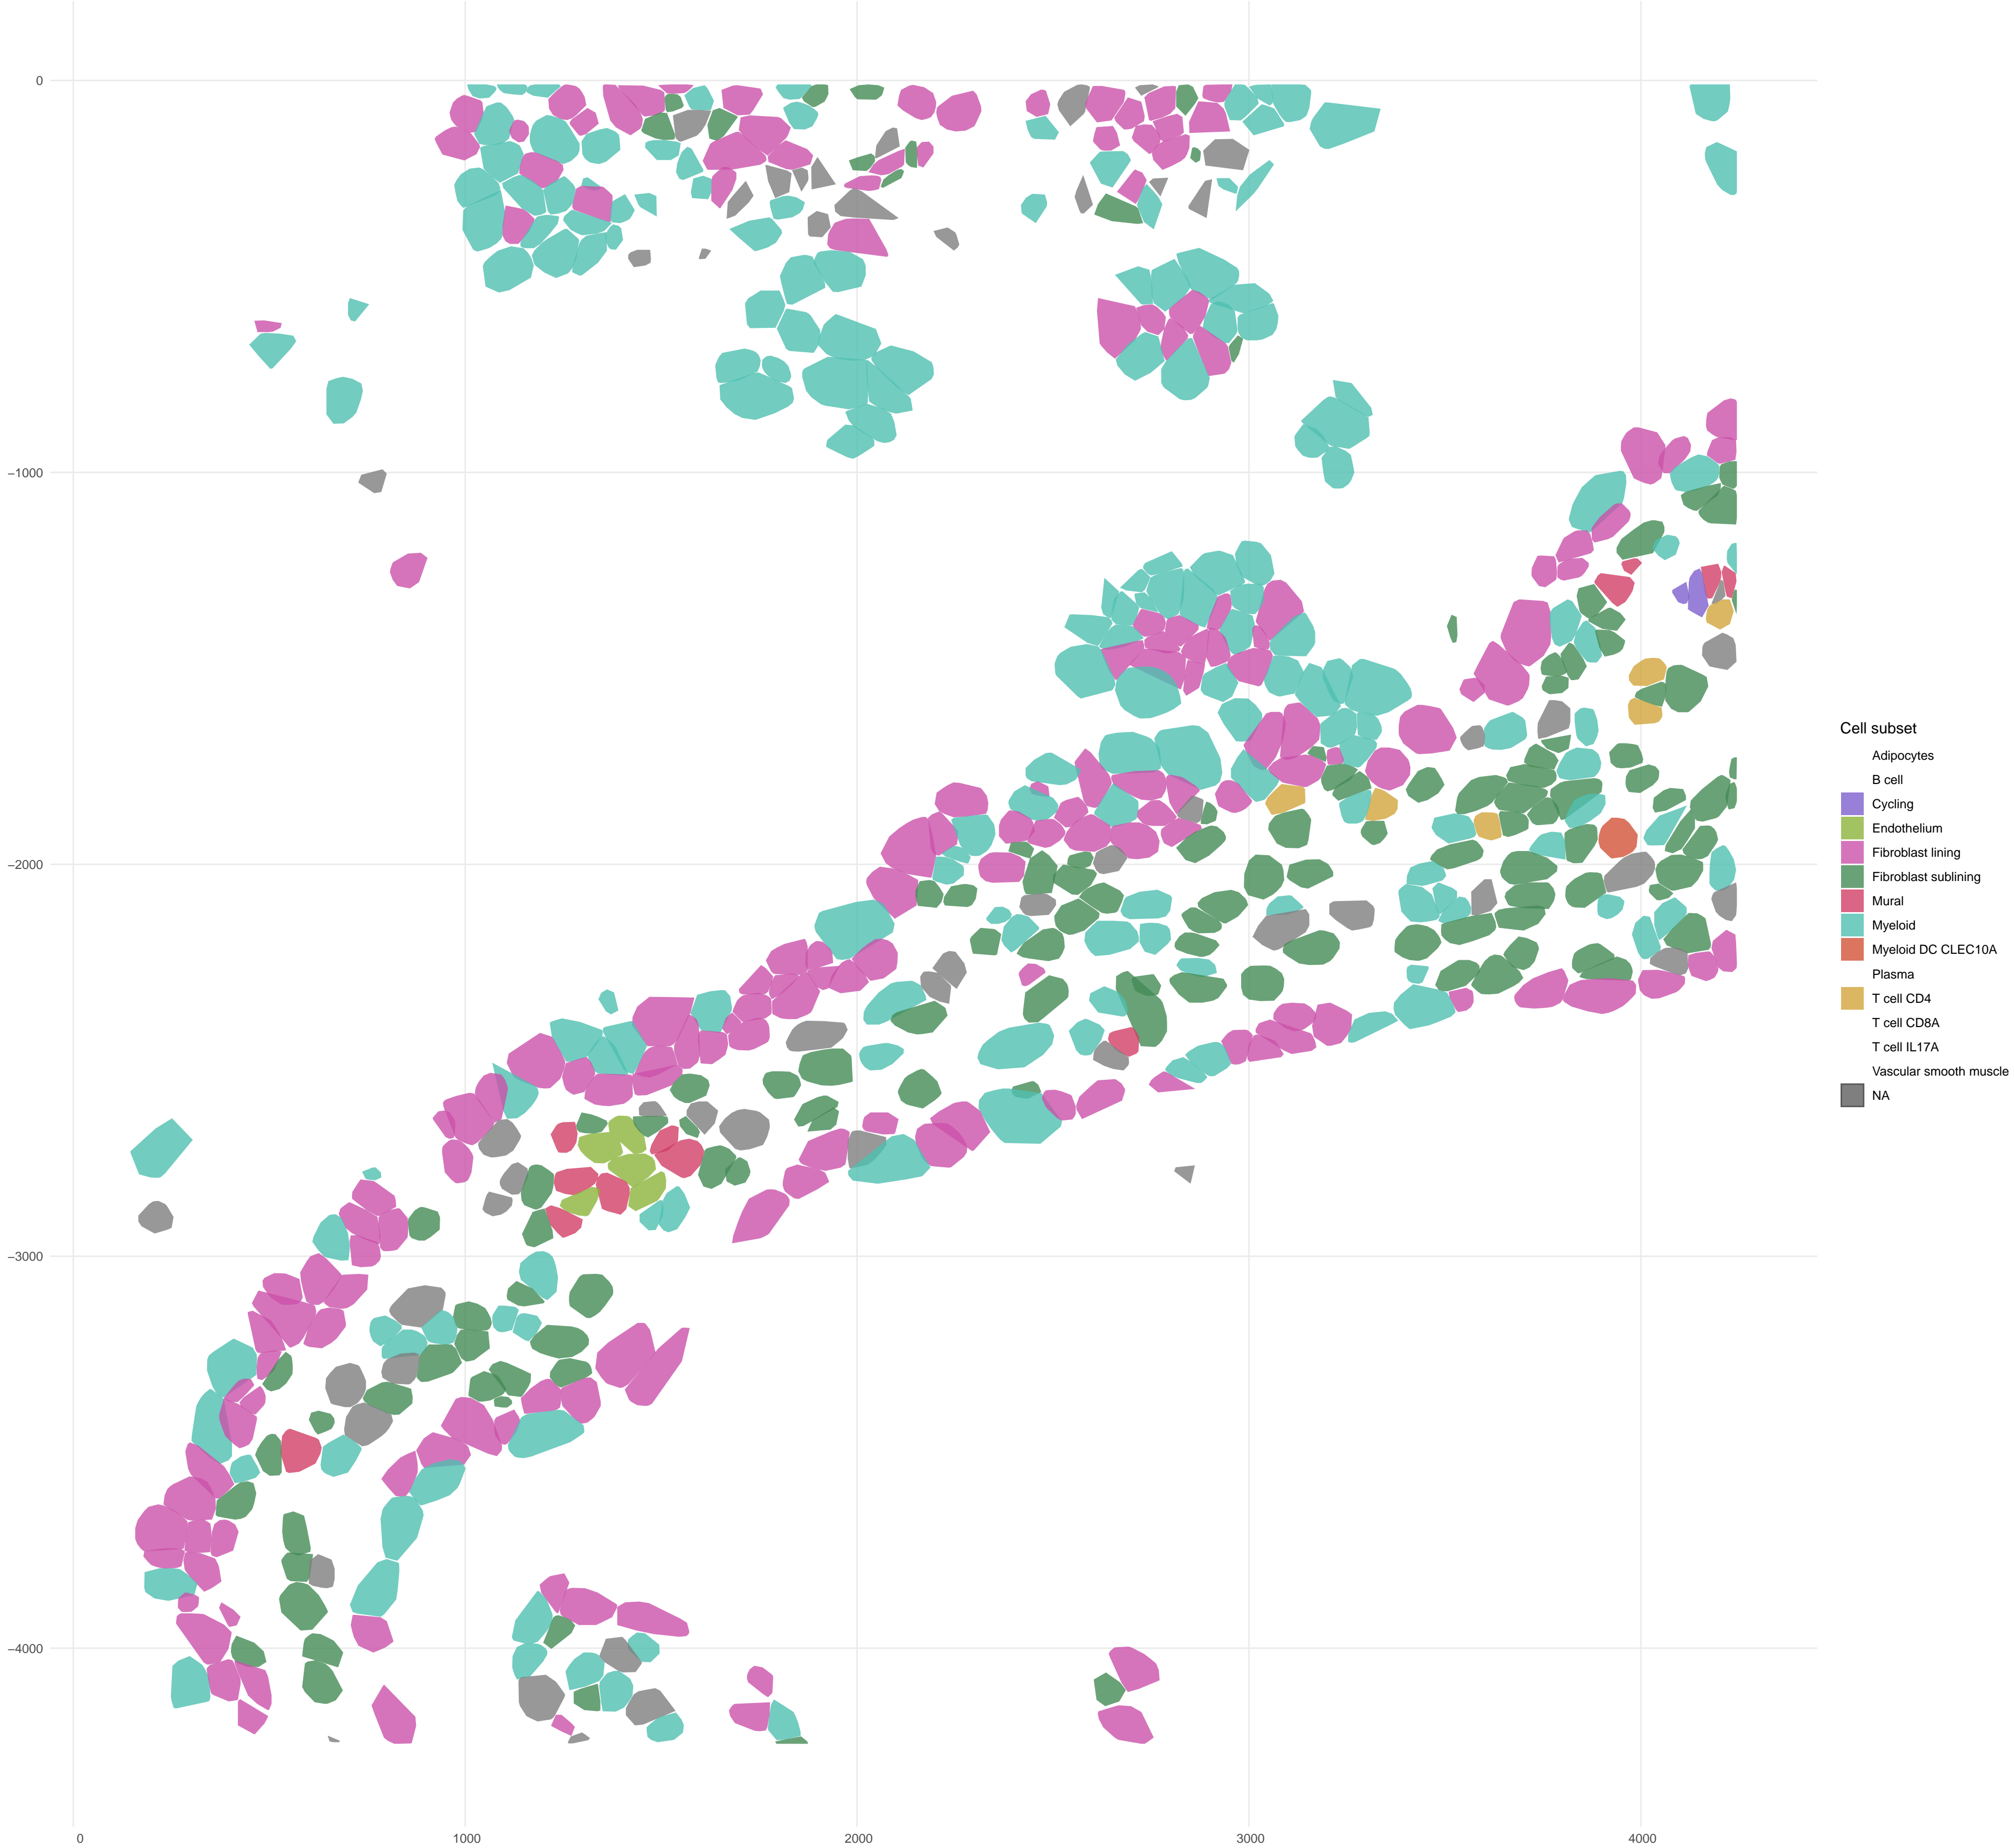

BX441 Post\_Treatment

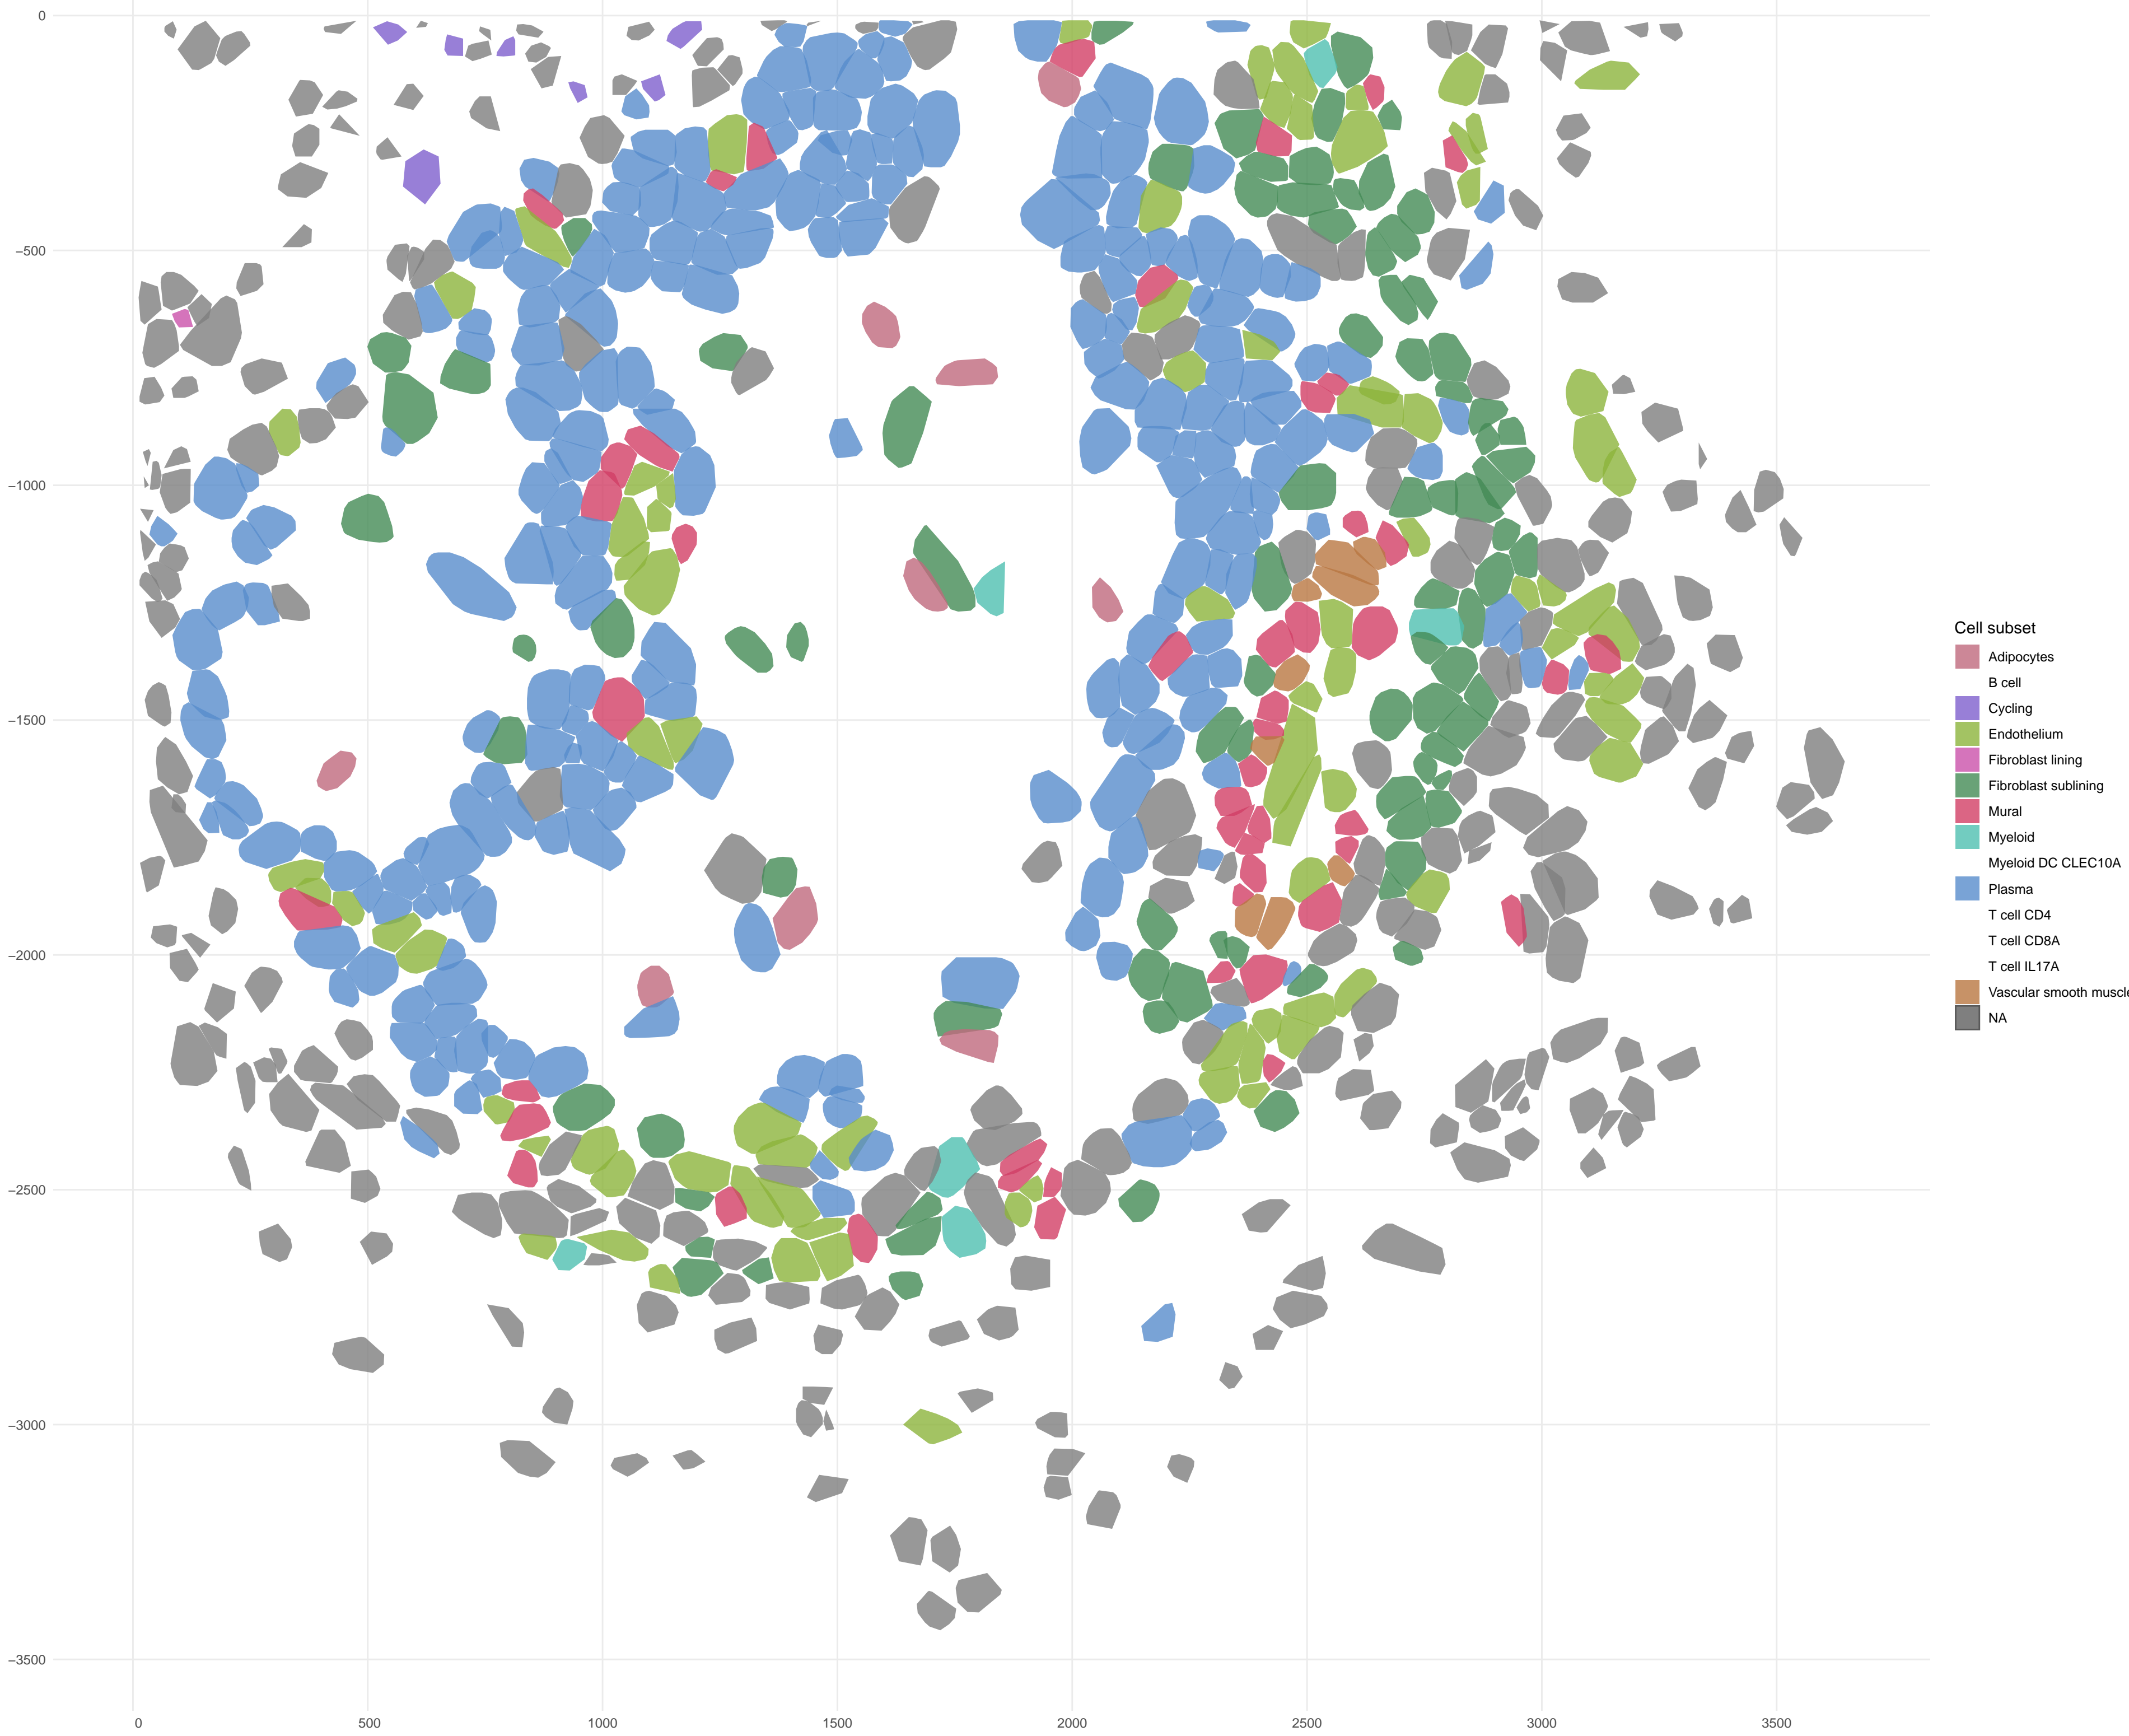



BX423 Baseline

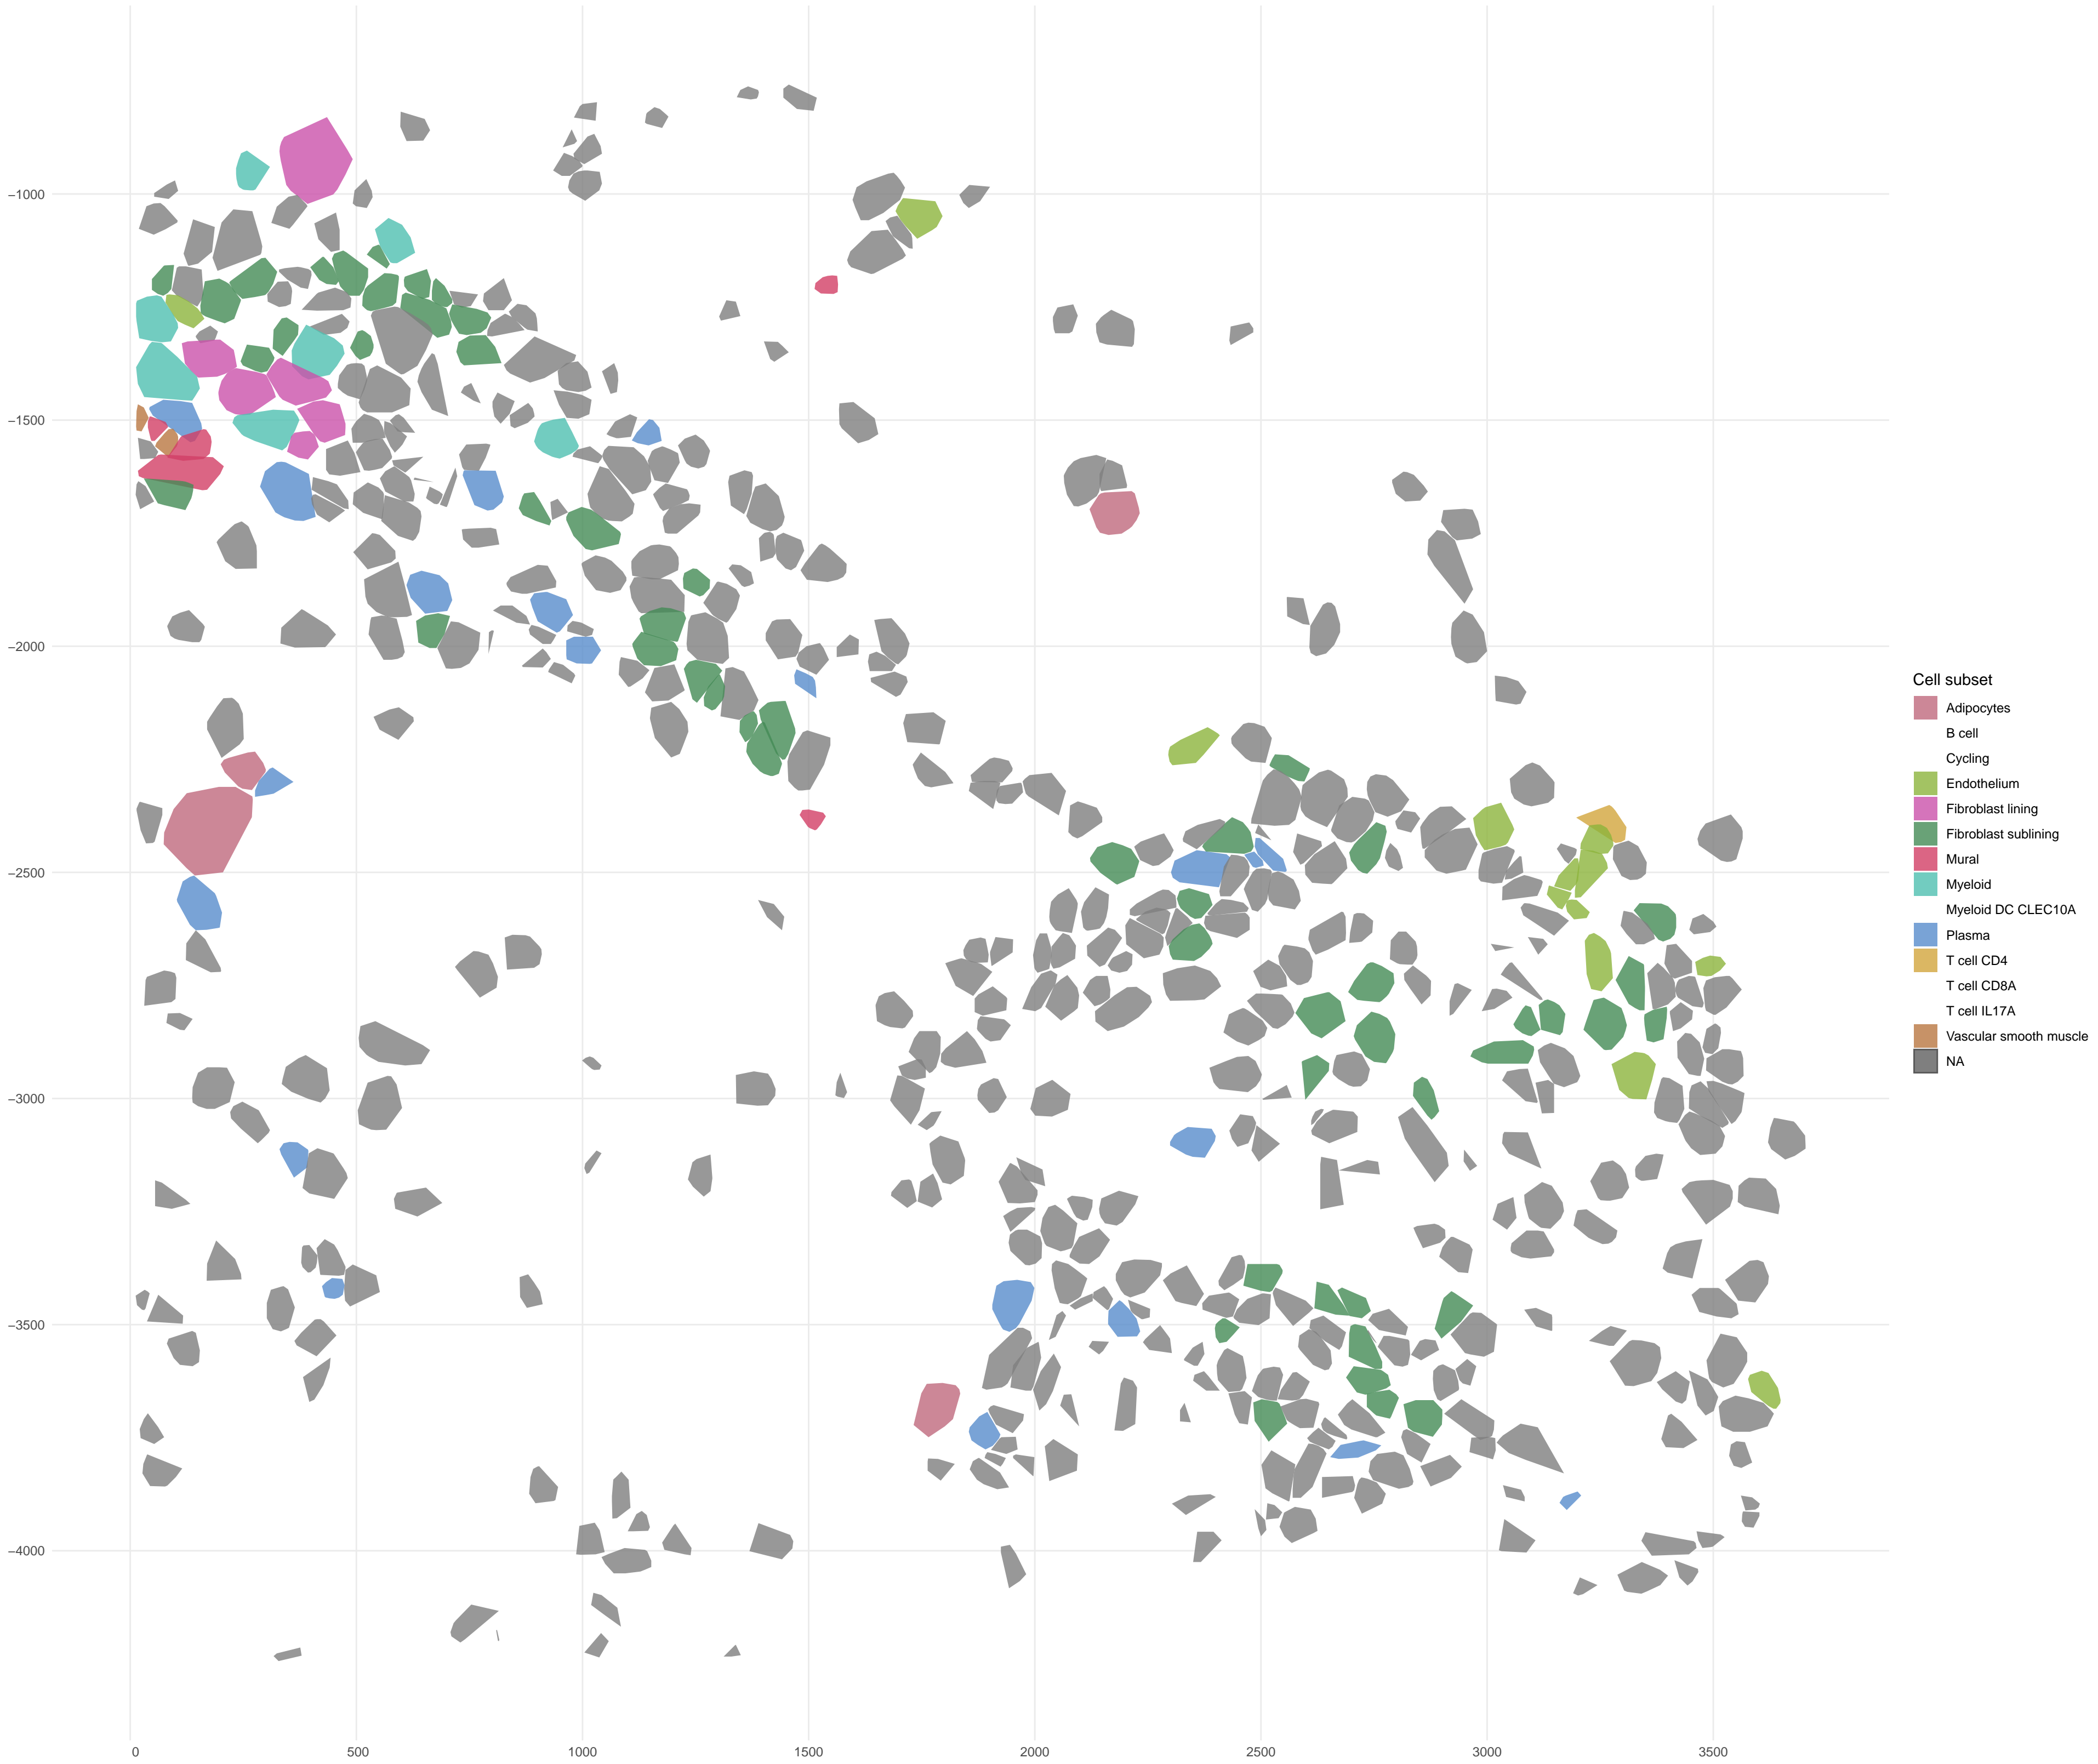

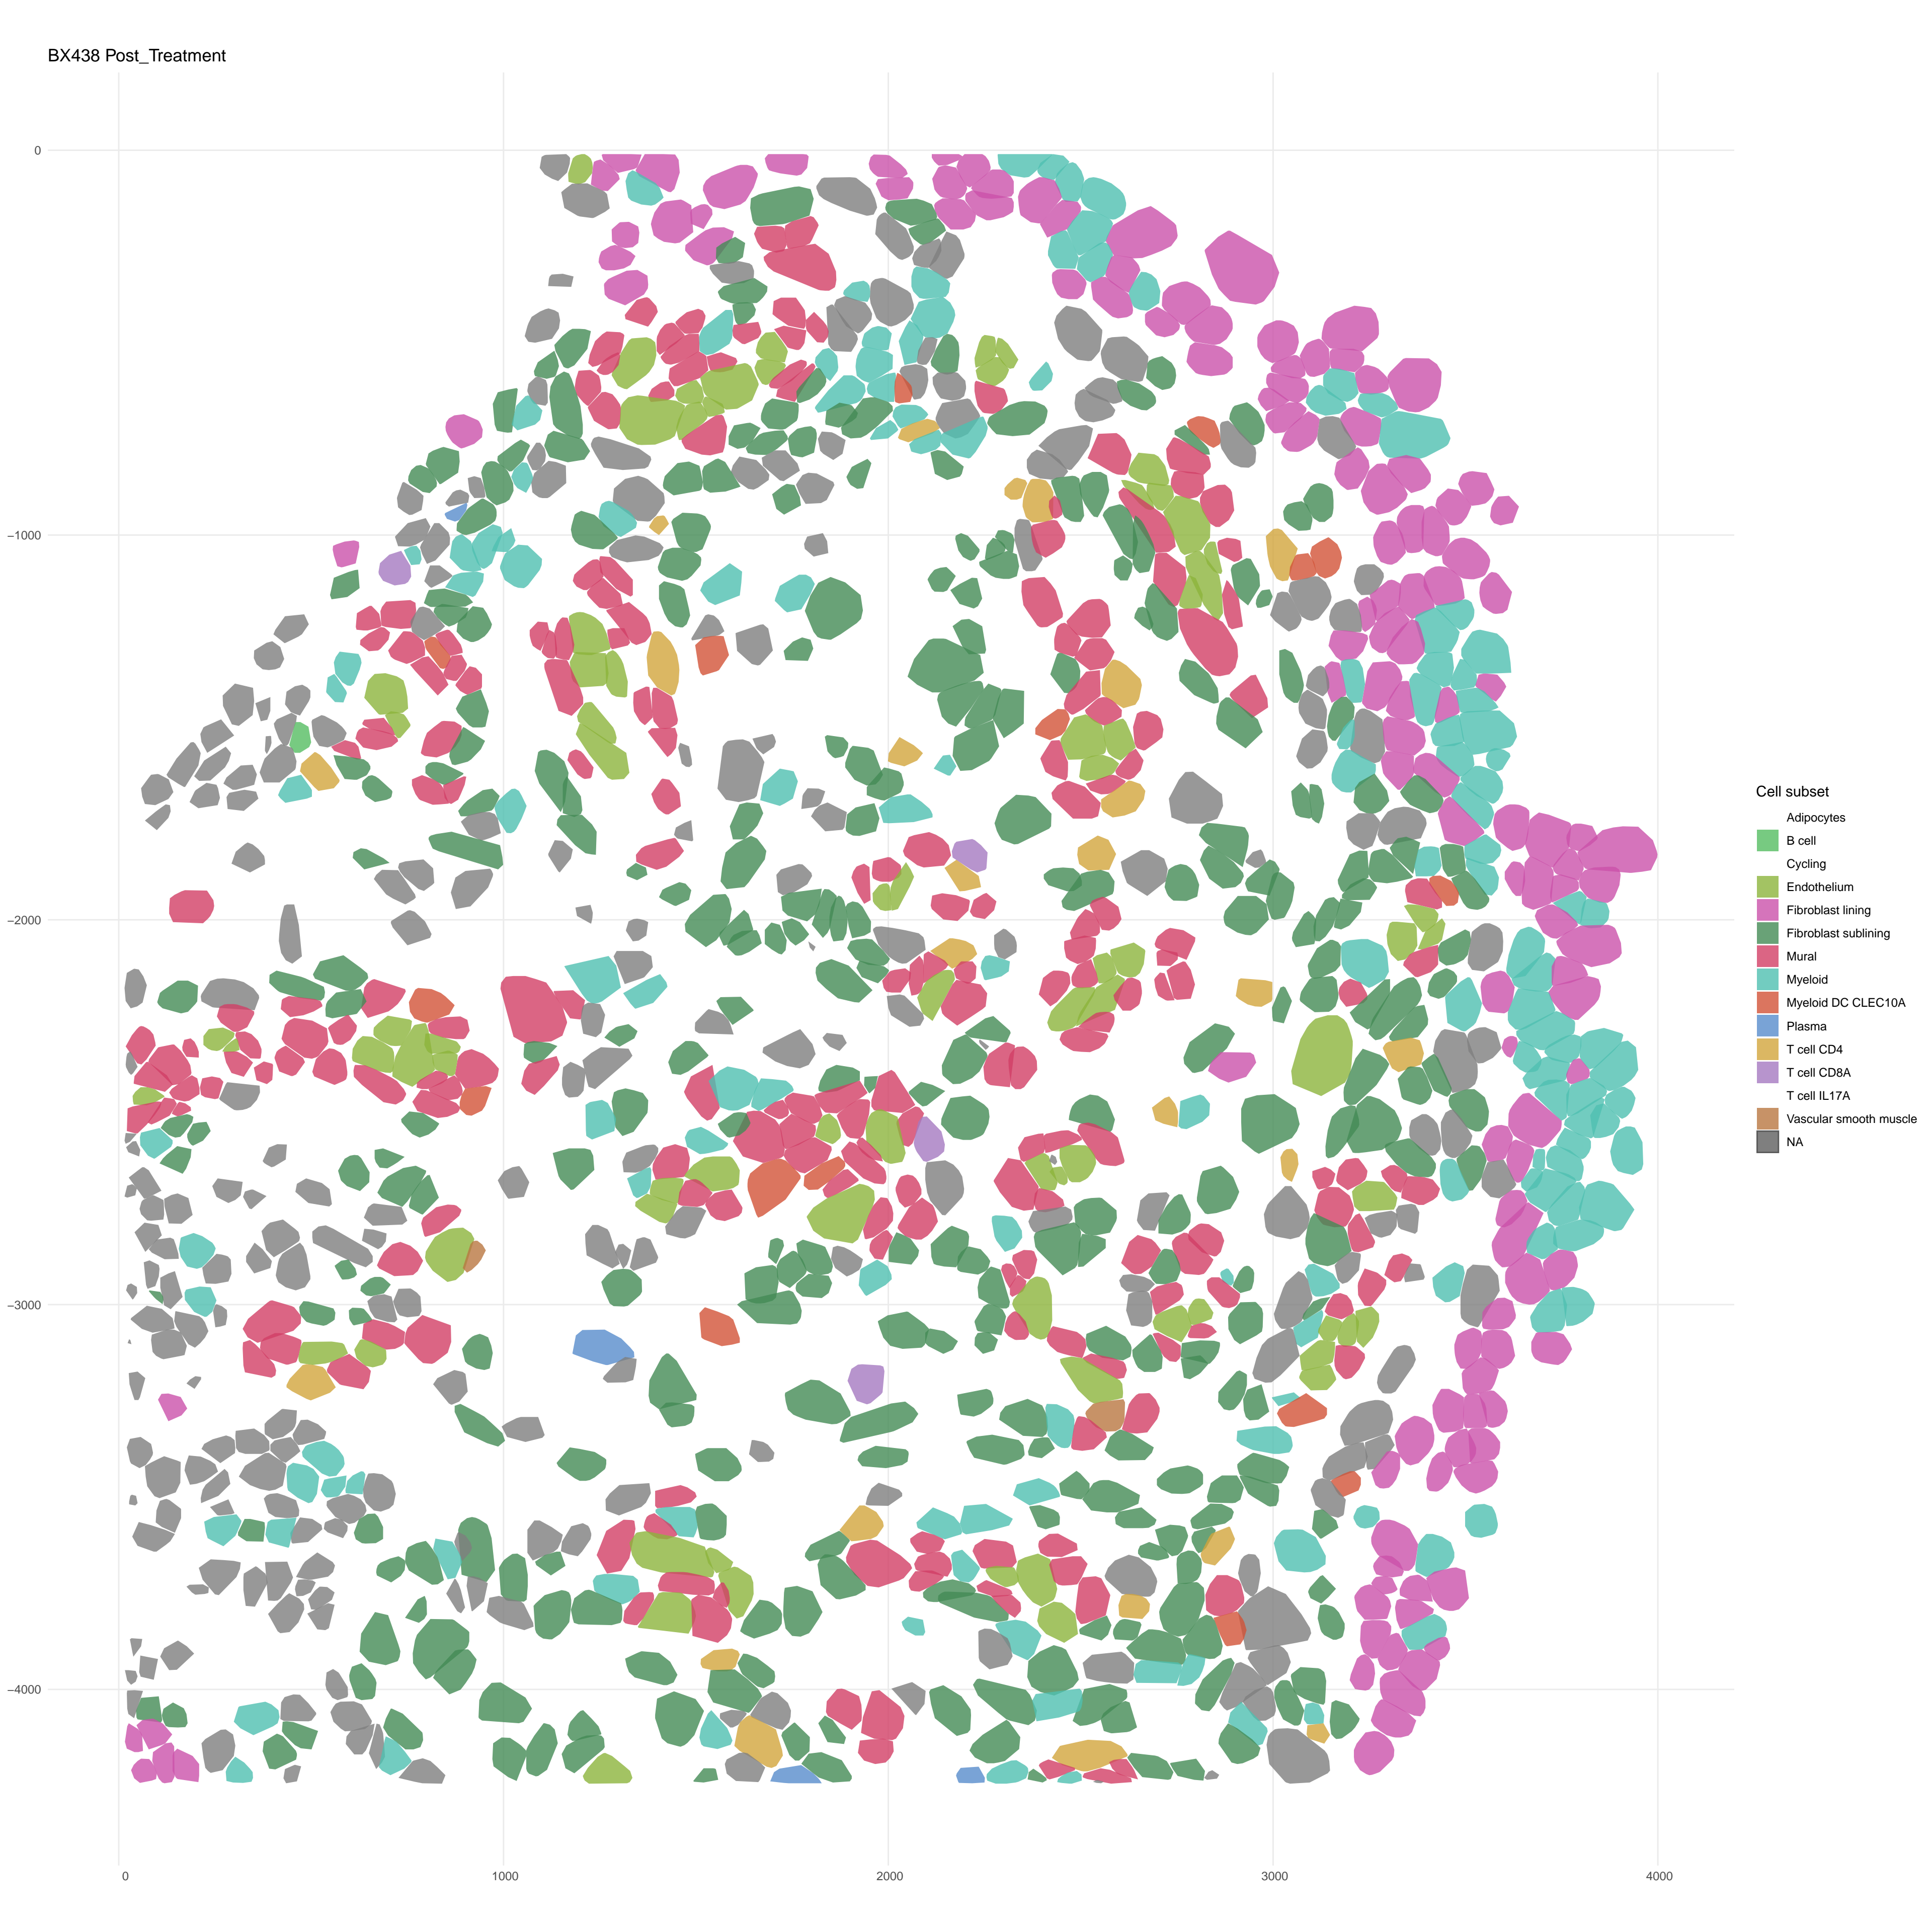

BX417 Baseline

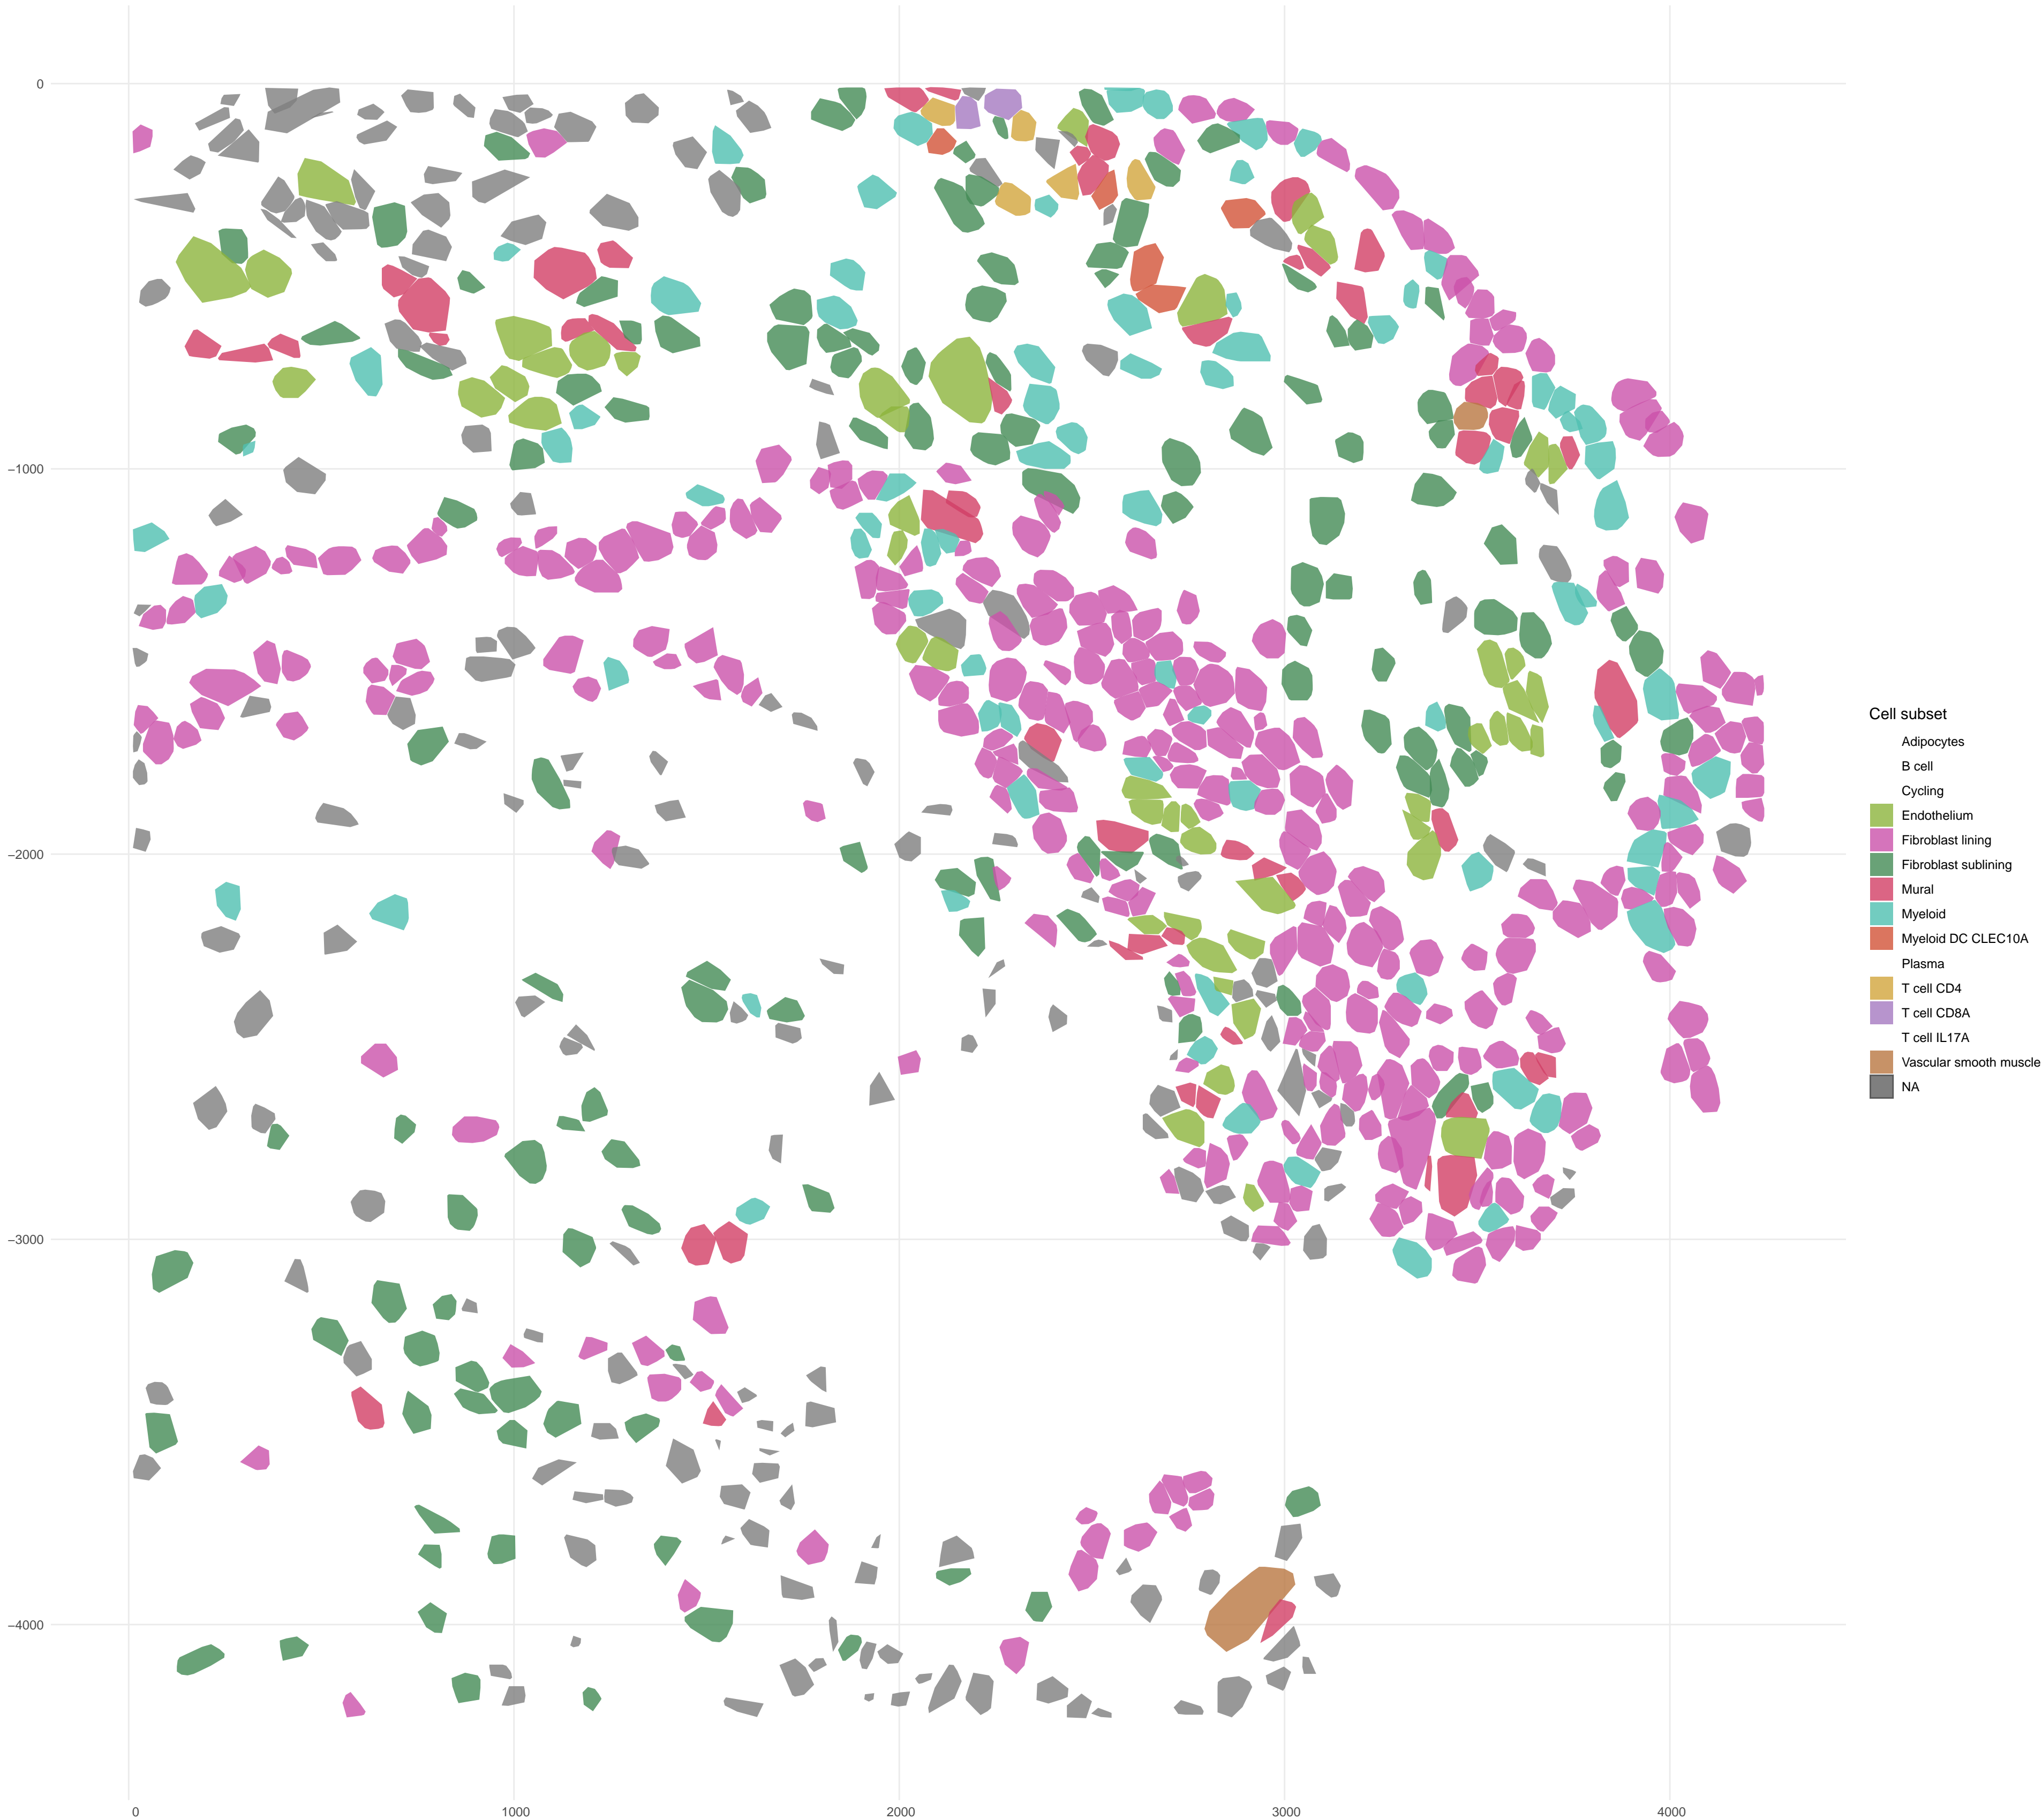



BX439 Post\_Treatment

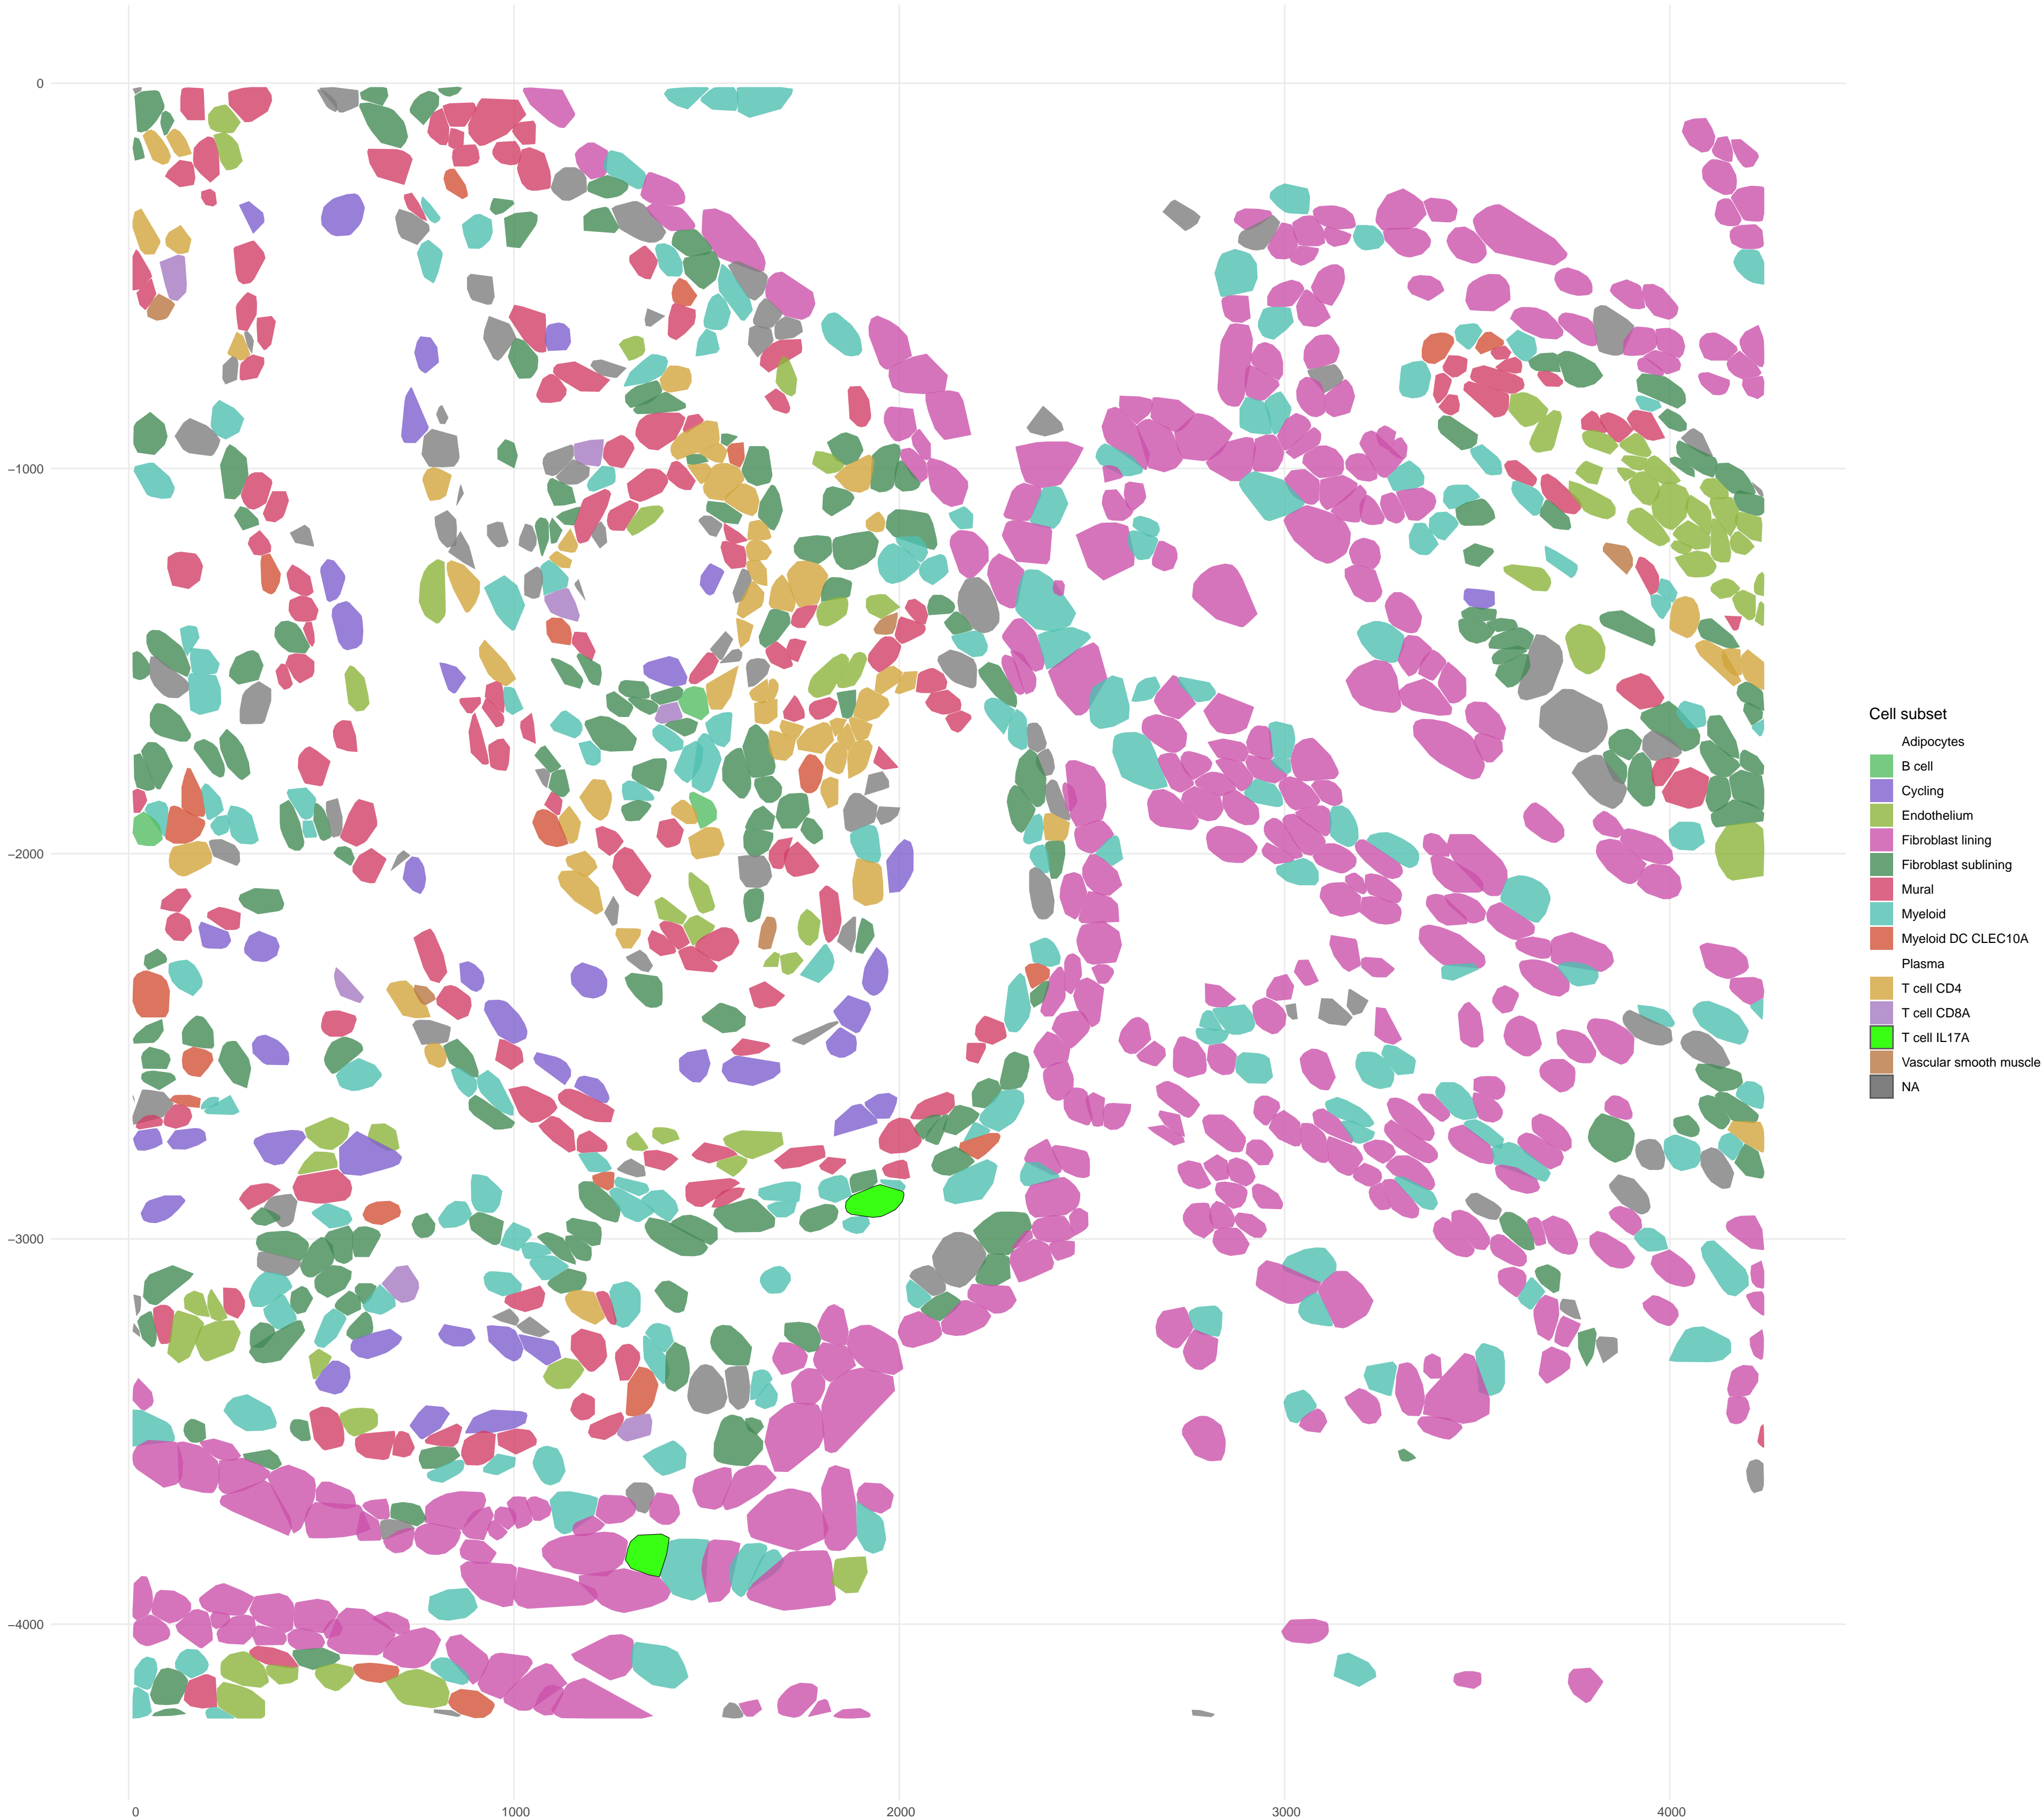

BX417 Baseline

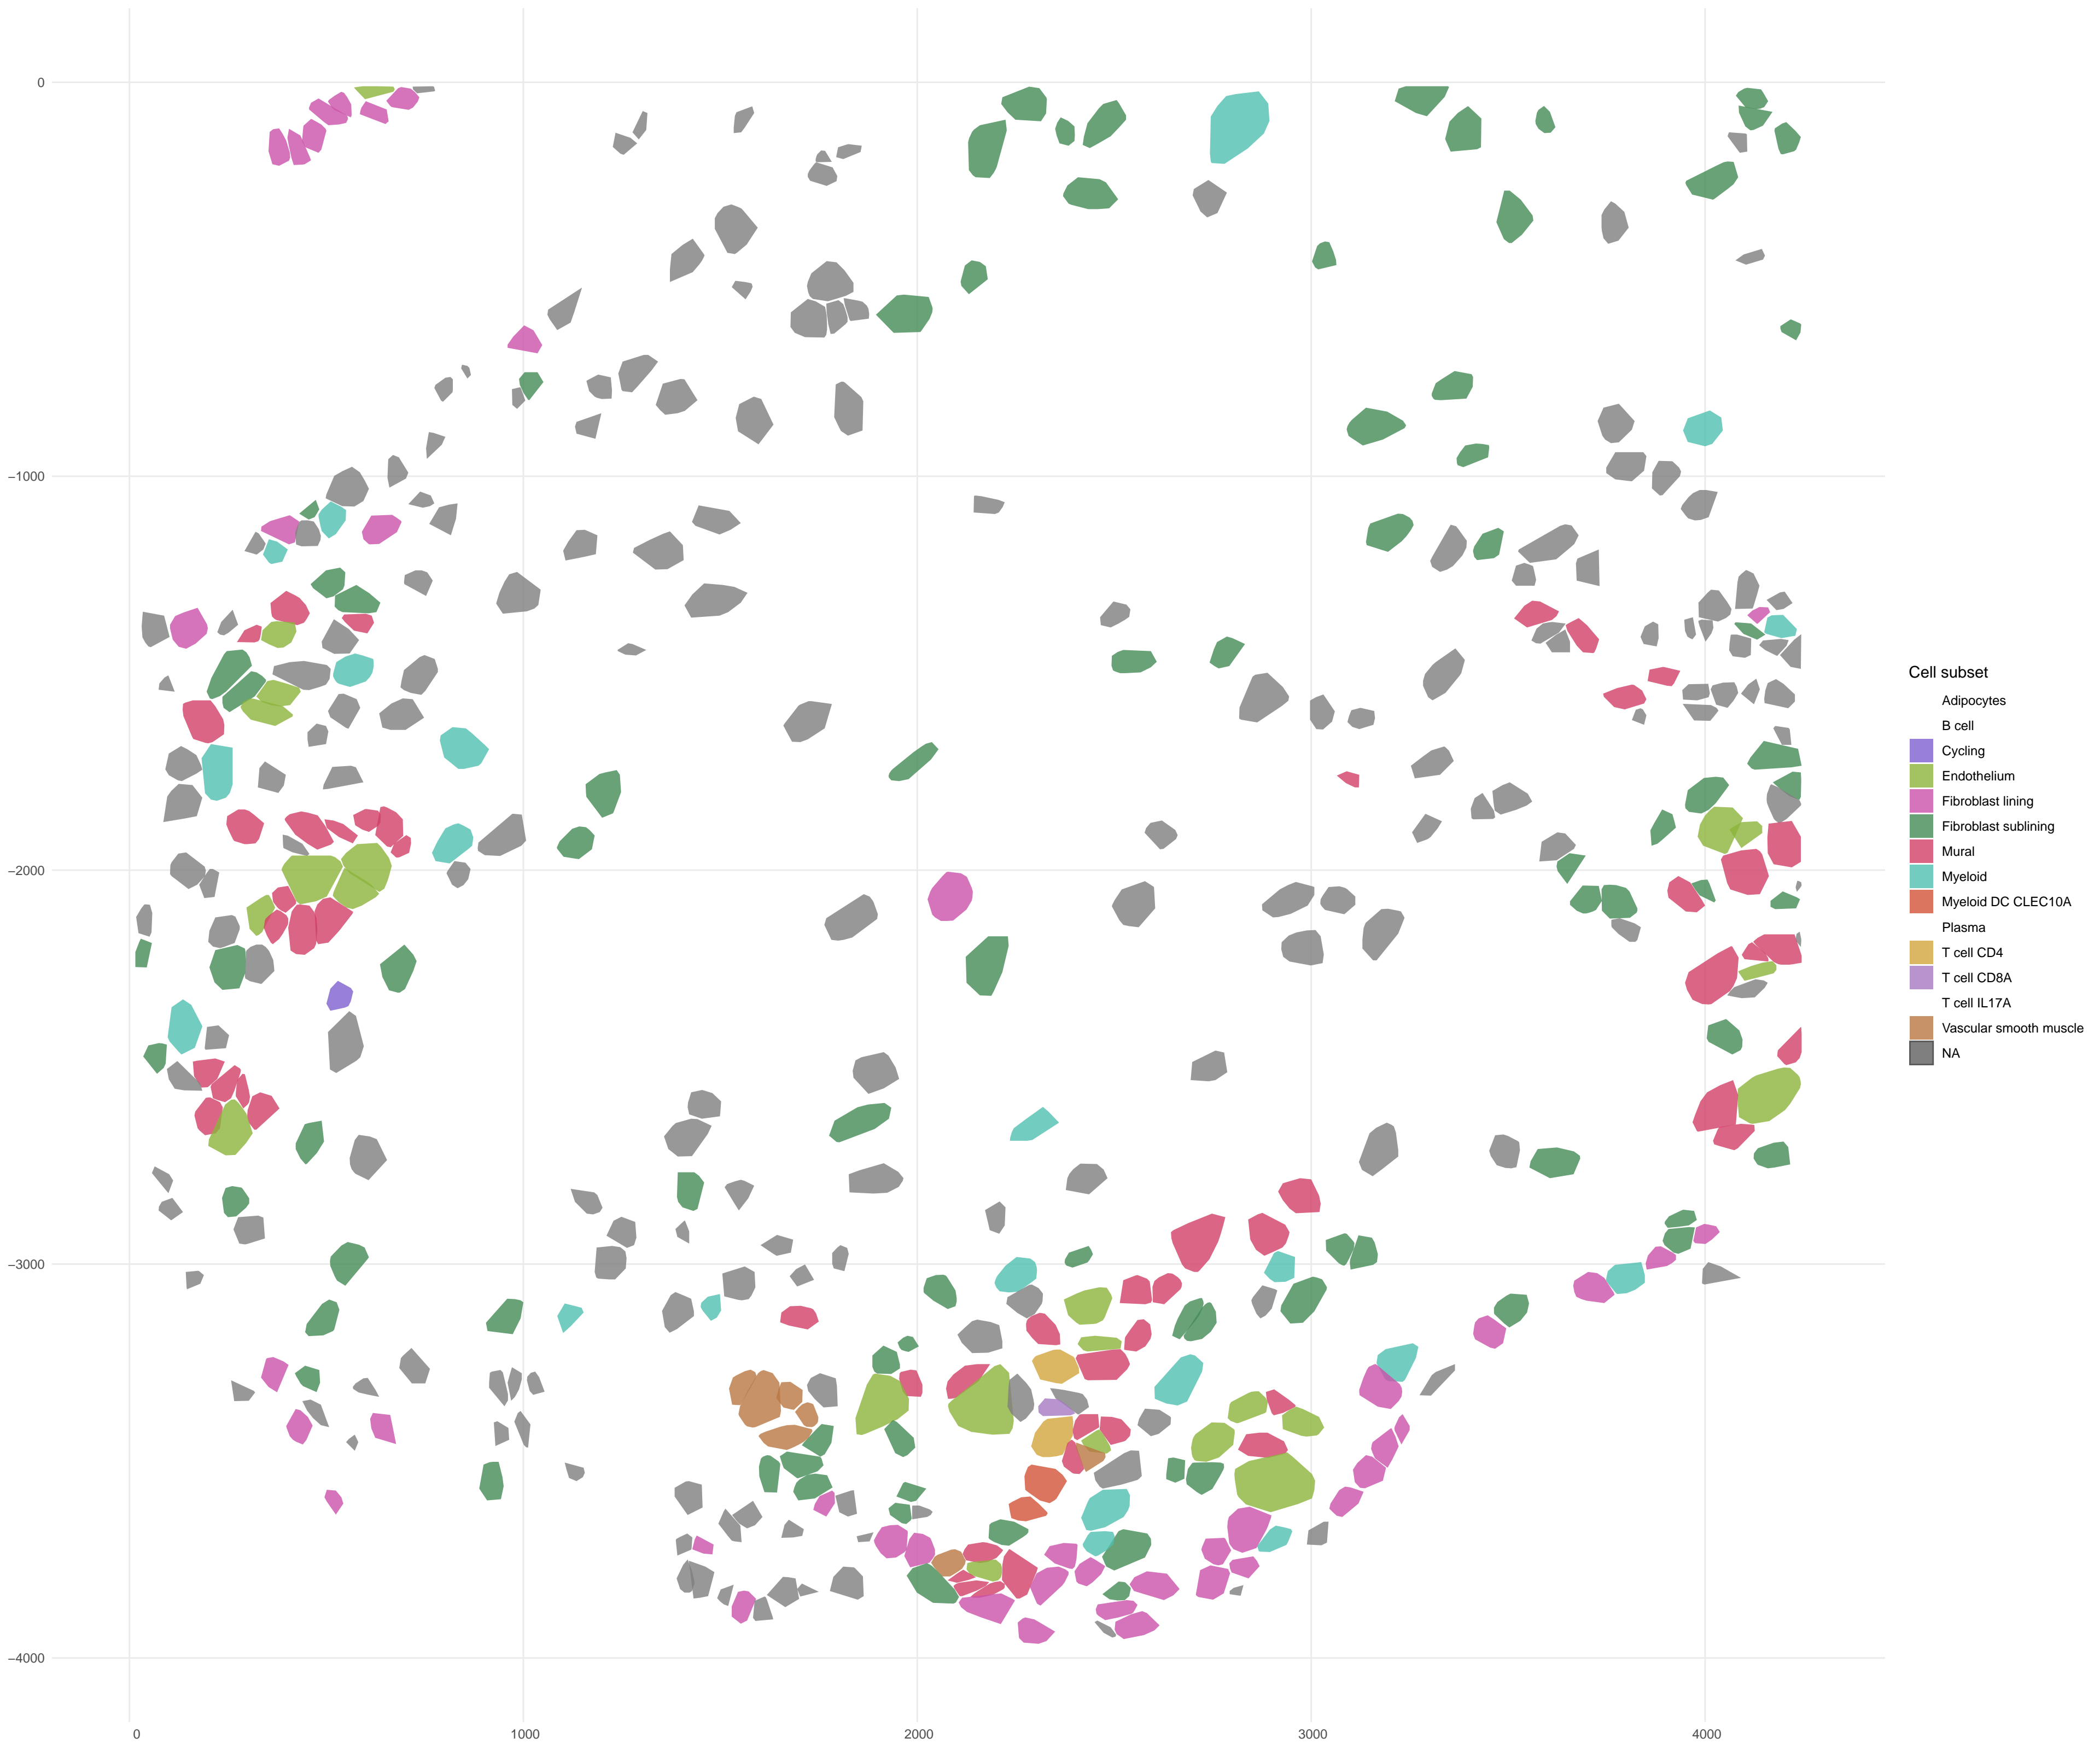

BX439 Post\_Treatment

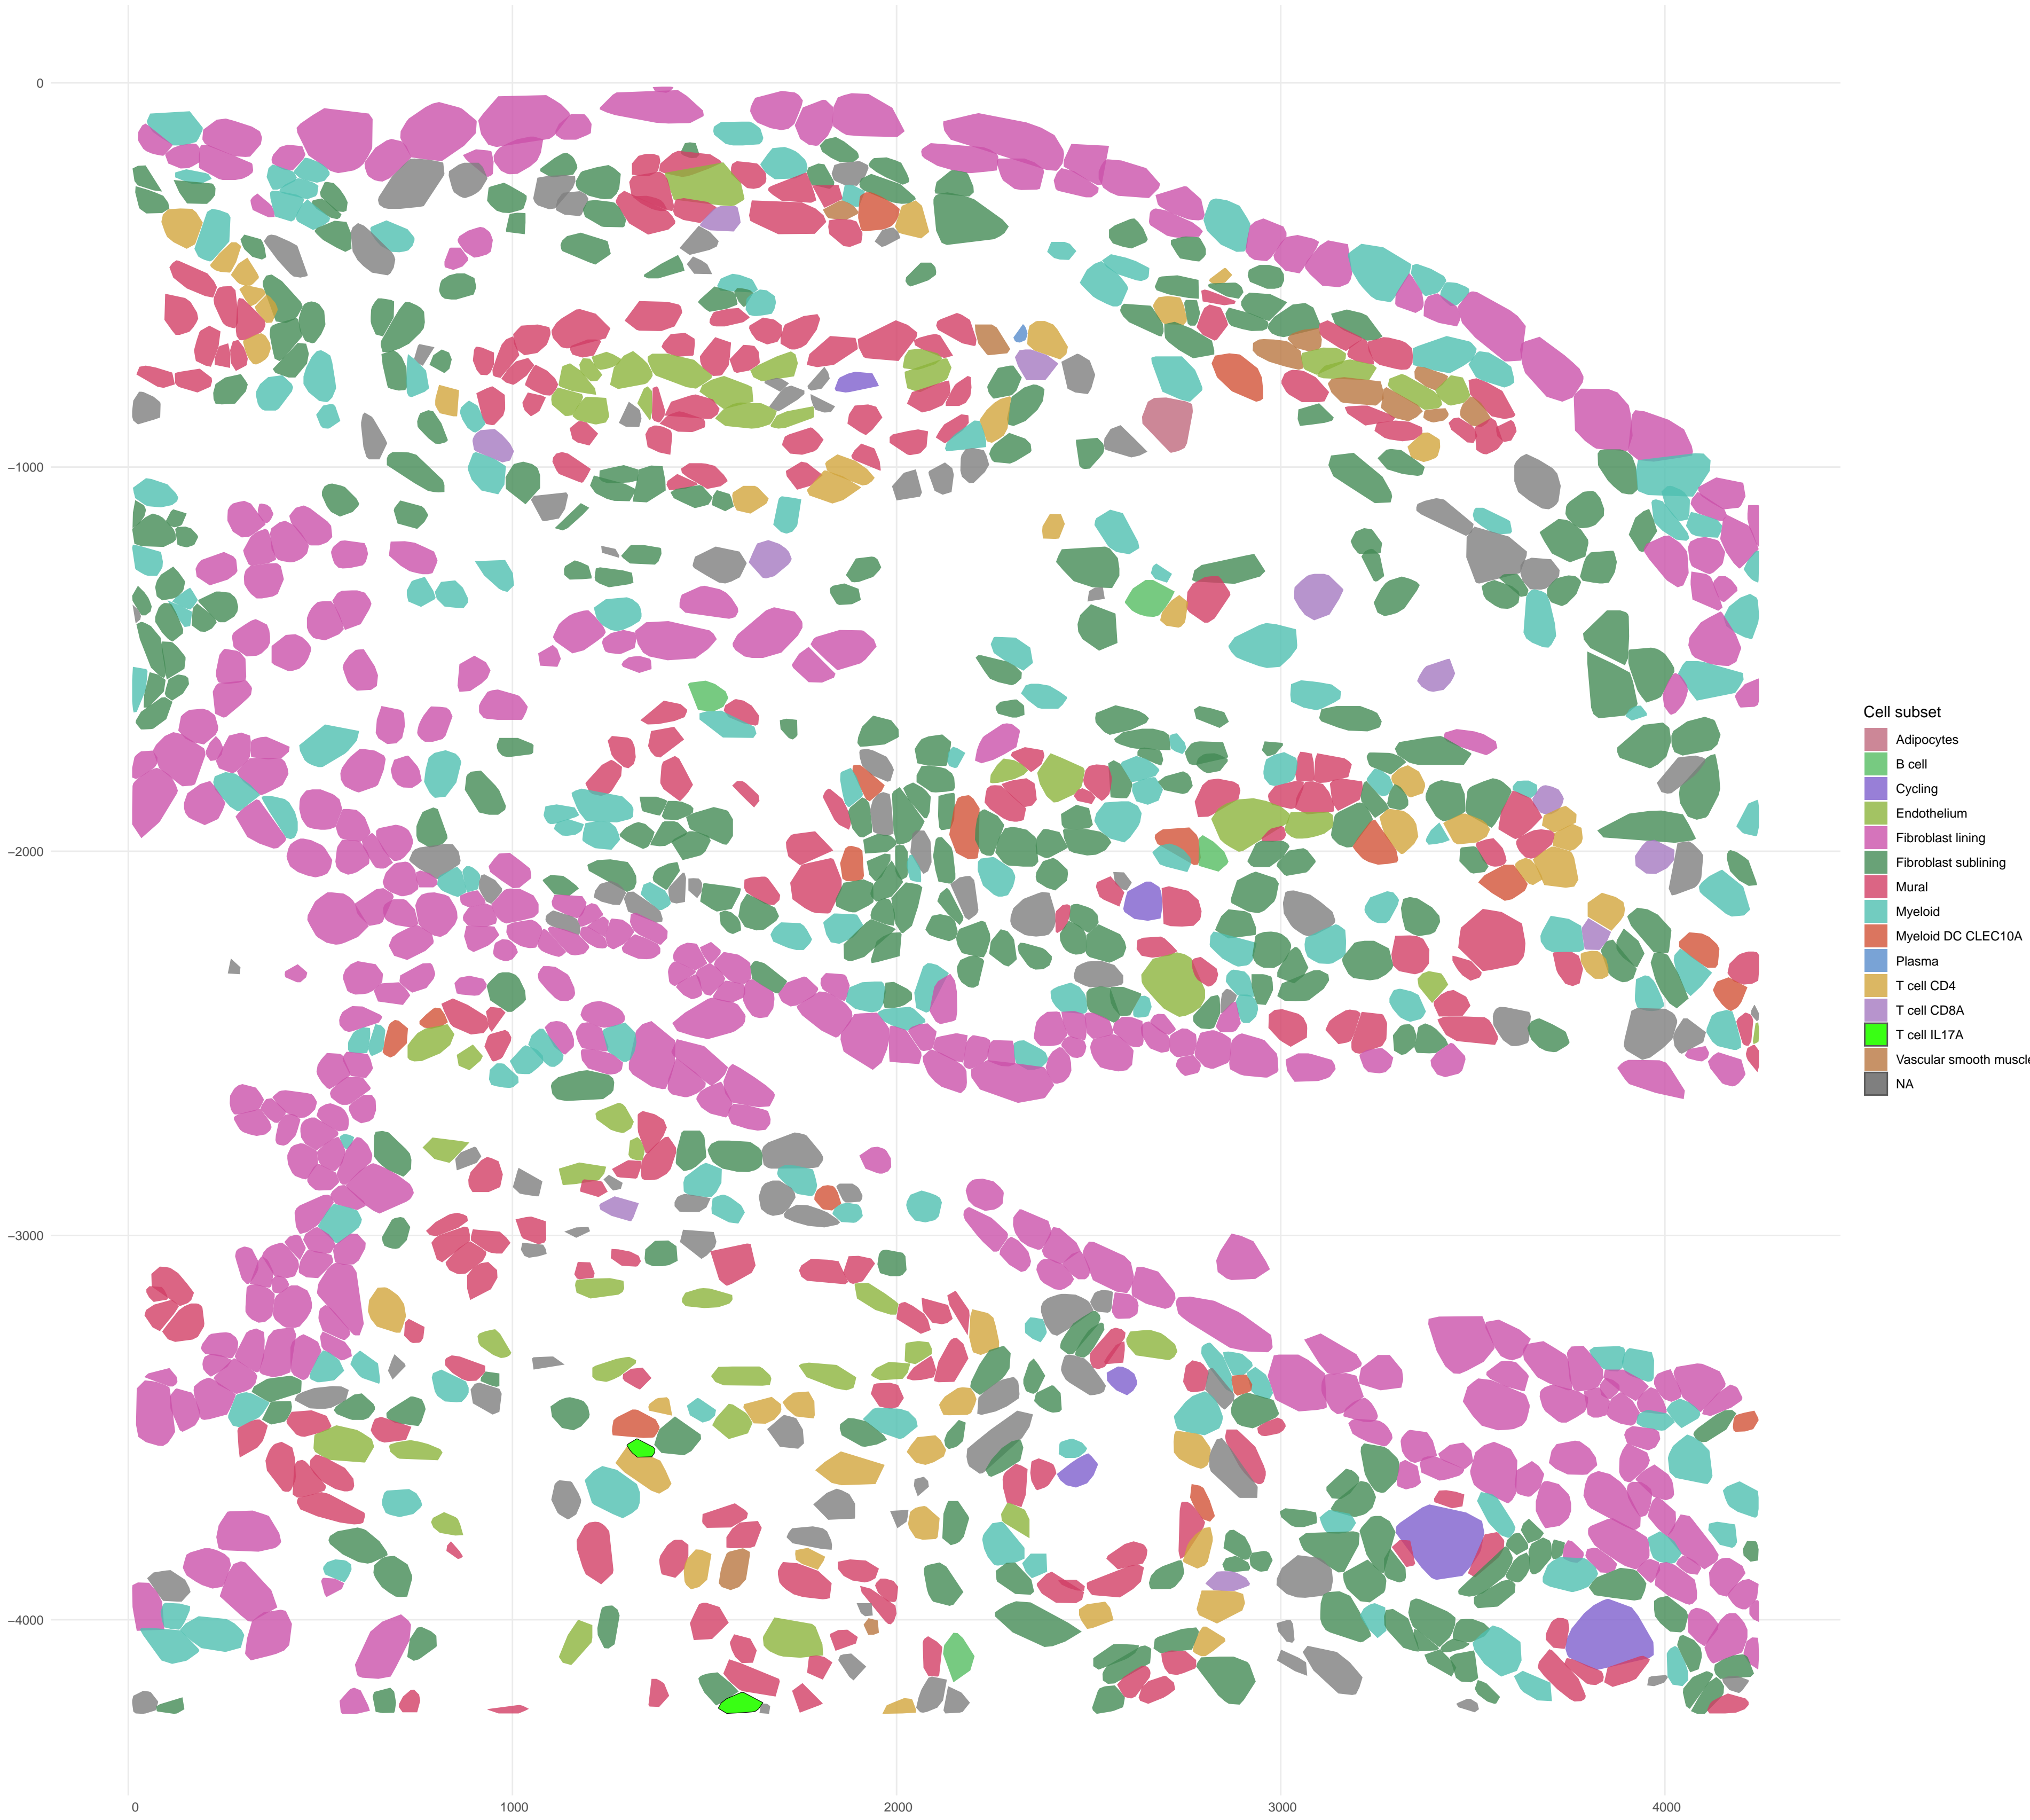



BX417 Baseline

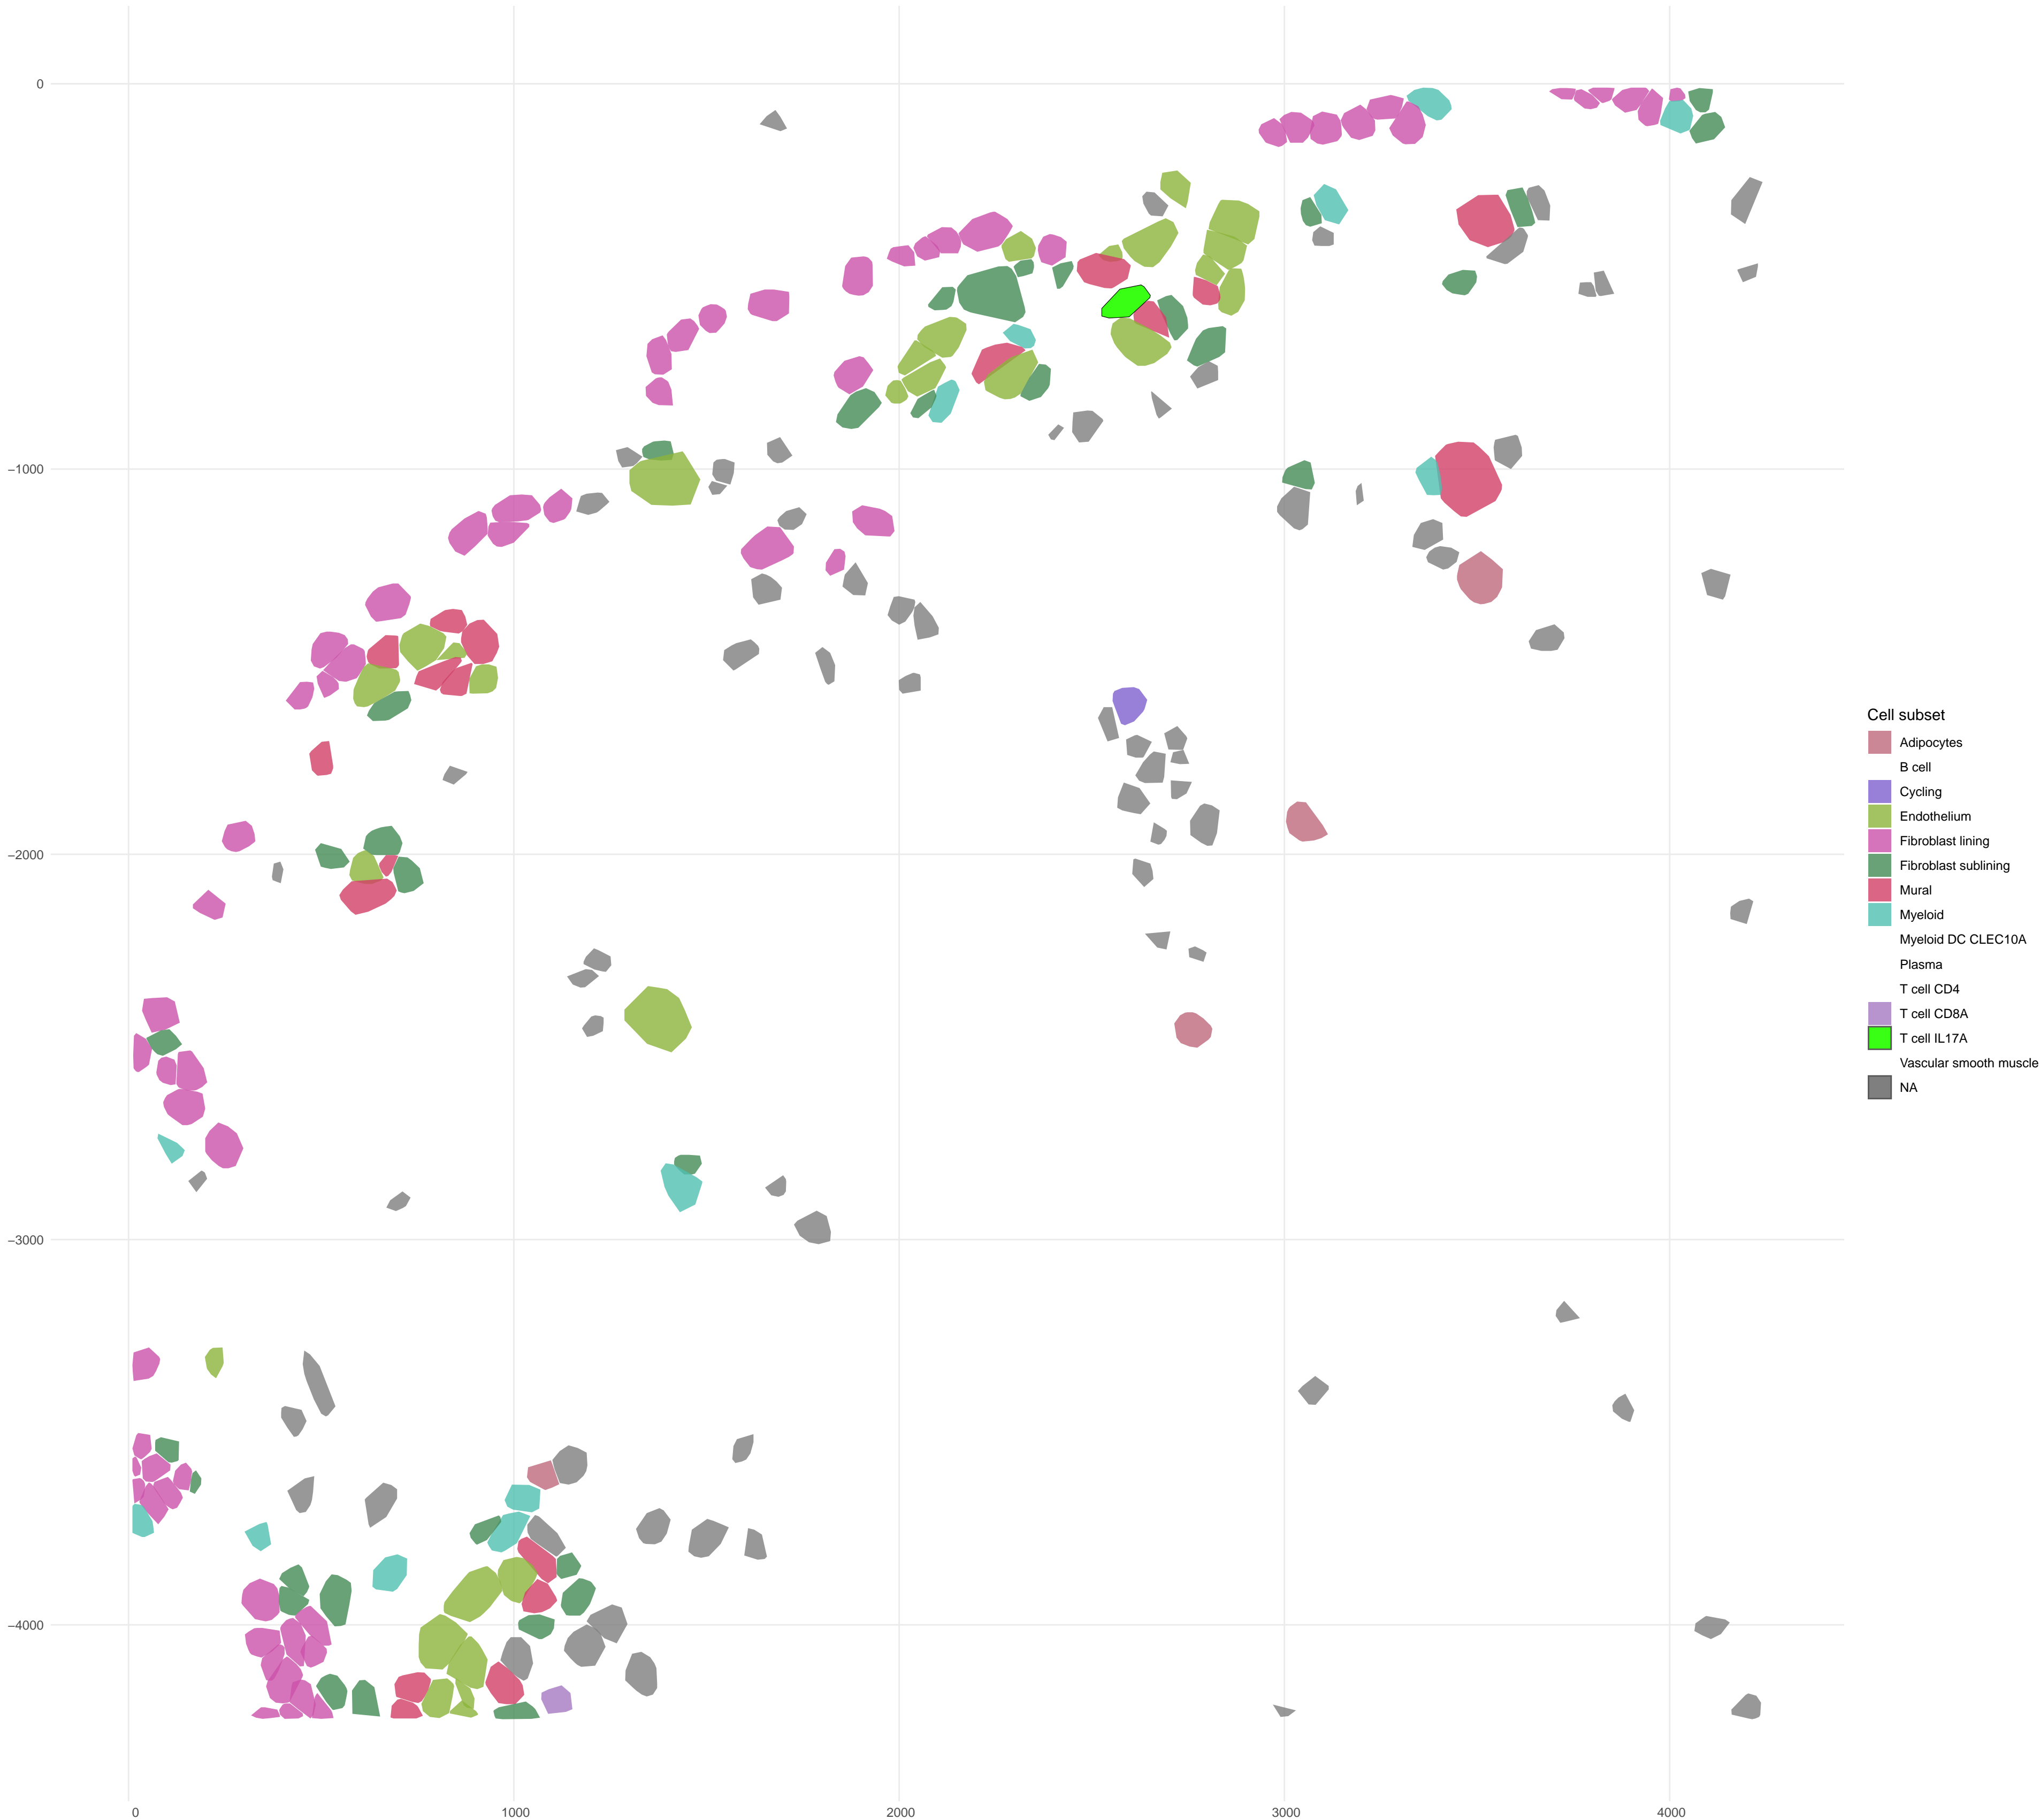

BX439 Post\_Treatment

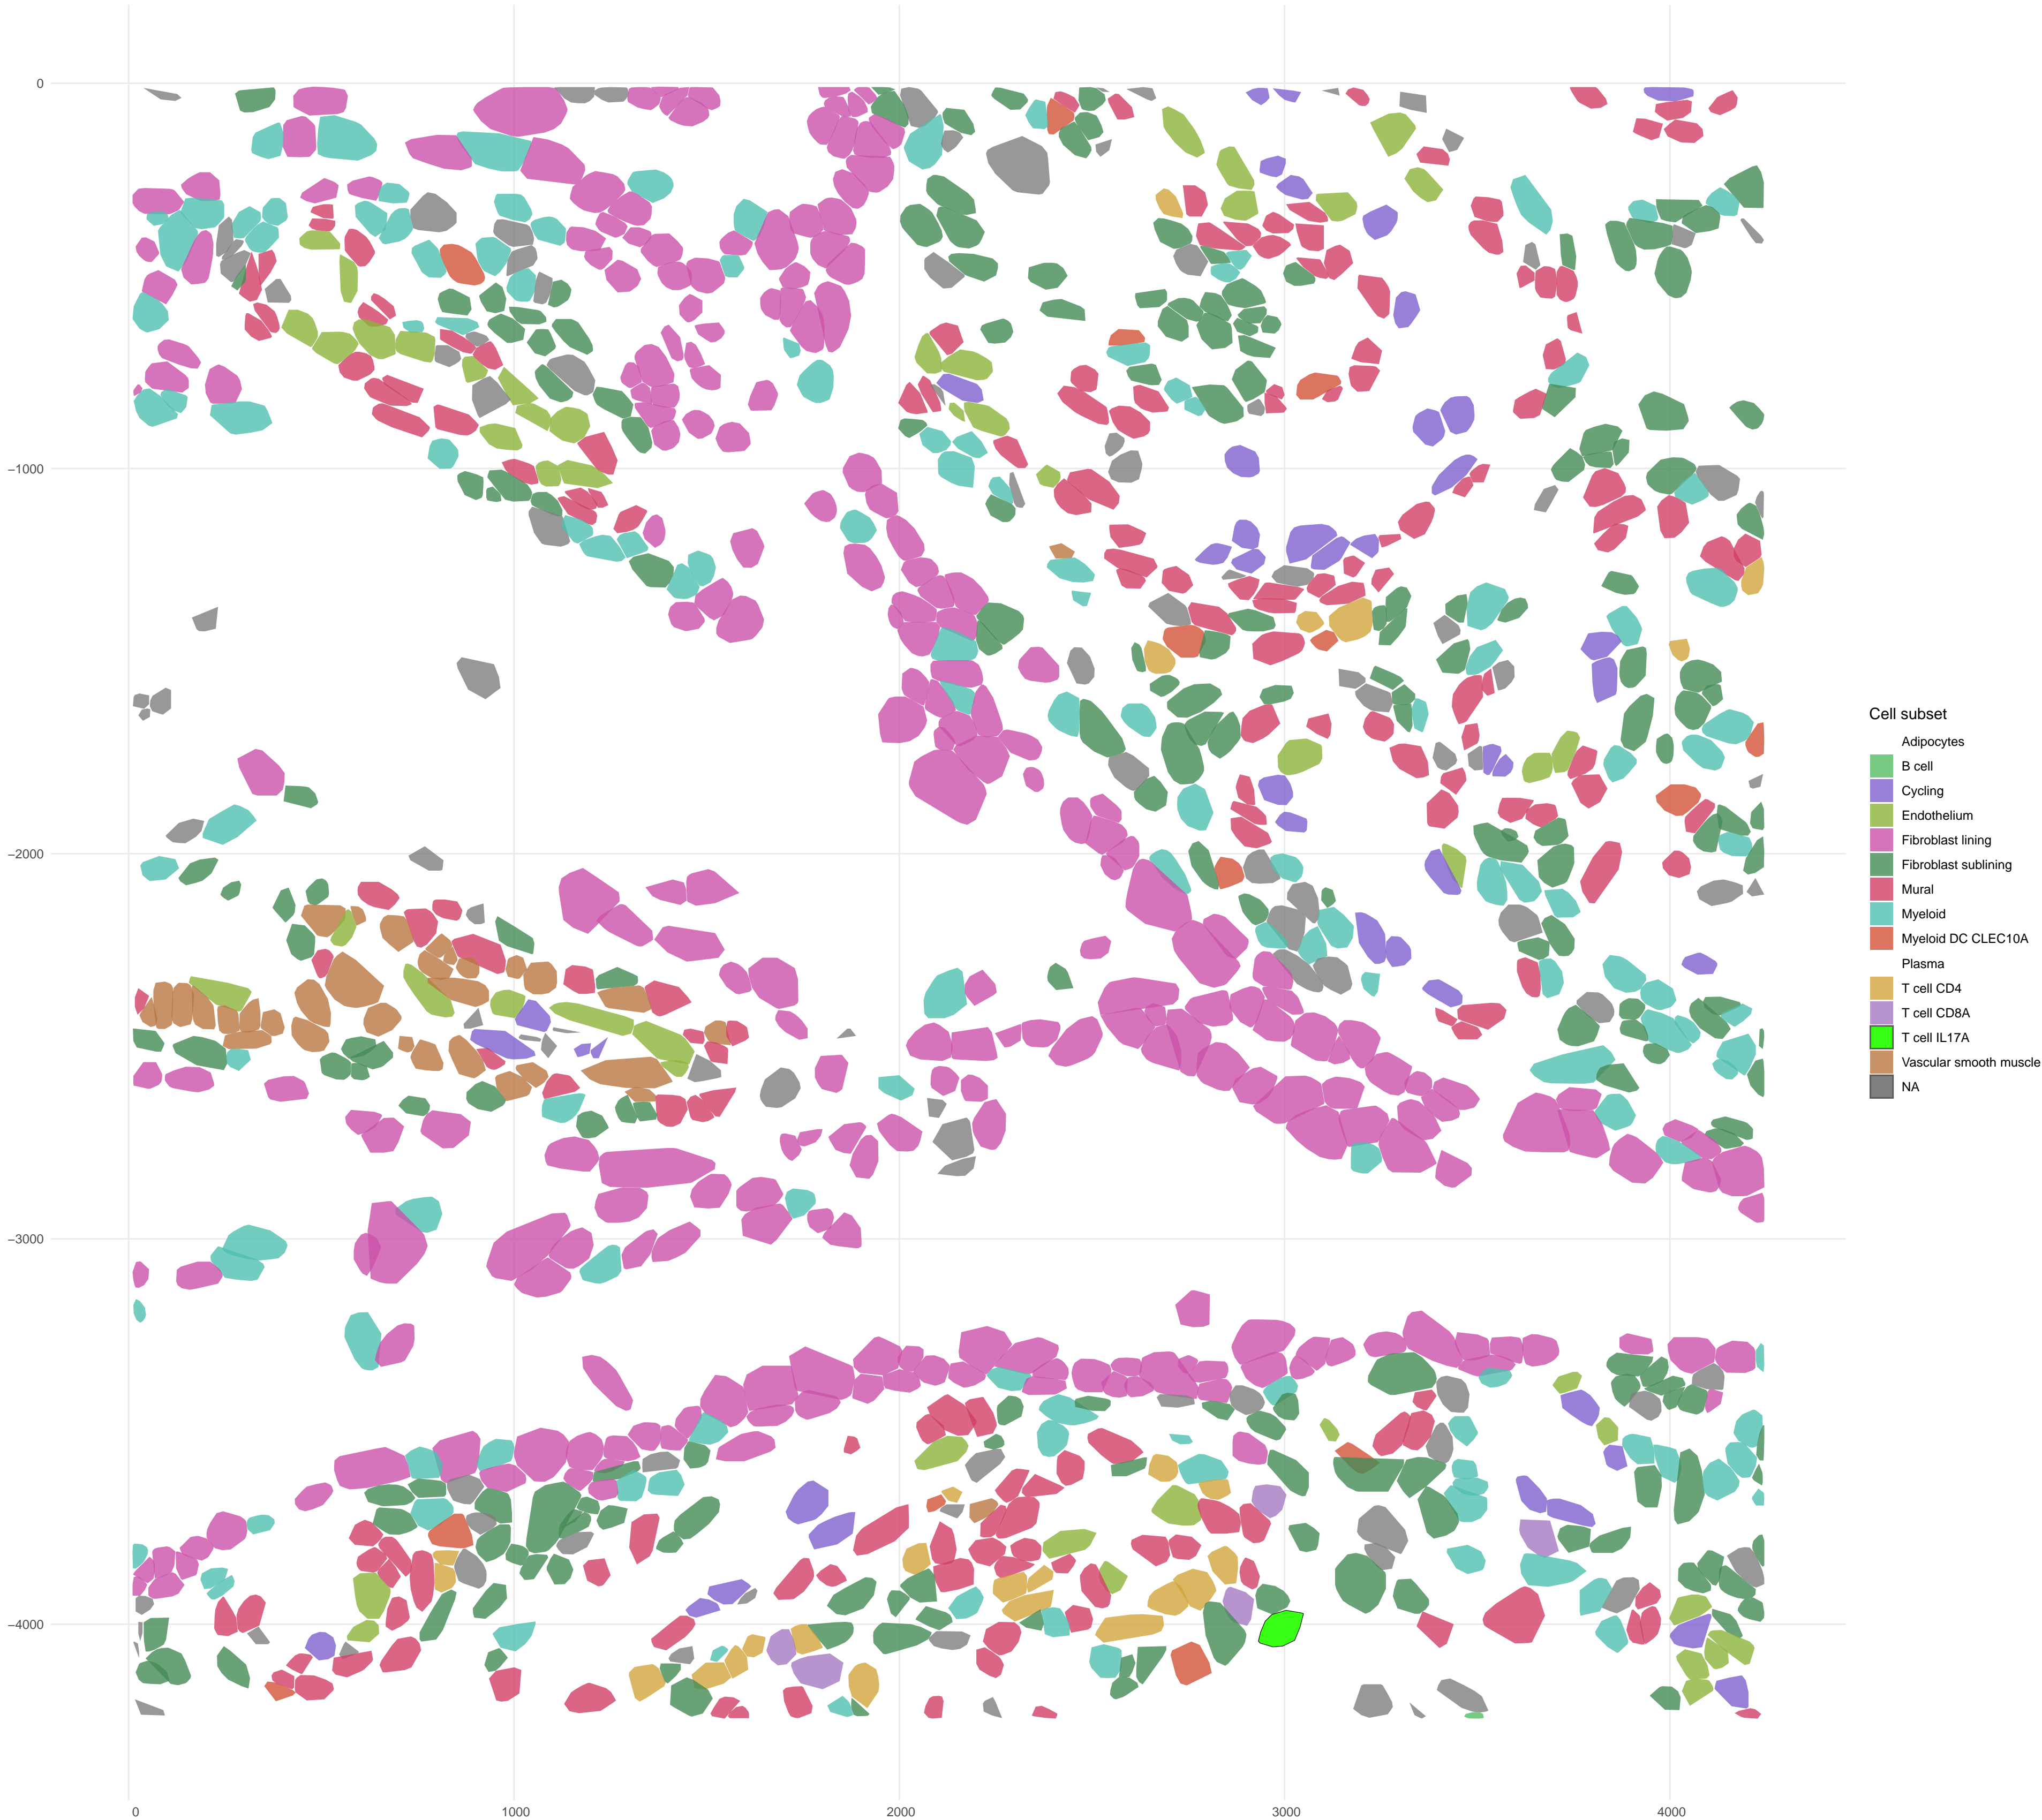

BX417 Baseline

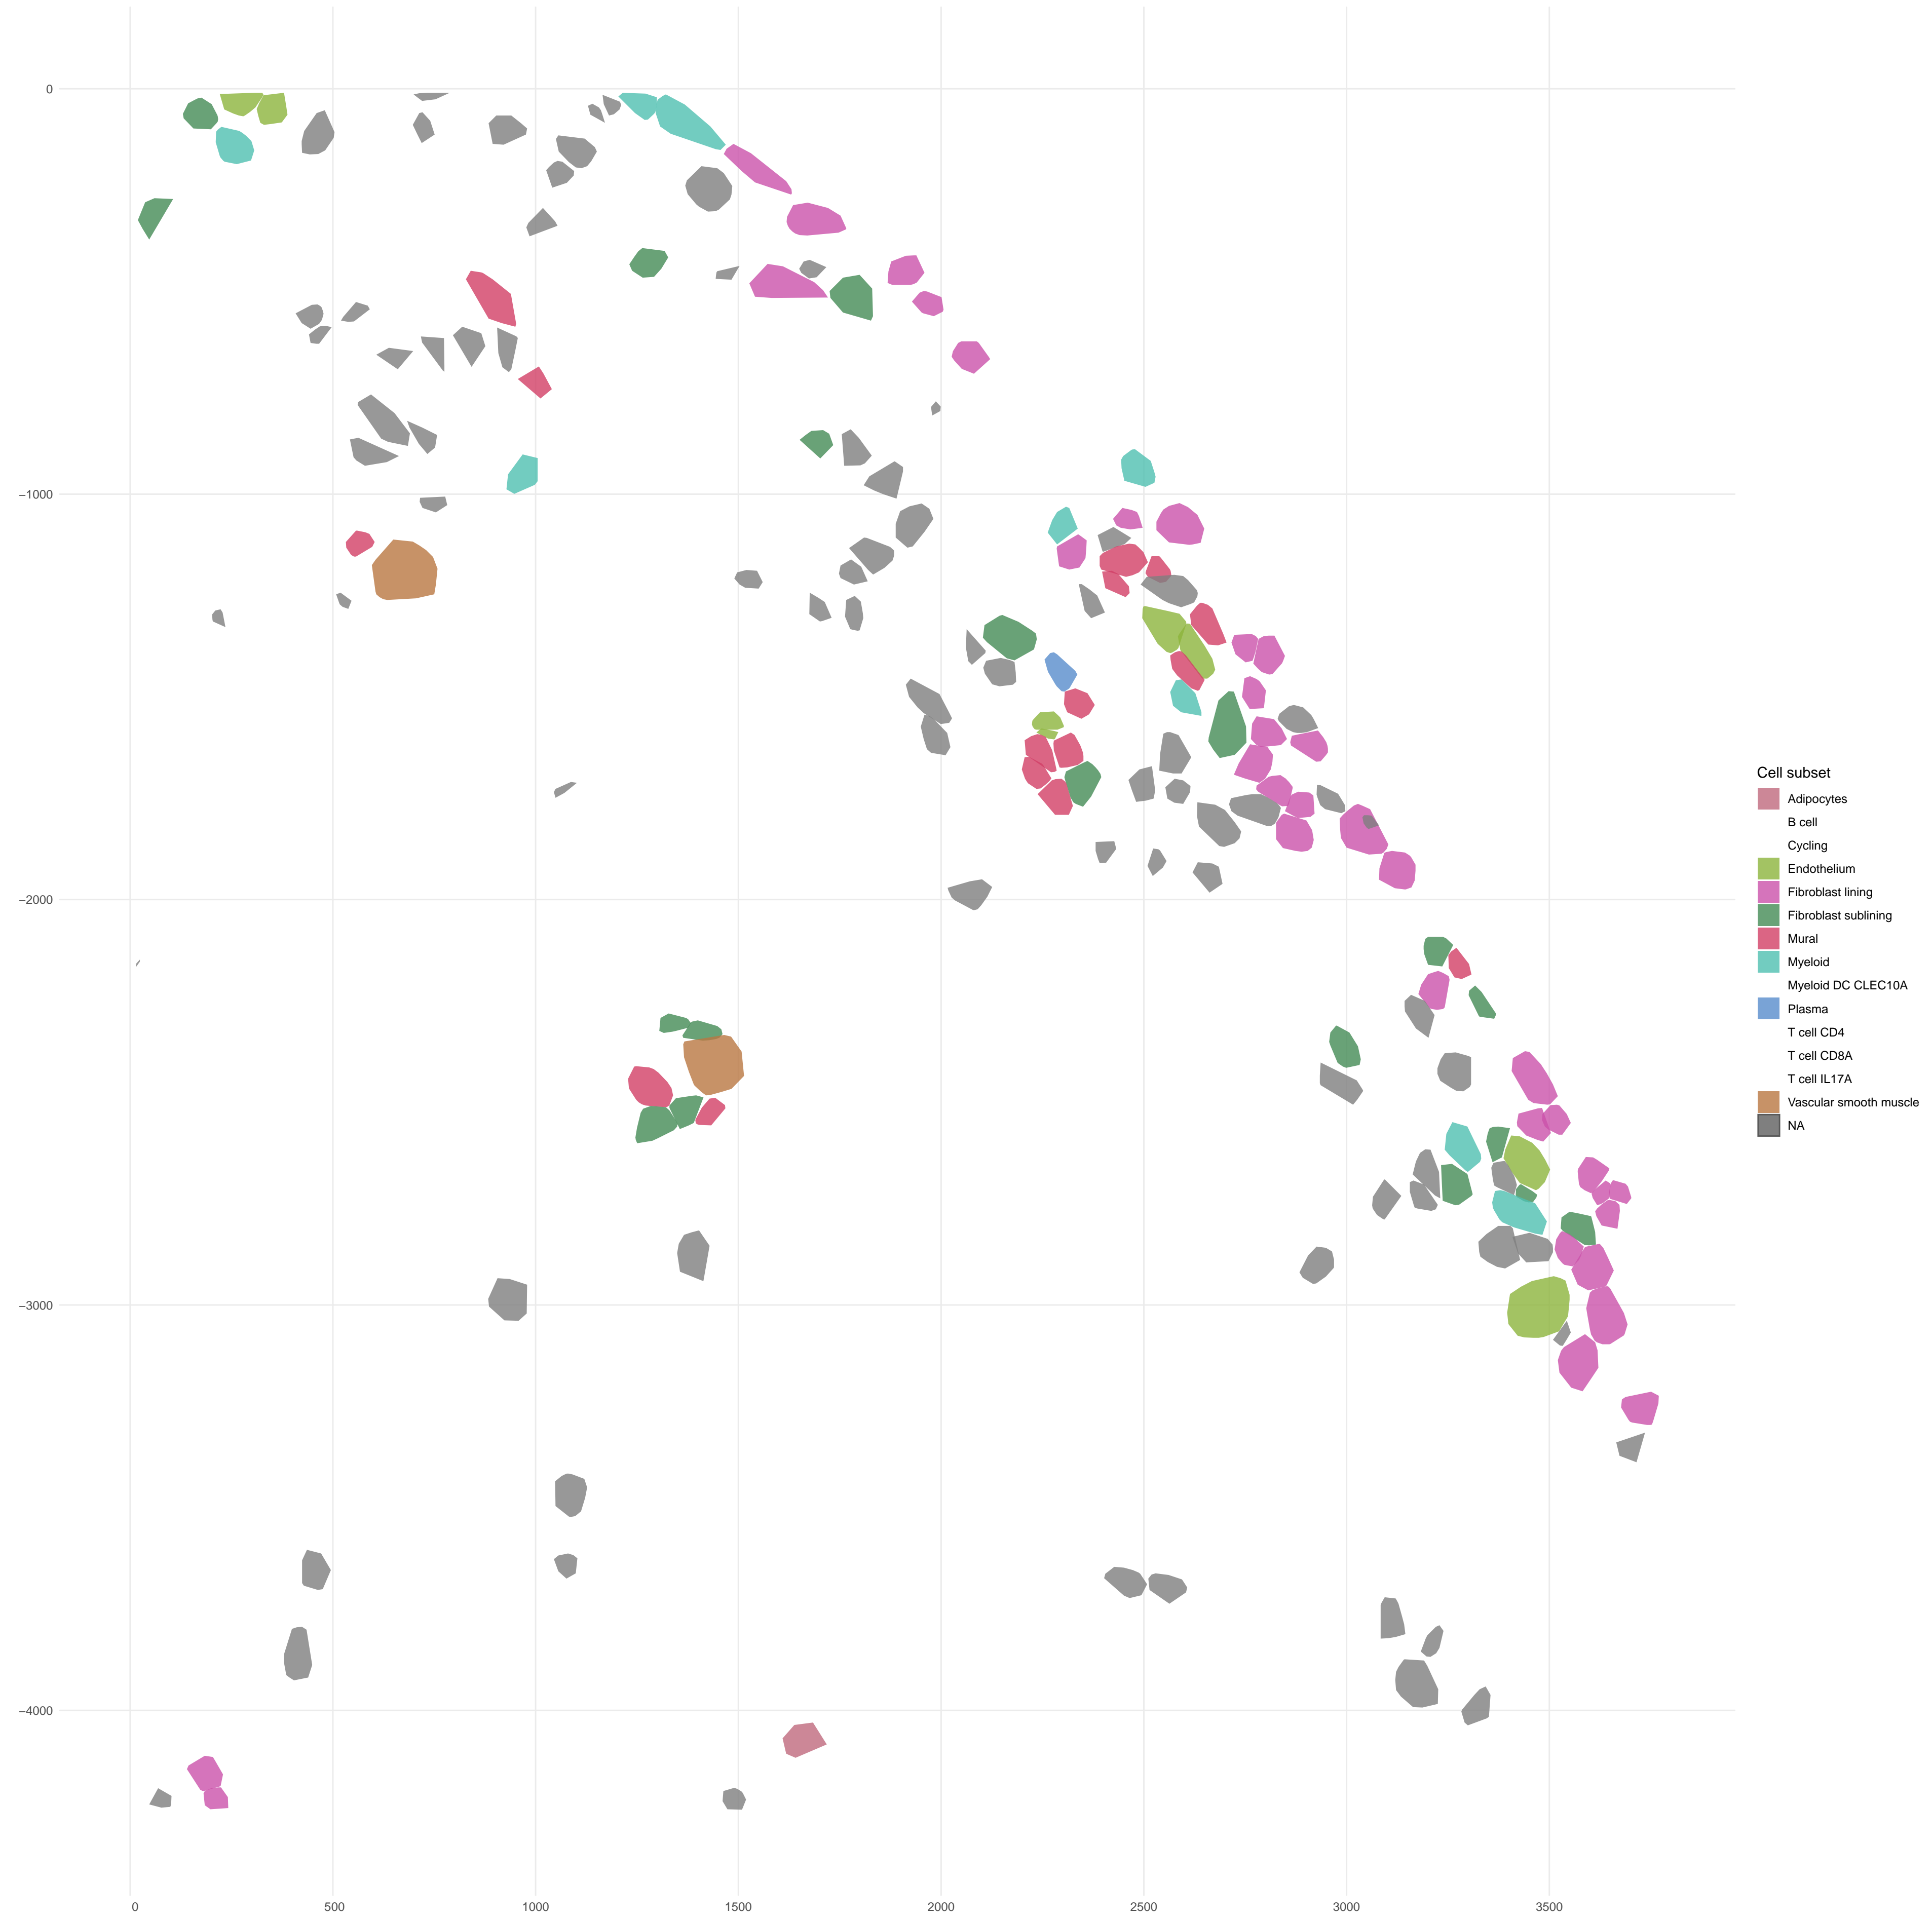



BX439 Post\_Treatment

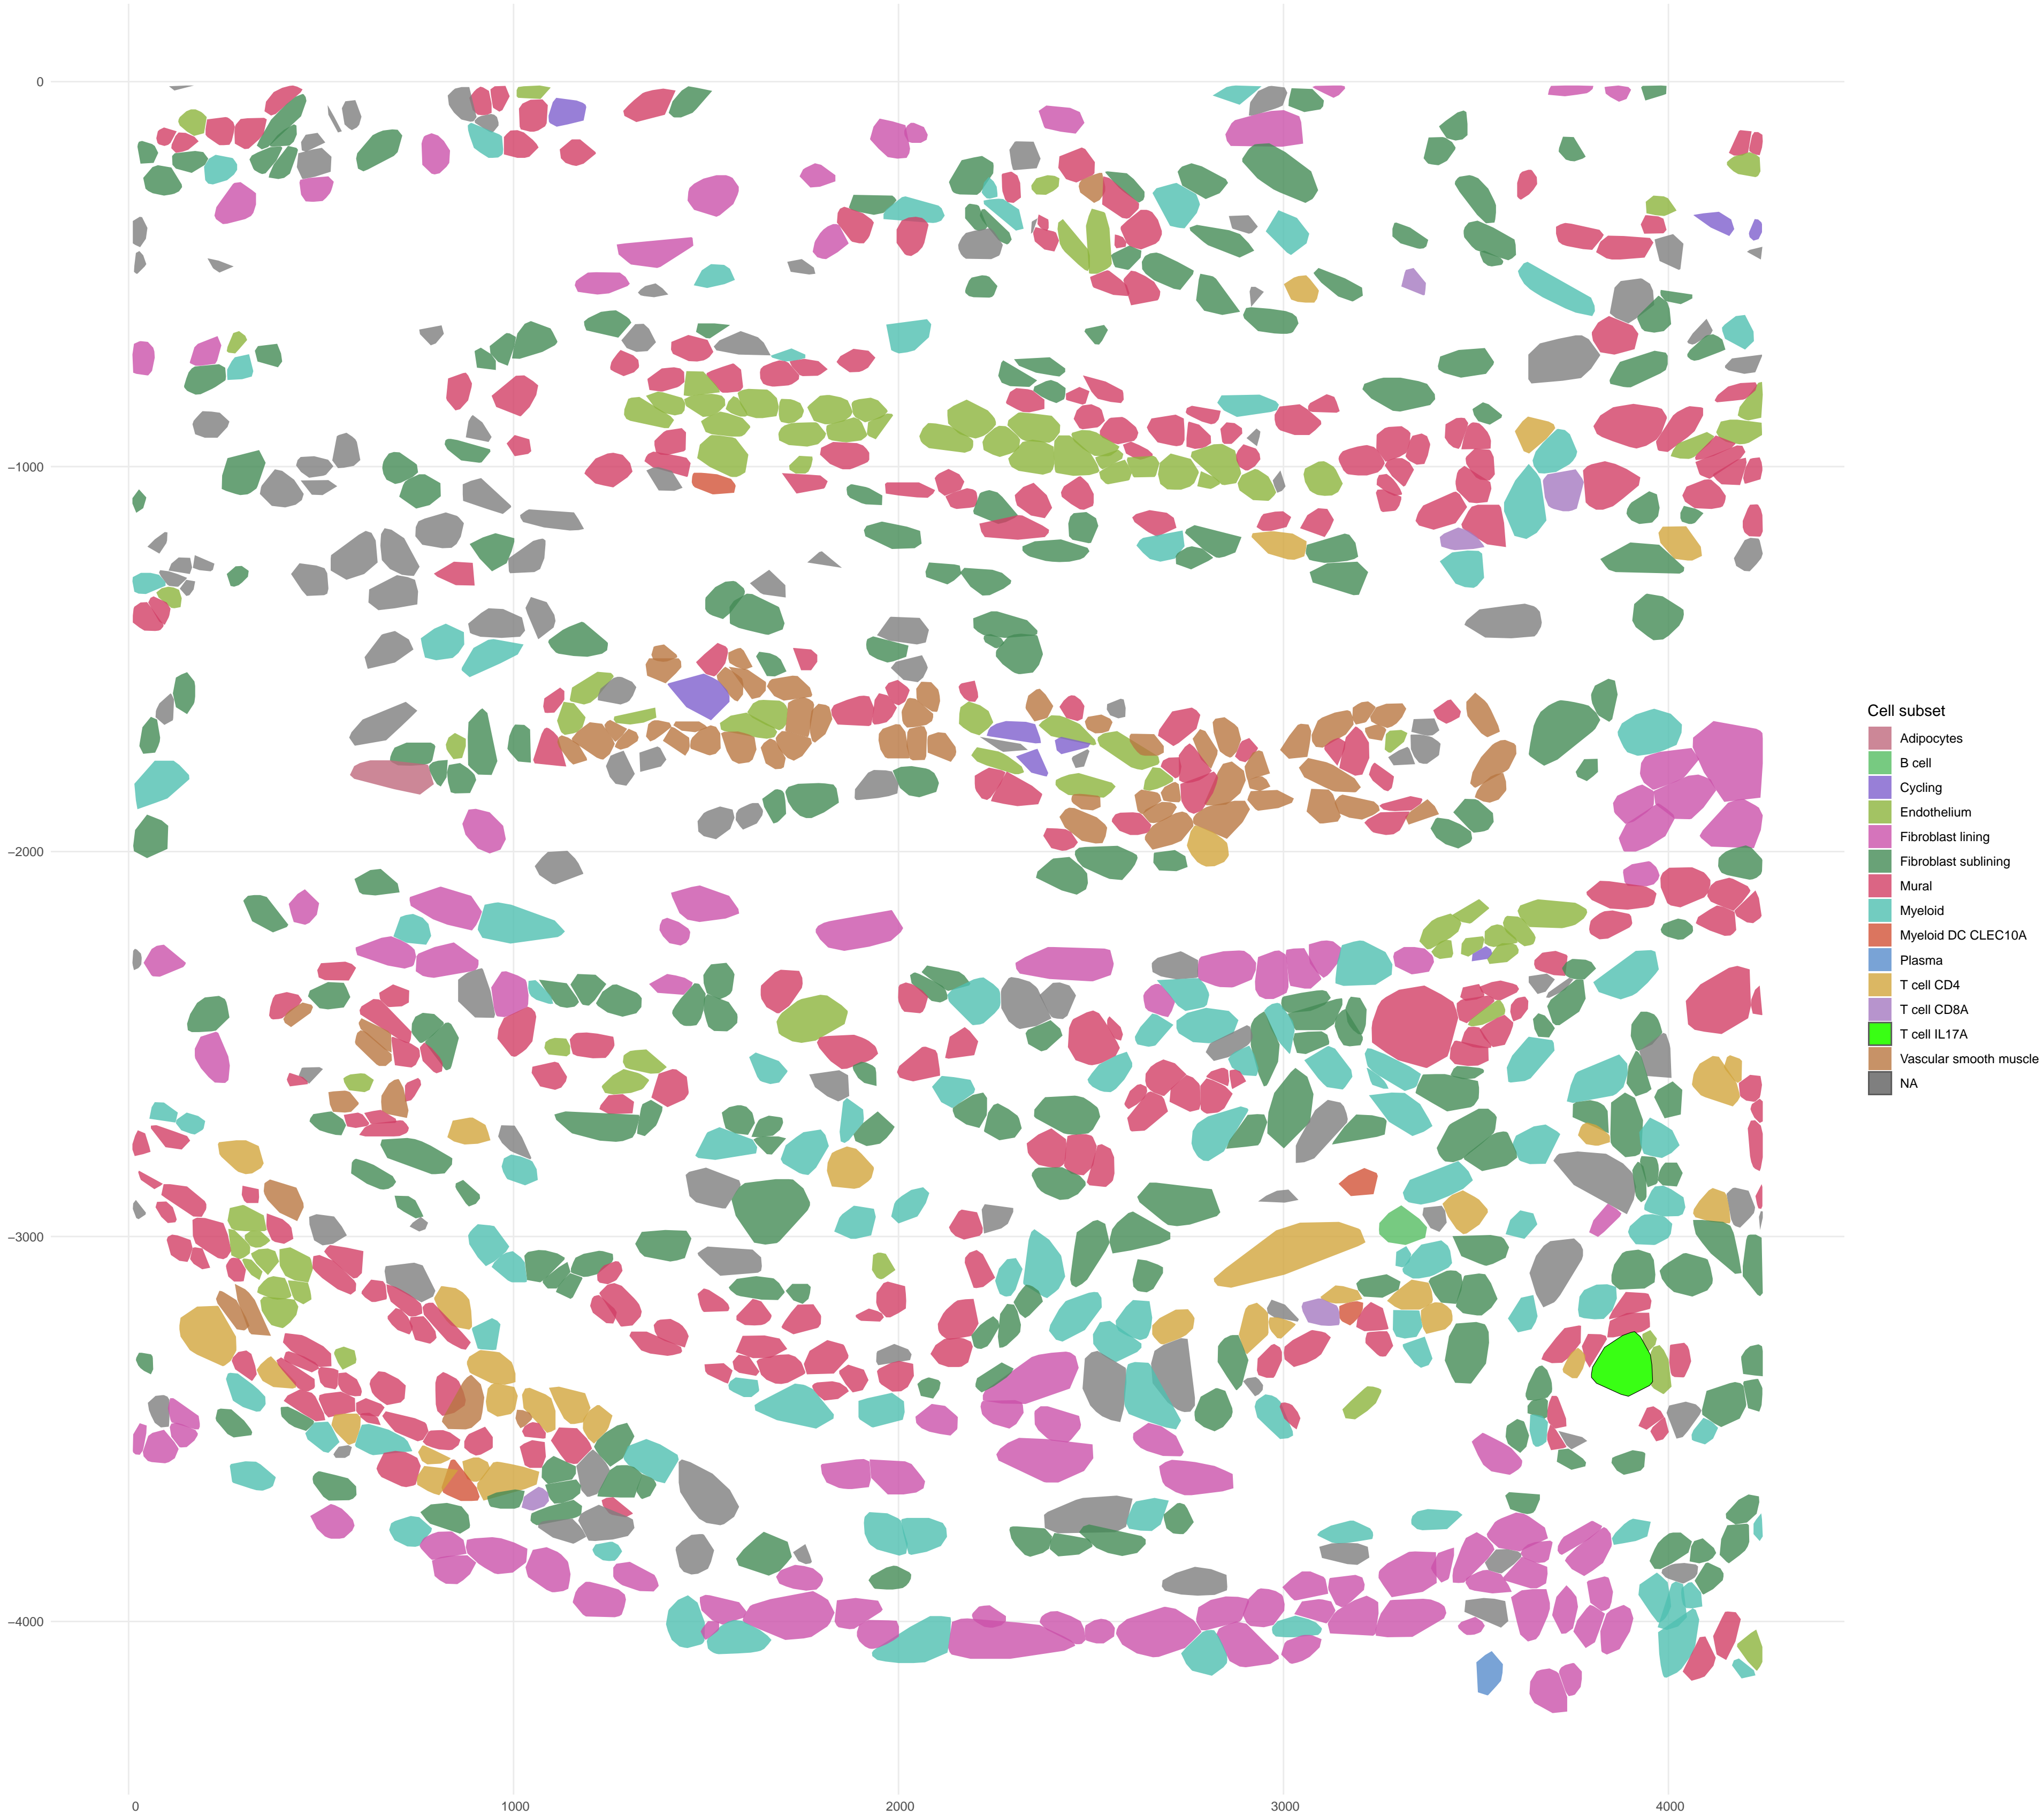

BX417 Baseline

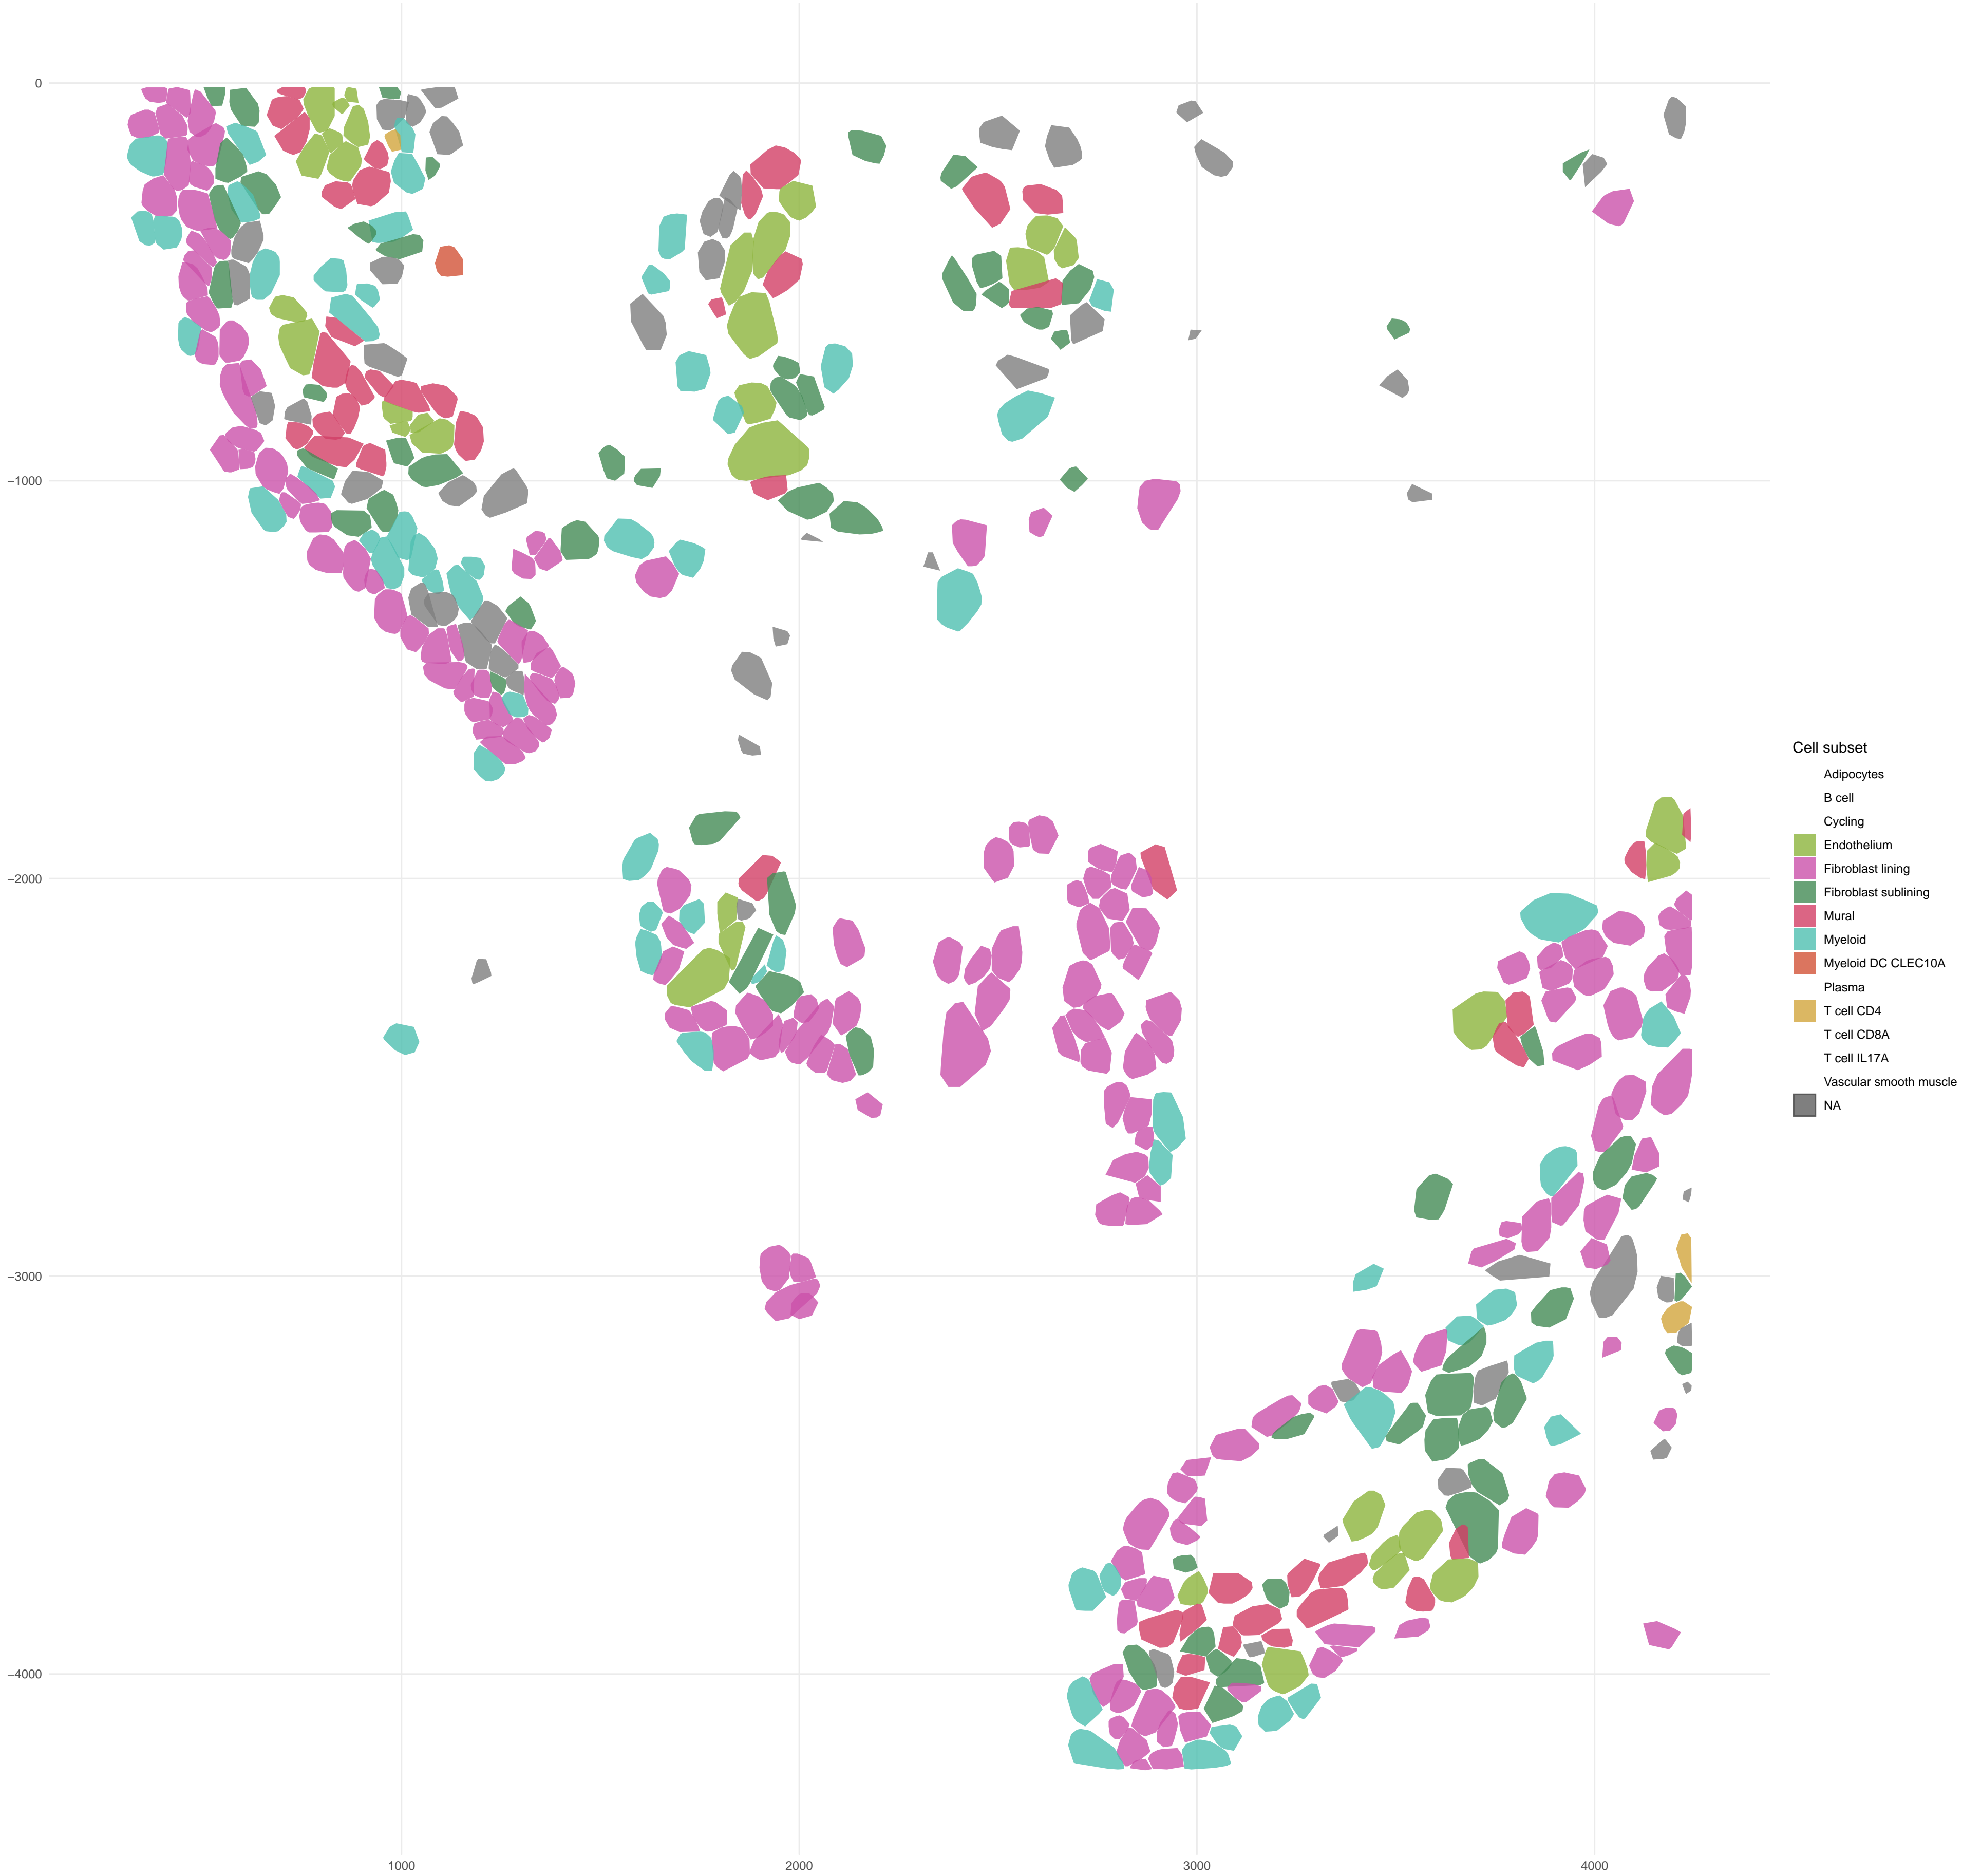

BX417 Baseline

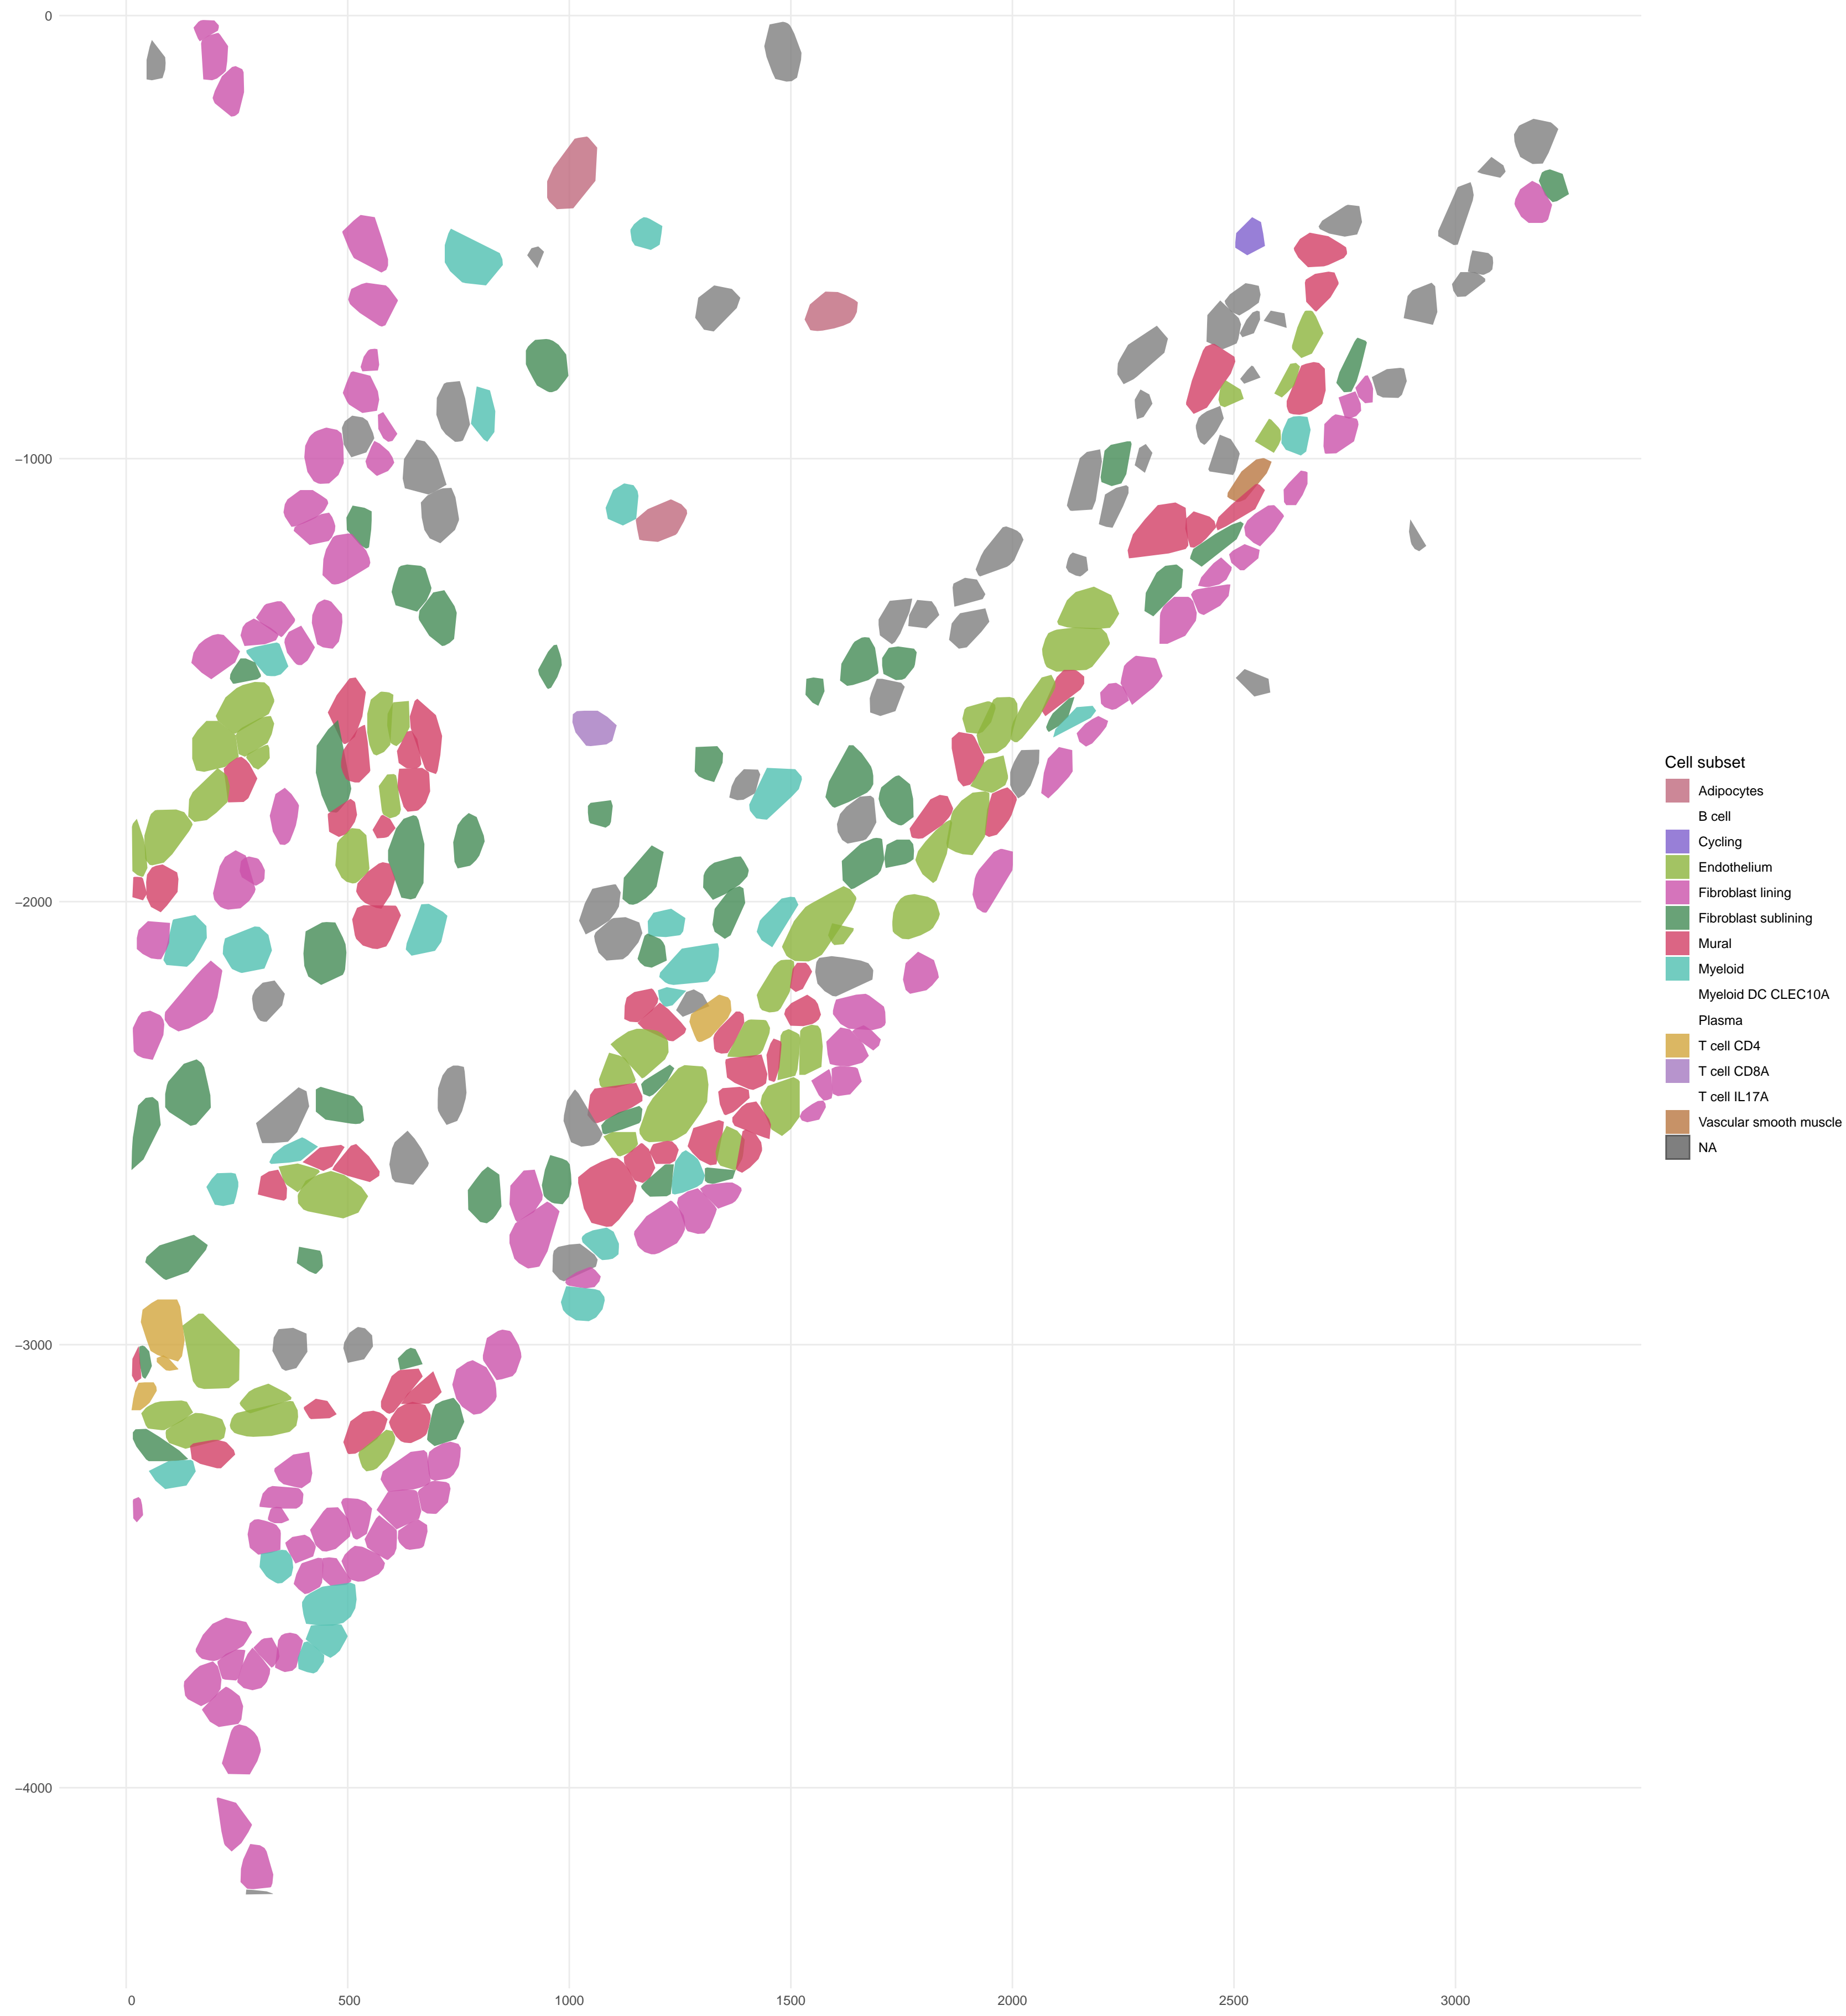



BX423 Baseline

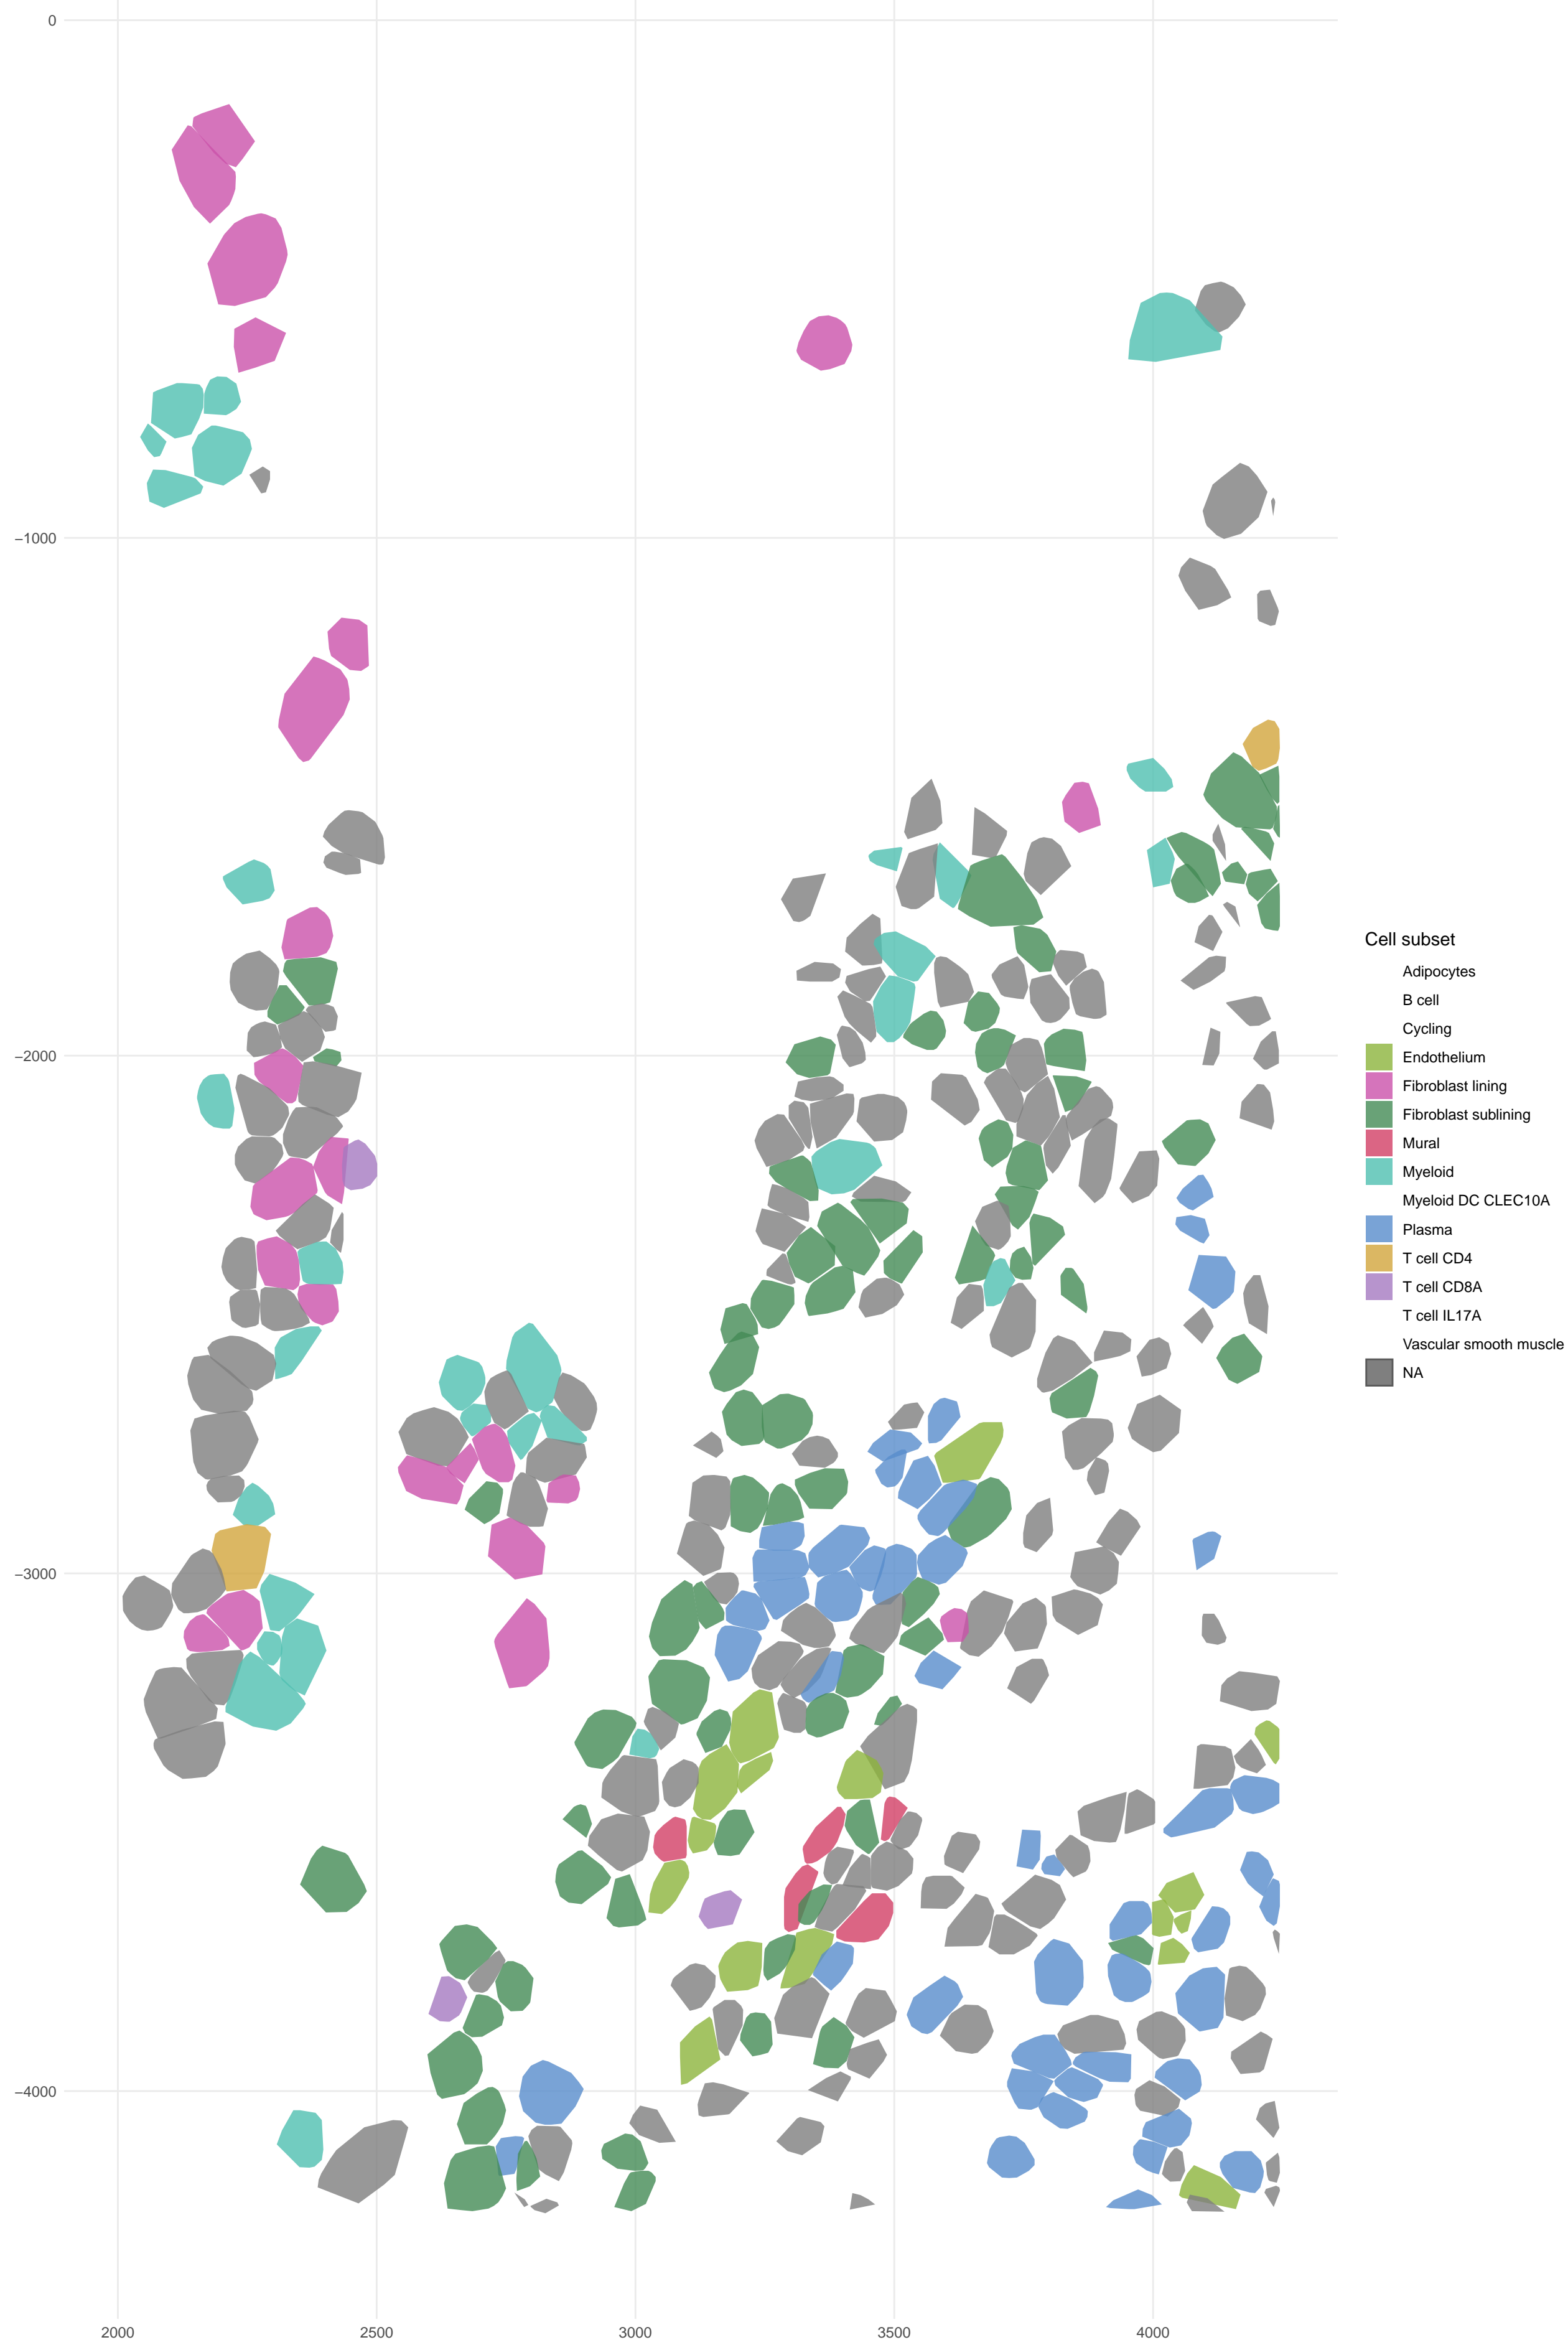

BX423 Baseline

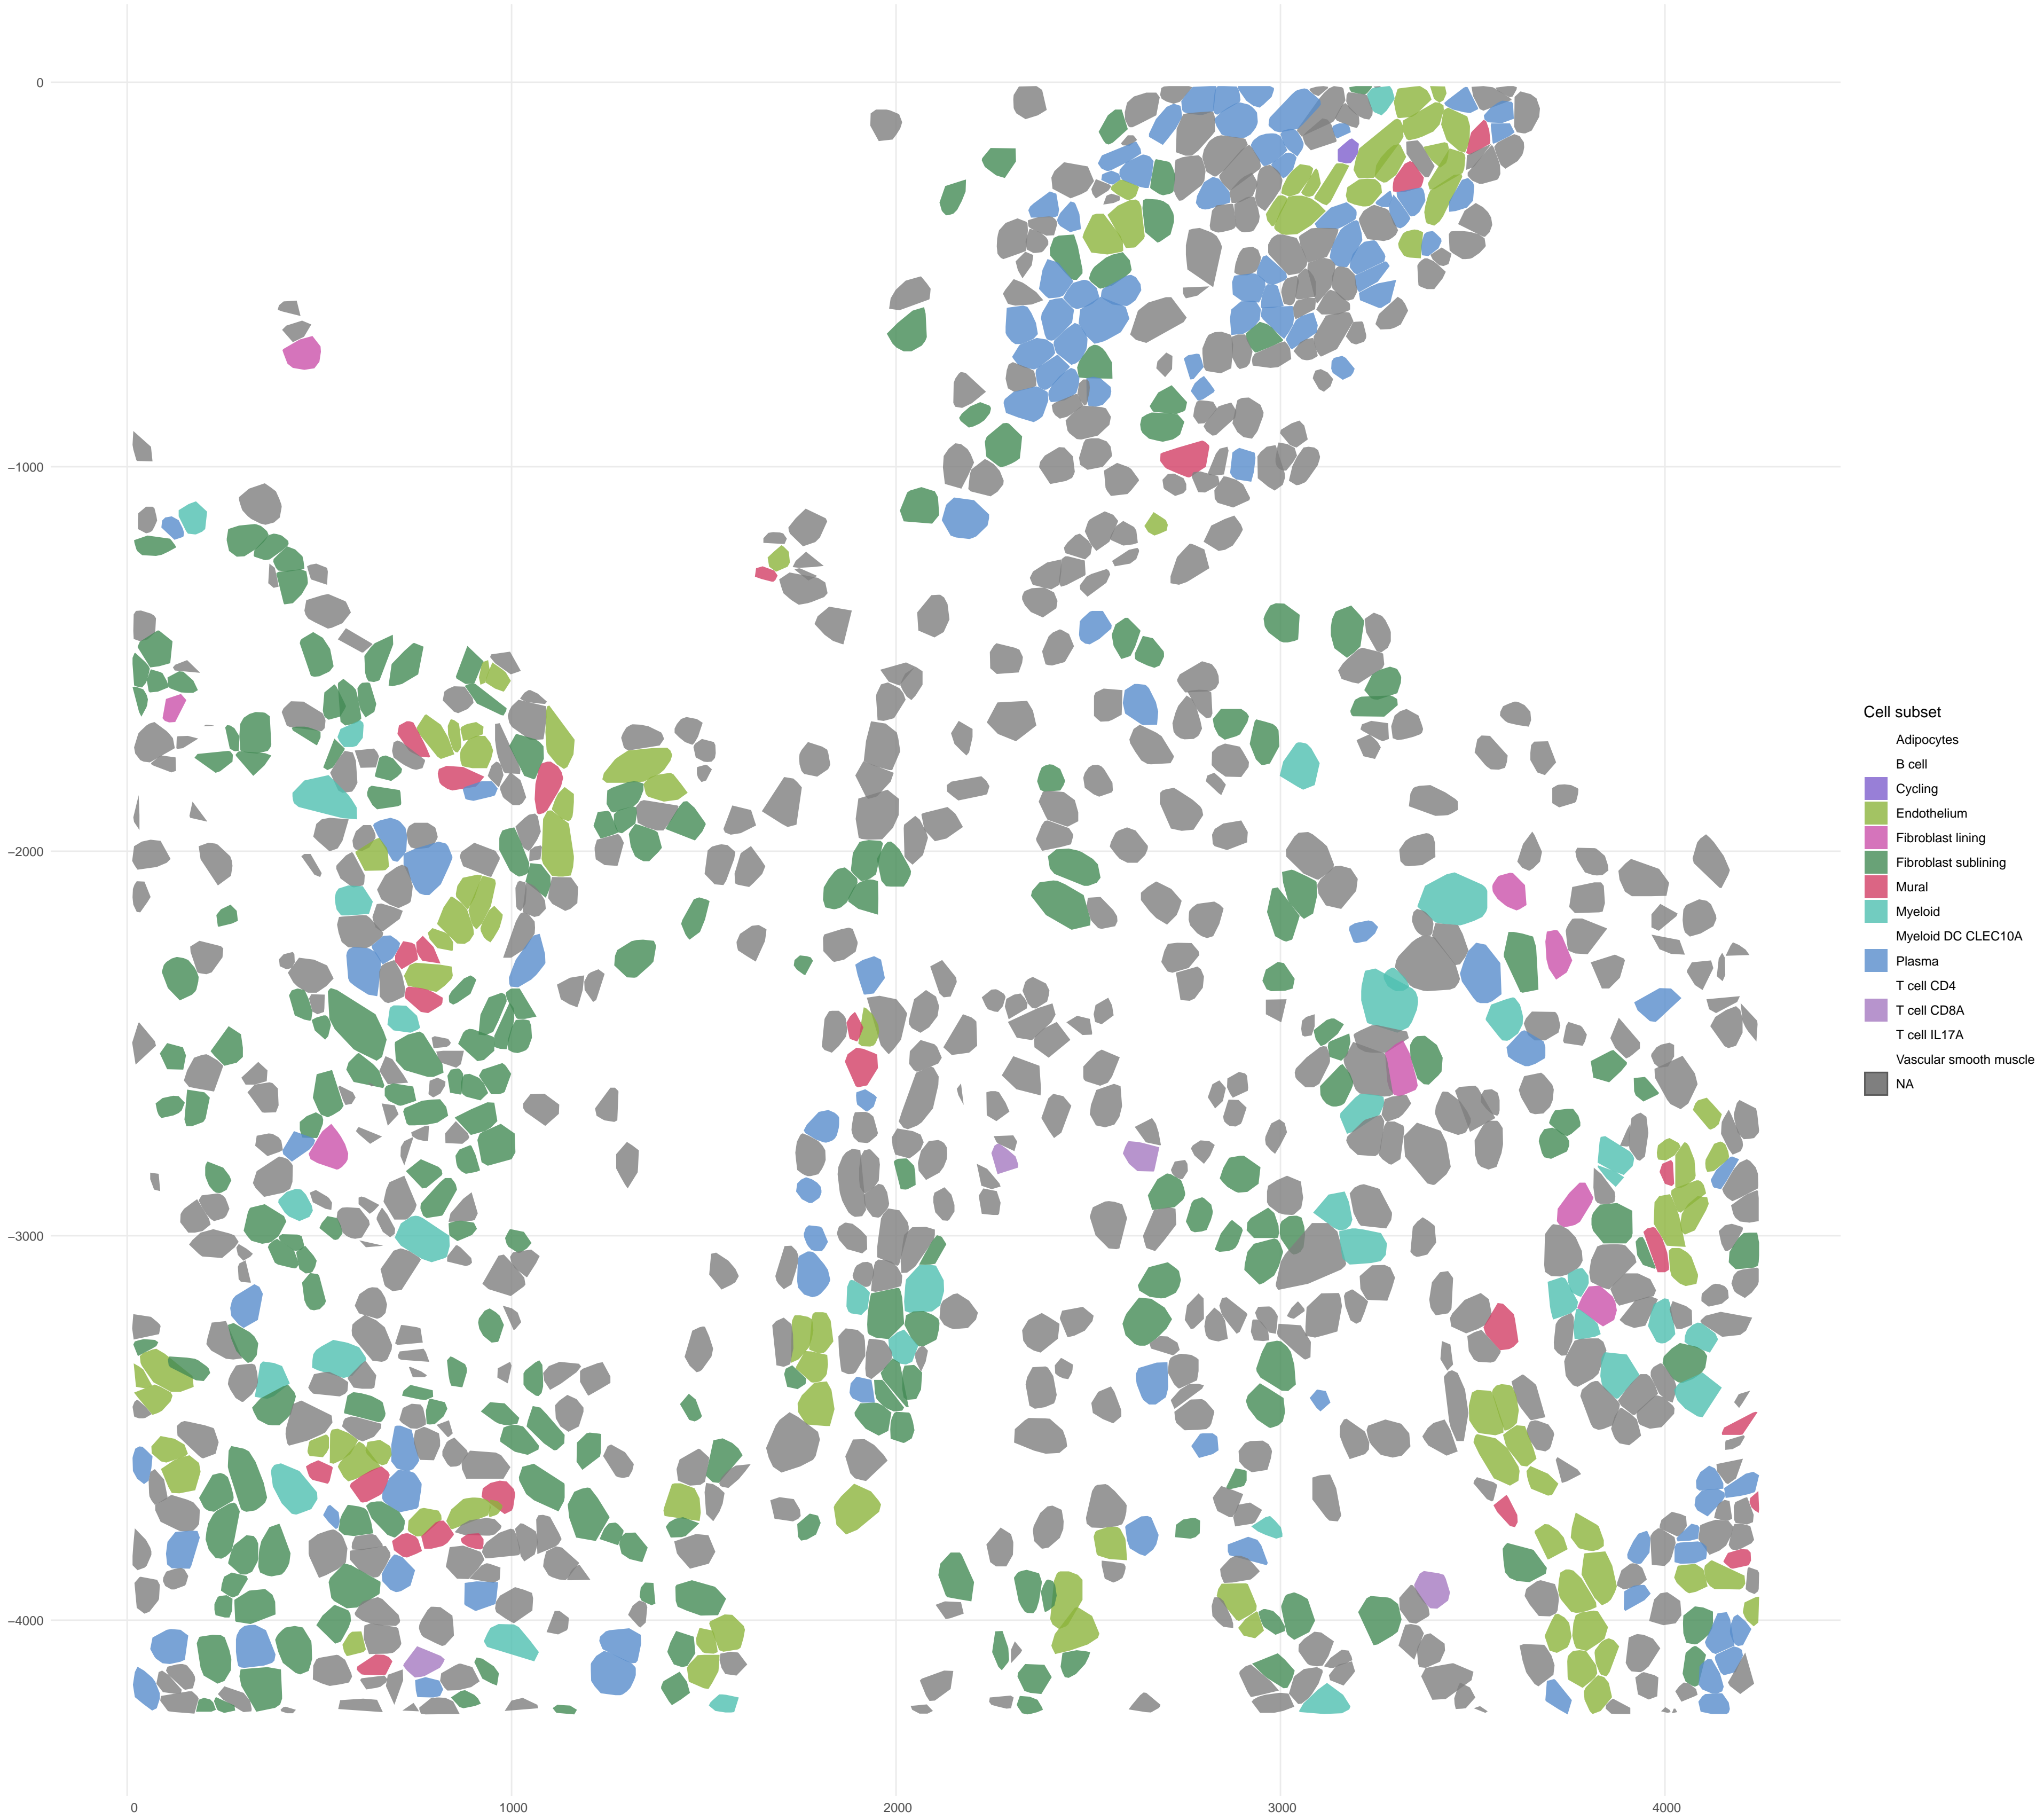

BX423 Baseline

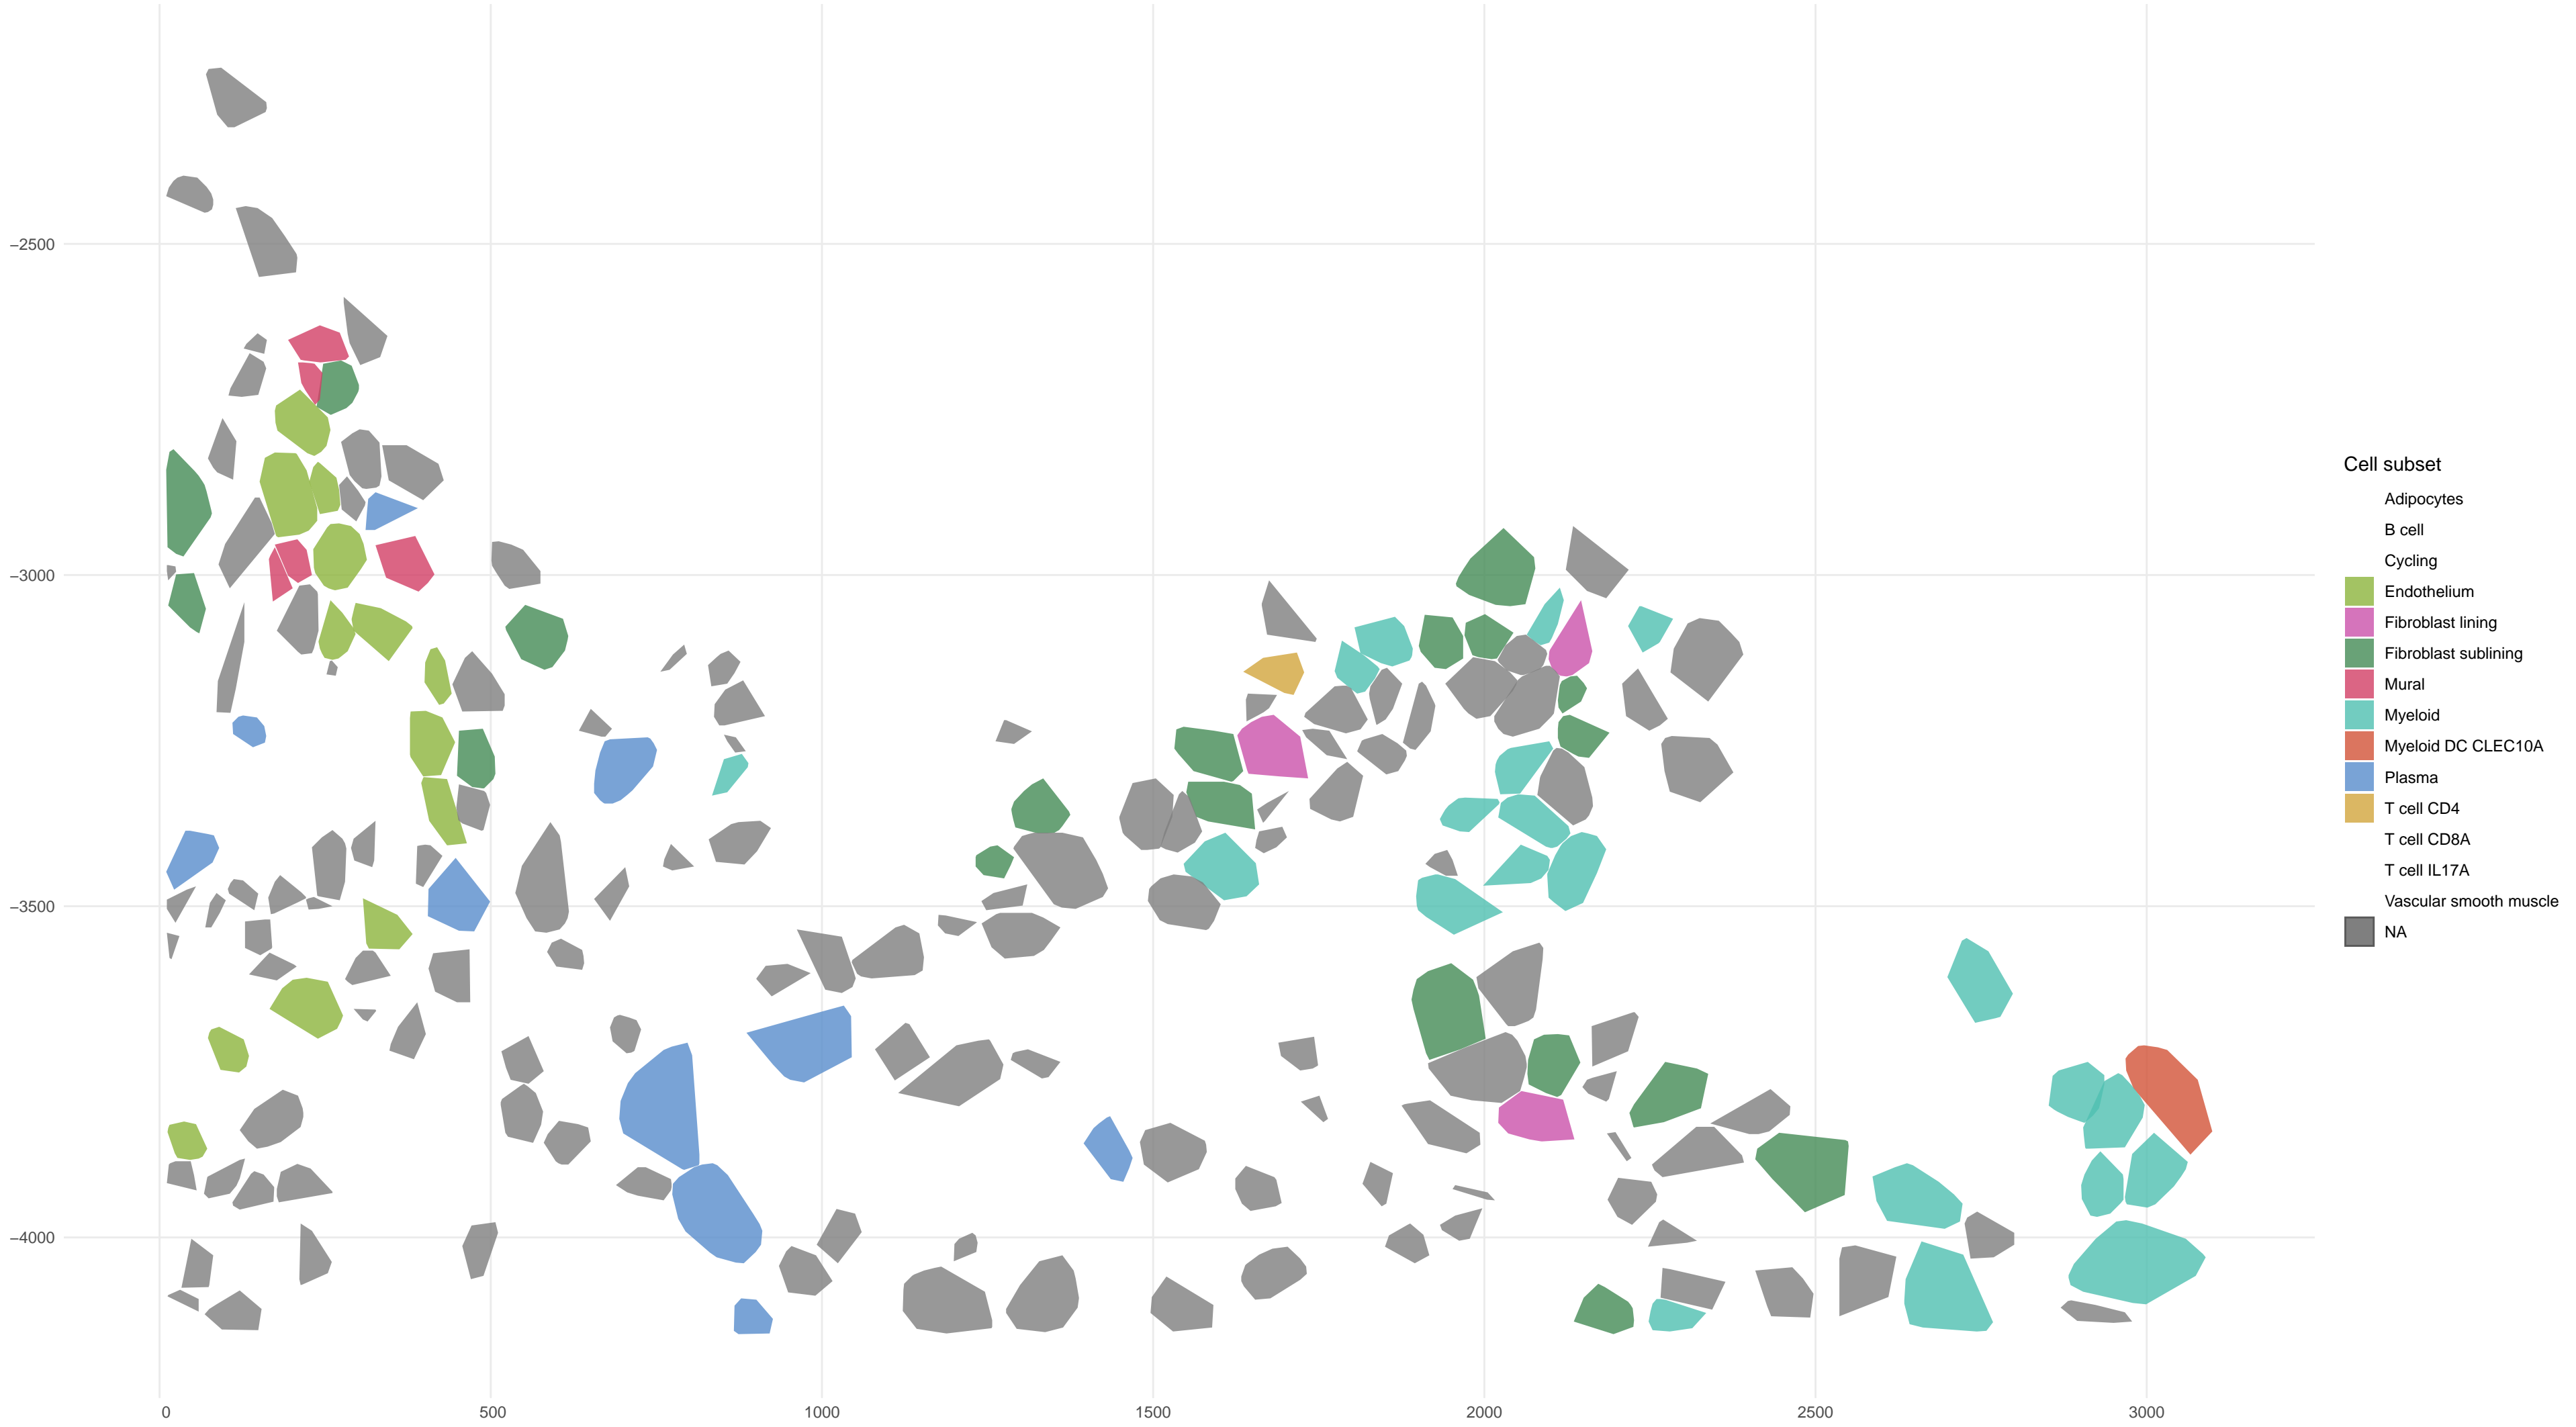



BX423 Baseline

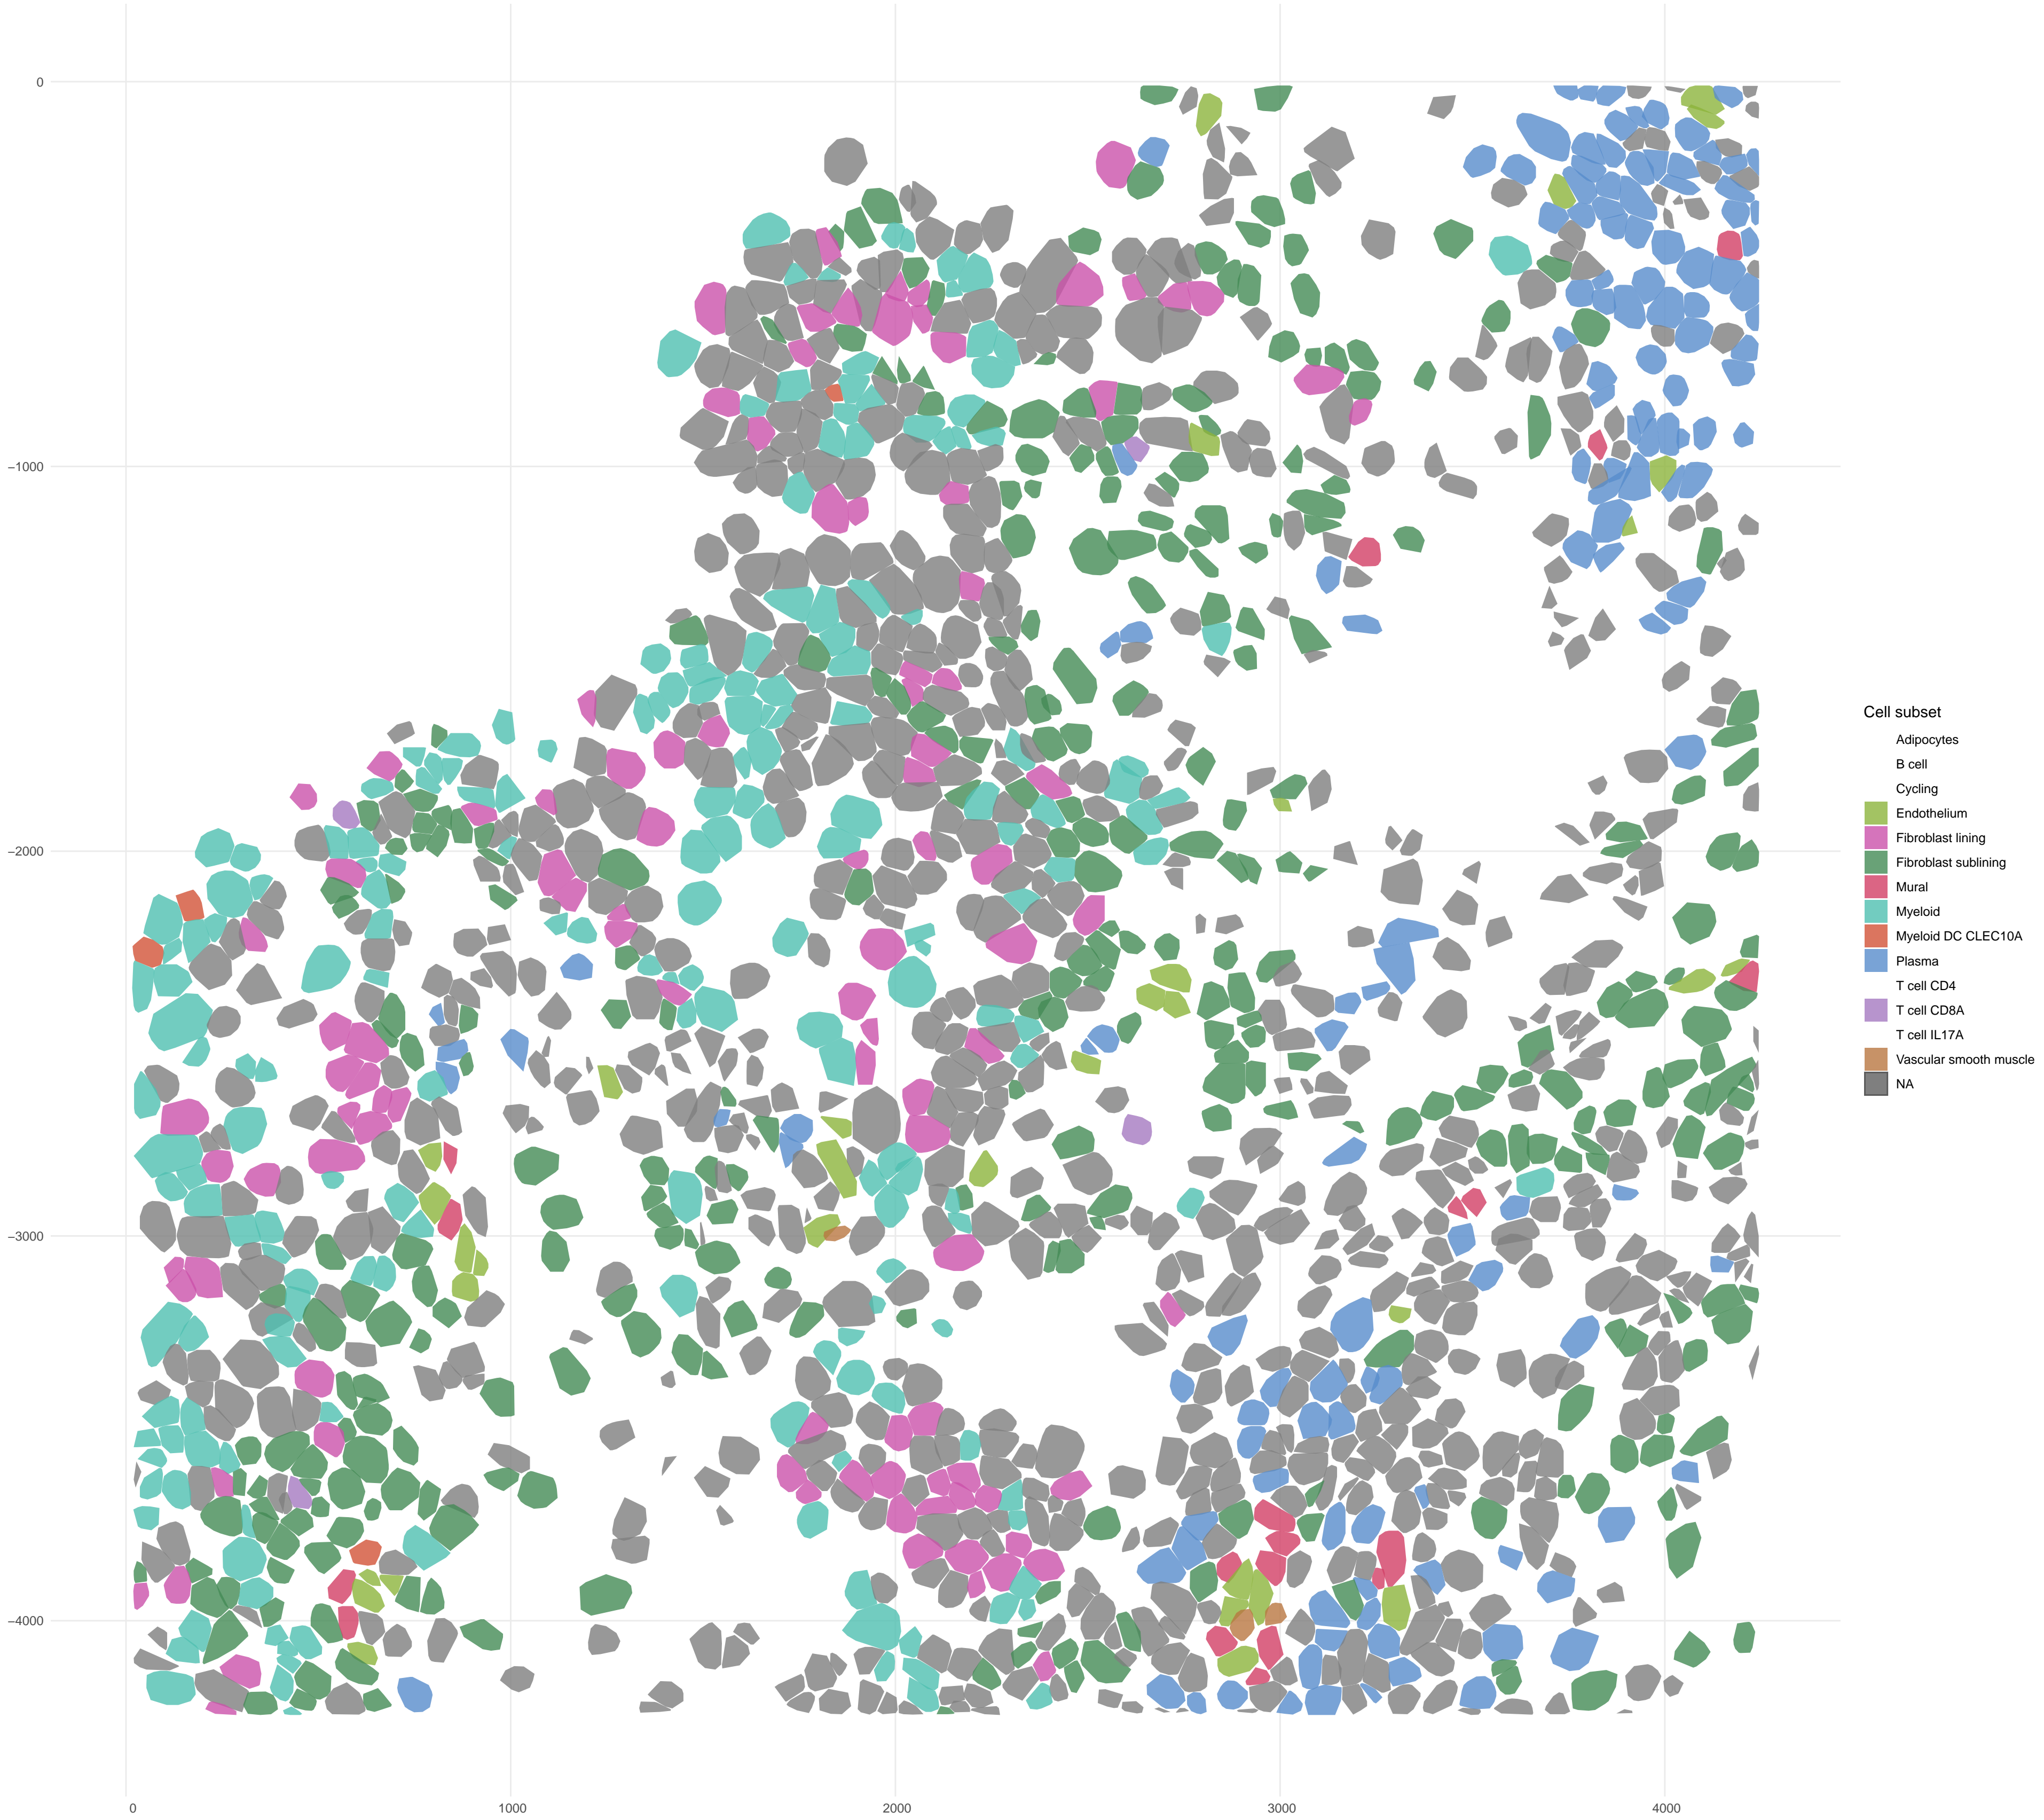

BX441 Post\_Treatment

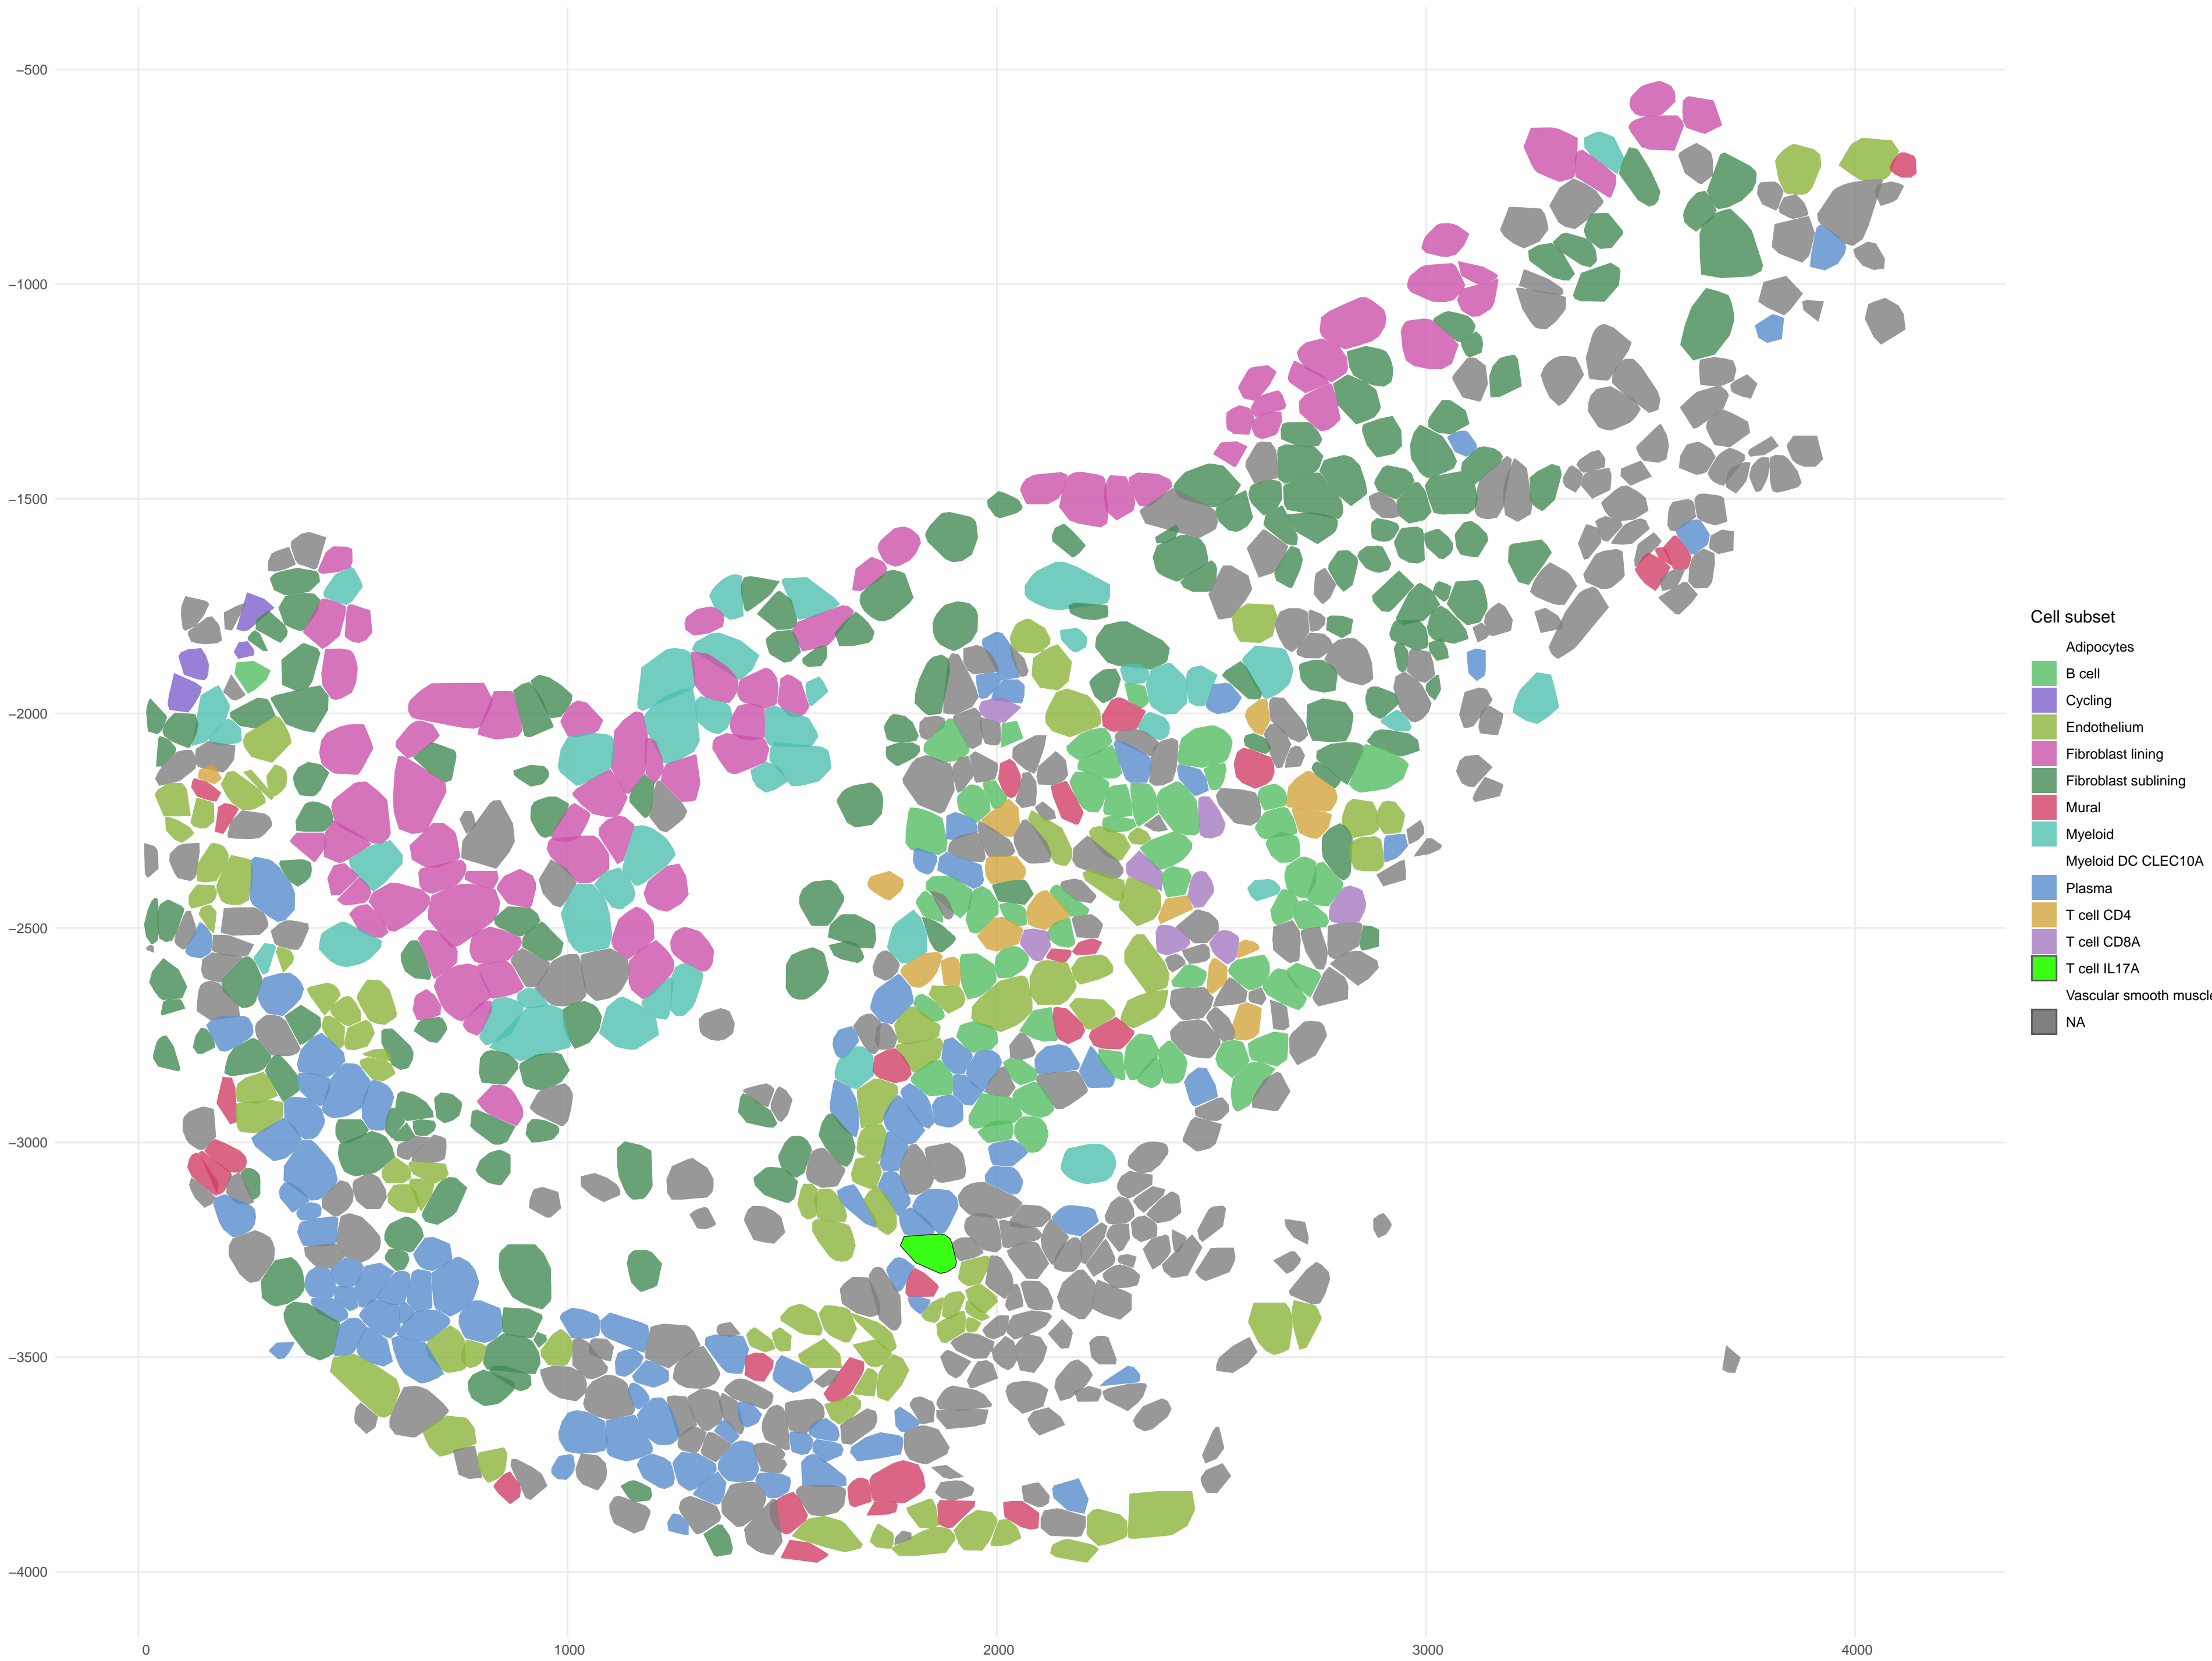

BX427 Baseline

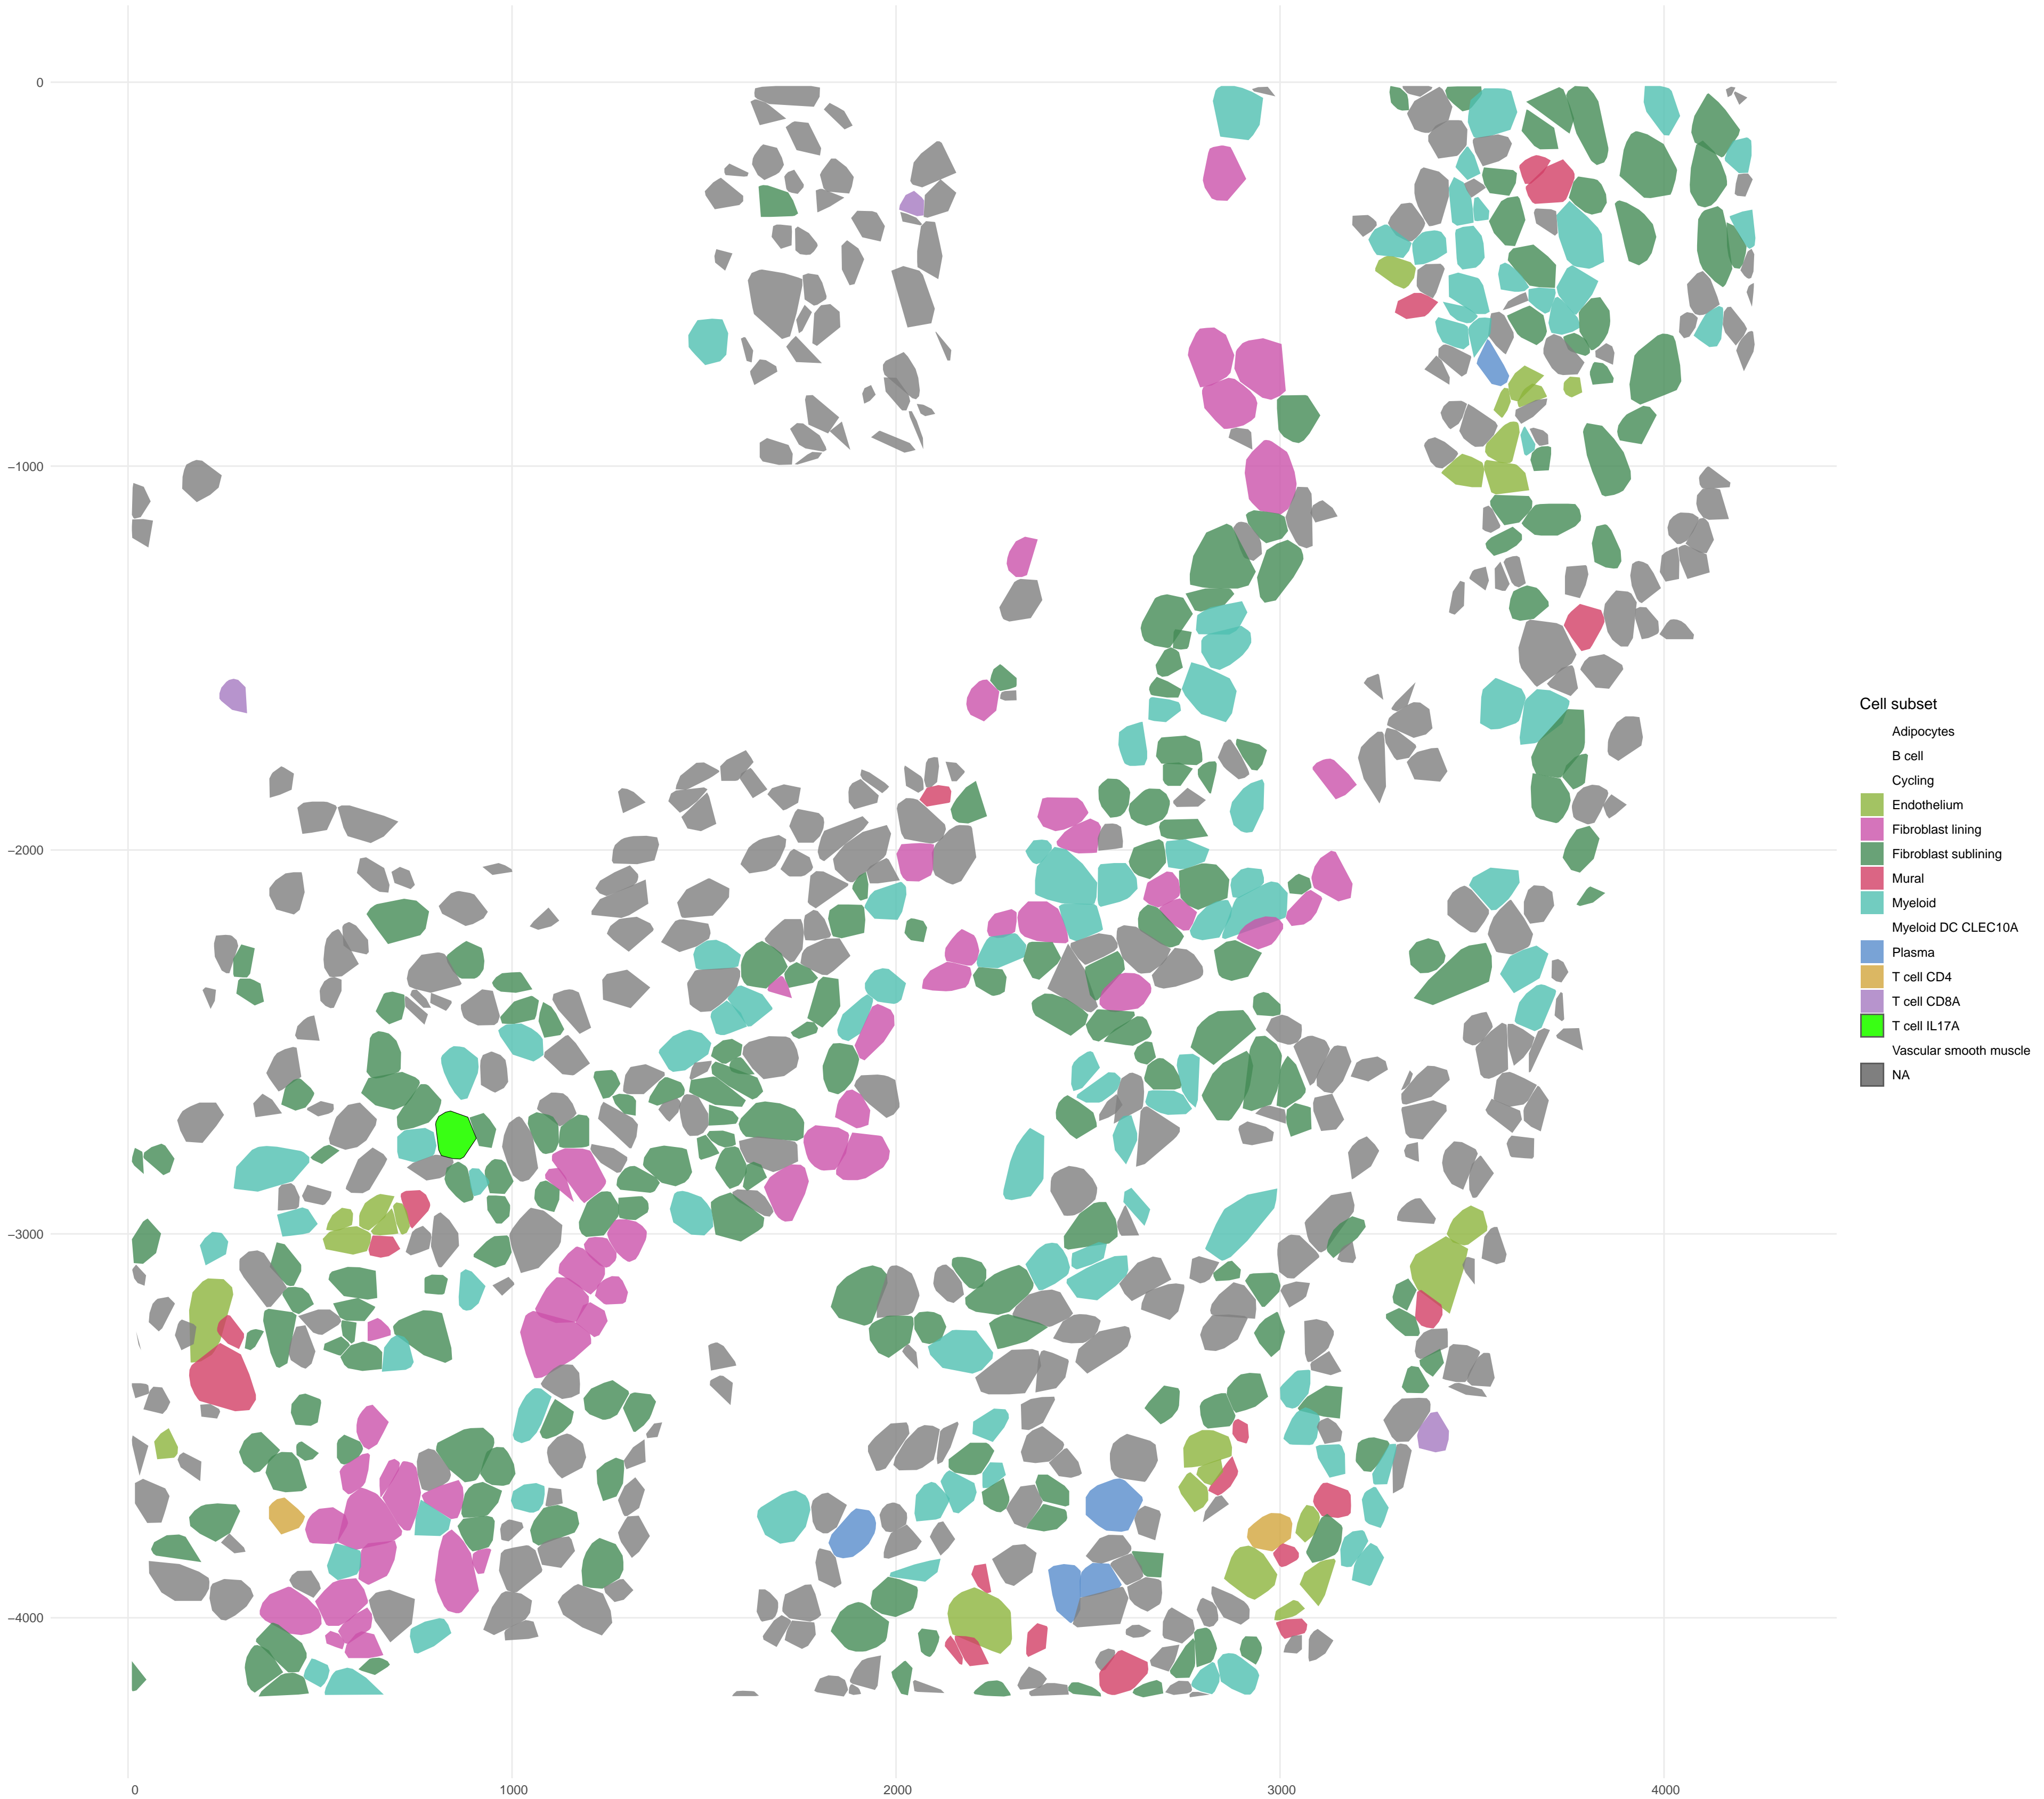



BX423 Baseline

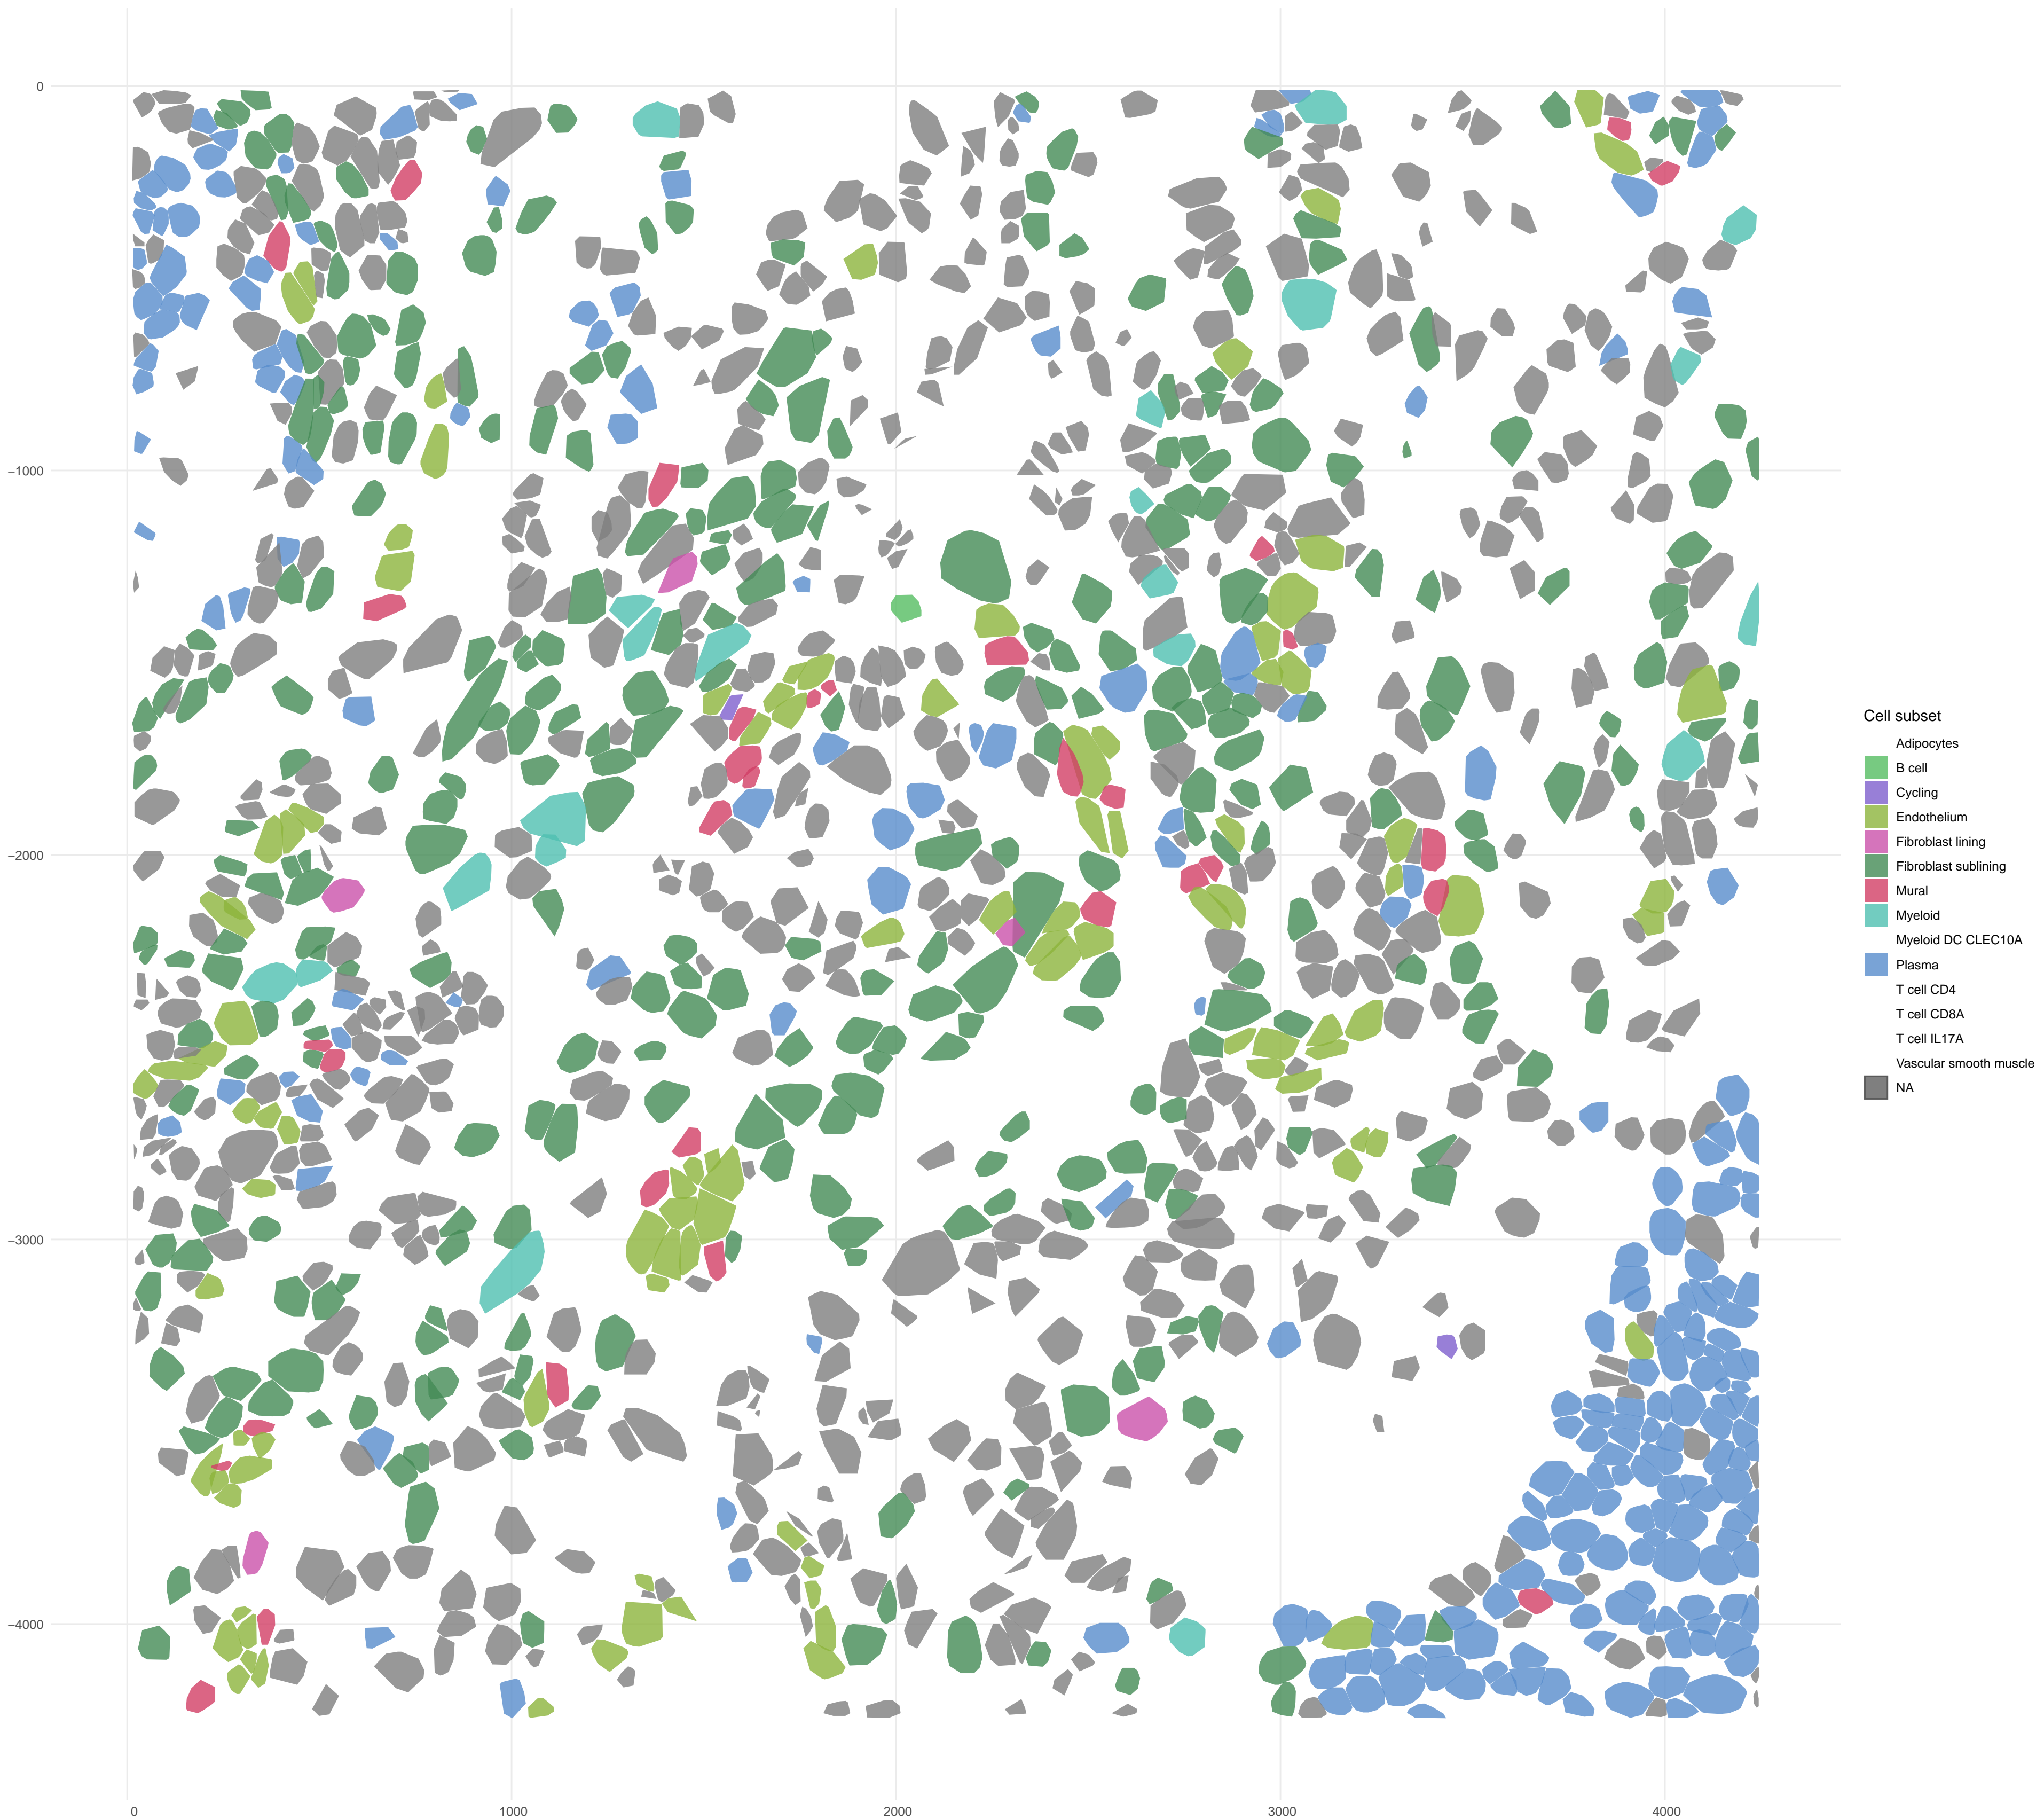

BX423 Baseline

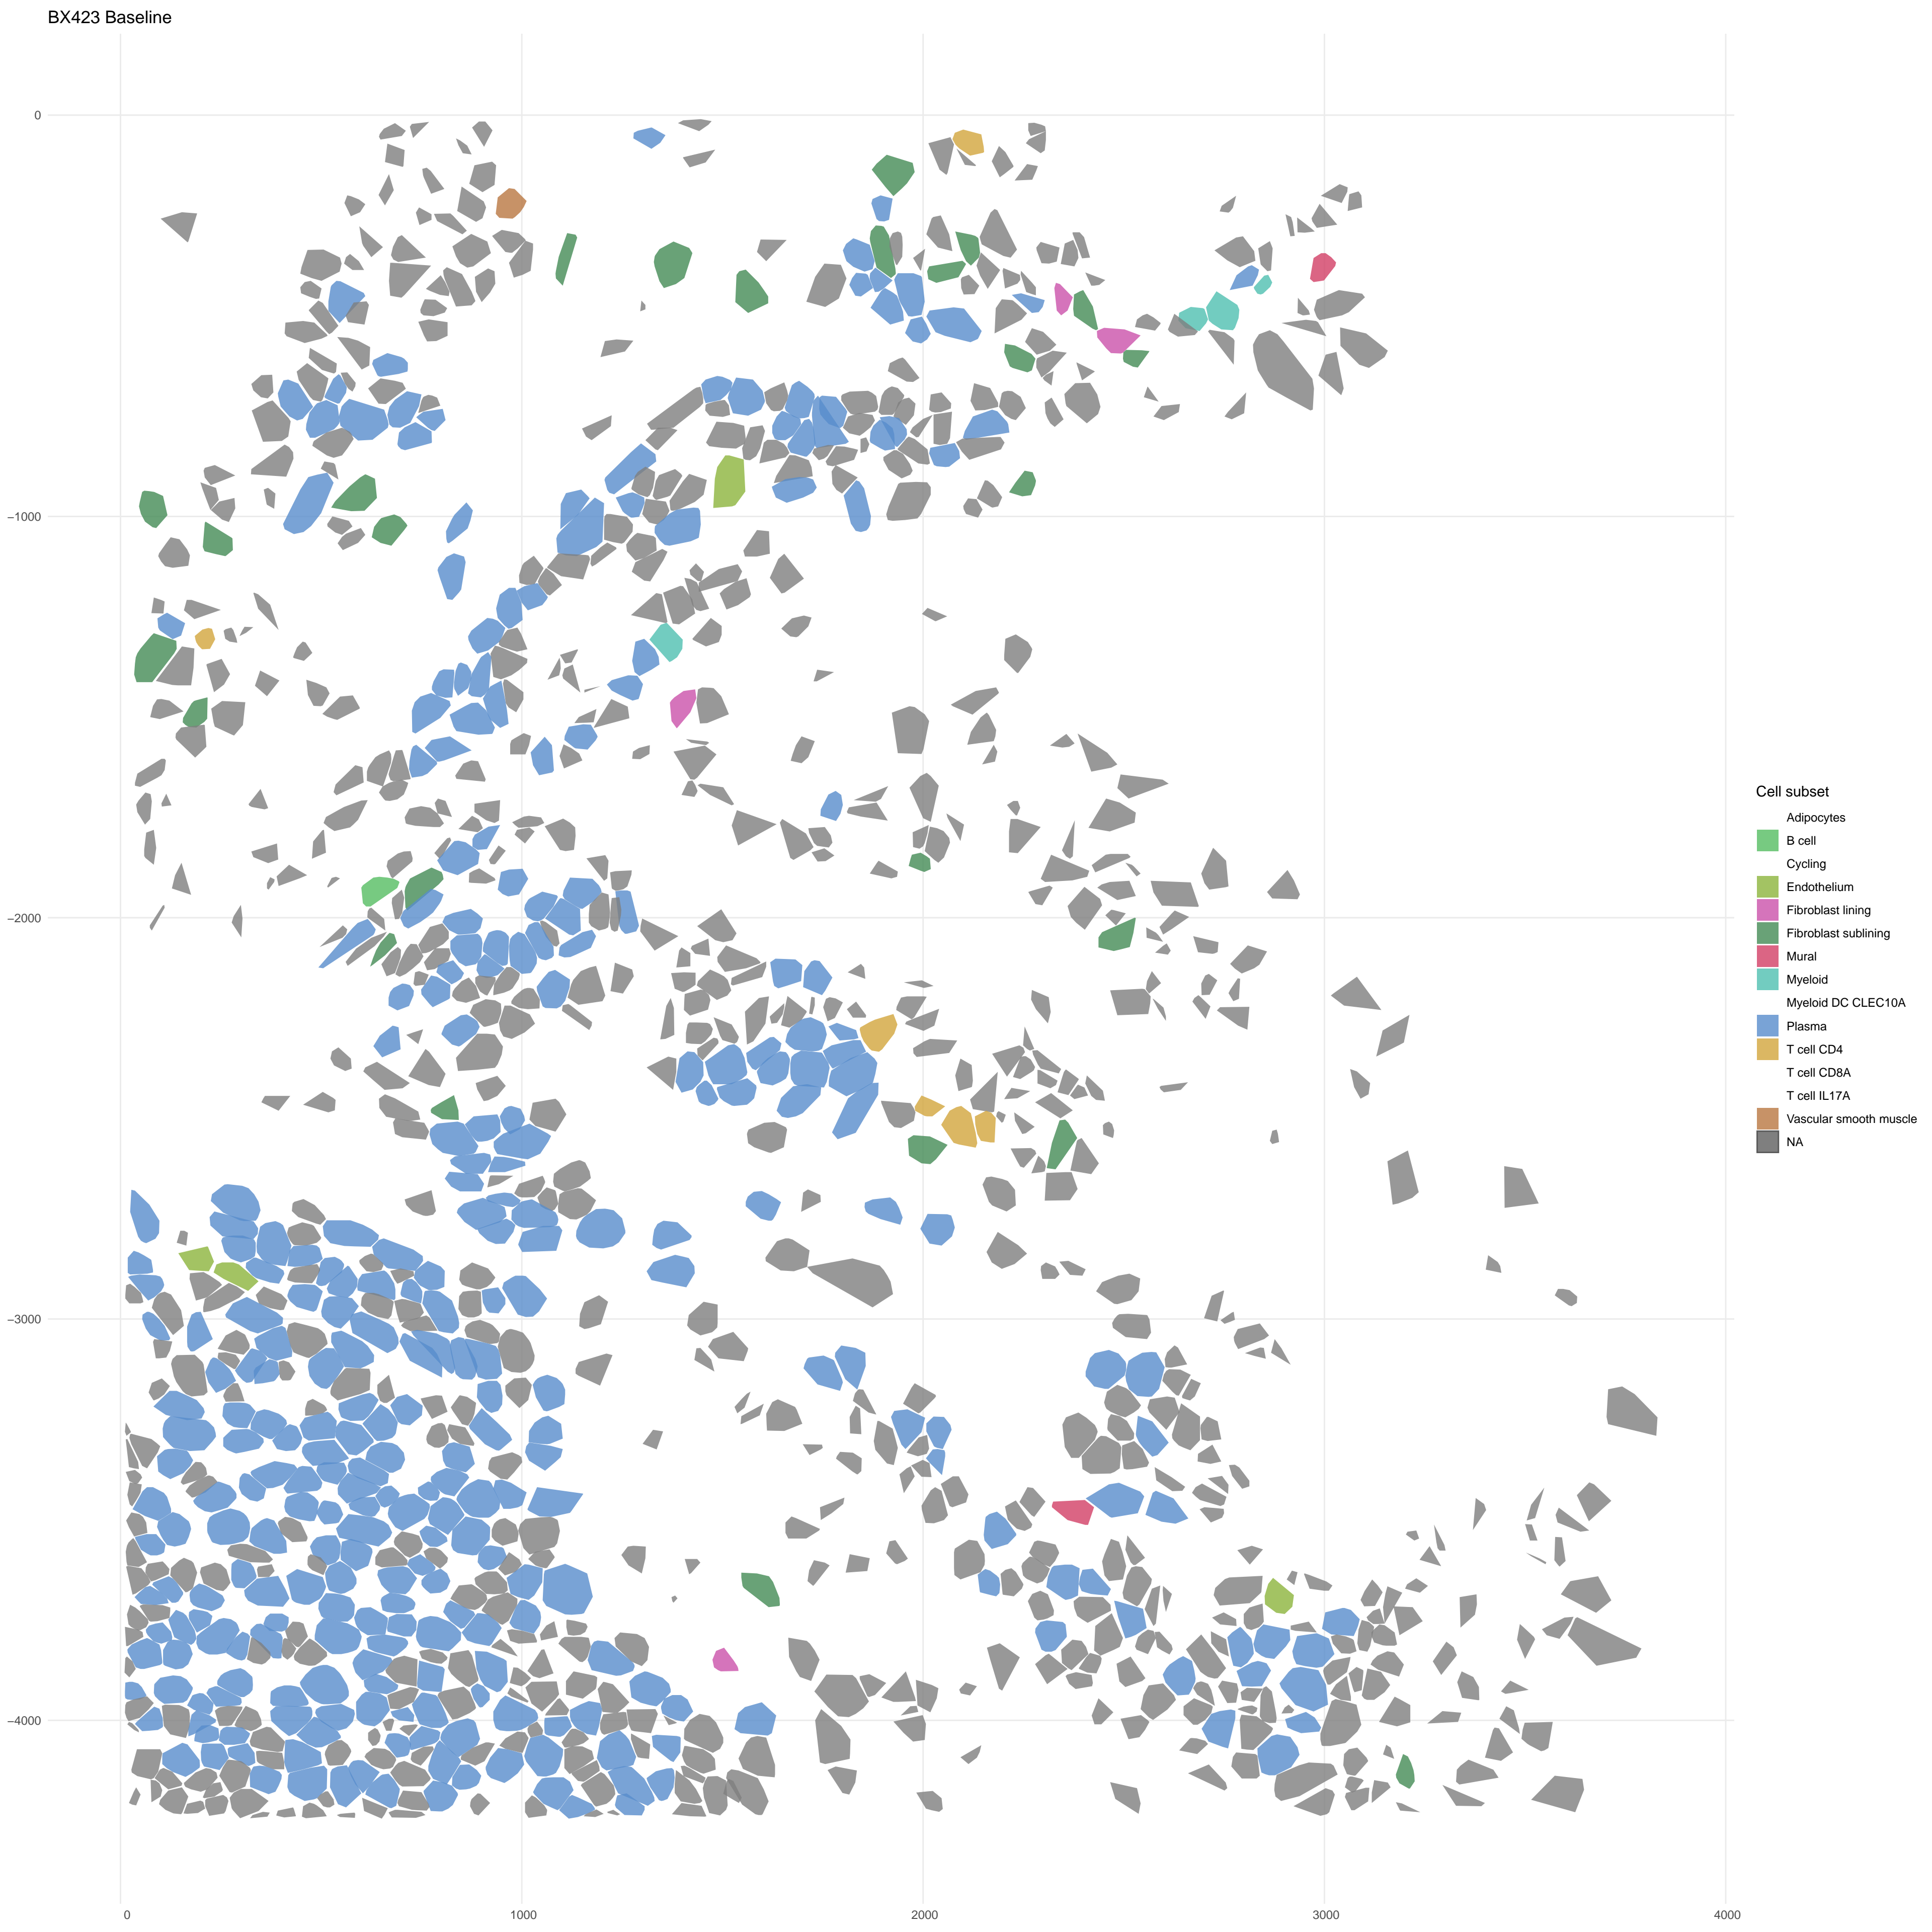



BX423 Baseline

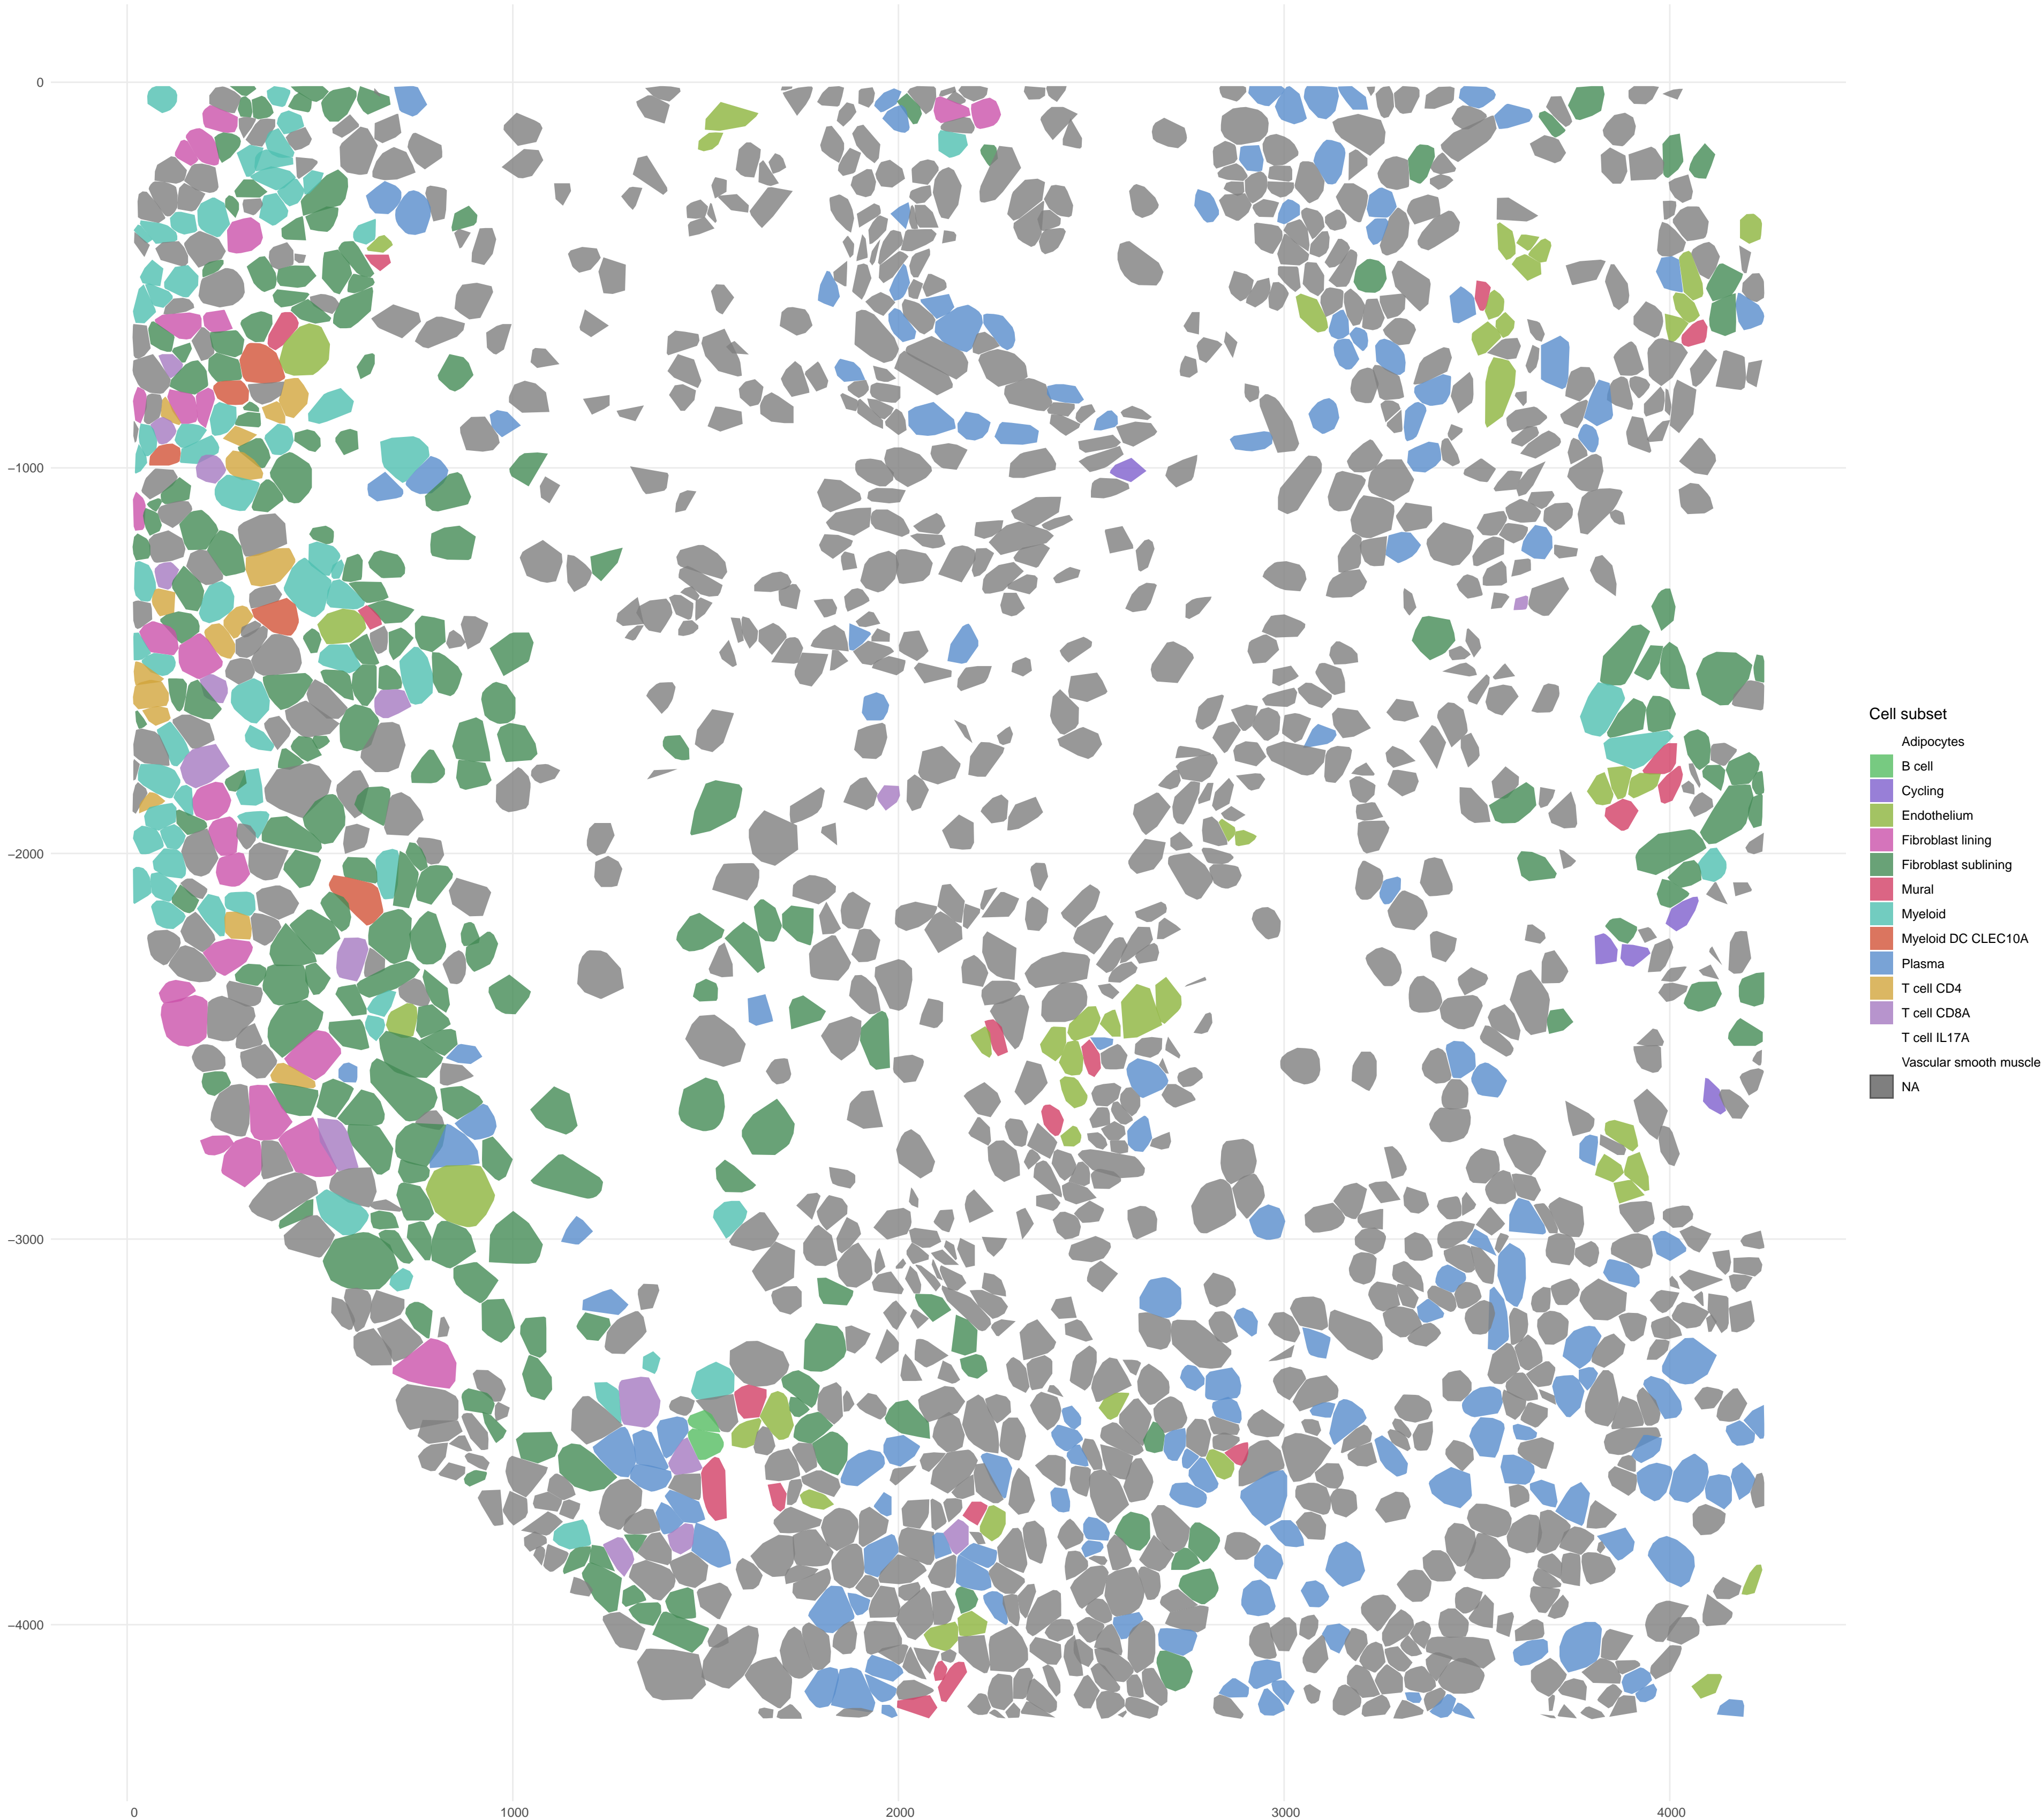



BX423 Baseline

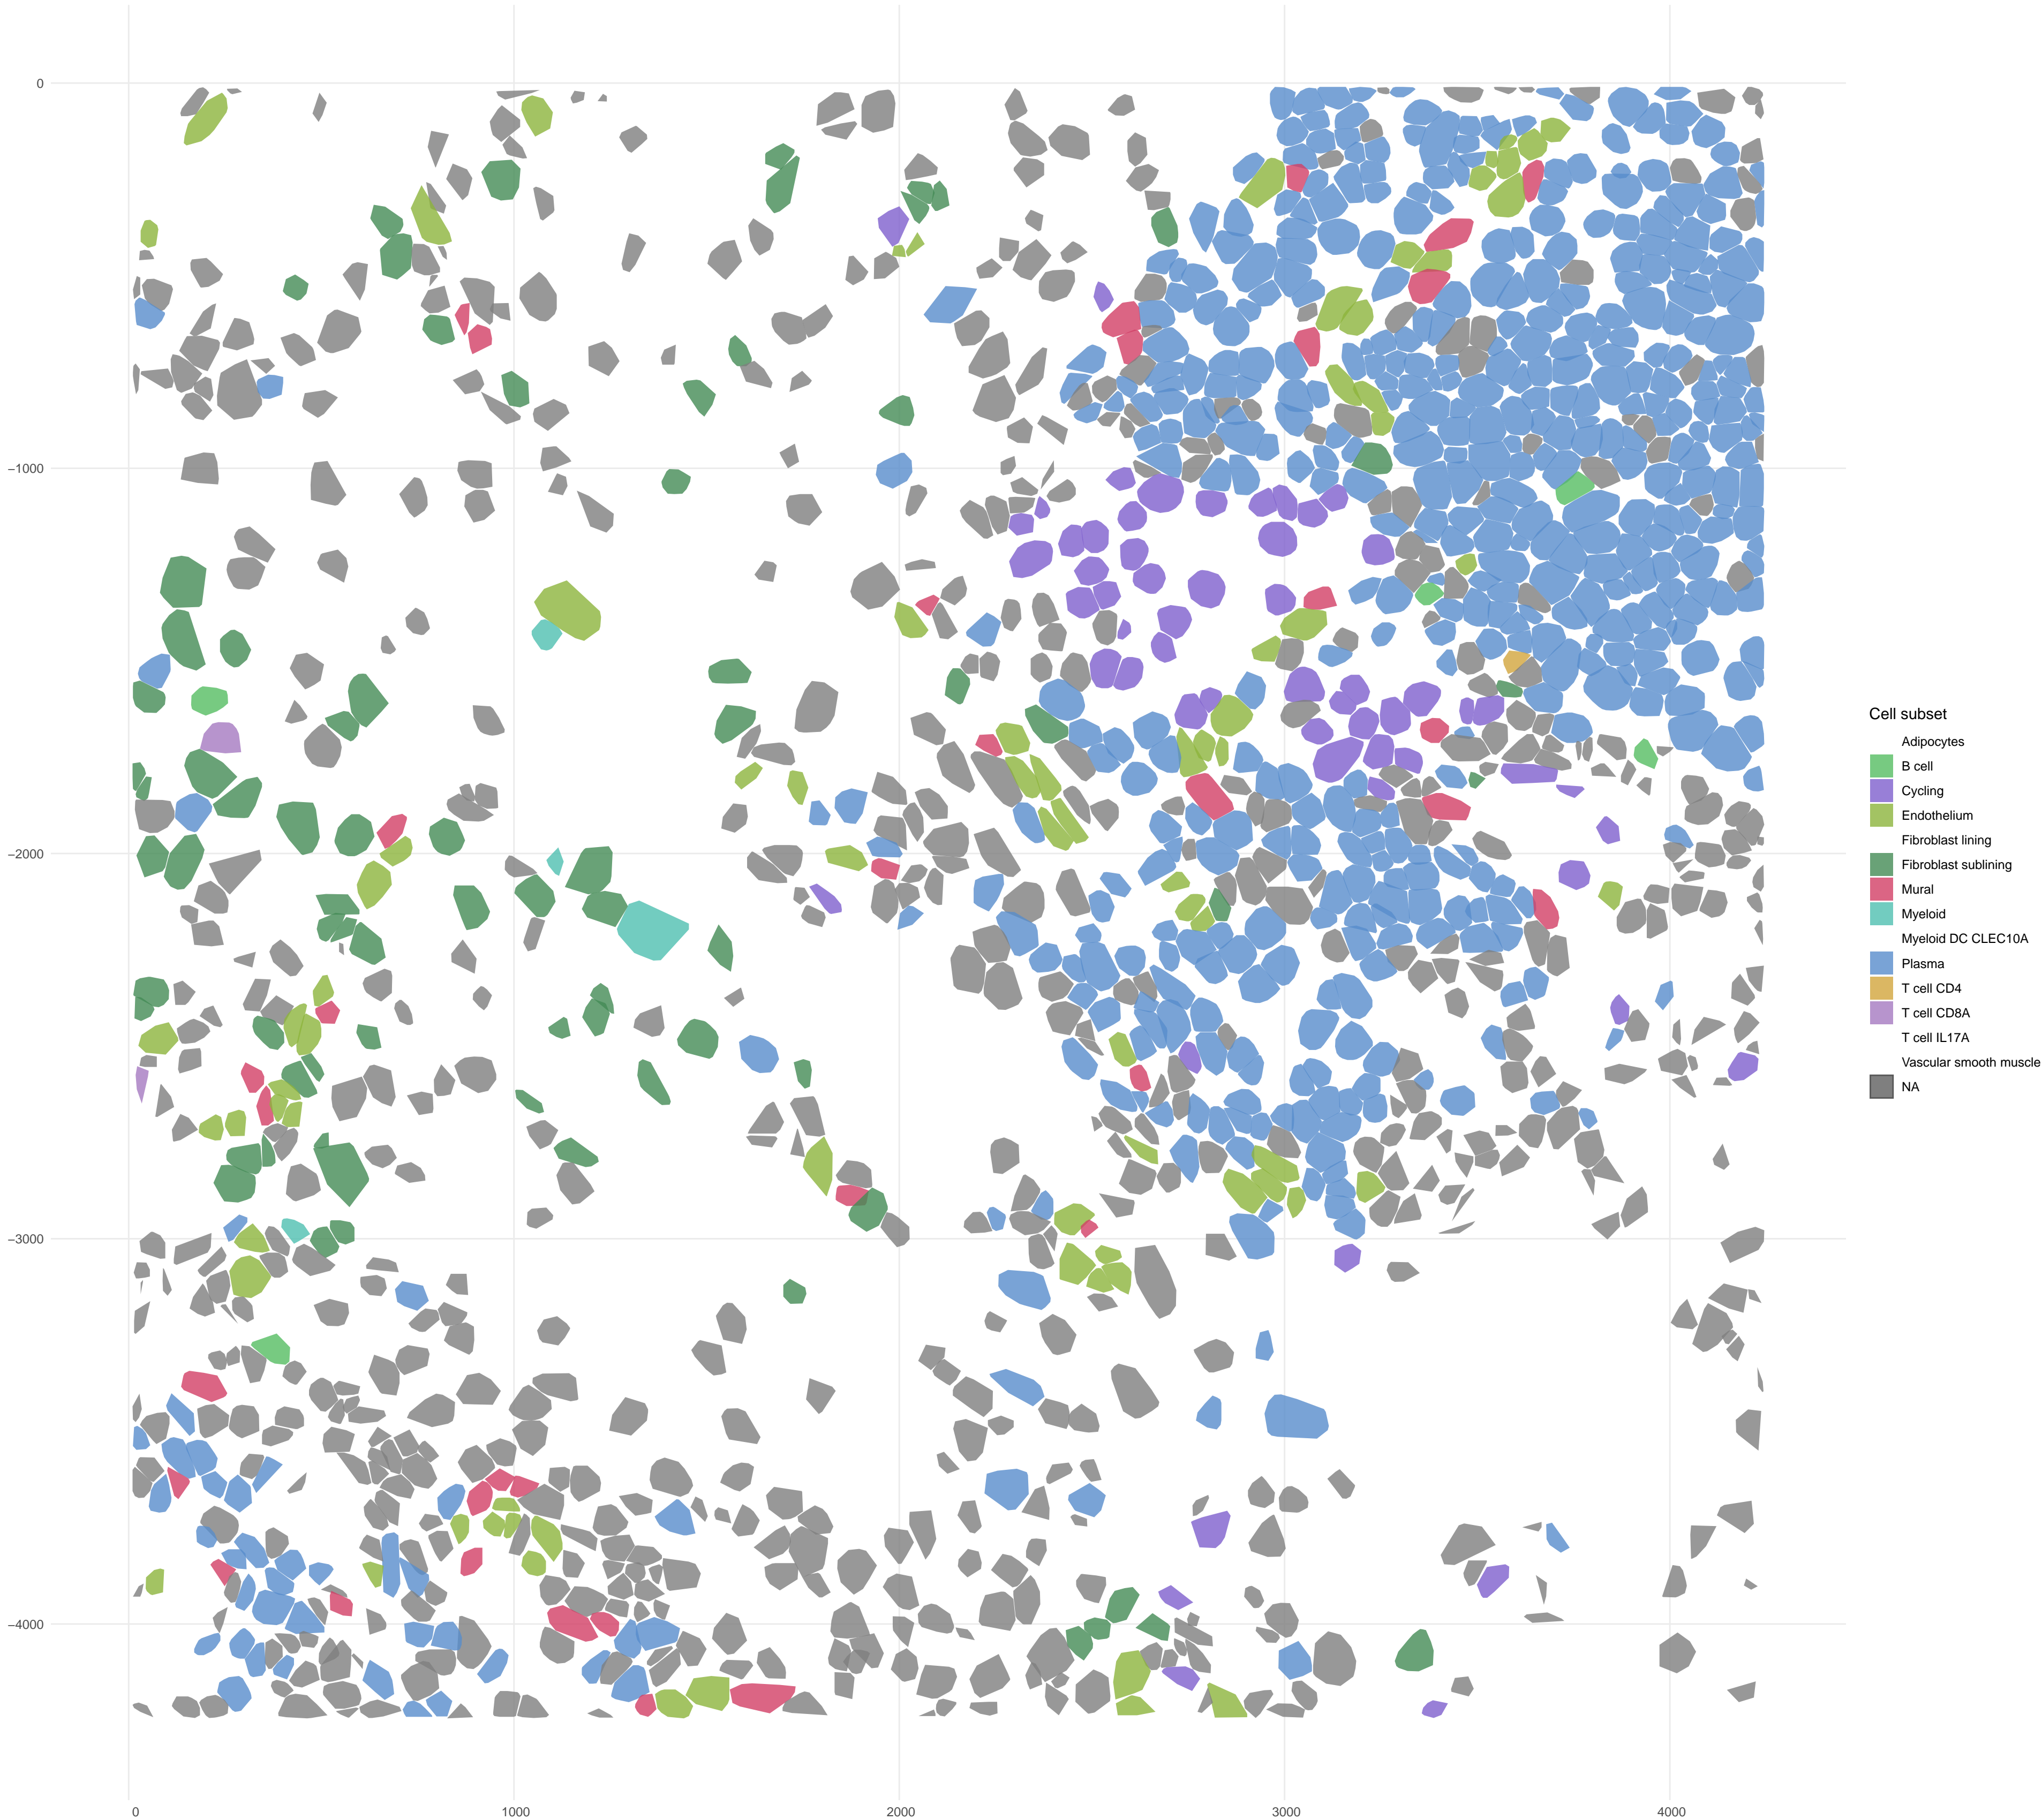

BX423 Baseline

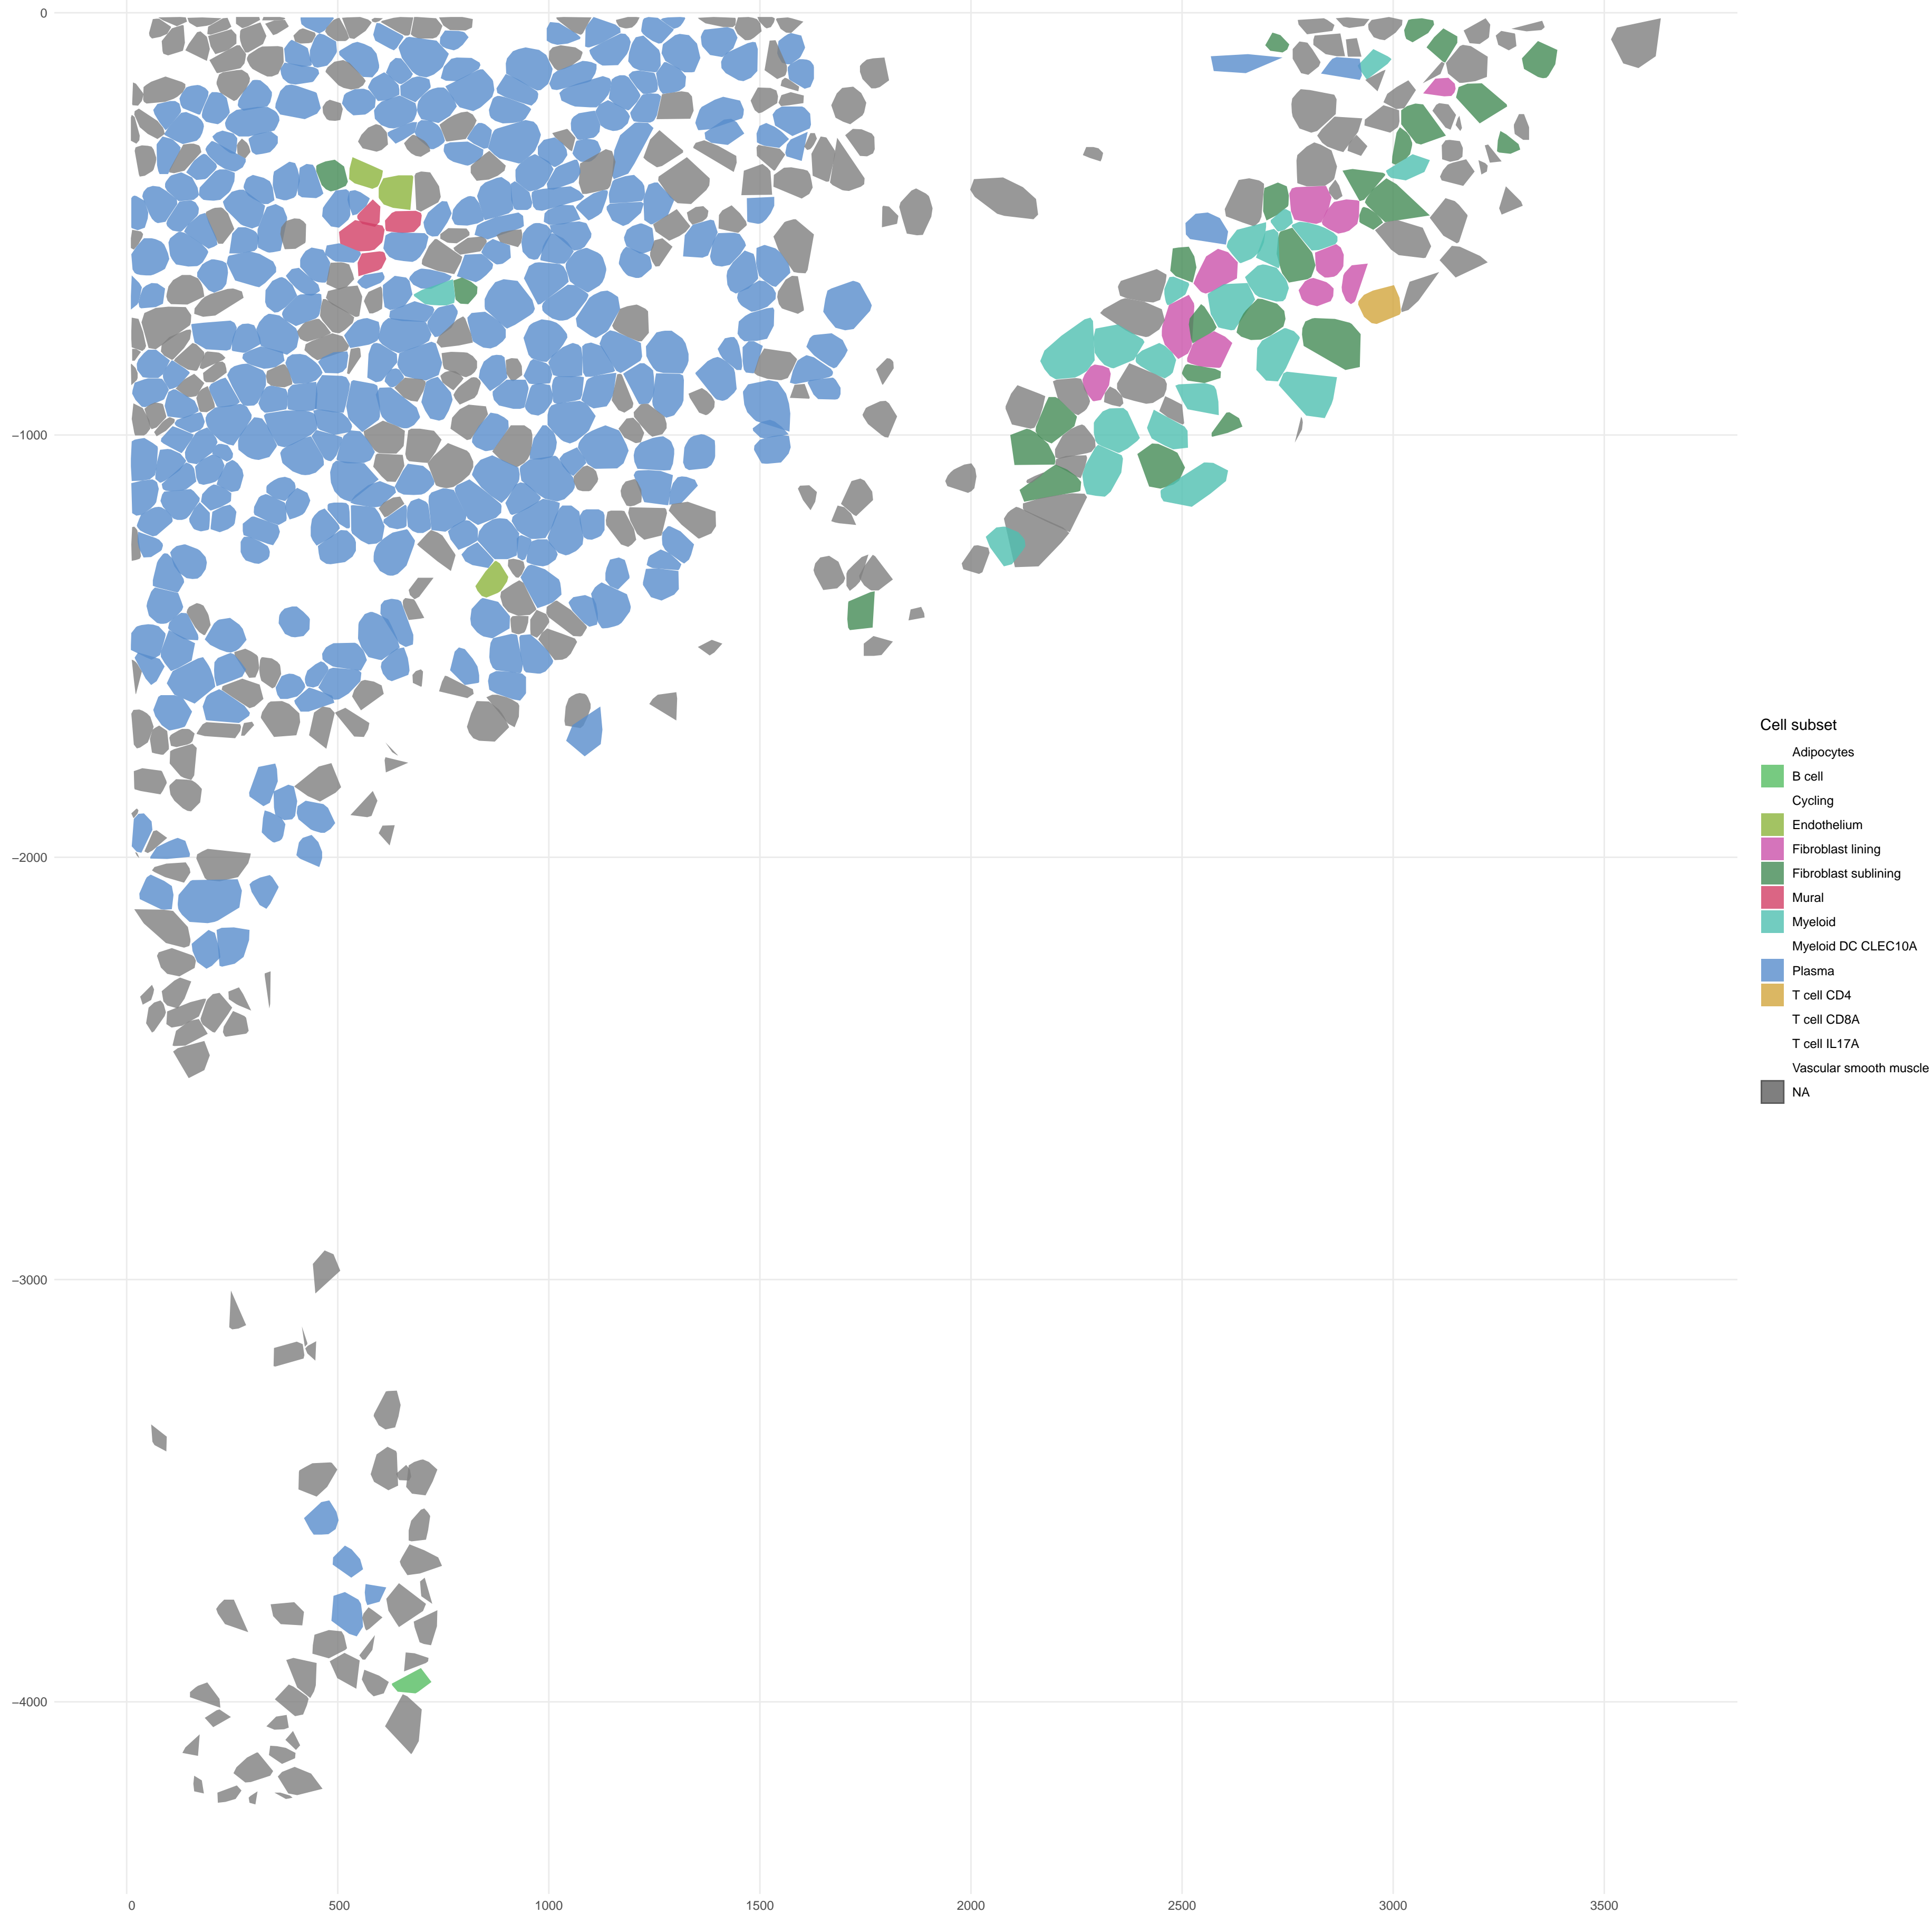

BX423 Baseline

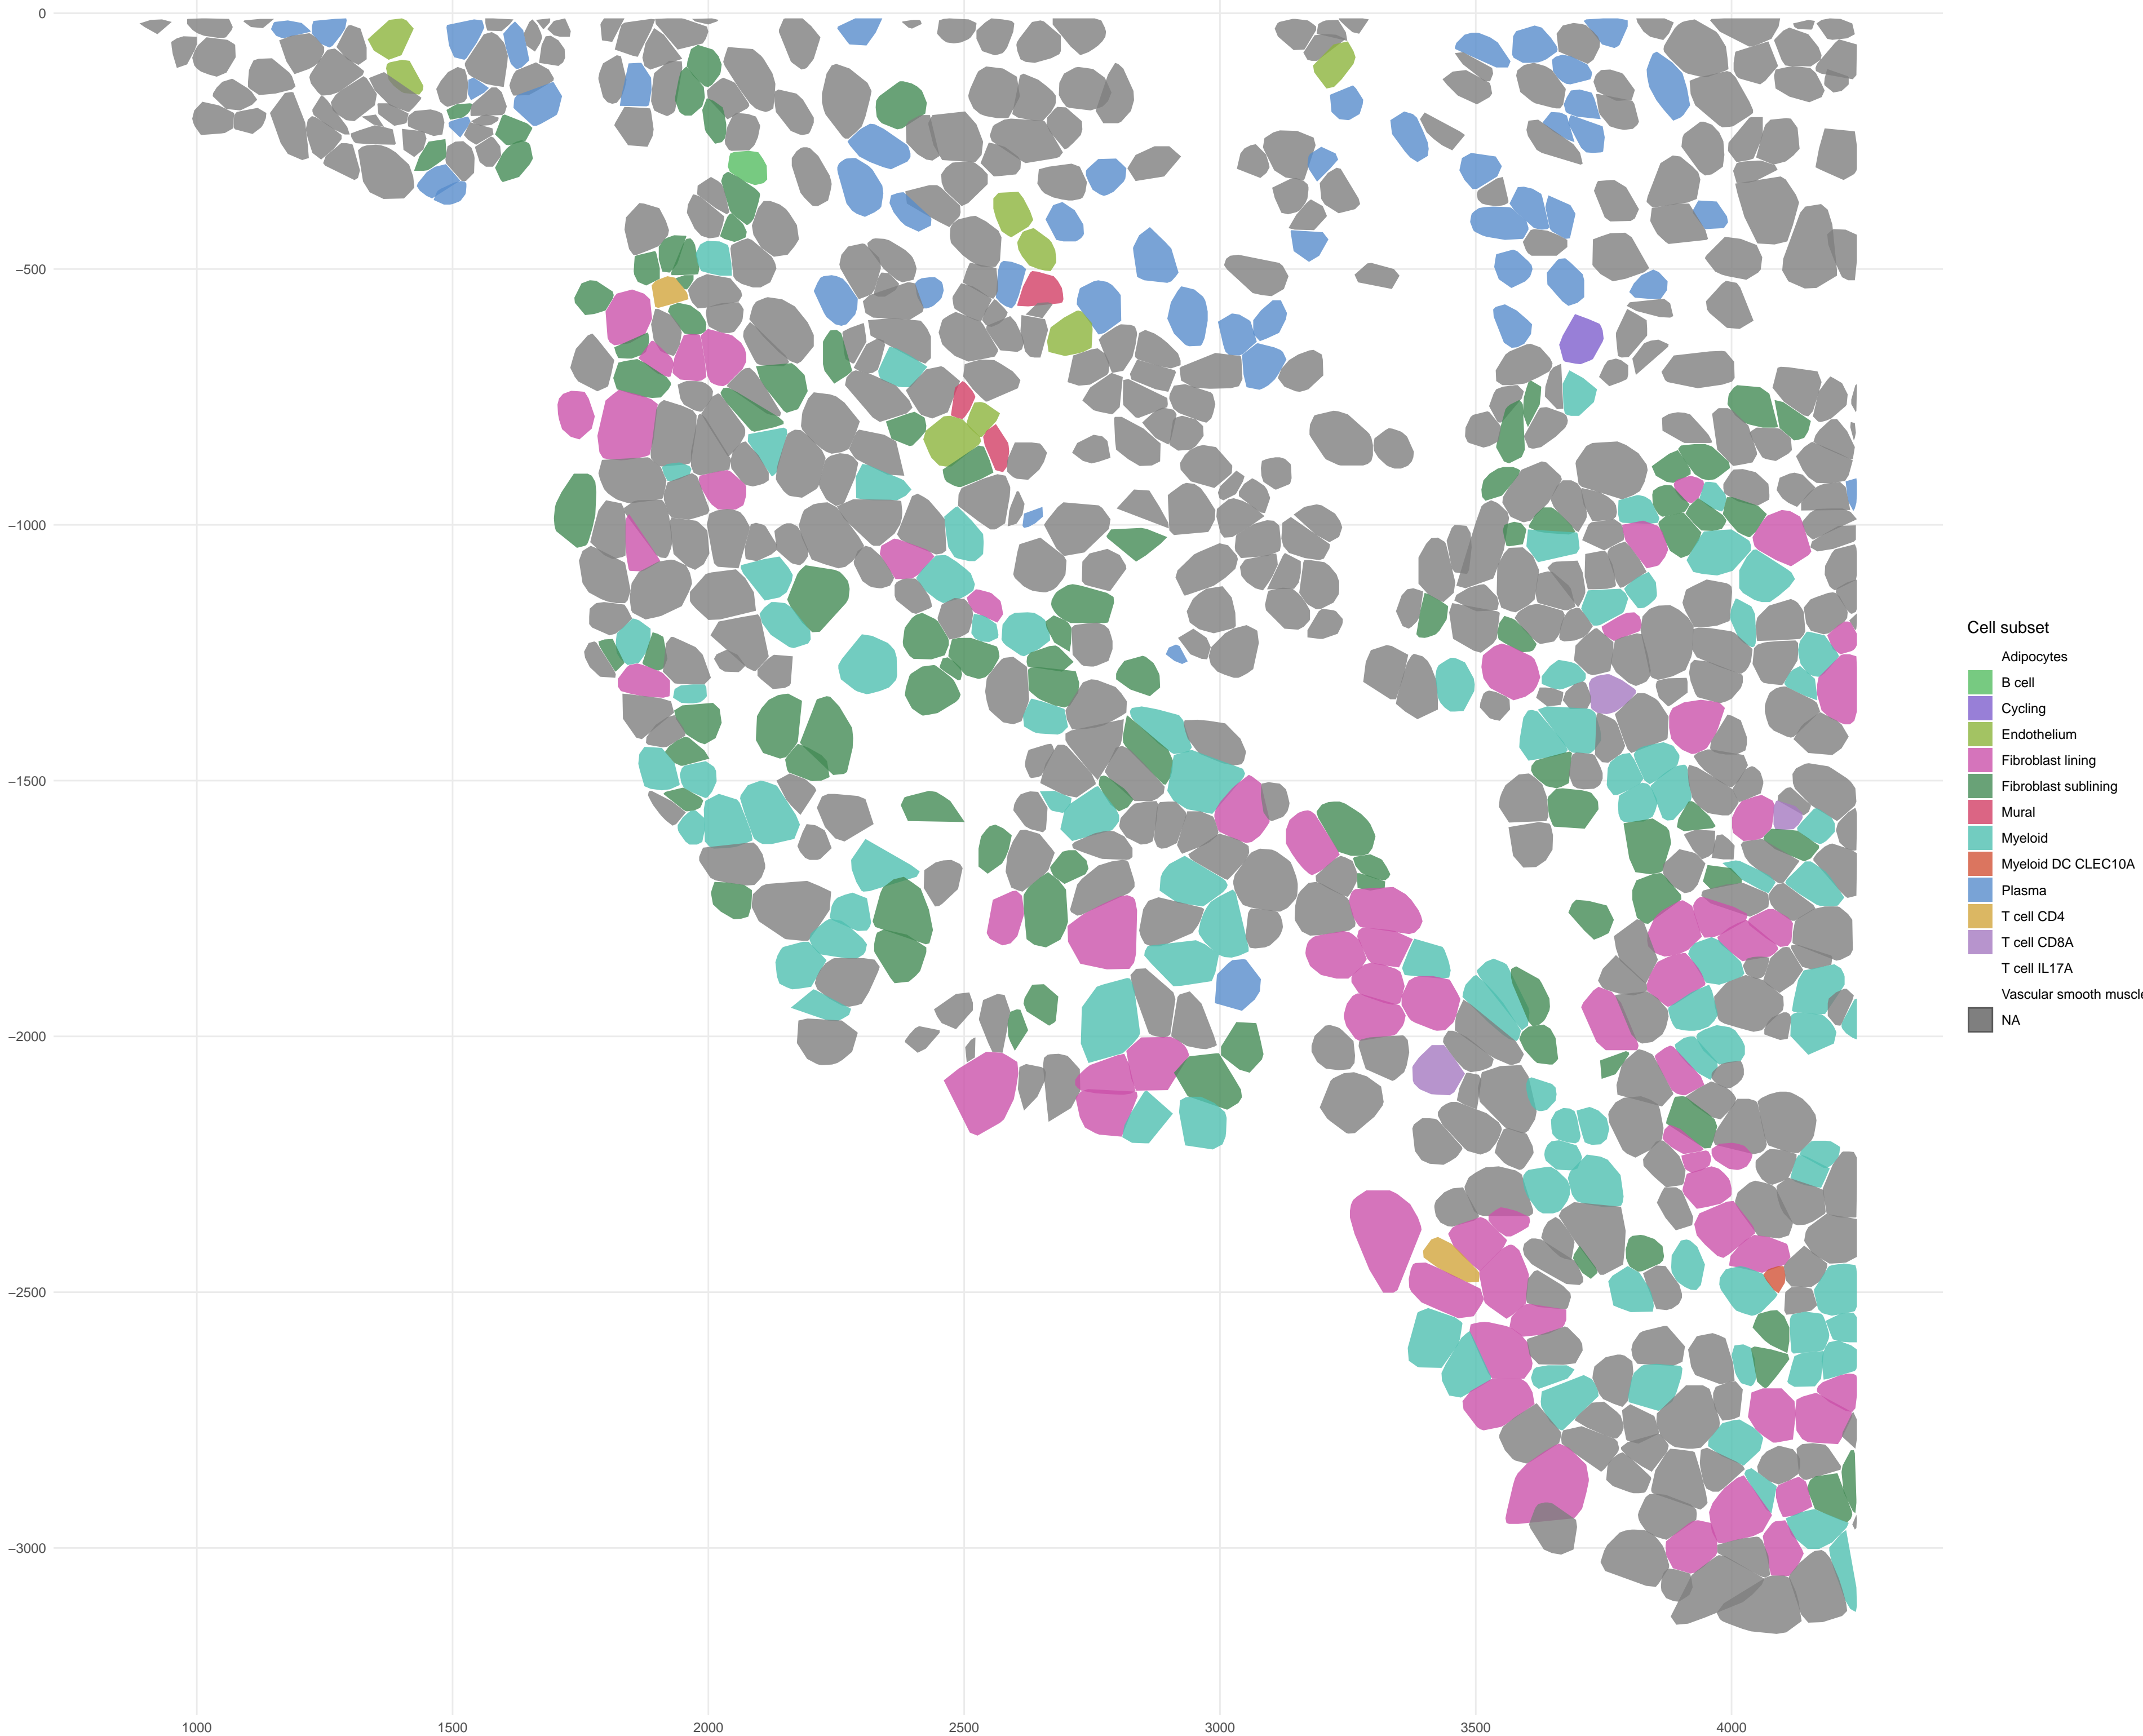



BX423 Baseline

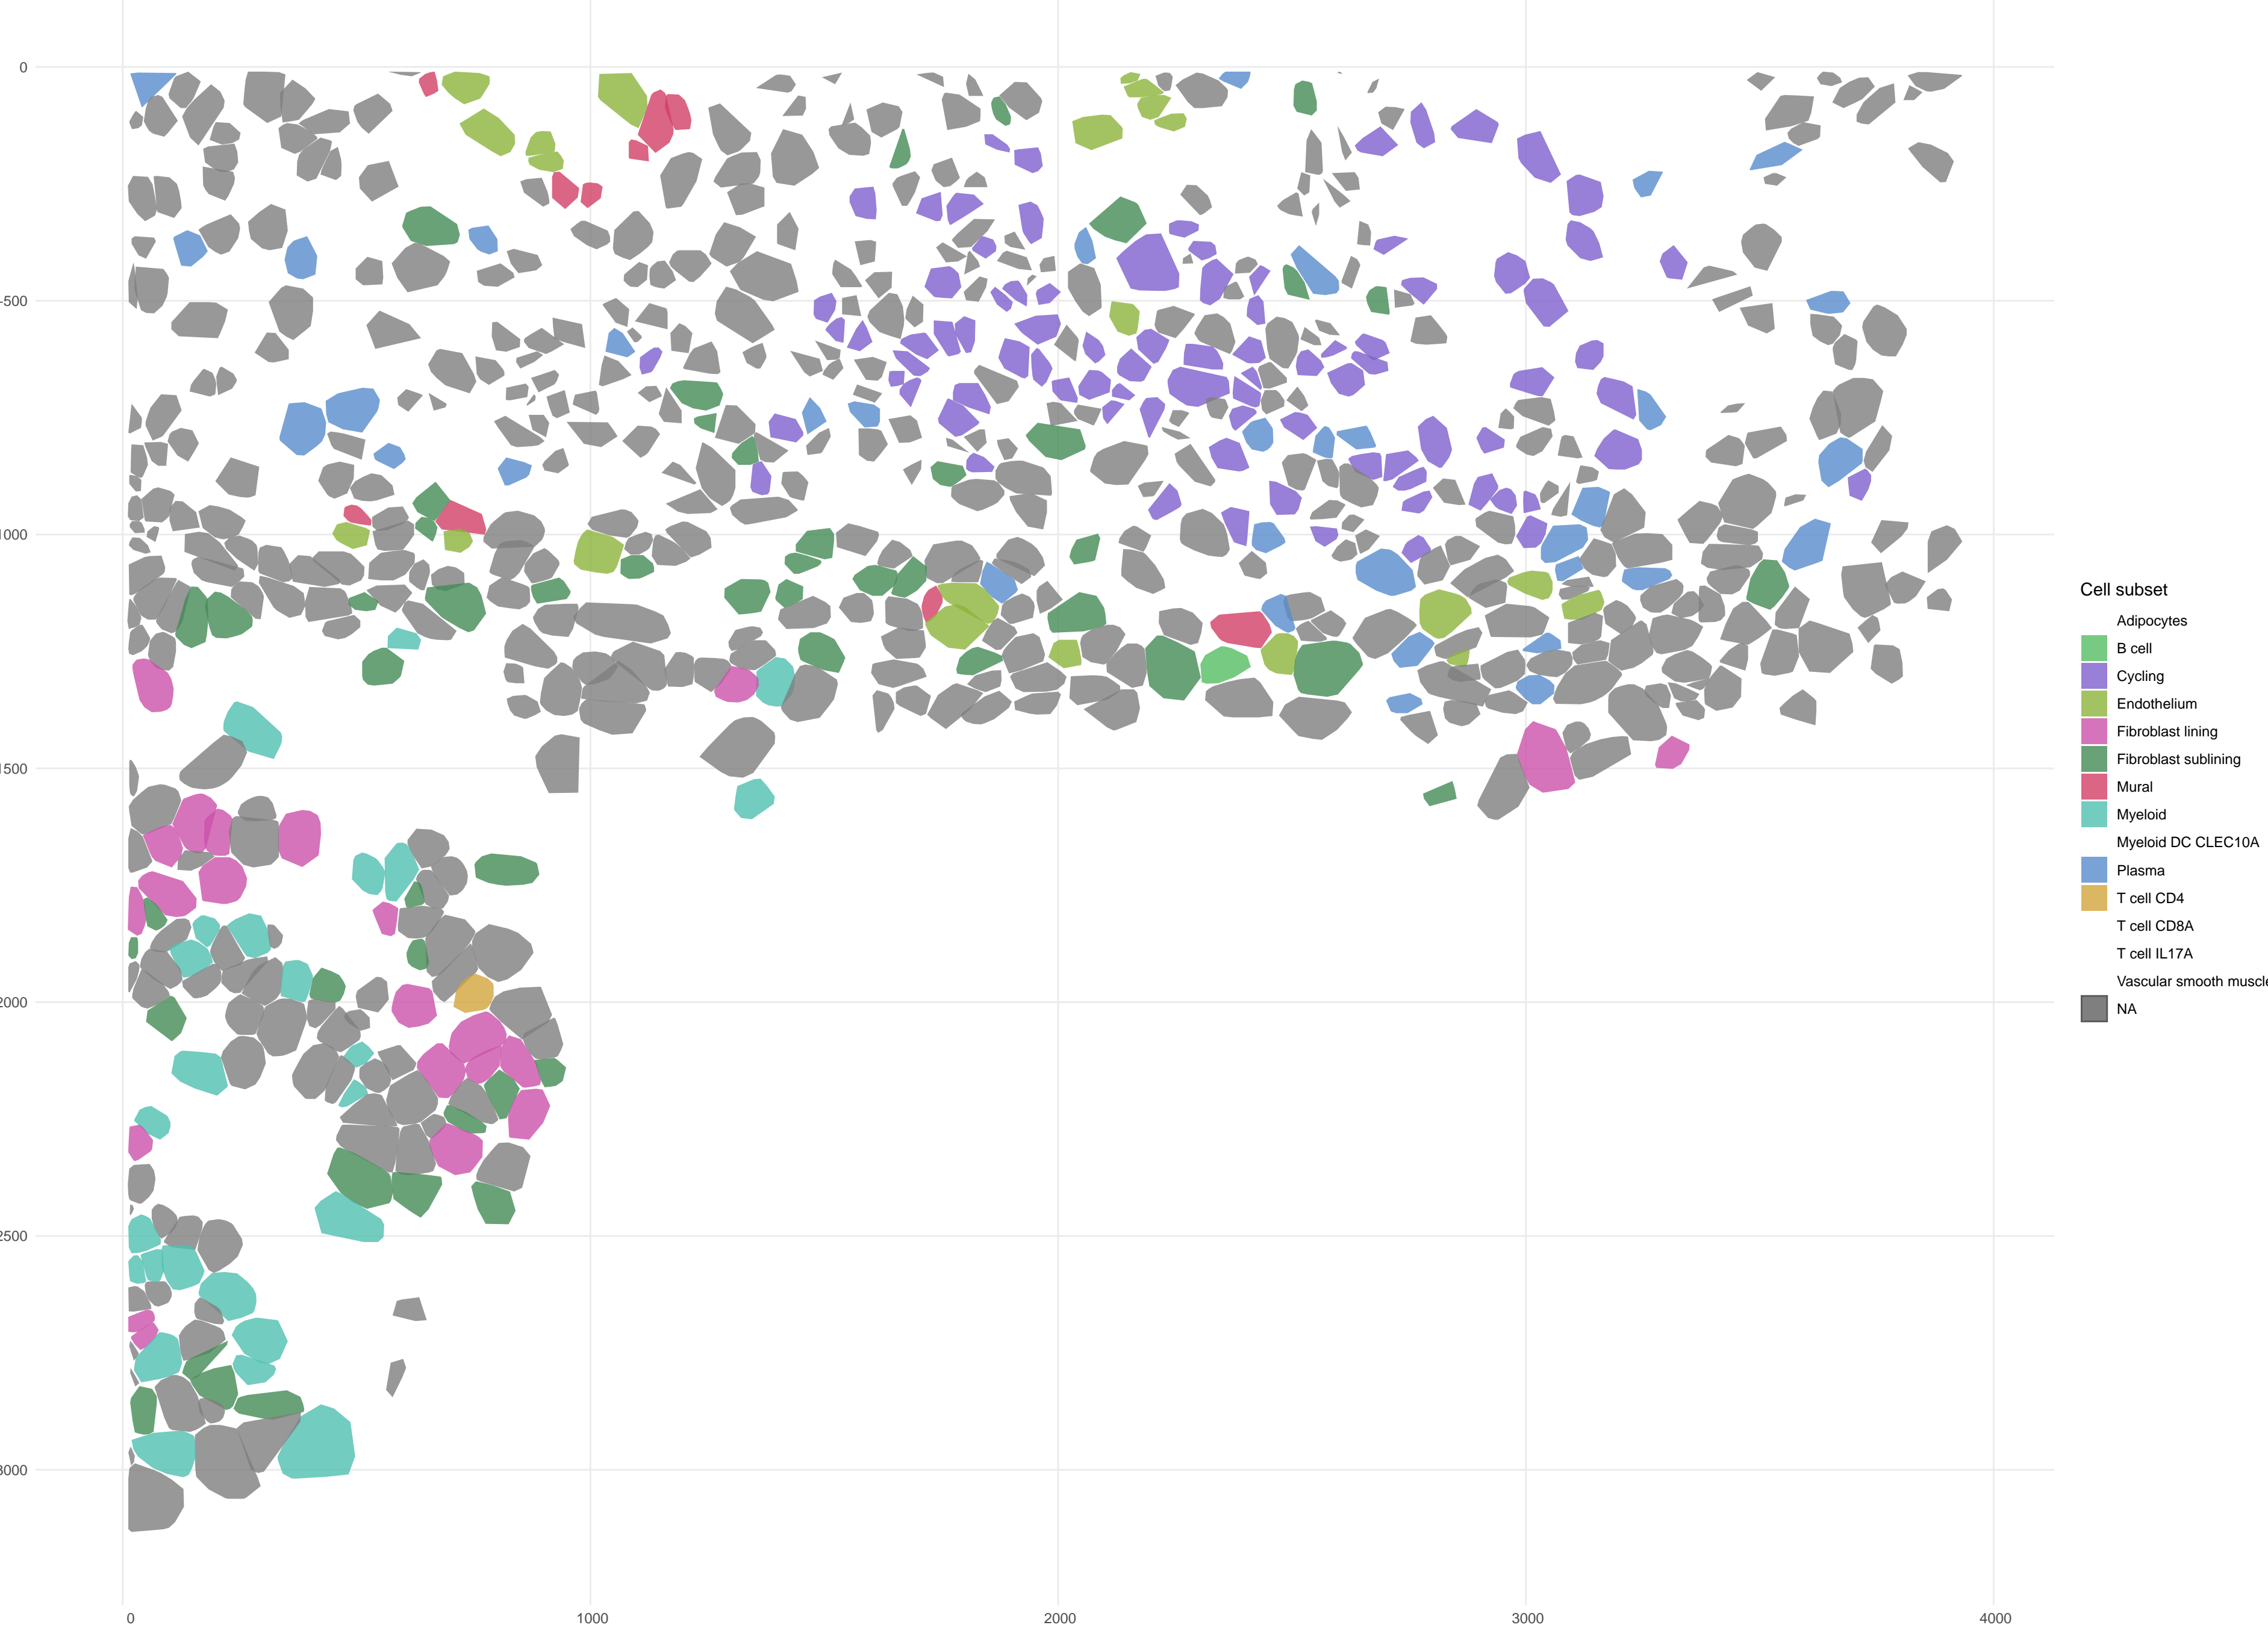

BX441 Post\_Treatment

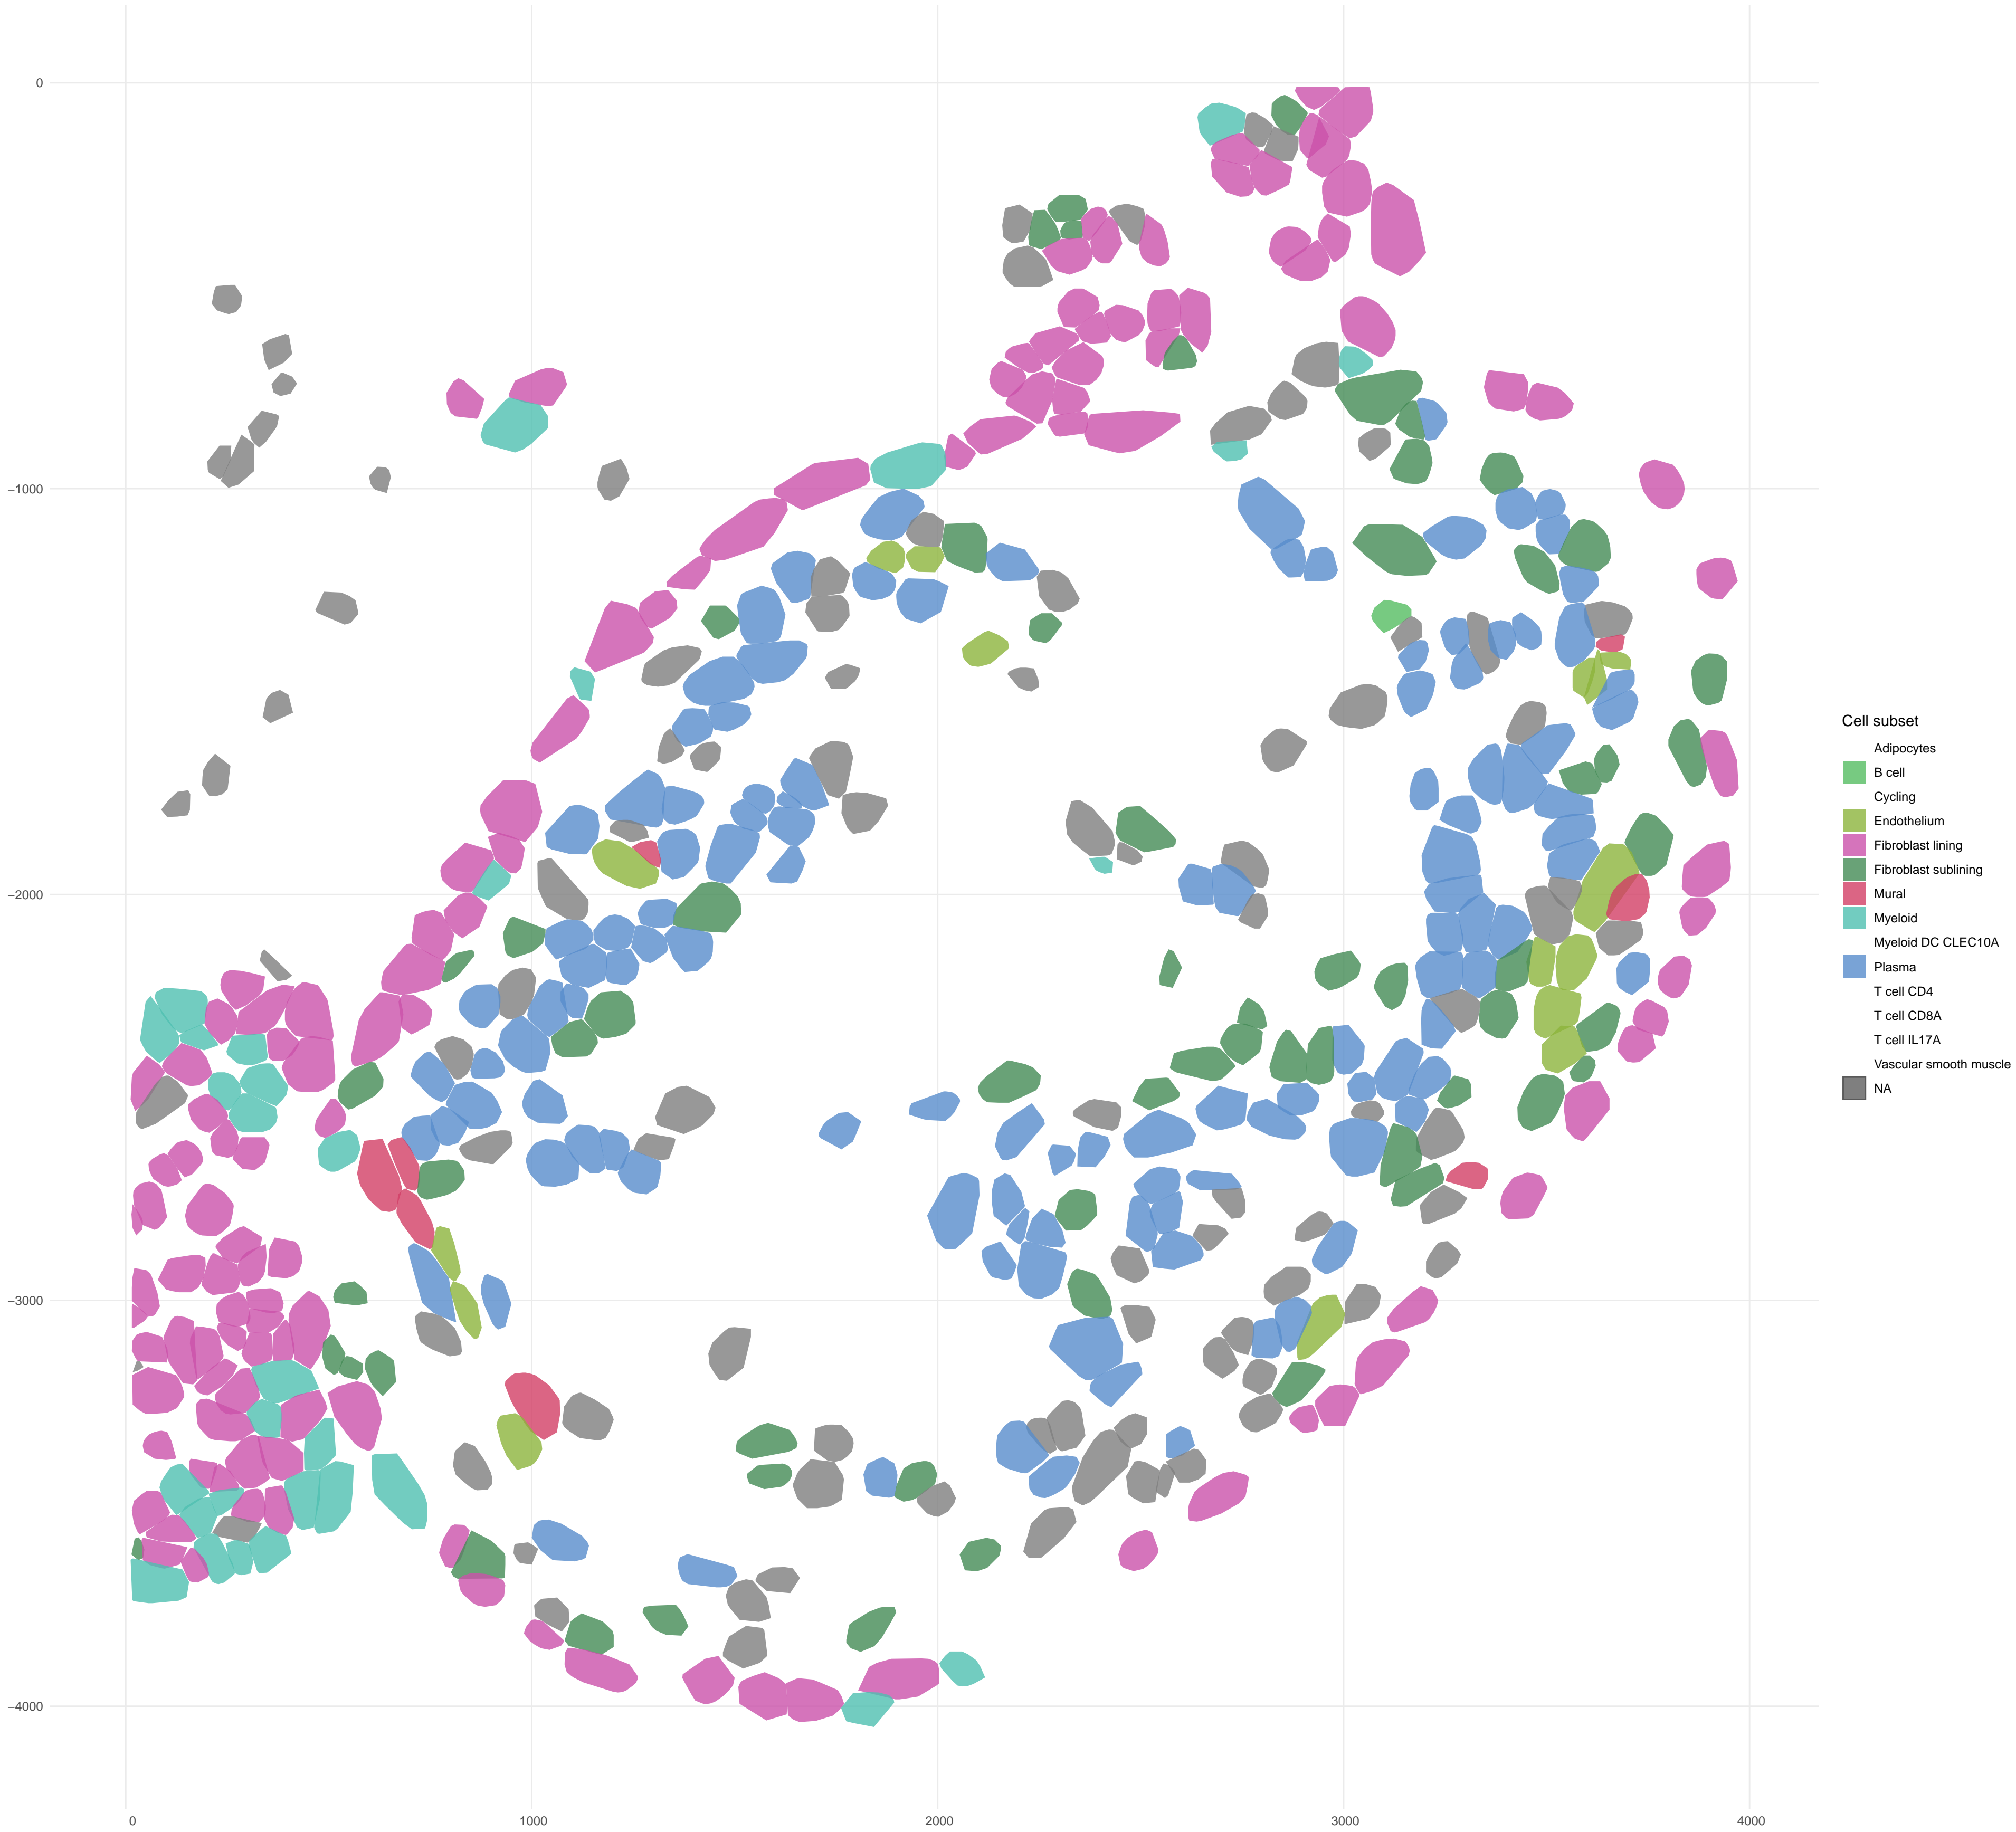

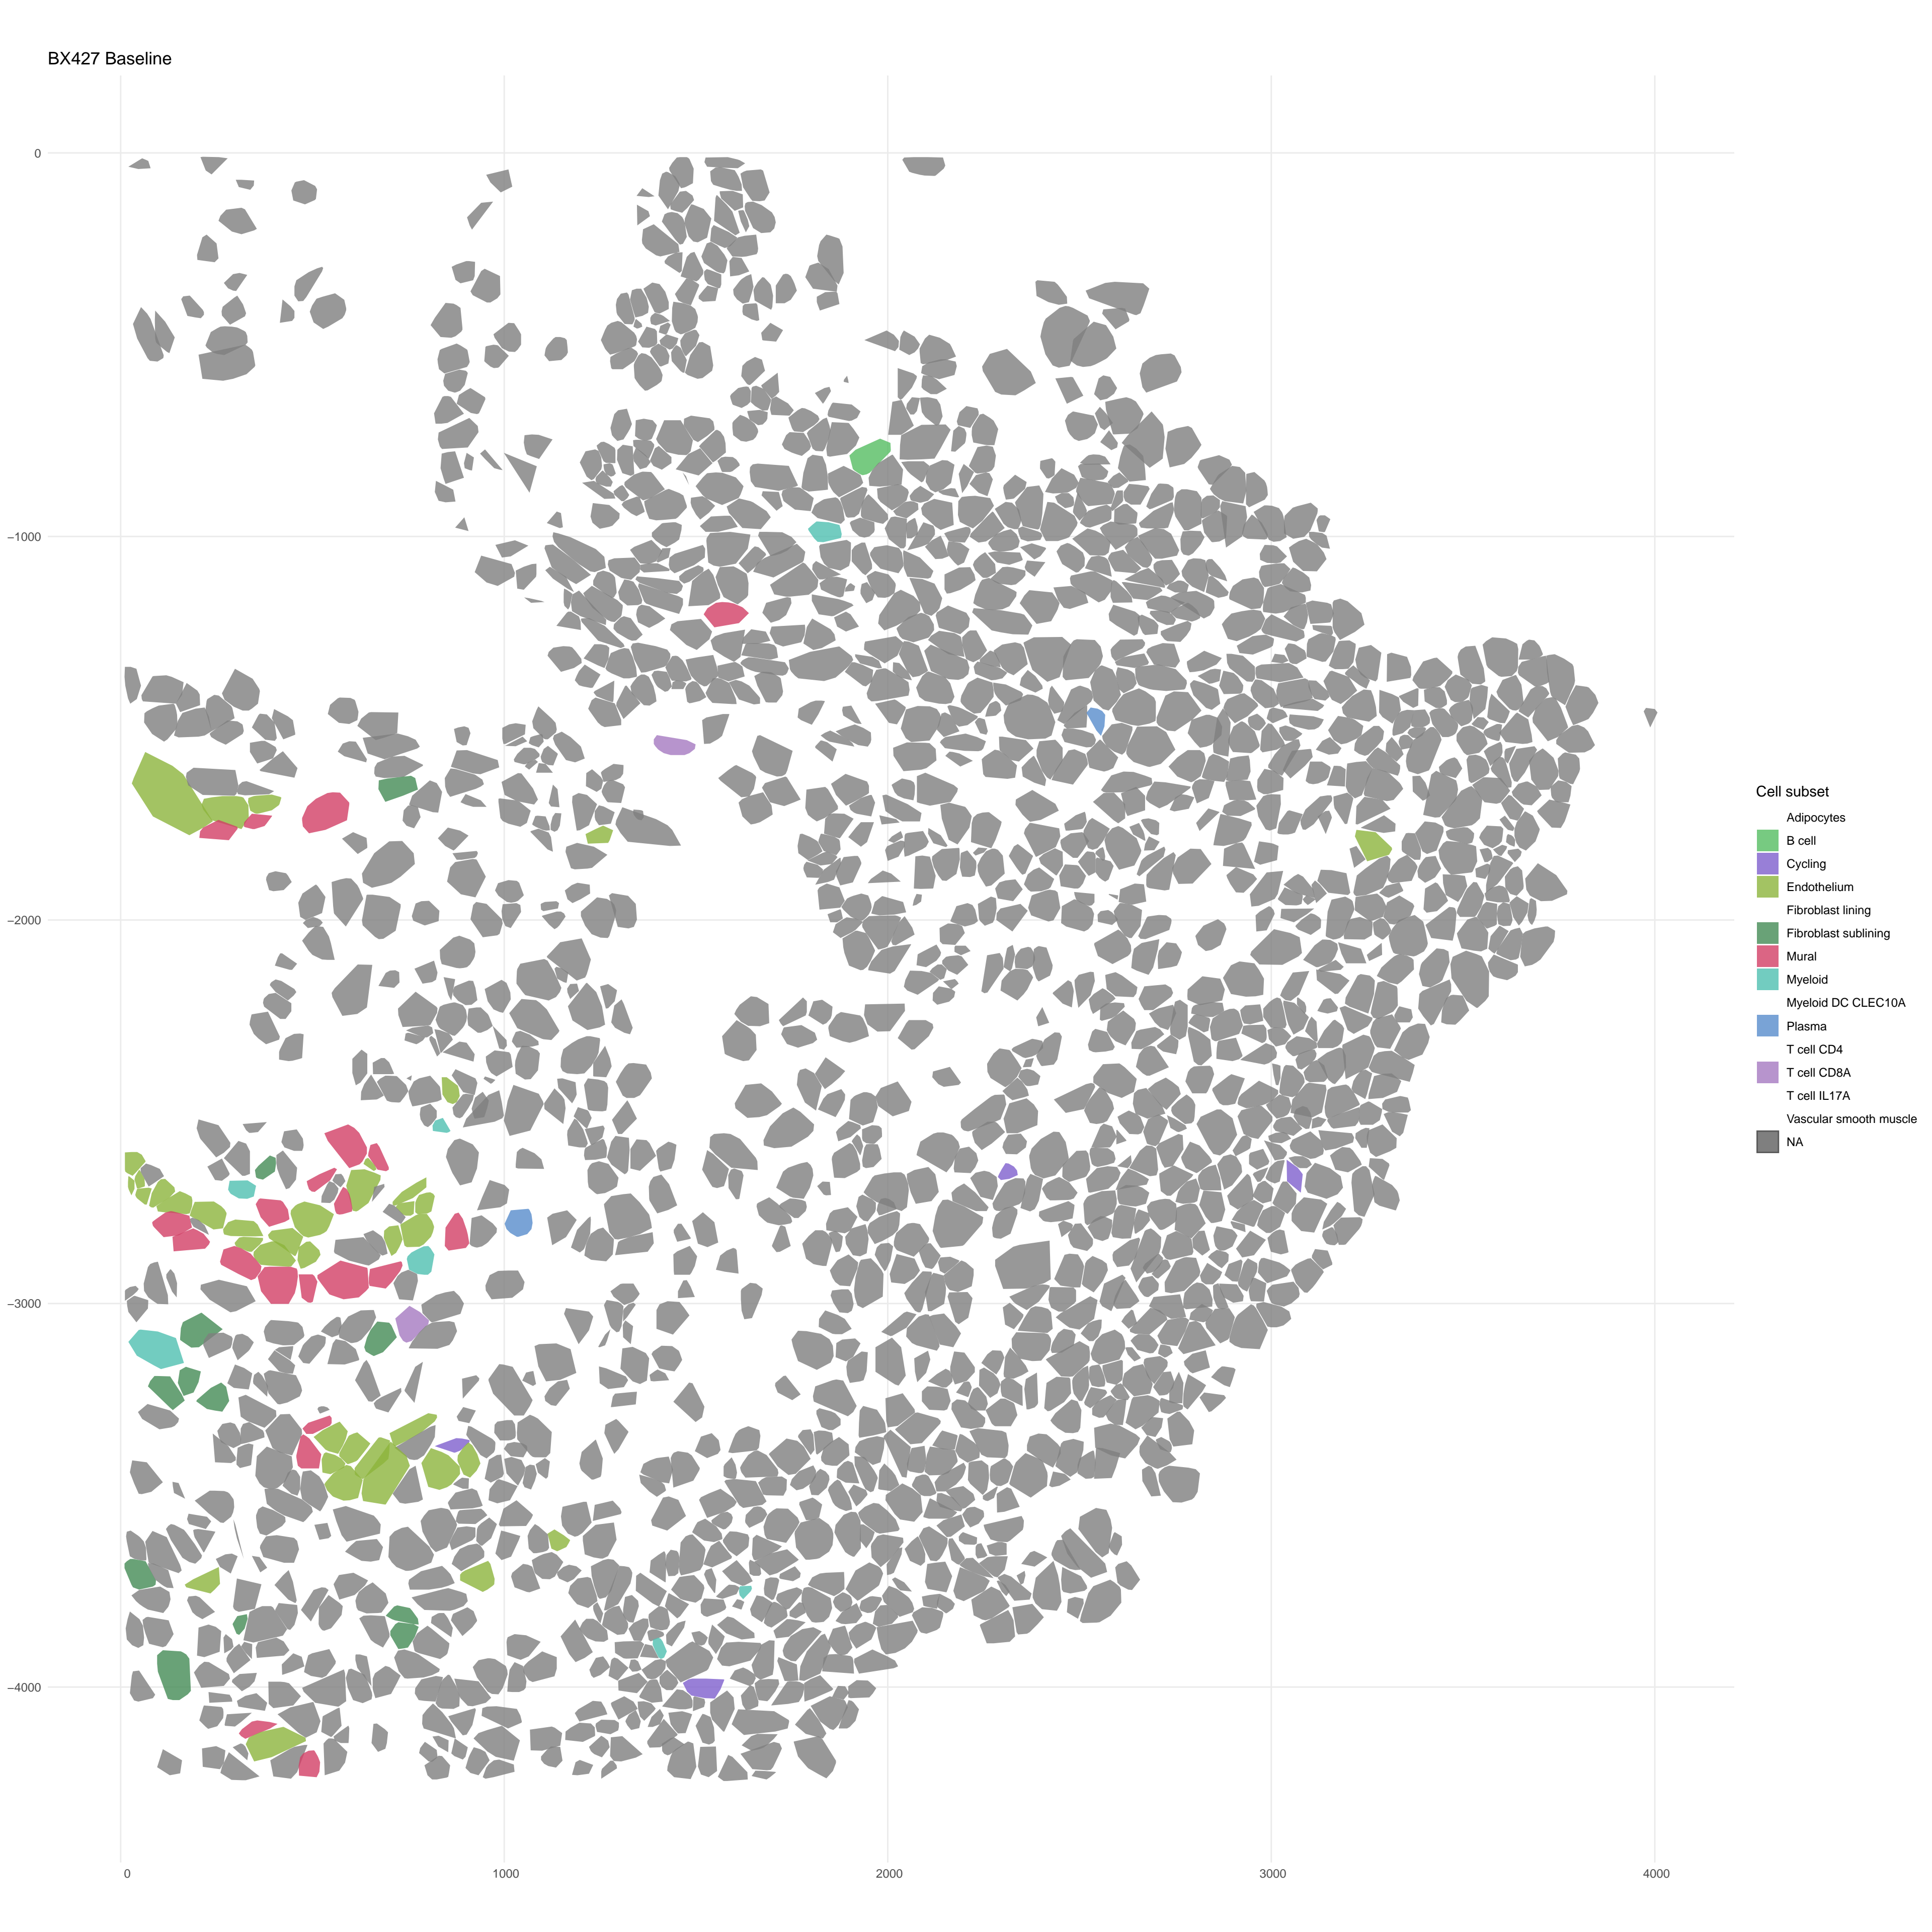



BX439 Post\_Treatment

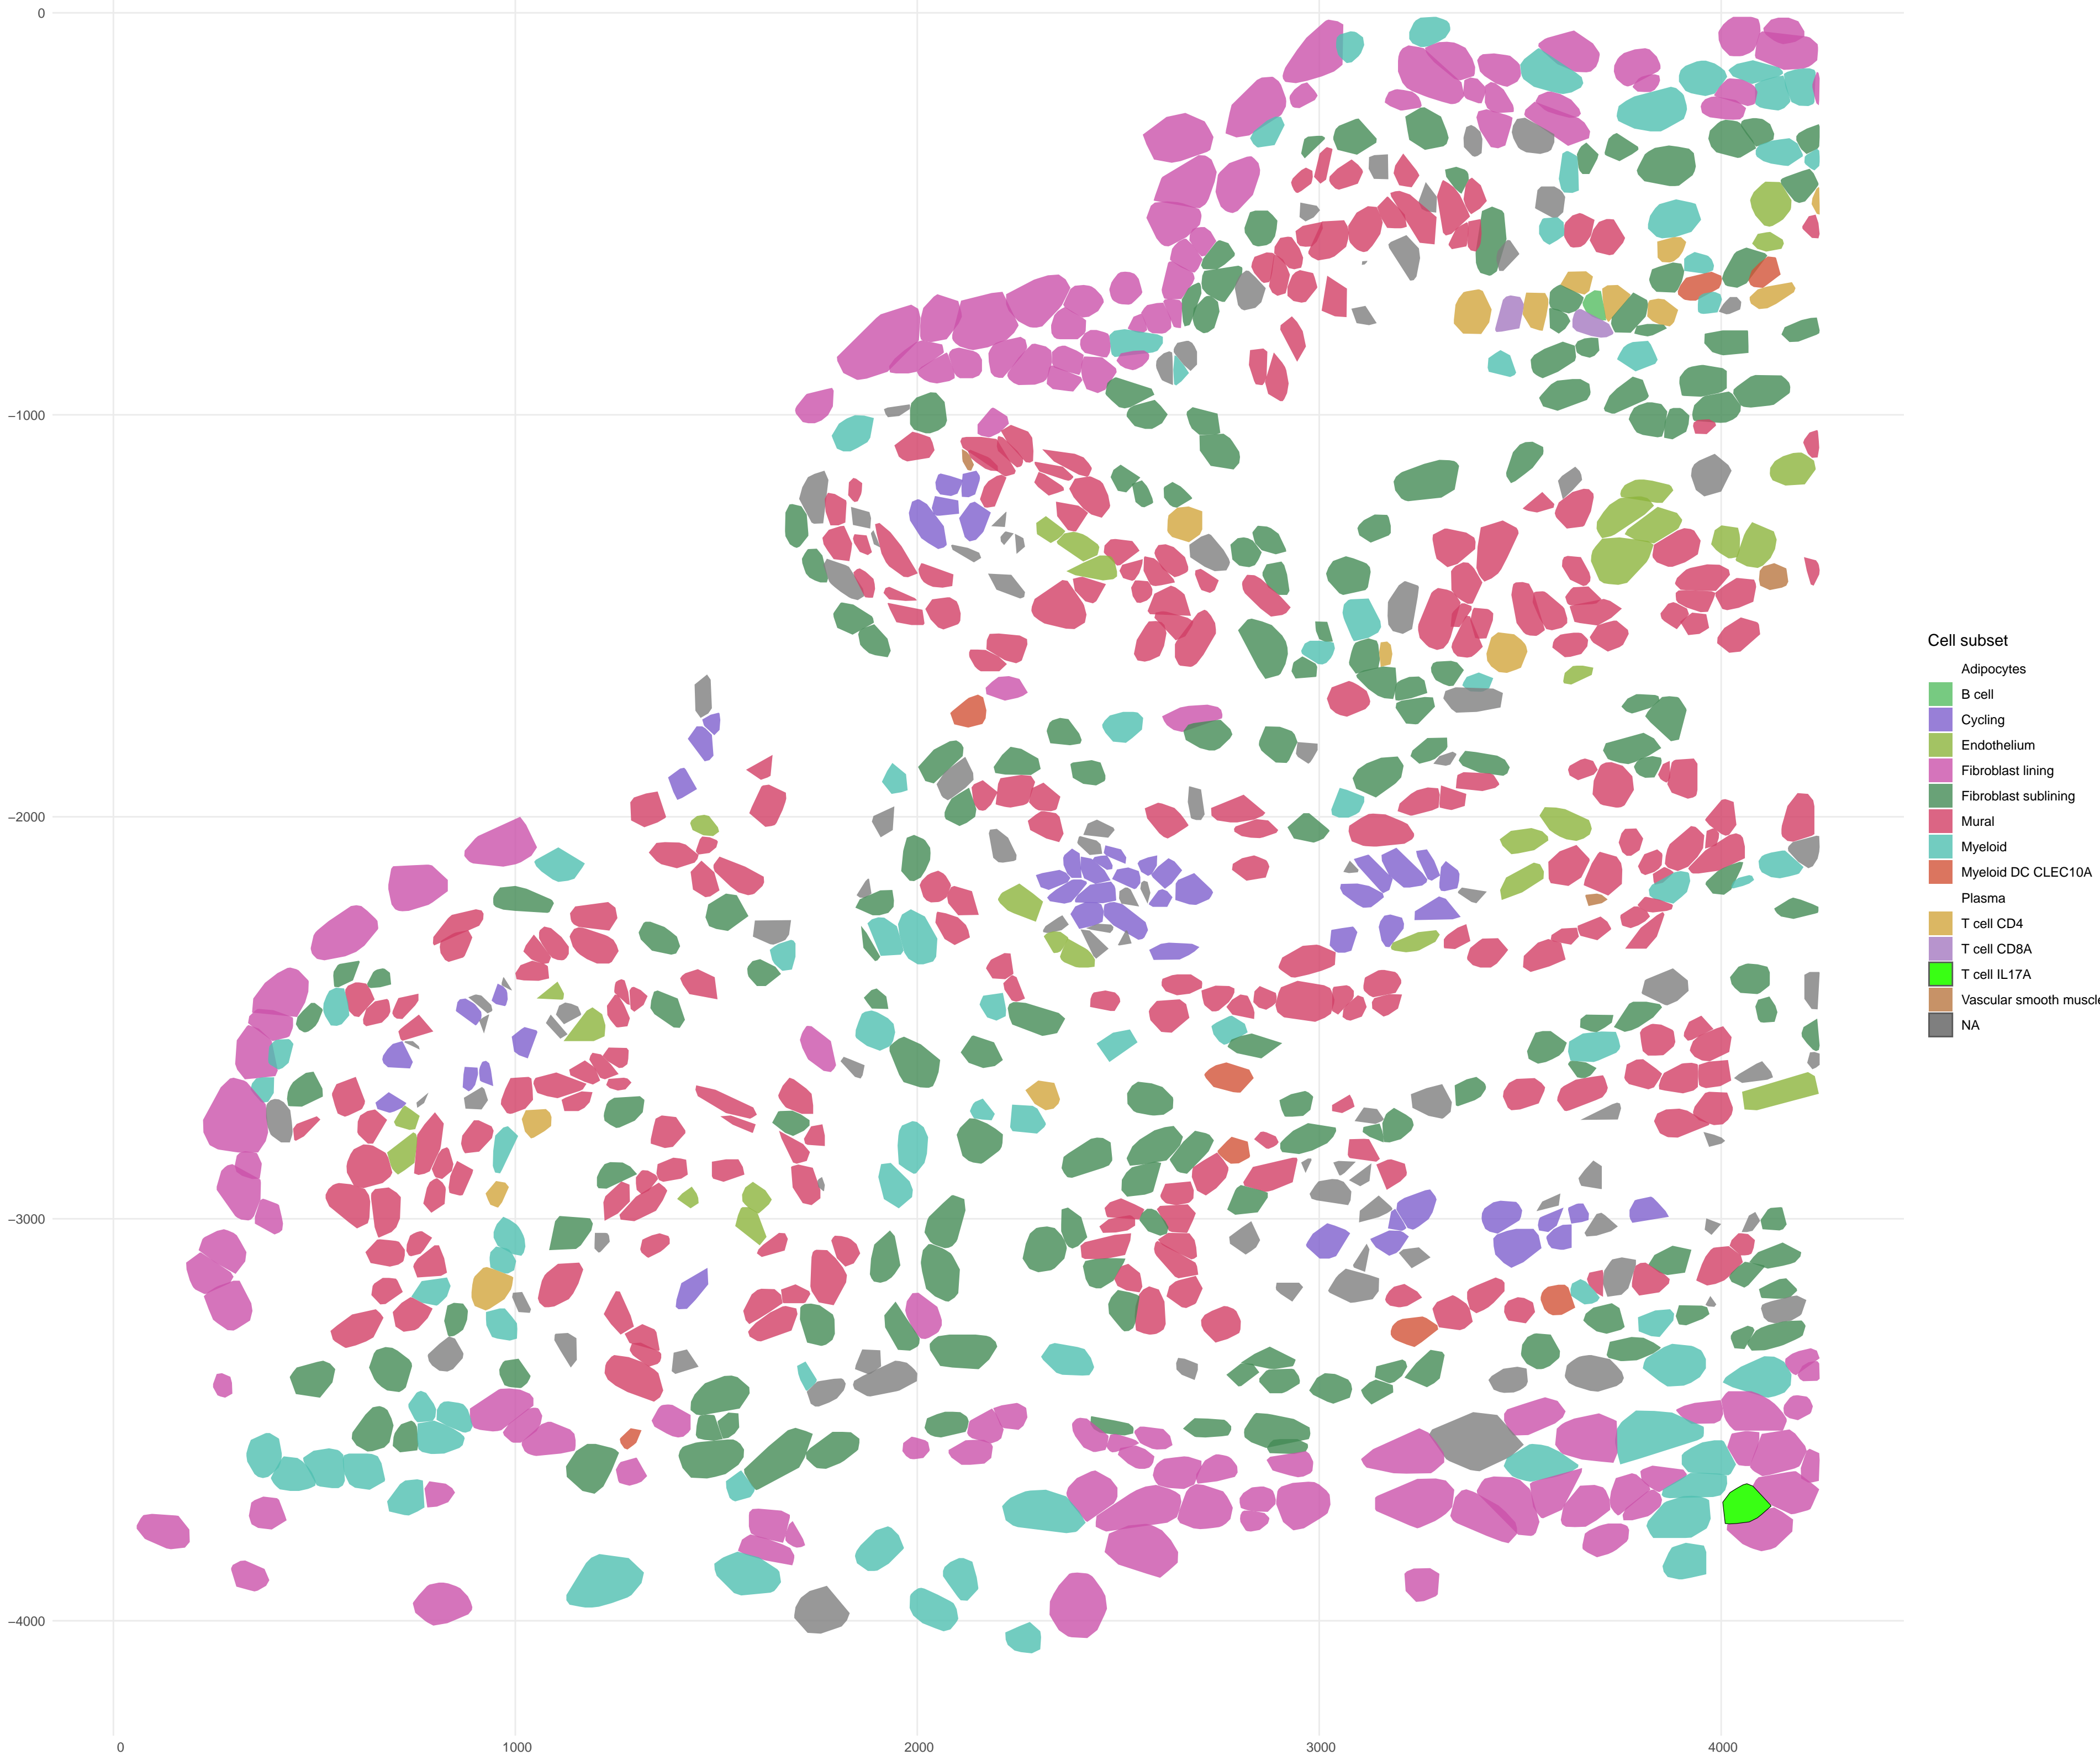

BX427 Baseline

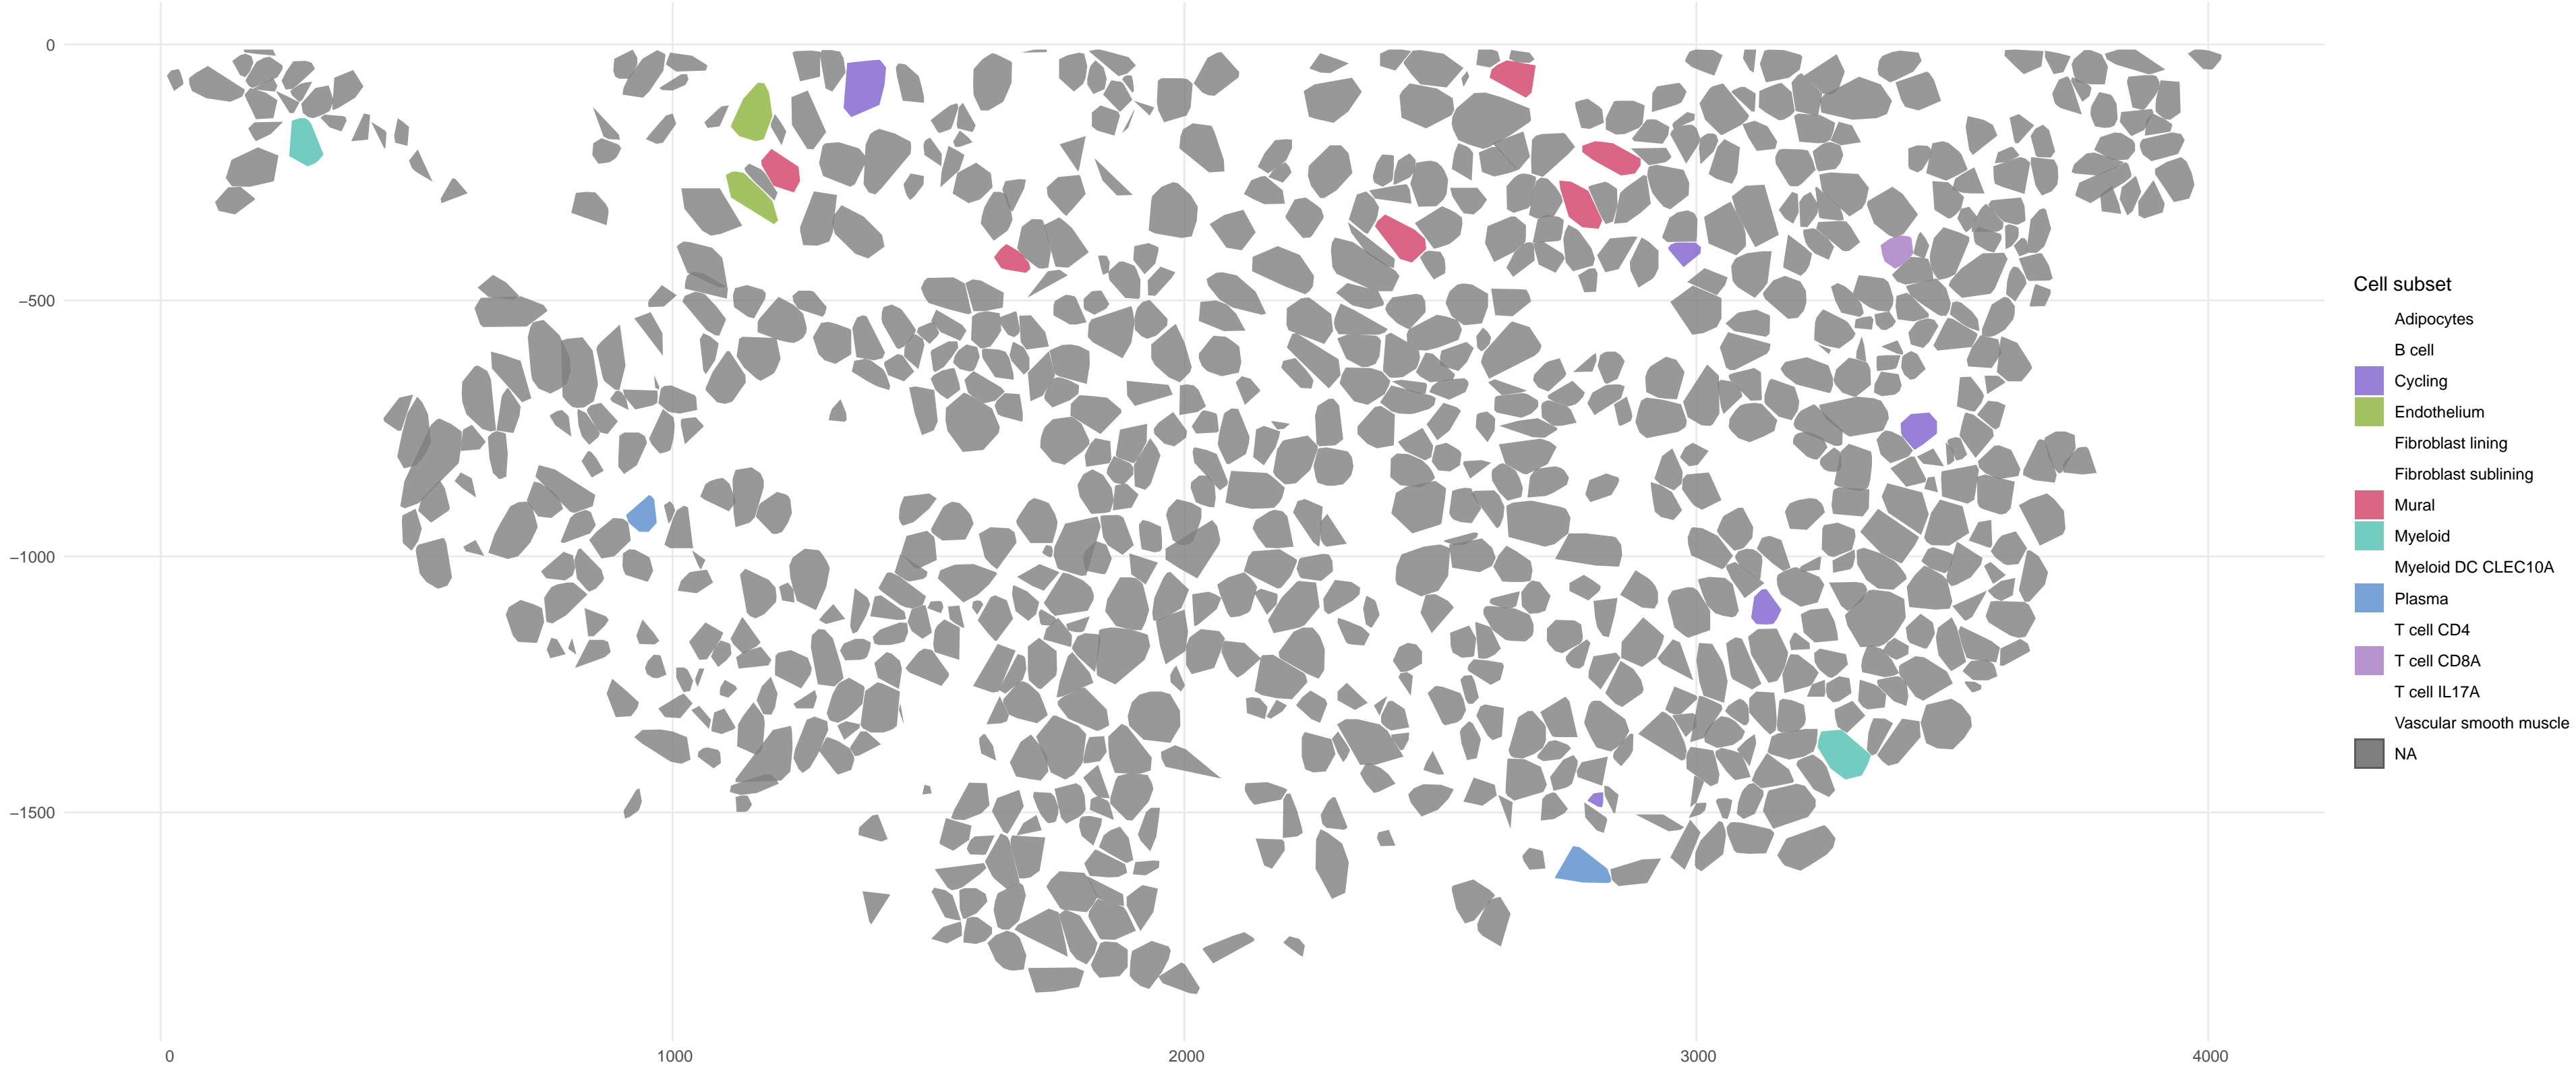

BX439 Post\_Treatment

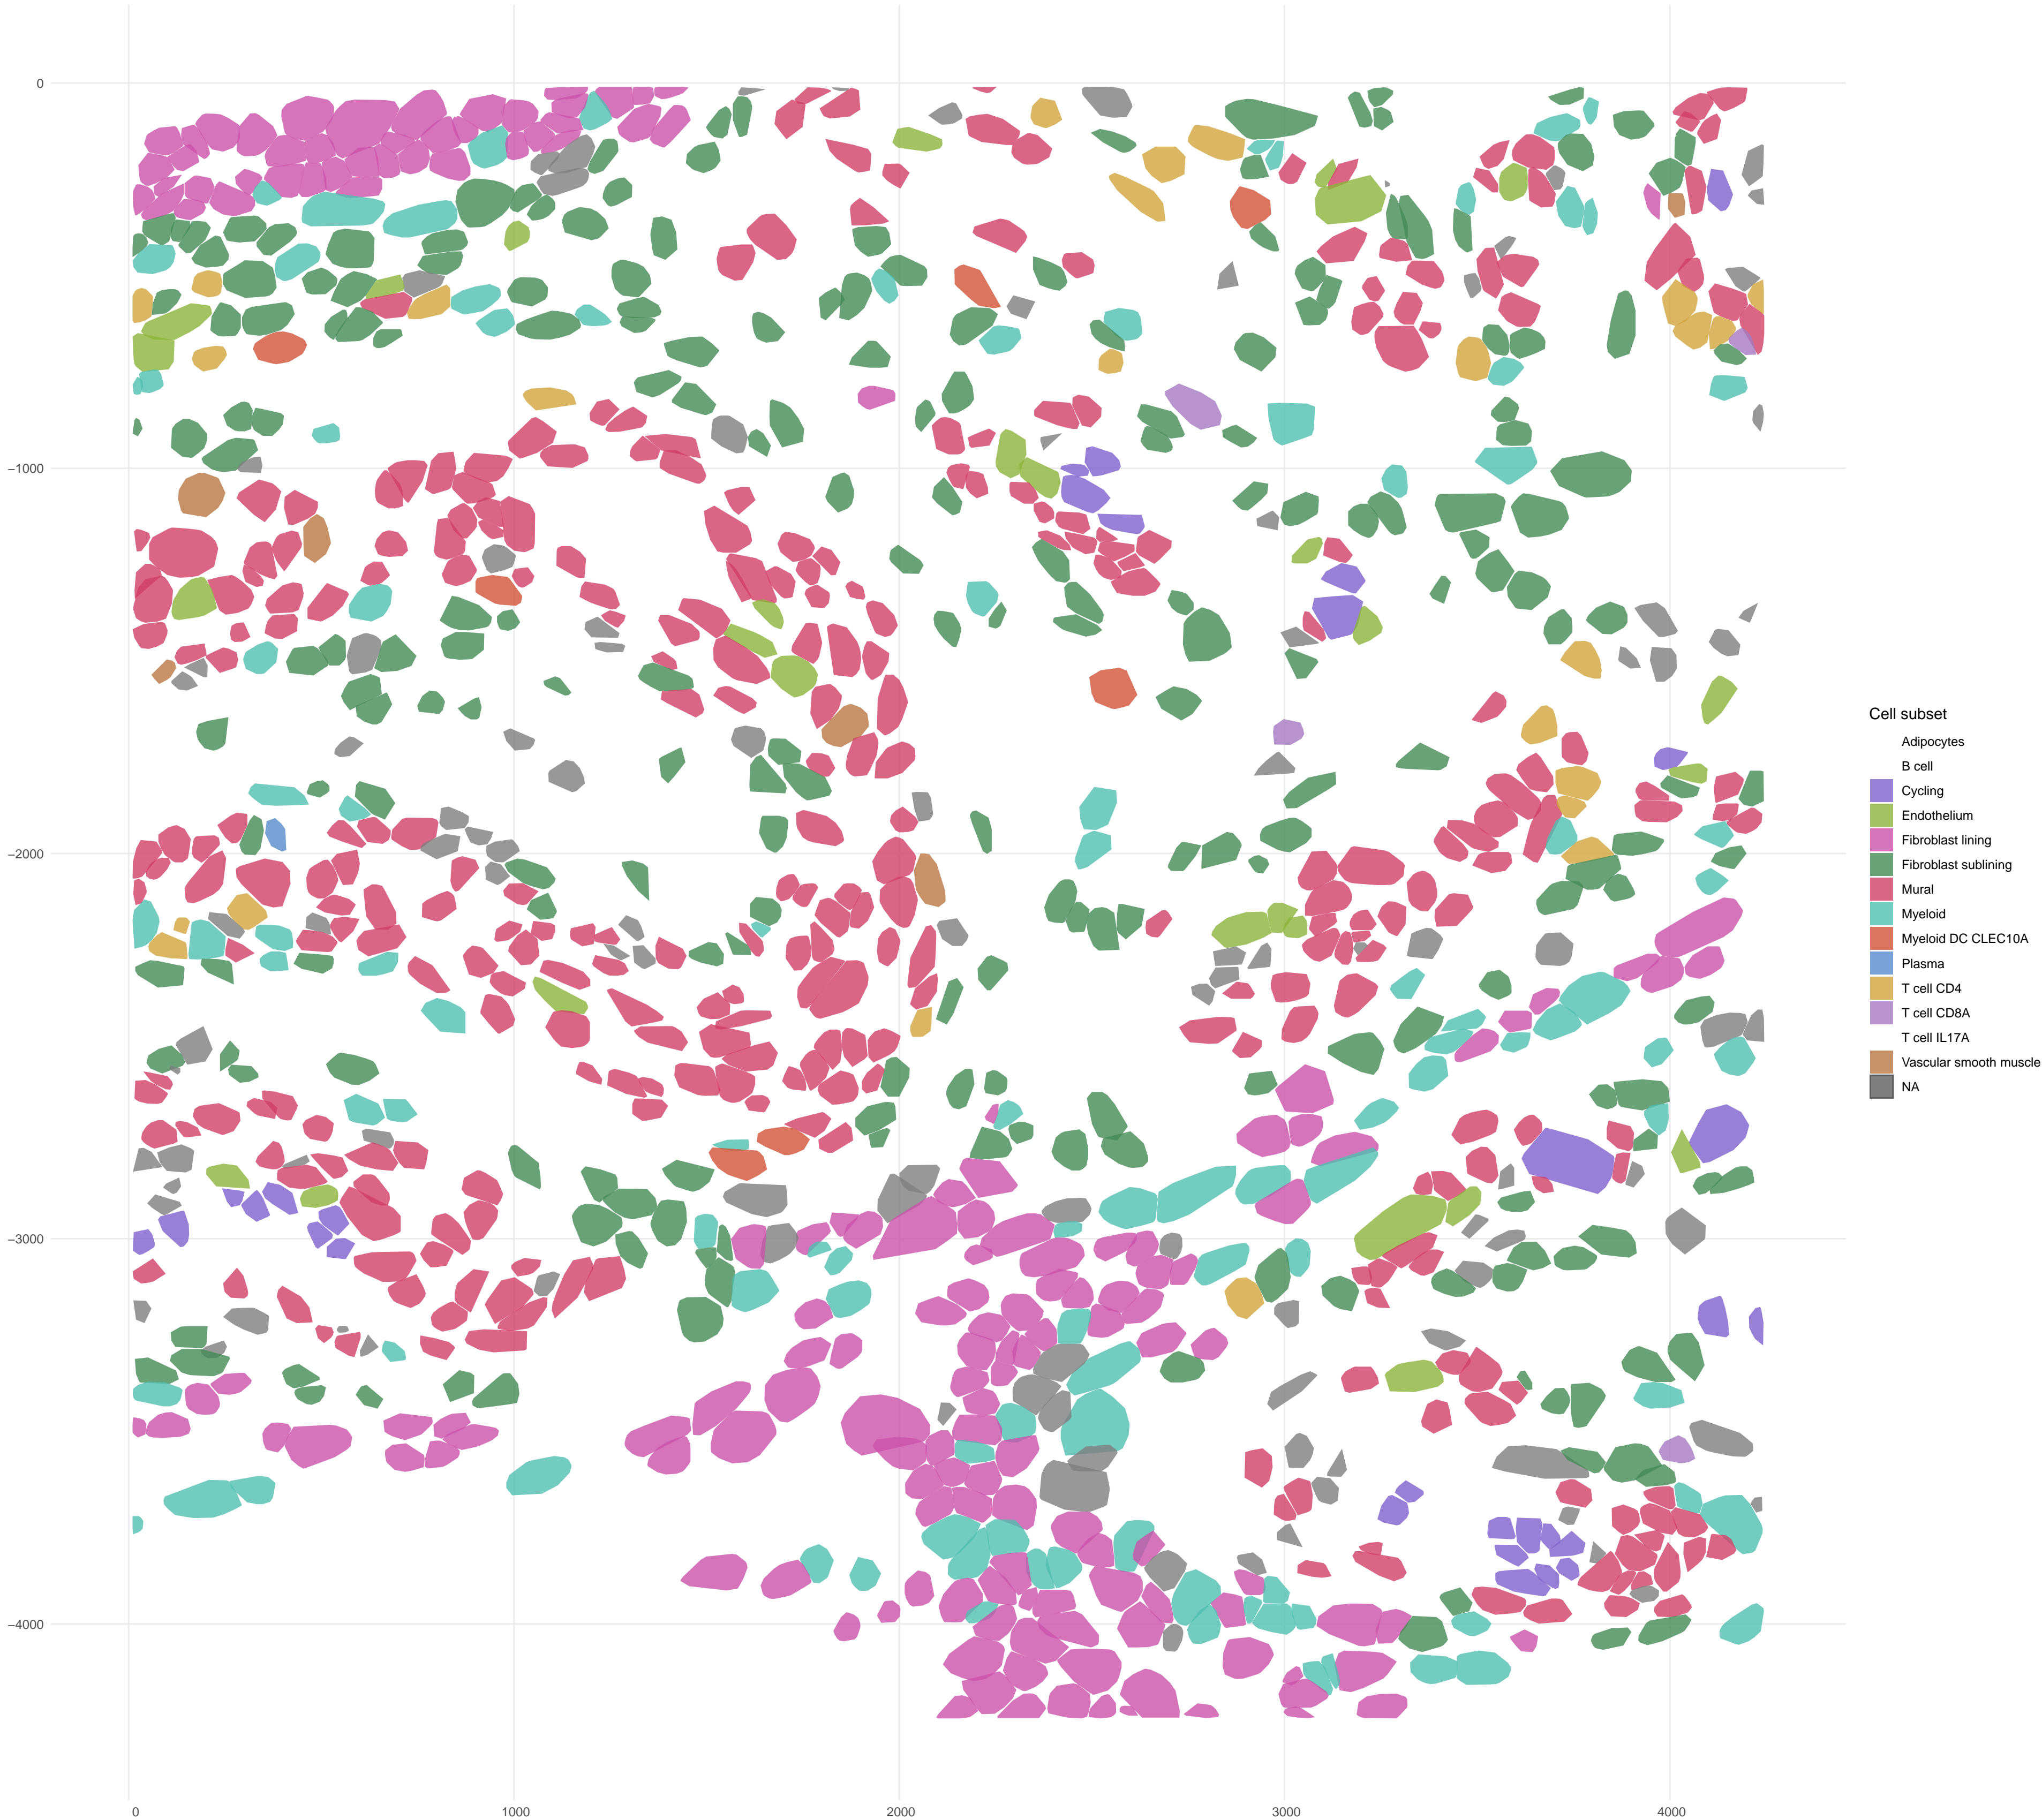



BX427 Baseline

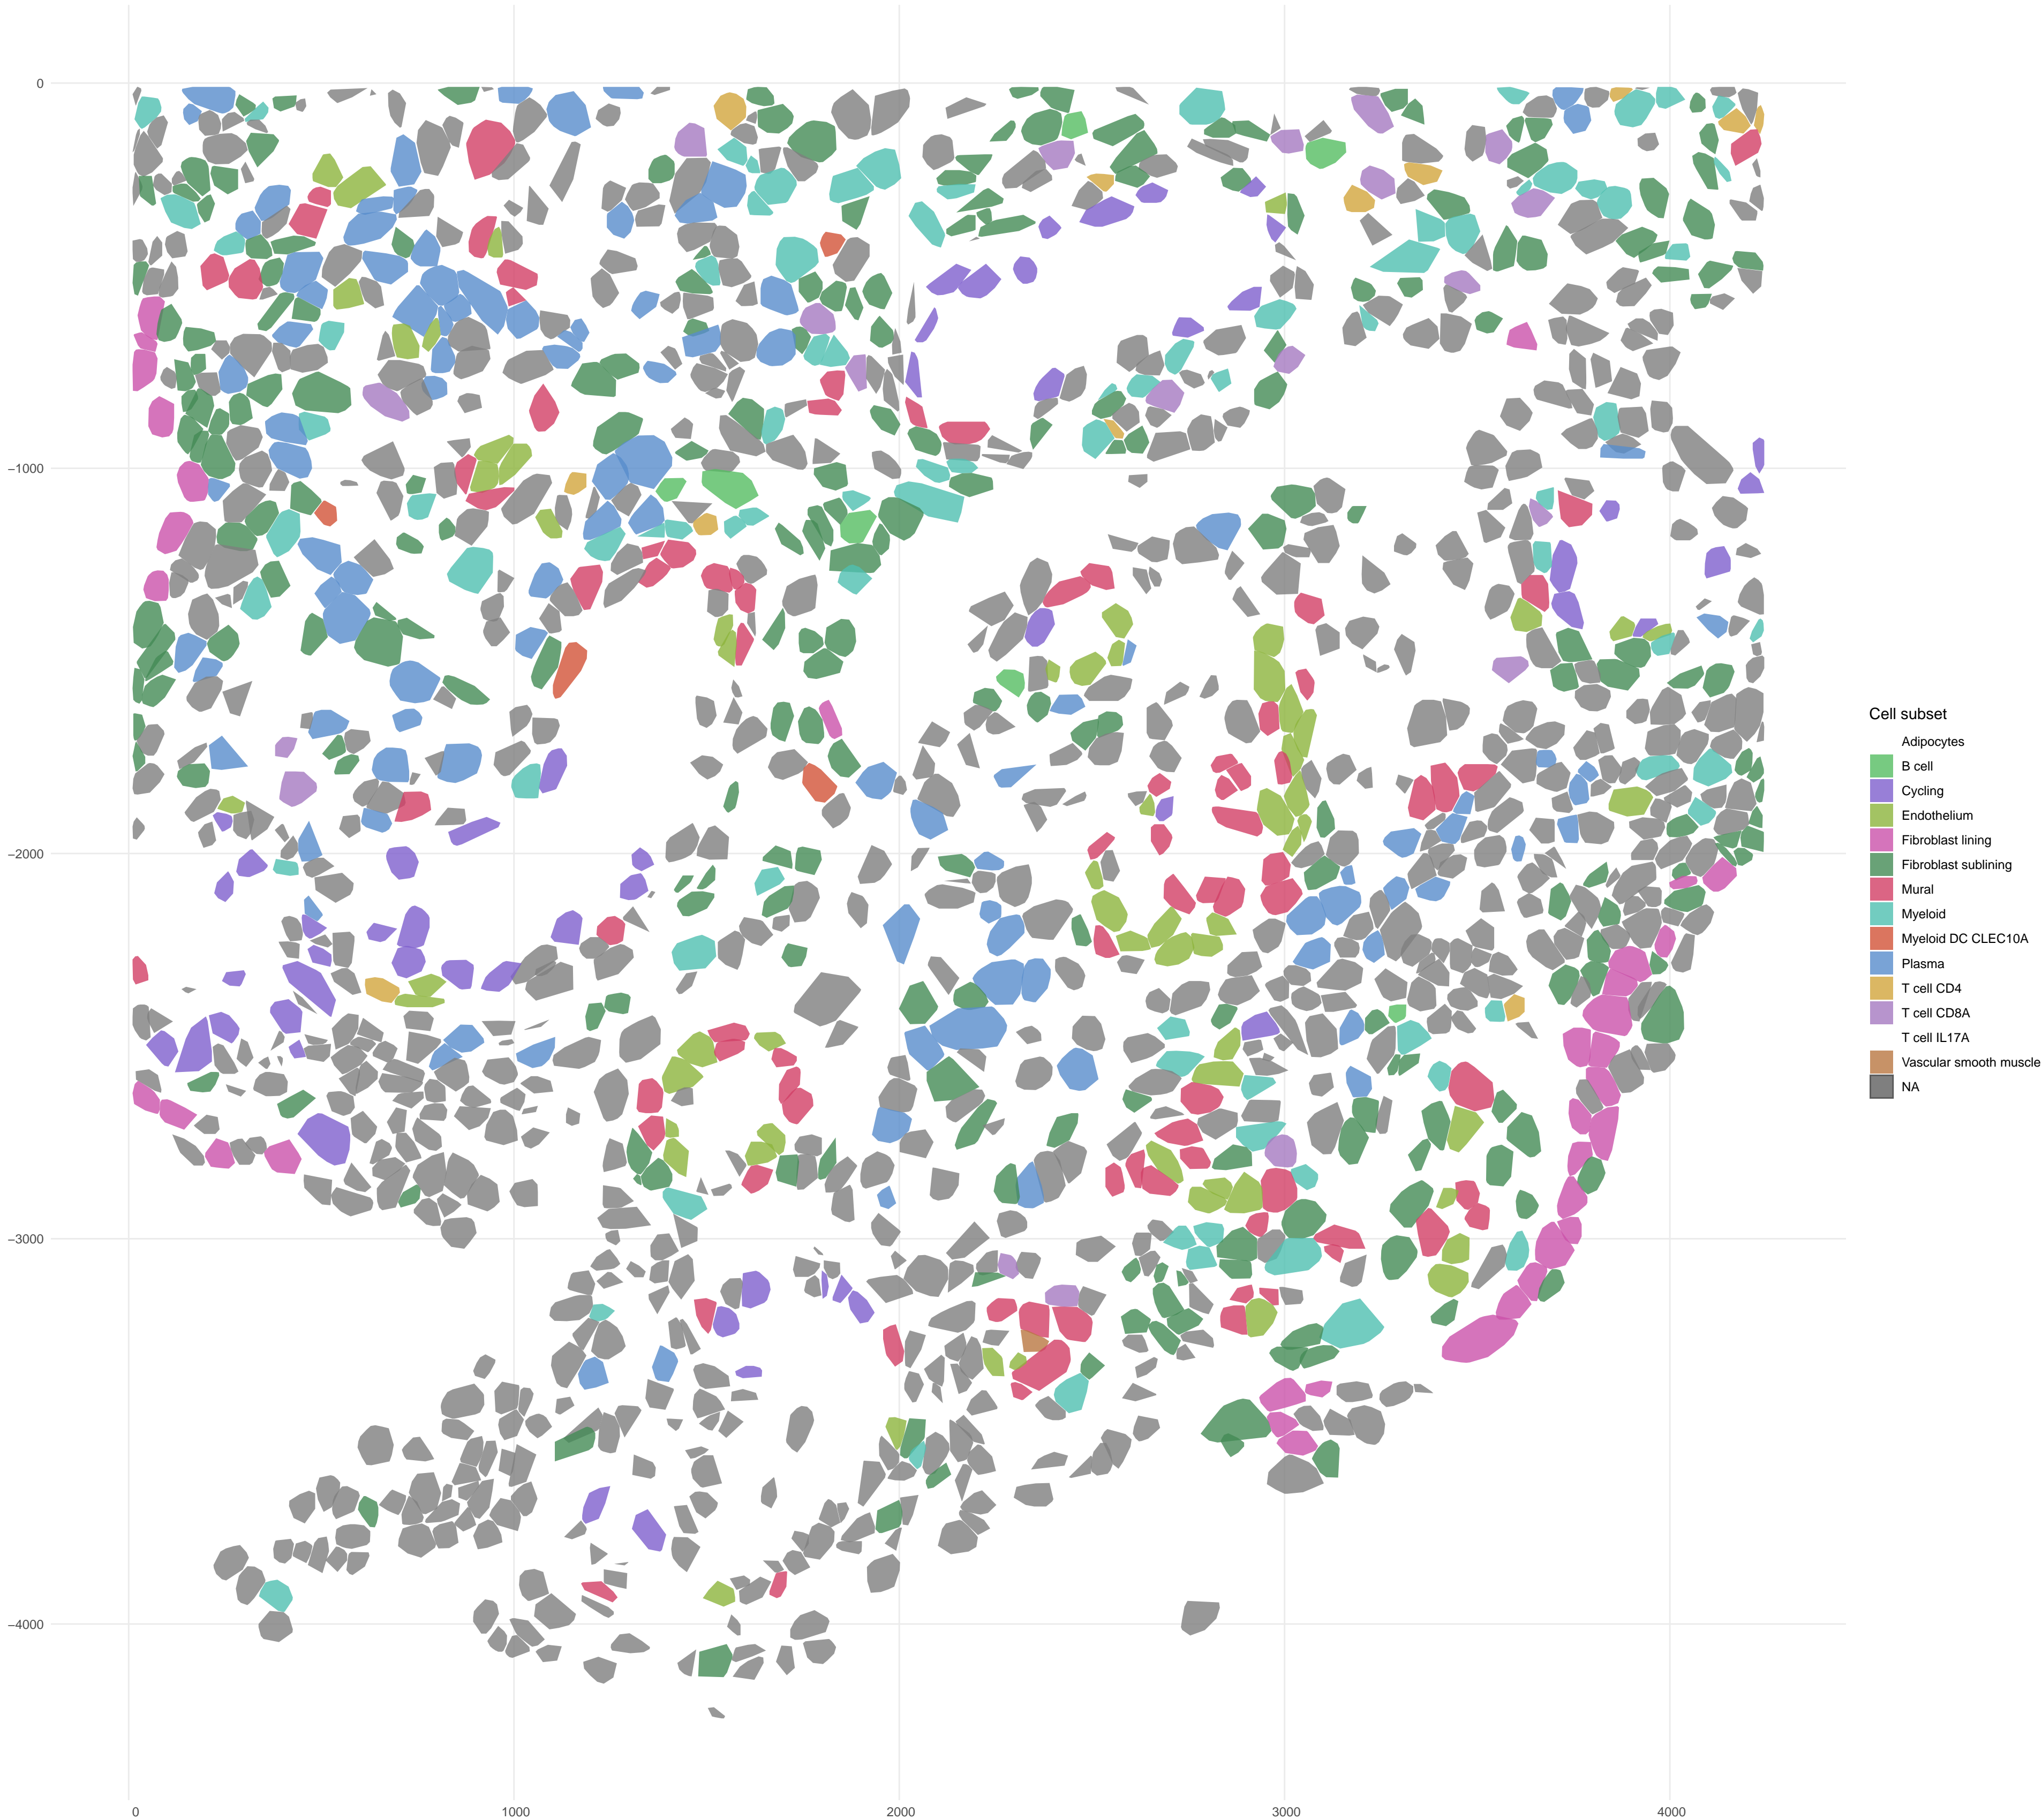

BX439 Post\_Treatment

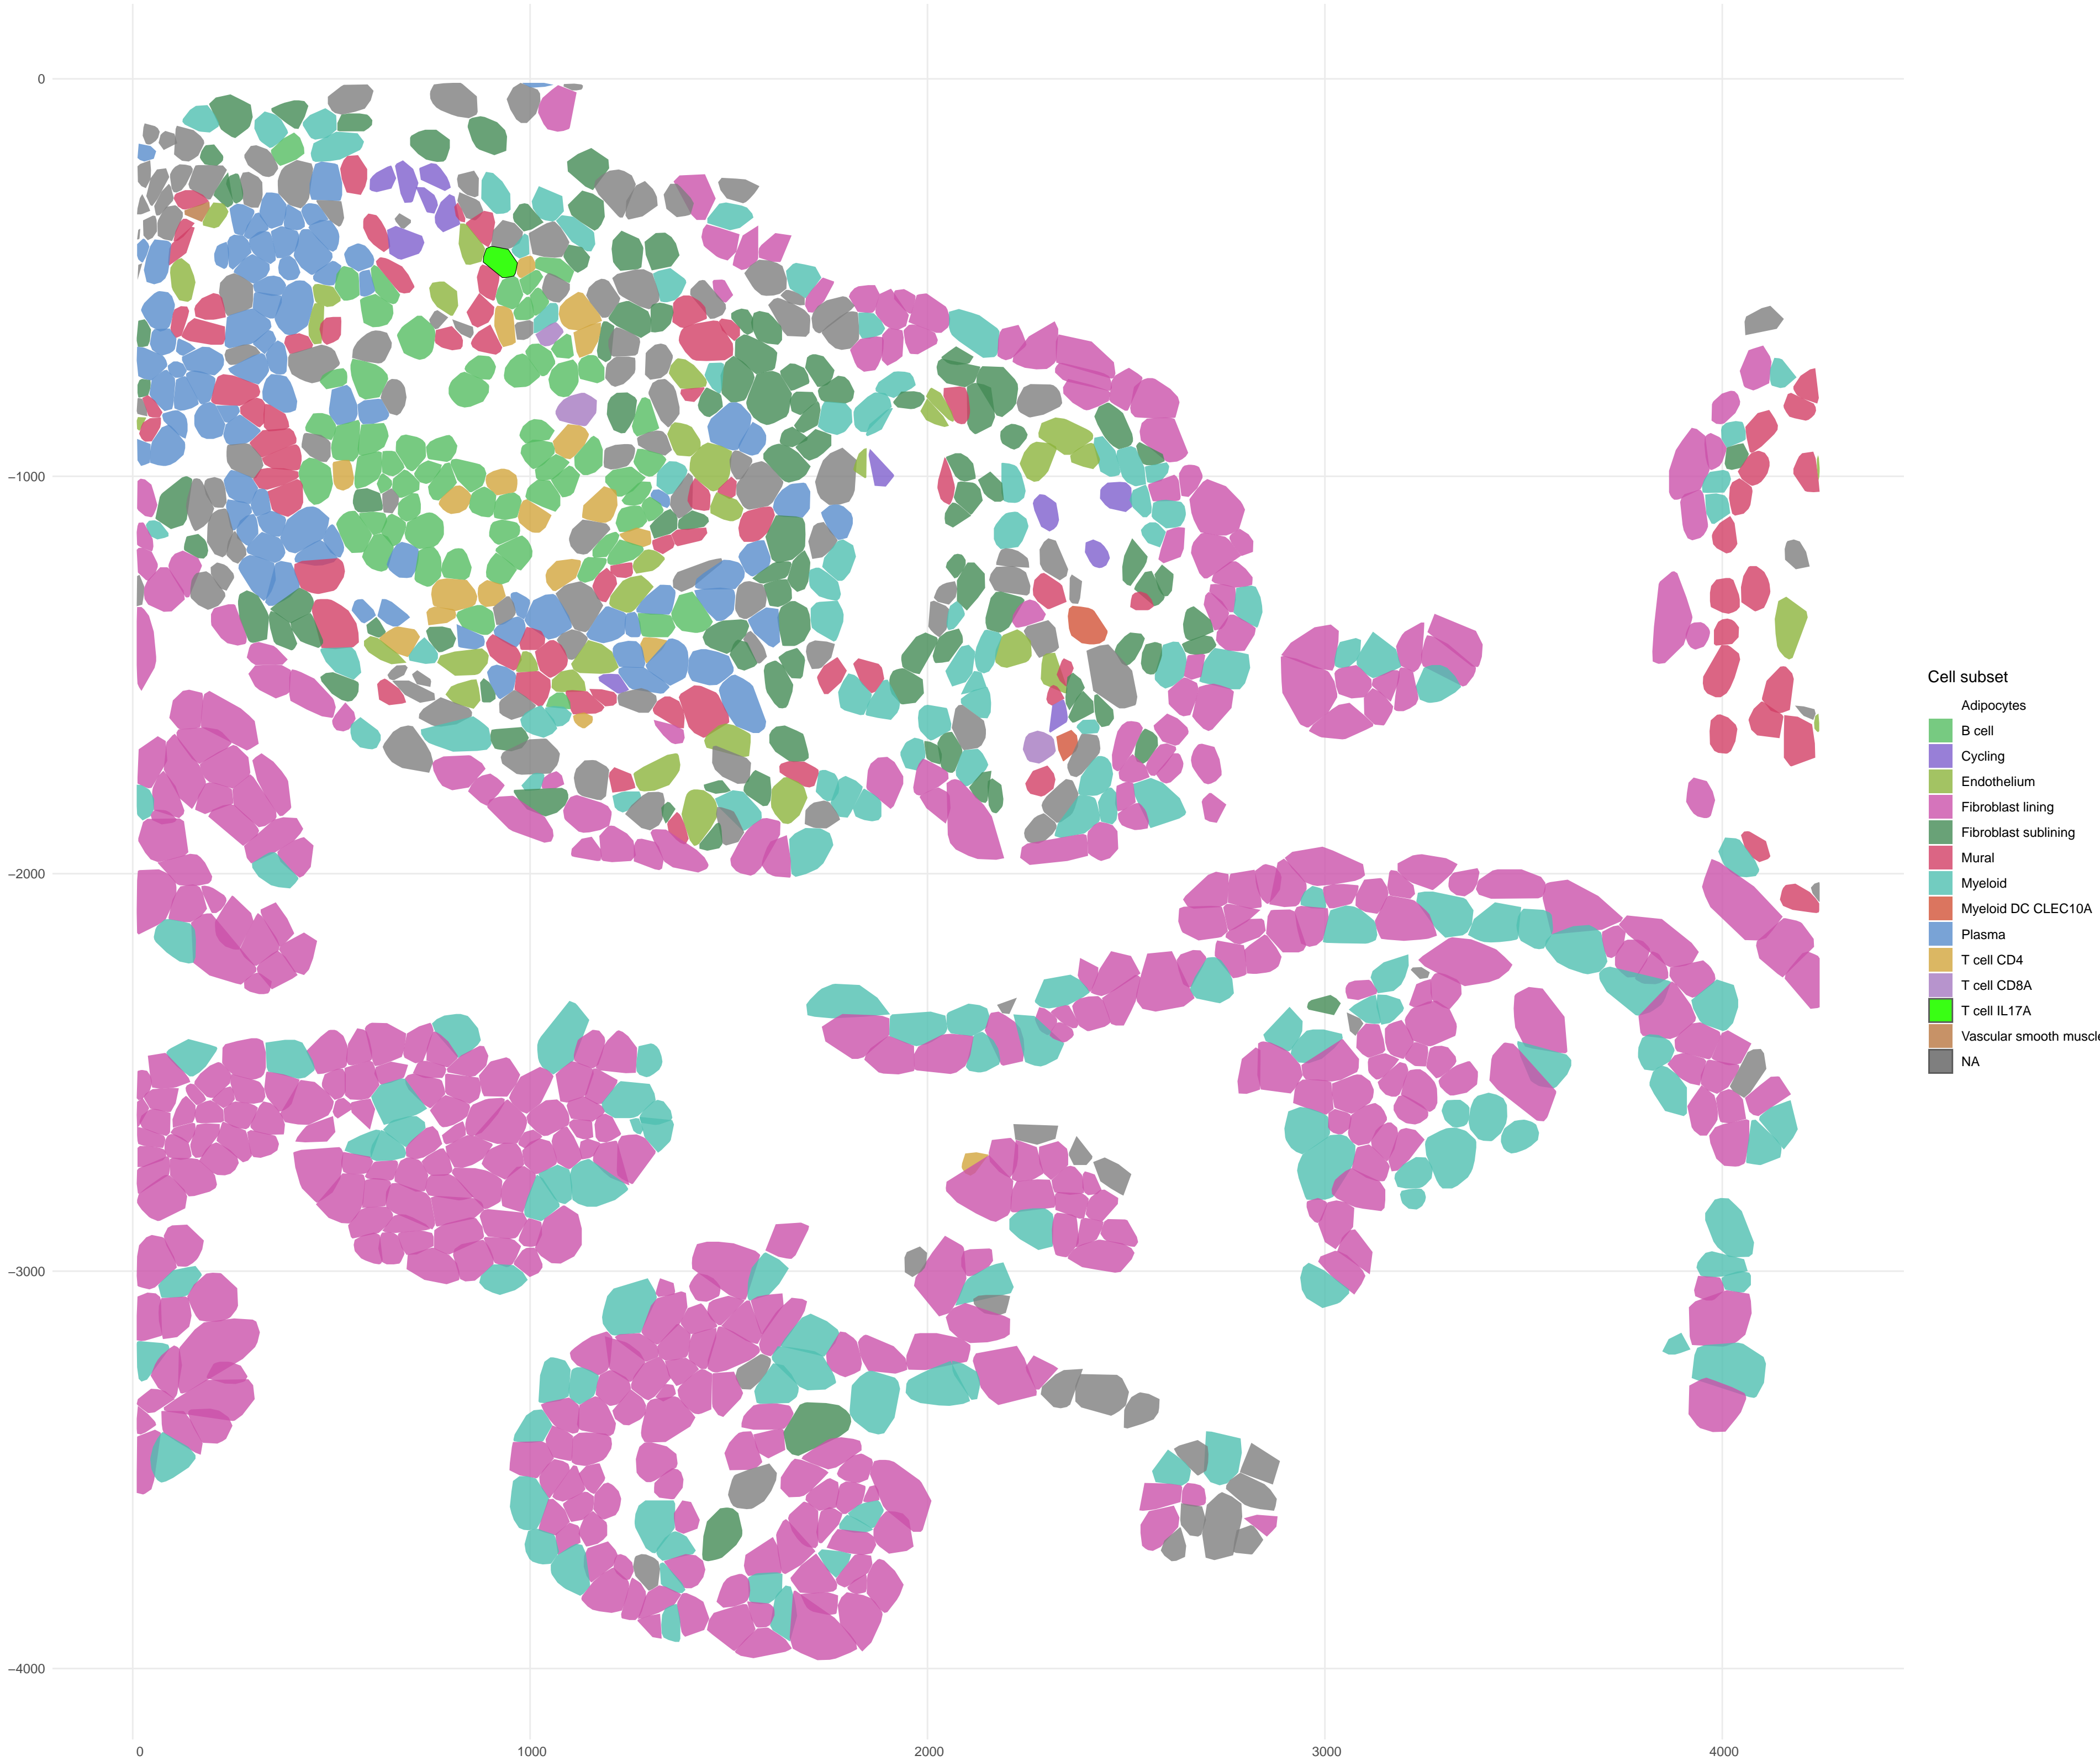



BX427 Baseline

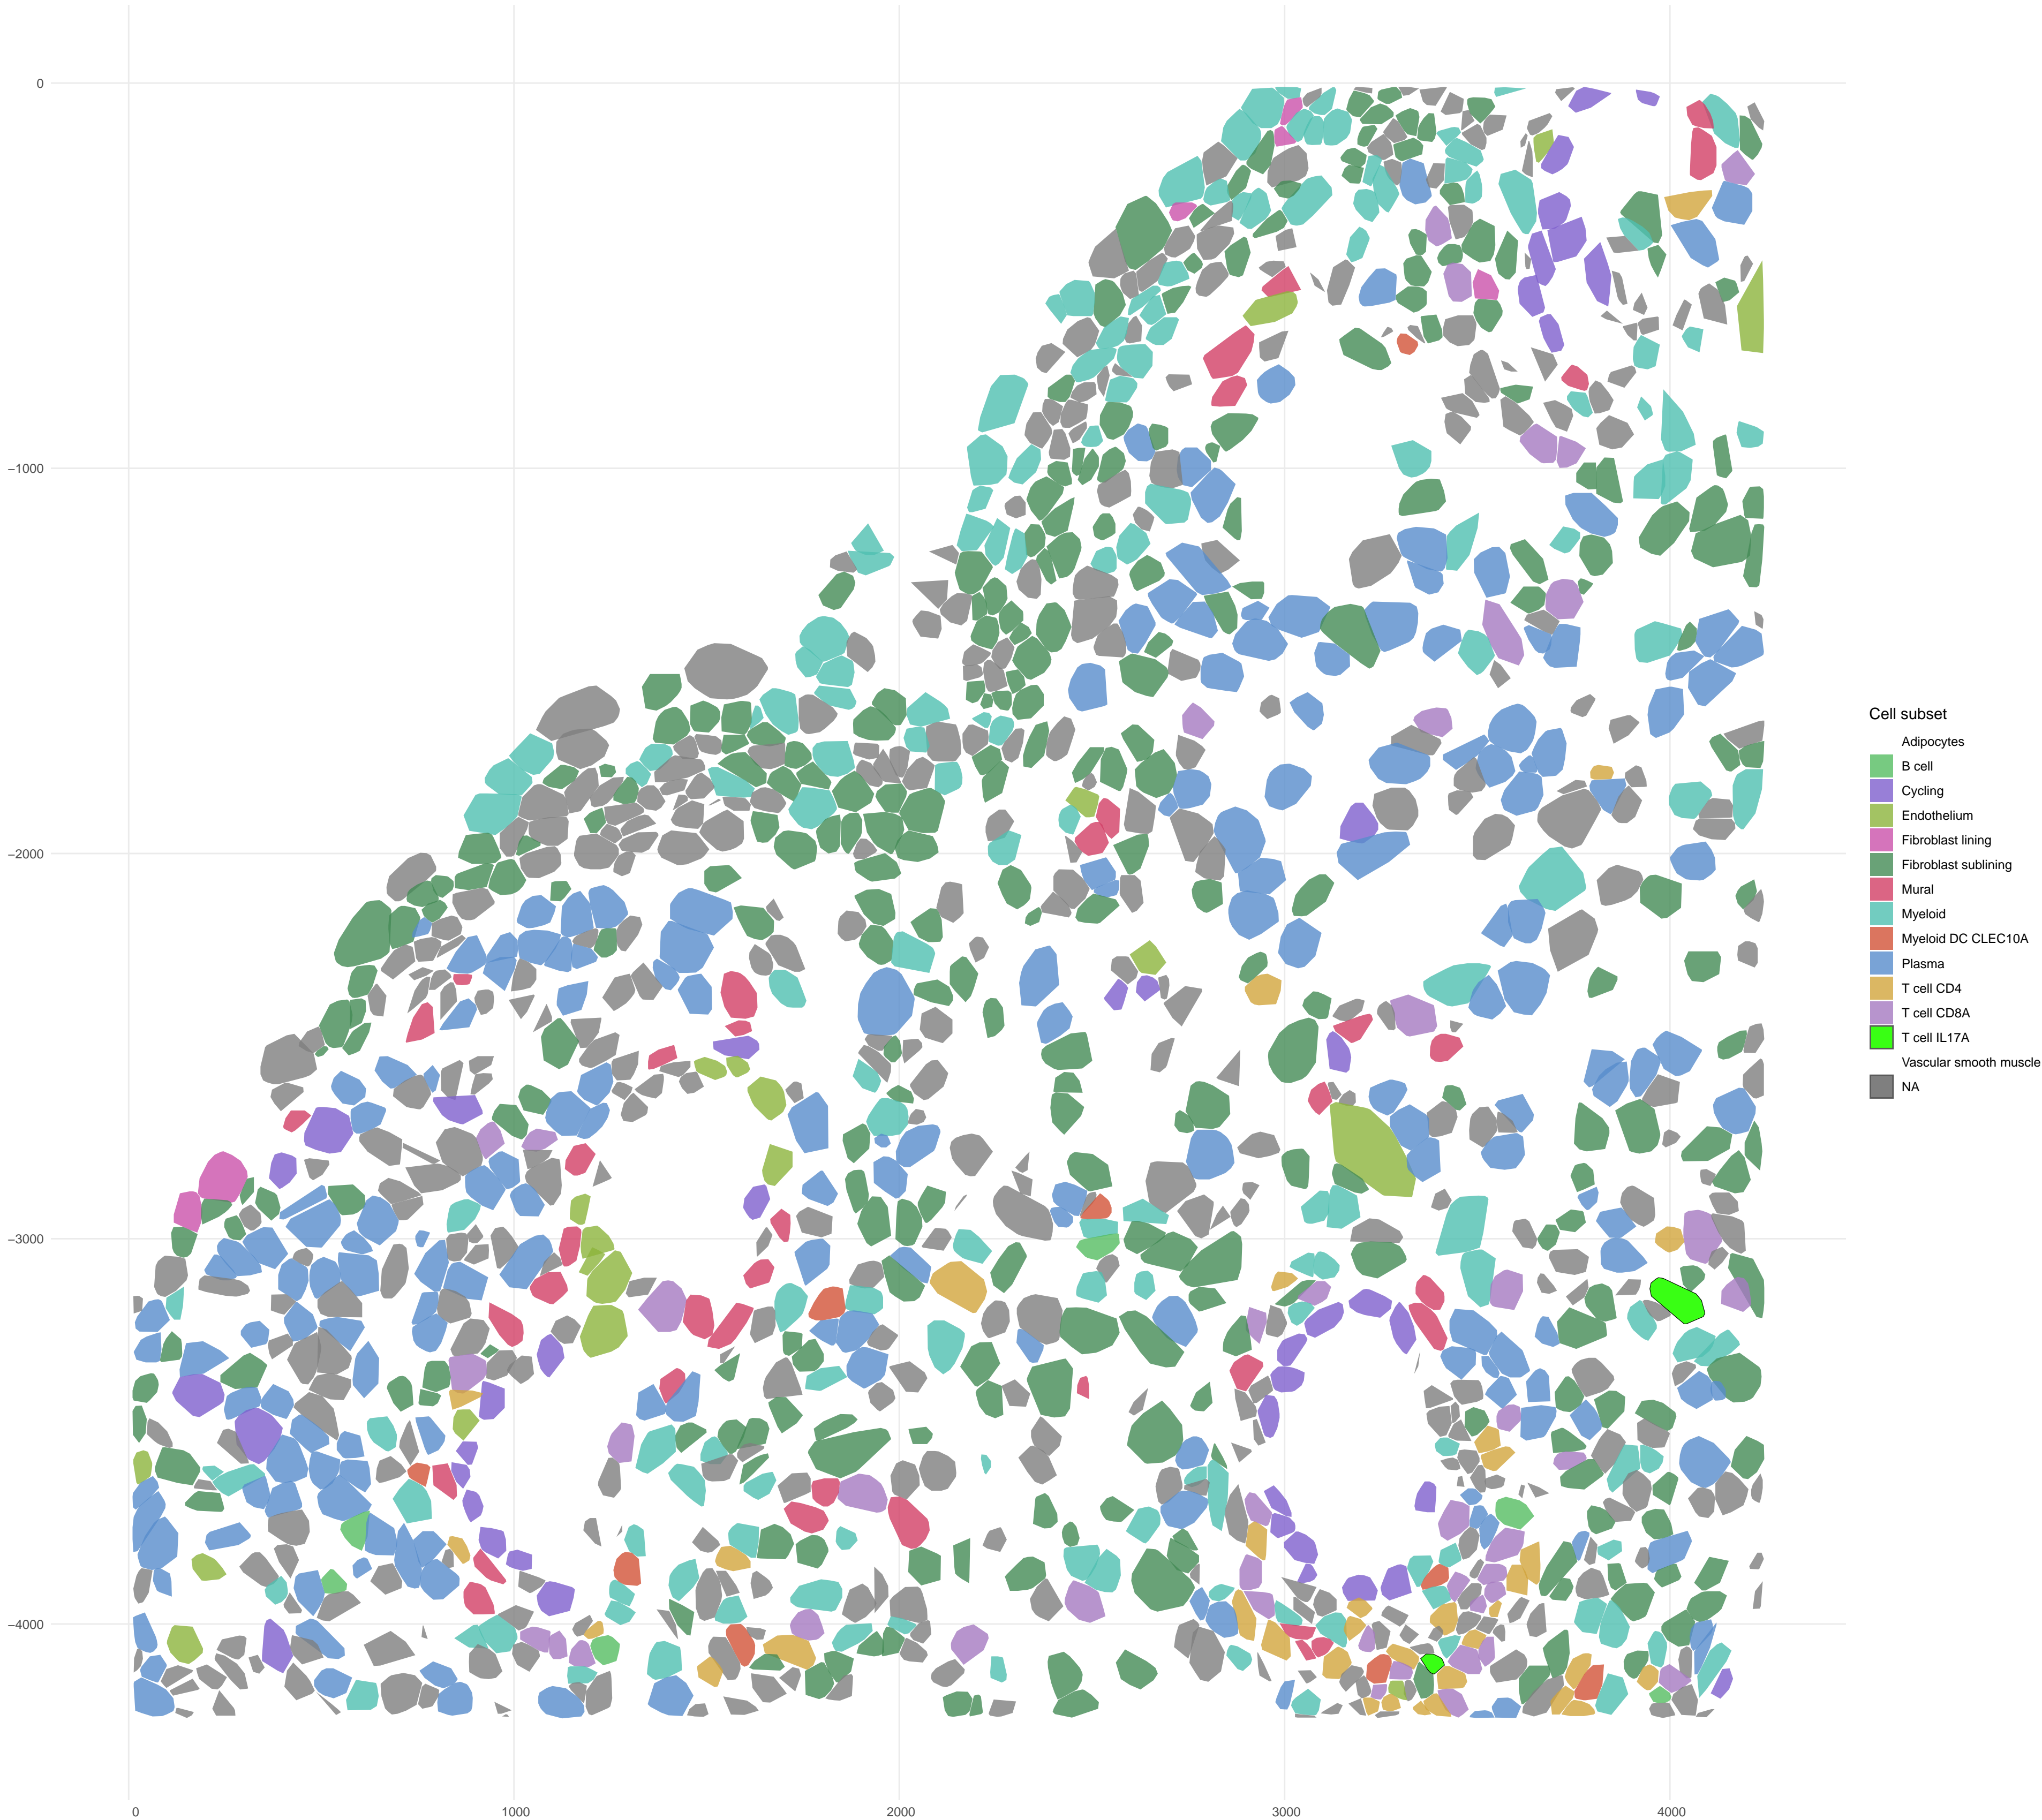



BX439 Post\_Treatment

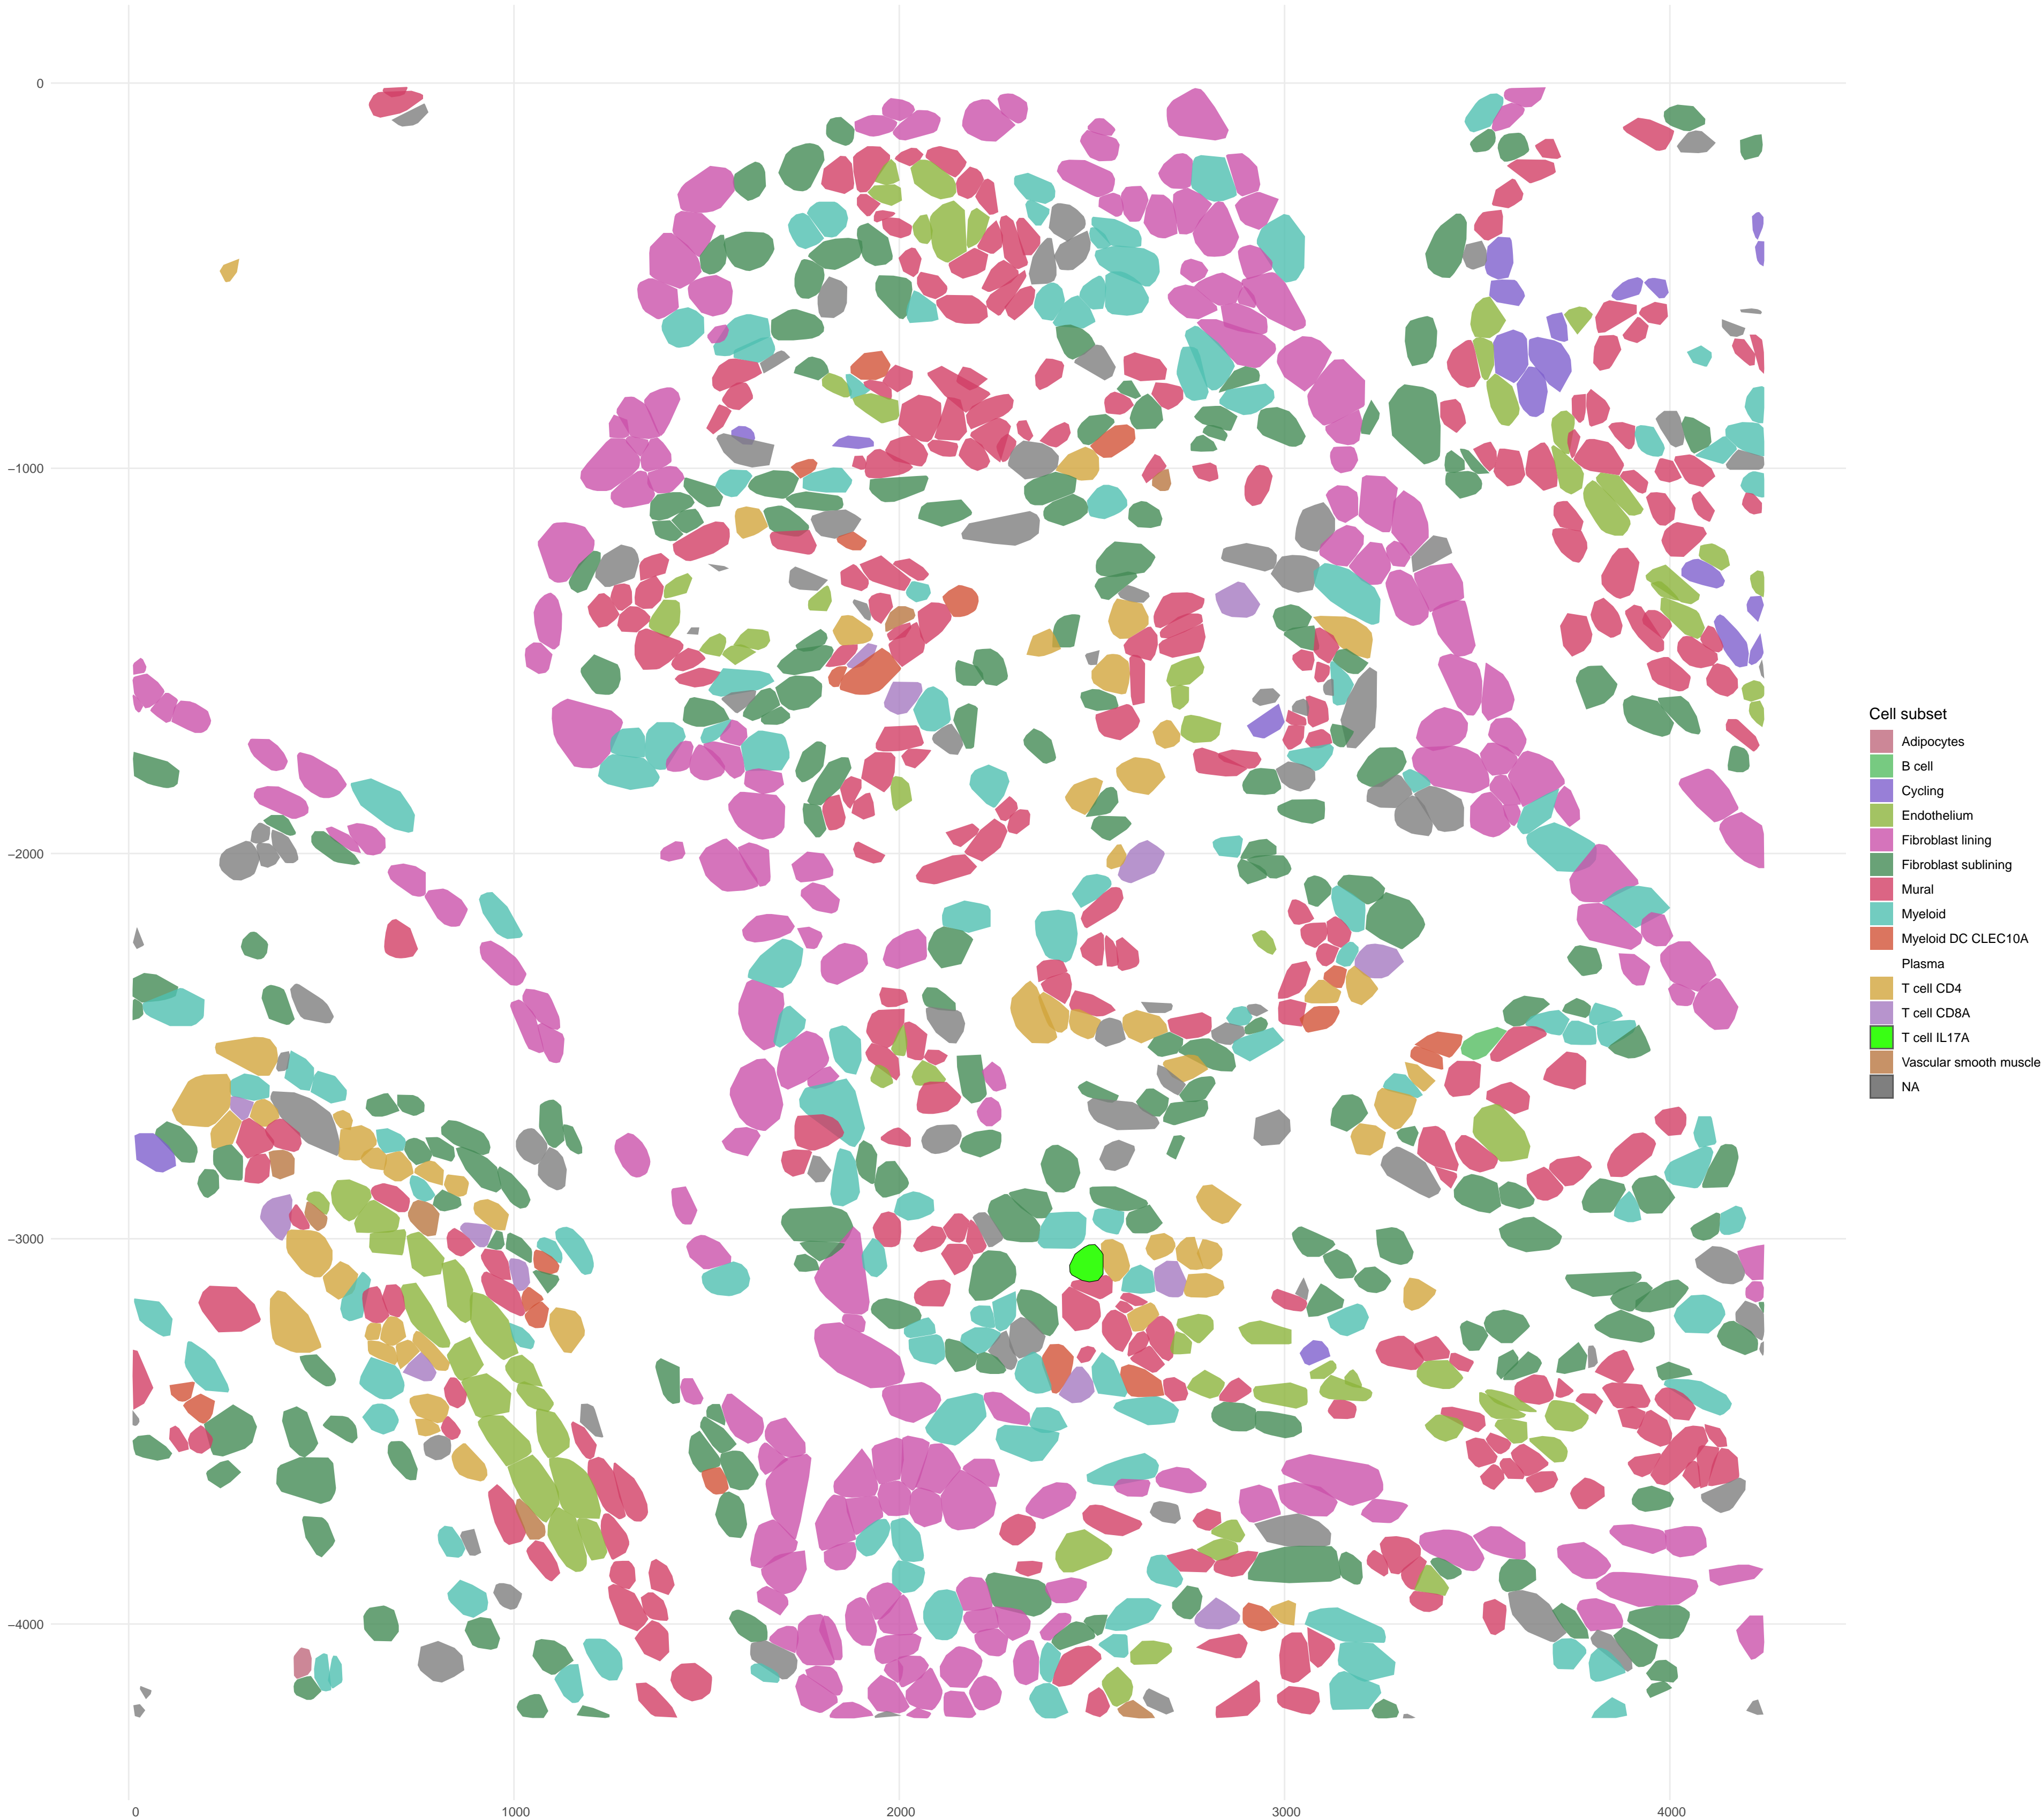

BX427 Baseline

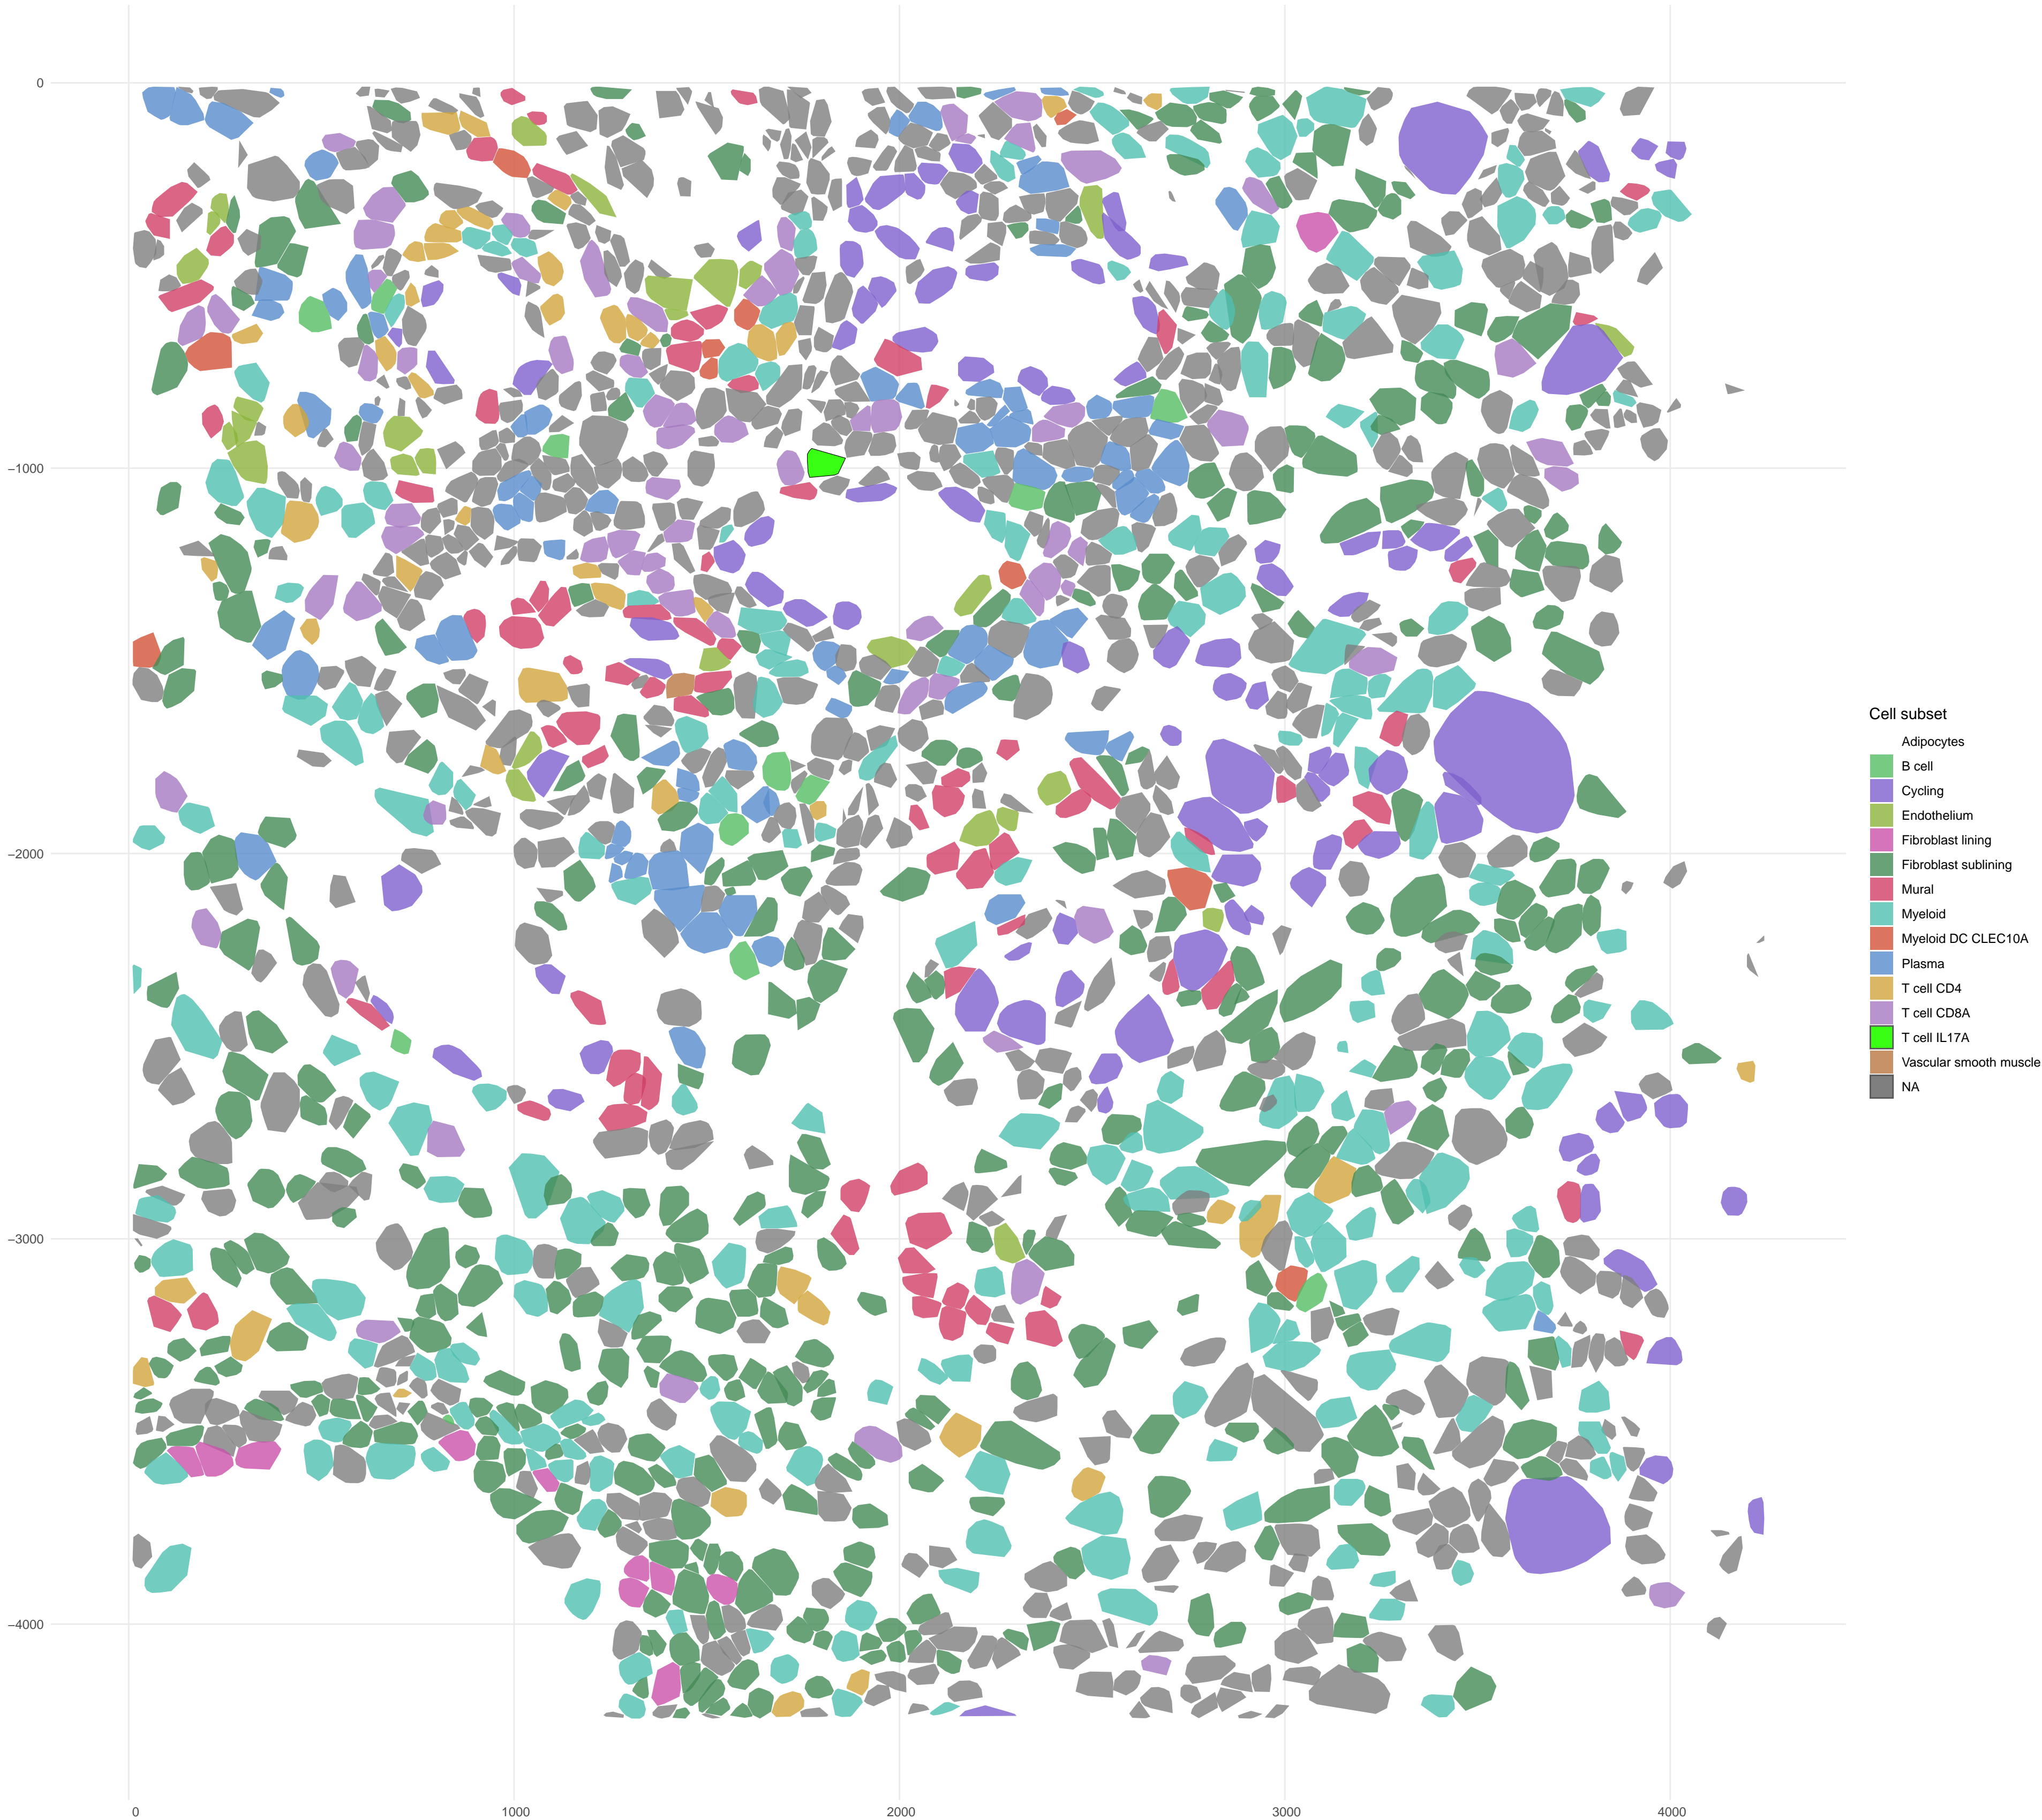

Supplement: mmc3 [file rzp38wf87f:mmc3.pdf]
